# Supplementary material for: Metabolite profiling of endophytic Streptomyces spp. and its antiplasmodial potential
Source: PeerJ. 2021 Mar 15;9:e10816. doi: 10.7717/peerj.10816 (PMC7971094; doi:10.7717/peerj.10816)
Supplement: Supplemental Information 1 [file peerj-09-10816-s001.xlsx]

## Sheet: Sheet1
Polarity	MZMine ID	m/z	Rt	Related	MW	ppm	formula	Name	Source	acnblk	s12s48	s12s48	s12s48	s12s48	s12s48	s12s48	s12s48	s12s48	s12s48	s12s48	s12s48	s12s48	s12s48	s12s48	s12s48	s12s48	s12s48	s12s48	s12s48	s12s48	s12s48	s12s48	s12s48	s12s48	s12s48	s12s48	s12s48	s12s48	s12s48	s12s48	s12s48	s12s48	s12s48	s12s48	s12s48	s12s48	s12s48	s12s48	s12s48
P	6364	110.047	1.52915	CH8N3OP	109.04					0	0	0	0	0	0	0	0	60510.2	0	0	0	0	0	42578.2	52084.9	0	0	0	0	0	0	0	44977.1	41832	0	59282.5	0	68450	0	0	0	0	61535	0	0	59890.7	0	0	0
P	6709	110.049	1.62068	CH8N3OP	109.041					0	0	0	0	0	0	0	0	0	0	0	0	0	0	0	0	0	0	0	0	0	0	0	0	0	0	0	0	0	0	0	0	0	0	0	0	0	0	0	0
P	3120	110.05	1.61622	H7N5S	109.042					0	0	0	0	0	0	0	0	0	0	0	0	0	0	0	0	116123	124577	0	0	0	0	0	0	0	115907	0	0	0	0	0	0	0	0	0	0	0	0	0	122437
P	2689	110.051	1.62042		109.044					0	0	0	0	0	0	0	0	0	0	0	0	0	139888	0	0	0	0	131667	142428	148622	0	0	0	0	0	0	0	0	0	0	0	0	0	0	0	0	0	120841	0
P	2199	110.053	1.61566		109.045					0	0	0	0	0	0	0	91428.4	92740.4	0	88055.2	81281.3	0	0	0	0	0	0	0	0	0	161080	159705	0	149629	0	0	0	0	0	0	0	90648.7	0	81215.4	0	0	131201	0	0
P	2800	110.054	1.52786		109.046					0	0	0	0	0	0	0	0	93953.9	0	0	0	0	0	153870	163156	0	0	0	0	0	0	0	165559	73906.3	0	102299	0	91866.8	0	0	0	0	92542.7	0	0	100433	0	0	0
P	642	110.056	1.61281	CH7N3O3	109.049					0	0	103756	95378	93361.1	0	0	0	0	0	0	0	0	0	0	0	162576	159022	0	0	0	0	0	0	0	106585	0	89092.3	0	0	100198	0	0	0	0	100407	0	0	0	189566
P	525	110.058	1.61759		109.05					0	90967	0	0	0	98795.8	88648.2	0	0	0	0	0	87886	153617	0	0	0	0	161350	166691	165857	0	0	0	0	0	0	0	0	93699.5	0	95477.5	0	0	0	0	0	0	177839	0
P	2202	110.059	1.61566	H8N5P	109.052					0	0	0	0	0	0	0	87448.4	85470.3	0	82833.7	83187	0	0	0	0	0	0	0	0	0	157289	163771	0	142704	0	0	0	0	0	0	0	86543.3	0	114927	0	0	168088	0	0
P	2810	110.06	1.52915	C6H7NO	109.053	2.78736	2-Aminophenol	C6H7NO	Isol. from Streptomyces sp. and Penicillium notatum. Also isol. from a purple bacterium from a sponge of Adocia sp.	0	0	0	0	0	0	0	0	81494.2	0	0	0	0	0	142542	137127	0	0	0	0	0	0	0	150449	71347	0	84566.6	0	87315.6	0	0	0	0	89826.4	0	0	96608.5	0	0	0
P	6701	110.062	1.62068		109.055					0	0	0	0	0	0	0	0	0	0	0	0	0	0	0	0	0	0	0	0	0	0	0	0	0	0	0	0	0	0	0	0	0	0	0	0	0	0	0	0
P	3104	110.063	1.62033	C3H11NOS	109.056					0	0	0	0	0	0	0	0	0	0	0	0	0	0	0	0	129209	117620	0	0	0	0	0	0	0	0	0	0	0	0	0	0	0	0	0	0	0	0	0	152507
P	2737	110.065	1.62052		109.057					0	0	0	0	0	0	0	0	0	0	0	0	0	133336	0	0	0	0	0	113388	0	0	0	0	0	0	0	0	0	0	0	0	0	0	0	0	0	0	120483	0
P	5255	110.066	7.28736	H7N5O2	109.059					0	0	0	0	0	0	0	7859.55	9764.91	5728.51	3809.08	0	0	0	0	0	0	0	0	0	0	5125.59	2891.16	4861.01	3306.7	0	3022.42	0	2535.53	0	0	0	0	5239.73	0	0	1894.07	110937	0	0
P	6390	110.068	1.61827	H7N5O2	109.06					0	0	0	0	0	0	0	0	0	0	0	0	0	0	47266.2	54352.9	0	0	0	0	0	0	0	0	0	0	0	0	60486	0	0	0	0	66496.9	0	0	62639.9	0	0	0
P	6729	111.039	5.32345	C3H11PS	110.032					0	0	0	0	0	0	0	0	0	0	0	0	0	0	0	0	0	0	0	0	0	0	0	0	0	0	0	0	0	0	0	0	0	0	0	0	0	0	0	0
P	6067	111.041	5.33108	C2H2N6	110.034					0	0	0	0	0	0	0	0	0	0	0	0	0	0	0	0	0	0	0	0	0	0	0	0	0	0	0	0	0	0	0	0	0	0	0	0	0	0	0	125517
P	5197	111.043	5.32891	H7N4OP	110.036					0	0	0	0	0	0	0	0	0	0	0	0	0	0	0	0	0	0	0	0	0	0	0	0	0	0	0	0	0	0	0	0	0	0	0	0	0	170015	149338	0
P	6237	111.044	5.22634	C6H6O2	110.037	1.44614	2-Acetylfuran	C6H6O2	Present in various fruits, black tea and other plant materials	0	0	0	0	0	0	0	0	17189.5	0	0	0	0	0	32018.5	34724.9	0	0	0	0	0	0	0	32557.1	28657.3	0	34860	0	51682.1	0	0	0	0	50485.3	0	0	46782.2	0	0	0
P	6682	111.046	5.32345		110.039					0	0	0	0	0	0	0	0	0	0	0	0	0	0	0	0	0	0	0	0	0	0	0	0	0	0	0	0	0	0	0	0	0	0	0	0	0	0	0	0
P	5805	111.048	5.33108	C3H10O2S	110.04					0	0	0	0	0	0	0	0	0	0	0	0	0	0	0	0	0	0	0	0	0	0	0	0	0	0	0	0	0	0	0	0	0	0	0	0	0	0	0	284307
P	5082	111.05	5.31934	C3H12P2	110.042					0	0	0	0	0	0	0	0	0	0	0	0	0	0	0	0	0	0	0	0	0	0	0	0	0	0	0	0	0	0	0	0	0	0	0	0	0	309861	306204	0
P	6198	111.051	5.31766	H6N4O3	110.043					0	0	0	0	0	0	0	29505.7	14608.6	25084.3	0	0	0	0	37953.3	37770.8	0	0	0	0	0	35055.6	0	38906.8	35814.1	0	65039.9	0	65037	0	0	0	0	65707.4	0	0	63222.3	0	0	0
P	6679	111.053	5.32345		110.046					0	0	0	0	0	0	0	0	0	0	0	0	0	0	0	0	0	0	0	0	0	0	0	0	0	0	0	0	0	0	0	0	0	0	0	0	0	0	0	0
P	5793	111.054	5.33108	C5H6N2O	110.047					0	0	0	0	0	0	0	0	0	0	0	0	0	0	0	0	0	0	0	0	0	0	0	0	0	0	0	0	0	0	0	0	0	0	0	0	0	0	0	336738
P	5083	111.056	5.31934	C3H11O2P	110.049					0	0	0	0	0	0	0	0	0	0	0	0	0	0	0	0	0	0	0	0	0	0	0	0	0	0	0	0	0	0	0	0	0	0	0	0	0	307078	335750	0
P	6226	111.057	5.31678	C3H11O2P	110.05					0	0	0	0	0	0	0	23328.6	16034.8	13118.1	0	0	0	0	29631	27202	0	0	0	0	0	31509.9	0	32777.9	30800.5	0	53161.9	0	54022.1	0	0	0	0	50268.2	0	0	50948.7	0	0	0
P	6686	111.059	5.32345	C2H10N2OS	110.052					0	0	0	0	0	0	0	0	0	0	0	0	0	0	0	0	0	0	0	0	0	0	0	0	0	0	0	0	0	0	0	0	0	0	0	0	0	0	0	0
P	5822	111.061	5.33942		110.054					0	0	0	0	0	0	0	0	0	0	0	0	0	0	0	0	0	0	0	0	0	0	0	0	0	0	0	0	0	0	0	0	0	0	0	0	0	0	0	237823
P	5156	111.063	5.32613		110.056					0	0	0	0	0	0	0	0	0	0	0	0	0	0	0	0	0	0	0	0	0	0	0	0	0	0	0	0	0	0	0	0	0	0	0	0	0	195169	221634	0
P	6346	111.064	5.26208	C3H10O4	110.057					0	0	0	0	0	0	0	0	11883.3	0	0	0	0	0	9701.19	11048.2	0	0	0	0	0	0	0	18499.5	23074.2	0	26241.7	0	19178.9	0	0	0	0	33487.6	0	0	30764.2	0	0	0
P	6714	111.066	5.32345	C4H6N4	110.059					0	0	0	0	0	0	0	0	0	0	0	0	0	0	0	0	0	0	0	0	0	0	0	0	0	0	0	0	0	0	0	0	0	0	0	0	0	0	0	0
P	5949	111.068	5.33108	C2H11N2OP	110.061					0	0	0	0	0	0	0	0	0	0	0	0	0	0	0	0	0	0	0	0	0	0	0	0	0	0	0	0	0	0	0	0	0	0	0	0	0	0	0	144105
P	5361	111.069	5.31504	CH10N4S	110.062					0	0	0	0	0	0	0	0	0	0	0	0	0	0	0	0	0	0	0	0	0	0	0	0	0	0	0	0	0	0	0	0	0	0	0	0	0	115846	131919	0
P	6548	112.012	6.62802		111.005					0	0	0	0	0	0	0	59728.1	61514.3	54379	54616.3	0	0	0	82469.7	0	0	0	0	0	0	67899.3	72219.4	87110.5	76581.1	0	81748.6	0	83030.6	0	0	0	0	83662.2	0	0	81741.2	0	0	0
P	5988	112.015	6.64049	C3HN3O2	111.008					0	0	0	0	0	0	0	0	0	0	0	0	0	0	0	0	0	0	0	0	0	0	0	0	0	0	0	0	0	0	0	0	0	0	0	0	0	0	0	172276
P	6742	112.016	6.6576	CH6NO3P	111.009					0	0	0	0	0	0	0	0	0	0	0	0	0	0	0	0	0	0	0	0	0	0	0	0	0	0	0	0	0	0	0	0	0	0	0	0	0	0	0	0
P	5282	112.018	6.63283	H5N3O2S	111.01					0	0	0	0	0	0	0	0	0	0	0	0	0	0	0	0	0	0	0	0	0	0	0	0	0	0	0	0	0	0	0	0	0	0	0	0	0	177195	171776	0
P	6397	112.019	6.60797	H7N3P2	111.012					0	0	0	0	0	0	0	72932.1	72820	67592.3	1670.22	0	0	0	95250.4	73713.9	0	0	0	0	0	89077.5	0	85236.5	87769.1	0	85476.8	0	94752.5	0	0	0	0	100361	0	0	92865.1	0	0	0
P	6720	112.021	6.6411	C5H5NS	111.014					0	0	0	0	0	0	0	0	0	0	0	0	0	0	0	0	0	0	0	0	0	0	0	0	0	0	0	0	0	0	0	0	0	0	0	0	0	0	0	0
P	5968	112.022	6.63988	C5H5NS	111.015					0	0	0	0	0	0	0	0	0	0	0	0	0	0	0	0	0	0	0	0	0	0	0	0	0	0	0	0	0	0	0	0	0	0	0	0	0	0	0	178230
P	5667	112.024	6.62462	CH5NO5	111.016					0	0	0	0	0	0	0	0	0	0	0	0	0	0	0	0	0	0	0	0	0	0	0	0	0	0	0	0	0	0	0	0	0	0	0	0	0	0	163634	0
P	6741	112.043	1.42033	C2H9NO2S	111.036					0	0	0	0	0	0	0	0	0	0	0	0	0	0	0	0	0	0	0	0	0	0	0	0	0	0	0	0	0	0	0	0	0	0	0	0	0	0	0	0
P	5580	112.044	1.42067	C2H11NP2	111.037					0	0	0	0	0	0	0	0	0	0	0	0	0	0	0	0	0	0	0	0	0	0	0	0	0	0	0	0	0	0	0	0	0	0	0	0	0	0	73898.7	0
P	6505	112.046	2.53856		111.038					0	0	0	0	0	0	0	1080.41	1433.45	858.358	1931.22	0	0	0	2140.79	0	0	0	0	0	0	2000.33	1158.78	3479.15	2224.95	0	1302.91	0	2125.32	0	0	0	0	940.673	0	0	1925.33	0	0	0
P	6740	112.05	1.42033		111.042					0	0	0	0	0	0	0	0	0	0	0	0	0	0	0	0	0	0	0	0	0	0	0	0	0	0	0	0	0	0	0	0	0	0	0	0	0	0	0	0
P	5549	112.051	1.42067	C4H5N3O	111.043	1.63553	2-Amino-4-hydroxypyrimidine	C4H5N3O		0	0	0	0	0	0	0	0	0	0	0	0	0	0	0	0	0	0	0	0	0	0	0	0	0	0	0	0	0	0	0	0	0	0	0	0	0	0	80992.5	0
P	6519	112.052	1.42043	C2H10NO2P	111.045					0	0	0	0	0	0	0	0	0	0	0	0	0	0	0	0	0	0	0	0	0	0	0	0	0	0	0	0	0	0	0	0	0	0	0	0	0	0	0	0
P	5715	112.057	1.42067		111.05					0	0	0	0	0	0	0	0	0	0	0	0	0	0	0	0	0	0	0	0	0	0	0	0	0	0	0	0	0	0	0	0	0	0	0	0	0	0	57354.2	0
P	3153	113.022	2.35443		112.014					0	0	0	0	0	0	0	0	0	0	0	0	0	0	0	0	0	62595.6	0	0	0	0	0	0	0	0	0	0	0	0	0	0	0	0	0	0	0	0	0	0
P	2657	113.023	2.34285	C5H4O3	112.016					0	0	0	0	0	0	0	0	0	0	0	0	0	82675.4	0	0	0	0	66880.6	0	75053	0	0	0	0	0	0	0	0	0	0	0	0	0	0	0	0	0	0	0
P	3354	113.024	2.32083	C5H4O3	112.017					0	0	0	0	0	0	0	0	0	0	0	0	0	0	0	0	0	0	0	0	0	90620.7	80163.7	0	0	0	0	0	0	0	0	0	0	0	0	0	0	0	0	0
P	2784	113.025	2.28007		112.018					0	0	0	0	0	0	0	0	2970.47	2669.08	3967.8	0	0	0	99252.7	102055	0	0	0	0	0	94701.6	0	93228.9	88309.1	0	10160.9	0	8178.28	0	0	0	0	12885.8	0	0	4118.57	0	0	0
P	3052	113.028	2.34596	C2H10OP2	112.021					0	0	0	0	0	0	0	0	0	0	0	0	0	0	0	0	103826	108839	0	0	0	0	0	0	0	0	0	0	0	0	0	0	0	0	0	0	0	0	0	0
P	2634	113.03	2.34159	CH9N2PS	112.022					0	0	0	0	0	0	0	0	0	0	0	0	0	115367	0	0	0	0	102806	109780	109304	0	0	0	0	0	0	0	0	0	0	0	0	0	0	0	0	0	0	0
P	3348	113.031	2.32083	N8	112.024					0	0	0	0	0	0	0	0	0	0	0	0	0	0	0	0	0	0	0	0	0	113213	105112	0	0	0	0	0	0	0	0	0	0	0	0	0	0	0	0	0
P	2770	113.032	2.27381	N8	112.025					0	0	0	0	0	0	0	0	6172.89	5520.35	3426.5	0	0	0	110982	102153	0	0	0	0	0	119563	0	106164	108715	0	9849.67	0	9857.94	0	0	0	0	12039	0	0	4871.55	0	0	0
P	3055	113.035	2.34596	C4H4N2O2	112.027	1.693	2-Butynedioic acid; Diamide	C4H4N2O2	Prod. by Streptomyces chibaensis, Streptomyces reticuli and Streptomyces sp. SF-536	0	0	0	0	0	0	0	0	0	0	0	0	0	0	0	0	100148	93719.3	0	0	0	0	0	0	0	0	0	0	0	0	0	0	0	0	0	0	0	0	0	0
P	2644	113.036	2.34159	C2H9O3P	112.029					0	0	0	0	0	0	0	0	0	0	0	0	0	93731	0	0	0	0	84806.3	86561.8	85587.8	0	0	0	0	0	0	0	0	0	0	0	0	0	0	0	0	0	0	0
P	3360	113.038	2.32083	CH8N2O2S	112.03					0	0	0	0	0	0	0	0	0	0	0	0	0	0	0	0	0	0	0	0	0	79144.1	79174.6	0	0	0	0	0	0	0	0	0	0	0	0	0	0	0	0	0
P	2807	113.039	2.3652	C9H4	112.032					0	0	0	0	0	0	0	0	3992.37	4959.43	0	0	0	0	82319.9	70037.7	0	0	0	0	0	1695.97	0	71824.4	77555.8	0	6282.34	0	7989.04	0	0	0	0	11723.7	0	0	6465.44	0	0	0
P	3096	113.042	2.34596	C6H8S	112.034					0	0	0	0	0	0	0	0	0	0	0	0	0	0	0	0	66487.9	61362.7	0	0	0	0	0	0	0	0	0	0	0	0	0	0	0	0	0	0	0	0	0	0
P	2719	113.043	2.33715		112.036					0	0	0	0	0	0	0	0	0	0	0	0	0	59103.5	0	0	0	0	0	0	0	0	0	0	0	0	0	0	0	0	0	0	0	0	0	0	0	0	0	0
P	6011	113.055	11.2022	CH8N2O4	112.048					0	0	0	0	0	0	0	0	0	0	0	0	0	0	0	0	0	0	0	0	0	0	0	0	0	0	0	0	0	0	0	0	0	0	0	0	0	0	0	109033
P	5321	113.057	11.2027	C2H4N6	112.05					0	0	0	0	0	0	0	0	0	0	0	0	0	0	0	0	0	0	0	0	0	0	0	0	0	0	0	0	0	0	0	0	0	0	0	0	0	112307	105270	0
P	6540	113.058	11.2445	H9N4OP	112.051					0	0	0	0	0	0	2230.73	4487.33	3118.6	2959.84	3071.27	0	0	0	0	0	0	0	0	0	905.05	2263.65	1353.92	0	1382.8	0	64981.3	0	66073.2	0	0	0	0	73458.8	0	0	62615.1	66374.4	0	0
P	6079	113.062	11.21		112.055					0	0	0	0	0	0	0	0	0	0	0	0	0	0	0	0	0	0	0	0	0	0	0	0	0	0	0	0	0	0	0	0	0	0	0	0	0	0	0	98882.1
P	3386	113.086	7.21509		112.078					0	0	0	0	0	0	0	95234	99665.8	92456	82722.7	0	0	0	101151	0	0	0	0	0	0	86662.3	86224.7	103986	95508.5	0	14460.3	0	16466.9	0	0	0	0	14865	0	0	12653.8	3458.2	0	0
P	2514	113.086	7.24215		112.079					0	0	0	0	0	0	0	0	99635.8	0	0	0	0	0	111429	110373	0	0	0	0	0	0	0	97896.6	93193.5	0	14460.3	0	16466.9	0	0	0	0	14865	0	0	12653.8	0	0	0
P	519	113.089	7.23531		112.082					0	106027	112346	118567	113580	0	0	0	0	0	0	0	0	0	0	0	130318	117007	0	0	0	0	0	0	0	0	0	0	0	0	0	0	0	0	0	0	0	0	0	0
P	1258	113.091	7.24488		112.083					0	0	0	0	0	113226	150334	0	0	0	0	115463	112949	120522	0	0	0	0	118340	118909	118385	0	0	0	0	0	0	0	0	0	0	0	0	0	0	0	0	0	0	0
P	2131	113.092	7.21507		112.085					0	0	0	0	0	0	0	155945	124564	113277	116768	0	0	0	0	0	0	0	0	0	111692	115521	119495	108912	120480	0	20088.8	0	19568.6	0	0	0	0	13122.1	0	0	15427.3	2834.74	0	0
P	2819	113.093	7.2033		112.086					0	0	0	0	0	0	0	0	121362	0	0	0	0	0	125425	121831	0	0	0	0	0	0	0	102416	110572	0	2221.35	0	19568.6	0	0	0	0	13122.1	0	0	15427.3	0	0	0
P	535	113.096	7.23531	C7H12O	112.089	-1.54292	4-Cyclohepten-1-ol	C7H12O	Prod. by various bacteria, incl. Saccharopolyspora erythraea	0	114502	140491	138523	149802	0	0	0	0	0	0	0	0	0	0	0	117174	112607	0	0	0	0	0	0	0	0	0	0	0	0	0	0	0	0	0	0	0	0	0	0
P	1300	113.097	7.24488		112.09					0	0	0	0	0	116891	152441	0	0	0	0	189084	117733	141369	0	0	0	0	105770	107410	97886.1	0	0	0	0	0	0	0	0	0	0	0	0	0	0	0	0	0	0	0
P	1771	118.011	8.92667		117.004					0	0	0	0	0	0	67680.2	0	0	0	0	0	0	0	0	0	0	0	0	0	0	0	0	0	0	0	0	0	0	0	0	0	0	0	0	0	0	0	0	0
P	2089	118.013	8.93799	C3H3NO4	117.005					0	0	0	0	0	0	0	95329.5	96110.5	83717.7	71957.4	0	0	0	31717.6	0	0	0	0	0	21726	27066.1	20278.4	0	28332	0	9585.85	0	2008.22	0	0	0	0	8809.66	0	0	9307.65	0	0	0
P	261	118.016	8.91301	C2H4N3OP	117.009					0	215179	185031	198208	215816	0	0	0	0	0	0	0	0	0	0	0	0	0	0	0	0	0	0	0	0	0	0	0	0	0	0	0	0	0	0	0	0	0	0	0
P	1025	118.018	8.9253	CH3N5S	117.011					0	0	0	0	0	236664	283748	0	0	0	0	240643	220660	0	0	0	0	0	0	0	67513.9	0	0	0	0	0	0	0	0	0	0	0	0	0	0	0	0	0	0	0
P	1887	118.02	8.89997		117.012					0	0	0	0	0	0	0	330953	333703	299215	276063	0	0	0	78777.4	0	0	0	0	0	0	74388.4	70491.7	976.349	72716.5	0	22830.4	0	22724.5	0	0	0	0	21066.4	0	0	21728.5	0	0	0
P	2971	118.021	8.92113		117.013					0	0	0	0	0	0	0	0	322212	0	0	0	0	0	84703.1	86184.9	0	0	0	0	0	0	0	100417	0	0	0	0	22724.5	0	0	0	0	0	0	0	21728.5	0	0	0
P	175	118.023	8.91701		117.016					0	449693	457354	466779	490114	0	0	0	0	0	0	0	0	0	0	0	96941	104555	0	0	0	0	0	0	0	0	0	0	0	0	0	0	0	0	0	0	0	0	0	0
P	959	118.025	8.92515	C2H3N3O3	117.018					0	0	0	0	0	491033	514253	0	0	0	0	484905	448928	103743	0	0	0	0	108319	113478	118805	0	0	0	0	0	0	0	0	0	0	0	0	0	0	0	0	0	0	0
P	6537	118.026	6.3878		117.019					0	0	0	0	0	0	0	2457.45	2344.14	2929.73	3193.09	0	0	0	2695.26	0	0	0	0	0	3139.13	5334.79	2802.61	2806.2	6597.48	0	7837.98	0	0	0	0	0	0	8741.02	0	0	6829.57	0	0	0
P	1844	118.027	8.90036		117.019					0	0	0	0	0	0	0	565130	514112	513270	502526	0	0	0	114497	0	0	0	0	0	0	115139	113163	1320.33	110918	0	36316	0	34251.1	0	0	0	0	33031.3	0	0	32591.7	0	0	0
P	2935	118.028	8.92113	CH4N5P	117.02					0	0	0	0	0	0	0	0	483383	0	0	0	0	0	118800	110185	0	0	0	0	0	0	0	114294	0	0	0	0	34251.1	0	0	0	0	0	0	0	32591.7	0	0	0
P	6072	118.029	6.35633	C7H3NO	117.022					0	0	0	0	0	0	0	0	0	0	0	0	0	0	0	0	0	0	0	0	0	0	0	0	0	0	0	0	0	0	0	0	0	0	0	0	0	0	0	129415
P	171	118.03	8.91701		117.023					0	461304	529193	518730	520219	0	0	0	0	0	0	0	0	0	0	0	114537	112223	0	0	0	0	0	0	0	0	0	0	0	0	0	0	0	0	0	0	0	0	0	0
P	5711	118.031	6.35775		117.024					0	0	0	0	0	0	0	0	0	0	0	0	0	0	0	0	0	0	0	0	0	0	0	0	0	0	0	0	0	0	0	0	0	0	0	0	0	0	126690	0
P	957	118.032	8.92515	C4H7NOS	117.024					0	0	0	0	0	477677	481061	0	0	0	0	458132	459874	100486	0	0	0	0	108203	112362	107114	0	0	0	0	0	0	0	0	0	0	0	0	0	0	0	0	0	0	0
P	1853	118.033	8.90436		117.026					0	0	0	0	0	0	0	438071	422096	433095	449326	0	0	0	91717.9	0	0	0	0	0	0	96839	99812.4	966.538	91125.5	0	32853.1	0	27722.3	0	0	0	0	29457.2	0	0	29646.9	0	0	0
P	2972	118.034	8.92322		117.027					0	0	0	0	0	0	0	0	408339	0	0	0	0	0	96276.2	83195.4	0	0	0	0	0	0	0	77670.6	0	0	0	0	27722.3	0	0	0	0	0	0	0	29646.9	0	0	0
P	216	118.037	8.91979		117.03					0	295213	375709	350936	335679	0	0	0	0	0	0	0	0	0	0	0	78418.5	73243.8	0	0	0	0	0	0	0	0	0	0	0	0	0	0	0	0	0	0	0	0	0	0
P	999	118.039	8.92515		117.031					0	0	0	0	0	298695	286123	0	0	0	0	275015	300497	63529.4	0	0	0	0	71092.6	72866.3	65748.8	0	0	0	0	0	0	0	0	0	0	0	0	0	0	0	0	0	0	0
P	1906	118.04	8.93715	C6H3N3	117.033	2.01482	1H-Pyrrole-2,5-dicarboxylic acid; Dinitrile	C6H3N3		0	0	0	0	0	0	0	259870	249983	258989	262427	0	0	0	59931.1	0	0	0	0	0	71862.1	64664.8	61726.5	0	59505	0	20404.9	0	4115.37	0	0	0	0	17774.8	0	0	19890.5	0	0	0
P	298	118.044	8.91718	C3H7N3S	117.037					0	165562	214530	198644	184729	0	0	0	0	0	0	0	0	0	0	0	0	0	0	0	0	0	0	0	0	0	0	0	0	0	0	0	0	0	0	0	0	0	0	0
P	1072	118.045	8.92553		117.038					0	0	0	0	0	171124	162152	0	0	0	0	157073	166305	0	0	0	0	0	0	0	0	0	0	0	0	0	0	0	0	0	0	0	0	0	0	0	0	0	0	0
P	1988	118.047	8.93715	H3N7O	117.04					0	0	0	0	0	0	0	148153	141690	149532	149776	0	0	0	36263.1	0	0	0	0	0	43523.1	35815.3	37642	0	35576.4	0	15552.7	0	3433.73	0	0	0	0	10551.9	0	0	13424.1	0	0	0
P	454	118.051	8.91718	C4H7NO3	117.044					0	92436.3	116944	109276	103179	0	0	0	0	0	0	0	0	0	0	0	0	0	0	0	0	0	0	0	0	0	0	0	0	0	0	0	0	0	0	0	0	0	0	0
P	1211	118.052	8.92553	C3H8N3P	117.045					0	0	0	0	0	92391	85188.8	0	0	0	0	84017.8	90320.2	0	0	0	0	0	0	0	0	0	0	0	0	0	0	0	0	0	0	0	0	0	0	0	0	0	0	0
P	2148	118.054	8.99219		117.047					0	0	0	0	0	0	0	73141.4	71440.3	76708.9	79675.7	0	0	0	20381.6	0	0	0	0	0	25491.3	19607.7	23601	0	20713.2	0	10693.5	0	3943.14	0	0	0	0	8328.8	0	0	10145.7	0	0	0
P	2555	118.081	16.6366		117.074					0	0	0	0	0	14425.1	13060.8	15803.4	0	4517.87	297321	17762.9	0	13065.4	0	0	0	0	0	13348.3	22276.4	13935.3	18364.4	0	0	0	24790.3	0	4575.13	0	0	0	0	18729.9	0	0	13097.2	0	0	0
P	6598	119.072	10.4104		118.065					0	0	0	0	0	0	0	0	0	0	0	0	0	0	0	0	0	0	0	0	0	0	0	0	0	0	0	0	0	0	0	0	0	0	0	0	0	0	0	0
P	6389	119.073	10.3401	C4H11N2P	118.066					0	0	0	0	0	0	0	3471.98	1570.06	1468.53	3115.86	0	0	0	4007.11	0	0	0	0	0	0	1713.63	3120.9	1335.46	4131.51	0	70602.1	0	69262.3	0	0	0	0	61749.9	0	0	56465.4	0	0	0
P	4556	119.076	10.3809		118.068					0	0	0	0	0	0	0	0	0	0	0	0	0	0	0	0	0	0	0	0	0	0	0	0	0	0	0	0	0	0	78386.2	77029.5	0	0	0	0	0	0	0	104109
P	3717	119.077	10.3771		118.07					0	0	0	0	0	0	0	0	0	0	0	0	0	0	0	0	0	0	0	0	0	0	0	0	0	86079.1	0	77806.2	0	90915	0	0	85956.3	0	79531.2	0	0	0	119594	0
P	5168	119.079	10.4071	H6N8	118.072					0	0	0	0	0	0	0	0	0	0	0	0	0	0	0	0	0	0	0	0	0	0	0	0	0	0	0	0	0	0	0	0	0	0	0	0	0	128861	0	0
P	4013	119.08	10.3499		118.073					0	0	0	0	0	0	0	3489.52	1703.66	2467.83	1671.58	0	0	0	5737.65	0	0	0	0	0	0	1666.59	5373.31	2424.89	4660.06	0	94178.7	0	92760.6	0	0	0	0	86978.5	0	0	80169.7	0	0	0
P	4546	119.082	10.3834	C4H10N2O2	118.075					0	0	0	0	0	0	0	0	0	0	0	0	0	0	0	0	0	0	0	0	0	0	0	0	0	0	0	0	0	0	90111.7	91712.6	0	0	0	85566.3	0	0	0	138926
P	3699	119.084	10.3771		118.077					0	0	0	0	0	0	0	0	0	0	0	0	0	0	0	0	0	0	0	0	0	0	0	0	0	92160.1	0	89312	0	92202.5	0	0	90770.3	0	89431	0	0	0	142712	0
P	5152	119.086	10.405	C9H10	118.078					0	0	0	0	0	0	0	0	0	0	0	0	0	0	0	0	0	0	0	0	0	0	0	0	0	0	0	0	0	0	0	0	0	0	0	0	0	137291	0	0
P	4778	119.087	10.3721	C9H10	118.079					0	0	0	0	0	0	2018.13	1790.8	0	1311.8	1461.45	3543.24	0	0	0	0	0	0	0	1131.23	1330.33	2498.51	5382.32	0	5208.7	0	83147.5	0	0	0	0	0	0	76180	0	0	75472	0	0	0
P	6284	119.087	10.3848		118.08					0	0	0	0	0	0	0	1790.8	3249.94	1311.8	0	0	0	0	3942.67	0	0	0	0	0	0	2498.51	5382.32	1368.96	5208.7	0	83147.5	0	81369	0	0	0	0	81015.4	0	0	75472	0	0	0
P	5910	119.09	10.4016	C6H14S	118.082					0	0	0	0	0	0	0	0	0	0	0	0	0	0	0	0	0	0	0	0	0	0	0	0	0	0	0	0	0	0	0	0	0	0	0	0	0	0	0	107247
P	5274	119.092	10.4049		118.084					0	0	0	0	0	0	0	0	0	0	0	0	0	0	0	0	0	0	0	0	0	0	0	0	0	0	0	0	0	0	0	0	0	0	0	0	0	91401.8	103985	0
P	6599	119.093	10.4105	C3H10N4O	118.086					0	0	0	0	0	0	0	0	0	0	0	0	0	0	0	0	0	0	0	0	0	0	0	0	0	0	0	0	0	0	0	0	0	0	0	0	0	0	0	0
P	5251	120.031	5.60689	C2H6N3OP	119.024					0	0	0	0	0	0	0	0	0	0	0	0	0	0	0	0	0	0	0	0	0	0	0	0	0	0	0	0	0	0	0	0	0	0	0	0	0	157065	134258	0
P	6579	120.033	5.60687	C2H6N3OP	119.025					0	0	0	0	0	0	0	0	0	0	0	0	0	0	0	0	0	0	0	0	0	0	0	0	0	0	0	0	0	0	0	0	0	0	0	0	0	0	0	0
P	6255	120.034	5.52102	CH5N5S	119.027					0	0	0	0	0	0	0	1122.62	2864.19	3603.12	3647.57	0	0	0	3118.5	0	0	0	0	0	0	2114.86	2310.18	1701.05	3645.18	0	95464.3	0	0	0	0	0	0	81273.7	0	0	81381.7	0	0	0
P	5830	120.036	5.5897		119.029					0	0	0	0	0	0	0	0	0	0	0	0	0	0	0	0	0	0	0	0	0	0	0	0	0	0	0	0	0	0	0	0	0	0	0	0	0	0	0	243228
P	5120	120.038	5.60133		119.031					0	0	0	0	0	0	0	0	0	0	0	0	0	0	0	0	0	0	0	0	0	0	0	0	0	0	0	0	0	0	0	0	0	0	0	0	0	263660	256659	0
P	6578	120.04	5.60687	C2H5N3O3	119.032					0	0	0	0	0	0	0	0	0	0	0	0	0	0	0	0	0	0	0	0	0	0	0	0	0	0	0	0	0	0	0	0	0	0	0	0	0	0	0	0
P	6221	120.041	5.63188	C2H5N3O3	119.034					0	0	0	0	0	0	0	3228.28	4884.11	2921.91	1668.58	0	0	0	2399.86	0	0	0	0	0	0	1757.79	2120.14	1830.8	1675.46	0	102996	0	0	0	0	0	0	103801	0	0	111976	0	0	0
P	5813	120.043	5.60637	CH6N5P	119.036					0	0	0	0	0	0	0	0	0	0	0	0	0	0	0	0	0	0	0	0	0	0	0	0	0	0	0	0	0	0	0	0	0	0	0	0	0	0	0	273630
P	5475	120.045	5.60699	C7H5NO	119.038					0	0	0	0	0	0	0	0	0	0	0	0	0	0	0	0	0	0	0	0	0	0	0	0	0	0	0	0	0	0	0	0	0	0	0	0	0	0	279667	0
P	5126	120.047	5.60684		119.039					0	0	0	0	0	0	0	0	0	0	0	0	0	0	0	0	0	0	0	0	0	0	0	0	0	0	0	0	0	0	0	0	0	0	0	0	0	251777	0	0
P	6260	120.048	5.52593	C4H9NOS	119.04					0	0	0	0	0	0	0	2157.28	2310.92	1689.8	1244.3	0	0	0	1012.87	0	0	0	0	0	0	1711.75	4121.75	1485.39	951.19	0	71457.7	0	0	0	0	0	0	78787.6	0	0	88796.1	0	0	0
P	5880	120.05	5.59804		119.043					0	0	0	0	0	0	0	0	0	0	0	0	0	0	0	0	0	0	0	0	0	0	0	0	0	0	0	0	0	0	0	0	0	0	0	0	0	0	0	195677
P	5562	120.052	5.60699	CH5N5O2	119.045					0	0	0	0	0	0	0	0	0	0	0	0	0	0	0	0	0	0	0	0	0	0	0	0	0	0	0	0	0	0	0	0	0	0	0	0	0	0	184479	0
P	5230	120.054	5.60684		119.046					0	0	0	0	0	0	0	0	0	0	0	0	0	0	0	0	0	0	0	0	0	0	0	0	0	0	0	0	0	0	0	0	0	0	0	0	0	162015	0	0
P	6466	120.055	5.61029	C6H5N3	119.047					0	0	0	0	0	0	0	3796.28	3689.34	2530.34	1905.65	0	0	0	2033.43	0	0	0	0	0	0	1367.58	2337.57	1200.01	1753.03	0	28106.1	0	0	0	0	0	0	49800.8	0	0	57204.9	0	0	0
P	3425	120.069	8.32103	C3H10N3P	119.062					0	0	0	0	0	0	0	55031.6	51324.9	0	0	0	0	0	68026.9	71635.7	0	0	0	0	0	64048.9	0	77374.7	64070.1	0	70888.6	0	71393.4	0	0	0	0	59724.6	0	0	60322	0	0	0
P	6703	120.071	8.34237		119.063					0	0	0	0	0	0	0	0	0	0	0	0	0	0	0	0	0	0	0	0	0	0	0	0	0	0	0	0	0	0	0	0	0	0	0	0	0	0	0	0
P	3119	120.072	8.31552		119.065					0	0	0	0	0	0	0	0	0	0	0	0	0	0	0	0	73160.2	78546.6	0	0	0	0	0	0	0	78995.3	0	80186.4	0	0	107535	74950.7	0	0	0	0	0	0	0	126879
P	6748	120.073	9.00932		119.066					0	0	0	0	0	0	0	0	0	0	0	0	0	0	0	0	0	0	0	0	0	0	0	0	0	0	0	0	0	0	0	0	0	0	0	0	0	0	0	0
P	2700	120.074	8.3234		119.066					0	0	0	0	0	0	0	0	0	0	0	0	0	81508.2	0	0	0	0	120356	80780	84549.8	0	0	0	0	0	0	0	0	80489.3	0	0	114531	0	109706	0	0	145441	131123	0
P	5344	120.074	9.00605		119.067					0	0	0	0	0	0	0	0	0	0	0	0	0	0	0	0	0	0	0	0	0	0	0	0	0	0	0	0	0	0	0	0	0	0	0	0	0	98283.7	0	0
P	6580	120.075	8.34226		119.067					0	0	0	0	0	0	0	0	0	0	0	0	0	0	0	0	0	0	0	0	0	0	0	0	0	0	0	0	0	0	0	0	0	0	0	0	0	0	0	0
P	6443	120.076	8.97634		119.068					0	0	0	0	0	0	0	52777.8	50658.4	53041.8	51267.5	0	0	0	66409.4	0	0	0	0	0	0	63401	63293.3	47184.7	58715.9	0	52143.1	0	57198.1	0	0	0	0	60798.8	0	0	59177.3	0	0	0
P	2179	120.076	8.32985	C3H9N3O2	119.068					0	0	0	0	0	0	0	73778.8	67415.6	68028.3	67550.5	0	0	0	91859	0	0	0	0	0	0	89287.4	90339	89240.1	80225.6	0	117335	0	9676.8	0	0	0	0	120491	0	0	80374.6	0	0	0
P	2985	120.077	8.32497	C3H9N3O2	119.07					0	0	0	0	0	0	0	0	0	0	0	0	0	0	0	84437.4	0	0	0	0	0	0	0	85097.1	0	0	0	0	127641	0	0	0	0	0	0	77632.3	0	0	0	0
P	5980	120.078	9.00059		119.071					0	0	0	0	0	0	0	0	0	0	0	0	0	0	0	0	0	0	0	0	0	0	0	0	0	0	0	0	0	0	0	0	0	0	0	0	0	0	0	105656
P	665	120.079	8.31847		119.072					0	0	111033	69372	0	0	0	0	0	0	0	0	0	0	0	0	84303.4	119958	0	0	0	0	0	0	0	81500	0	112521	0	0	114944	80245.9	0	0	0	0	0	0	0	161290
P	5327	120.081	9.00117	C8H9N	119.073					0	0	0	0	0	0	0	0	0	0	0	0	0	0	0	0	0	0	0	0	0	0	0	0	0	0	0	0	0	0	0	0	0	0	0	0	0	103716	101707	0
P	2710	120.081	8.32367	C8H9N	119.073					0	0	0	0	0	0	0	0	0	0	0	0	0	115855	0	0	0	0	82334.6	78157.9	79233.2	0	0	0	0	0	0	0	0	72191.2	0	0	118767	0	78694.2	0	0	156908	153784	0
P	6554	120.082	9.01973		119.075					0	0	0	0	0	0	2051.74	45632	0	45195	46578.4	44396.6	0	0	54897.5	0	0	0	0	0	59286.8	54174.6	56614.1	0	49726.4	0	45325.9	0	0	0	0	0	0	51640	0	0	51593.8	0	0	0
P	2848	120.083	8.32983		119.075					0	0	0	0	0	0	0	69801.9	63545.2	62532.2	62853.7	0	0	0	76800.4	0	0	0	0	0	82855.8	74390	78785.6	0	68340.5	0	65573.2	0	0	0	0	0	0	70003.3	0	0	70517.4	0	0	0
P	5948	120.085	8.33343	C5H13NS	119.078					0	0	0	0	0	0	0	0	0	0	0	0	0	0	0	0	0	0	0	0	0	0	0	0	0	0	0	0	0	0	0	0	0	0	0	0	0	0	0	127173
P	5329	120.087	8.32564	C2H9N5O	119.08					0	0	0	0	0	0	0	0	0	0	0	0	0	0	0	0	0	0	0	0	0	0	0	0	0	0	0	0	0	0	0	0	0	0	0	0	0	78517.3	114053	0
P	6604	122.043	8.05839		121.036					0	0	0	0	0	0	0	0	0	0	0	0	0	0	0	0	0	0	0	0	0	0	0	0	0	0	0	0	0	0	0	0	0	0	0	0	0	0	0	0
P	3312	122.043	10.1479		121.036					0	0	0	0	0	0	1810	1354.63	0	2342.41	2830.86	1841.39	0	0	0	0	0	0	0	70398.5	83380.9	98648	94943.7	0	0	0	0	0	0	0	0	0	0	2840.92	0	0	5161.73	0	0	0
P	6312	122.044	8.04335		121.037					0	0	0	0	0	0	0	3827.36	4473.58	2719.34	2840.53	0	0	0	10812	0	0	0	0	0	8637.46	14346.5	10363.7	0	9346.31	0	24507.7	0	0	0	0	0	0	22108	0	0	23942	0	0	0
P	2809	122.044	10.1462	C3H7NO4	121.037					0	0	0	0	0	0	0	1354.63	2998.39	2342.41	0	0	0	0	105735	0	0	0	0	0	0	99602.6	103177	150579	97384.3	0	2436.03	0	7277.1	0	0	0	0	2840.92	0	0	5161.73	0	0	0
P	2953	122.046	10.2586	C4H3N5	121.038					0	0	0	0	0	0	0	0	0	0	0	0	0	0	0	127391	0	0	0	0	0	0	0	147317	0	0	0	0	0	0	0	0	0	0	0	0	0	0	0	0
P	5869	122.046	8.04988	C4H3N5	121.039					0	0	0	0	0	0	0	0	0	0	0	0	0	0	0	0	0	0	0	0	0	0	0	0	0	0	0	0	0	0	0	0	0	0	0	0	0	0	0	124380
P	3057	122.048	10.2675	C2H8N3OP	121.04					0	0	0	0	0	0	0	0	0	0	0	0	0	0	0	0	138901	166418	0	0	0	0	0	0	0	0	0	0	0	0	0	0	0	0	0	0	0	0	0	0
P	5109	122.048	8.04761	C2H8N3OP	121.041					0	0	0	0	0	0	0	0	0	0	0	0	0	0	0	0	0	0	0	0	0	0	0	0	0	0	0	0	0	0	0	0	0	0	0	0	0	168720	133471	0
P	2625	122.049	10.2673	CH7N5S	121.042					0	0	0	0	0	0	0	0	0	0	0	0	0	192862	0	0	0	0	157198	163669	188641	0	0	0	0	0	0	0	0	0	0	0	0	0	0	0	0	0	0	0
P	6575	122.05	8.05455	CH7N5S	121.042					0	0	0	0	0	0	0	0	0	0	0	0	0	0	0	0	0	0	0	0	0	0	0	0	0	0	0	0	0	0	0	0	0	0	0	0	0	0	0	0
P	6176	122.051	8.02766		121.044					0	0	0	0	0	0	0	9438.22	6829.78	9083.9	6619.54	0	0	0	18828.4	0	0	0	0	0	19208.5	20560.6	17392.9	0	22291.7	0	44254.1	0	0	0	0	0	0	45340.9	0	0	39459.9	0	0	0
P	2758	122.051	10.1852		121.044					0	0	0	0	0	0	0	3144.21	2267.26	3180.1	2700.34	0	0	0	218863	0	0	0	0	0	0	194604	197860	0	189120	0	6639.05	0	4651.34	0	0	0	0	3084.58	0	0	4160.4	0	0	0
P	2904	122.053	10.2586		121.045					0	0	0	0	0	0	0	0	0	0	0	0	0	0	0	231367	0	0	0	0	0	0	0	217031	0	0	0	0	0	0	0	0	0	0	0	0	0	0	0	0
P	5785	122.053	8.04988		121.046					0	0	0	0	0	0	0	0	0	0	0	0	0	0	0	0	0	0	0	0	0	0	0	0	0	0	0	0	0	0	0	0	0	0	0	0	0	0	0	255712
P	3035	122.055	10.2675		121.047					0	0	0	0	0	0	0	0	0	0	0	0	0	0	0	0	230564	249396	0	0	0	0	0	0	0	0	0	0	0	0	0	0	0	0	0	0	0	0	0	0
P	5064	122.055	8.04761	C2H7N3O3	121.048					0	0	0	0	0	0	0	0	0	0	0	0	0	0	0	0	0	0	0	0	0	0	0	0	0	0	0	0	0	0	0	0	0	0	0	0	0	287174	268539	0
P	2619	122.056	10.2673	C2H7N3O3	121.049					0	0	0	0	0	0	0	0	0	0	0	0	0	252522	0	0	0	0	217698	216621	233164	0	0	0	0	0	0	0	0	0	0	0	0	0	0	0	0	0	0	0
P	6572	122.057	8.05455	C2H7N3O3	121.05					0	0	0	0	0	0	0	0	0	0	0	0	0	0	0	0	0	0	0	0	0	0	0	0	0	0	0	0	0	0	0	0	0	0	0	0	0	0	0	0
P	6165	122.058	8.02766		121.051					0	0	0	0	0	0	0	11894.5	6422.21	7027.02	7875.03	0	0	0	19585.8	0	0	0	0	0	20844.3	23291.2	25449.6	0	20214.3	0	42578.8	0	0	0	0	0	0	45264.1	0	0	54366.1	0	0	0
P	2757	122.058	10.1107	CH8N5P	121.051					0	0	0	0	0	0	0	2932.52	3478.35	5022.57	4187.37	0	0	0	227591	0	0	0	0	0	0	218647	233385	0	199432	0	5298.15	0	4638.08	0	0	0	0	3527.83	0	0	12582.6	0	0	0
P	2909	122.06	10.2586	C7H7NO	121.052					0	0	0	0	0	0	0	0	0	0	0	0	0	0	0	216336	0	0	0	0	0	0	0	183784	0	0	0	0	0	0	0	0	0	0	0	0	0	0	0	0
P	5782	122.06	8.04988	C7H7NO	121.053	1.81882	2-Acetylpyridine	C7H7NO	Present in coriander seed and black tea	0	0	0	0	0	0	0	0	0	0	0	0	0	0	0	0	0	0	0	0	0	0	0	0	0	0	0	0	0	0	0	0	0	0	0	0	0	0	0	400426
P	3040	122.062	10.2675		121.054					0	0	0	0	0	0	0	0	0	0	0	0	0	0	0	0	213096	205420	0	0	0	0	0	0	0	0	0	0	0	0	0	0	0	0	0	0	0	0	0	0
P	5073	122.062	8.04761	C4H11NOS	121.055					0	0	0	0	0	0	0	0	0	0	0	0	0	0	0	0	0	0	0	0	0	0	0	0	0	0	0	0	0	0	0	0	0	0	0	0	0	294676	286079	0
P	2627	122.063	10.2673	C4H11NOS	121.056	-0.1011	3-(Methylthio)propylamine; S-Oxide(R-)	C4H11NOS	Found in Iberis amara	0	0	0	0	0	0	0	0	0	0	0	0	0	187194	0	0	0	0	174606	163040	173236	0	0	0	0	0	0	0	0	0	0	0	0	0	0	0	0	0	0	0
P	6577	122.064	8.05455	C4H11NOS	121.057					0	0	0	0	0	0	0	0	0	0	0	0	0	0	0	0	0	0	0	0	0	0	0	0	0	0	0	0	0	0	0	0	0	0	0	0	0	0	0	0
P	6205	122.065	8.01725		121.058					0	0	0	0	0	0	0	9931.72	4976.53	7475.83	6207.14	0	0	0	14138	0	0	0	0	0	17631.2	18198.4	15857.1	705.705	15174.2	0	27022.3	0	0	0	0	0	0	38017.7	0	0	57089.5	0	0	0
P	2774	122.065	10.1596		121.058					0	0	0	0	0	0	0	2769.82	3921.97	2281.73	3011.65	0	0	0	151720	0	0	0	0	0	0	146028	166400	0	132783	0	2775.19	0	2320.76	0	0	0	0	4661.79	0	0	12457.6	0	0	0
P	2940	122.067	10.2586	CH7N5O2	121.059					0	0	0	0	0	0	0	0	0	0	0	0	0	0	0	141748	0	0	0	0	0	0	0	104852	0	0	0	0	0	0	0	0	0	0	0	0	0	0	0	0
P	5817	122.067	8.04988	CH7N5O2	121.06					0	0	0	0	0	0	0	0	0	0	0	0	0	0	0	0	0	0	0	0	0	0	0	0	0	0	0	0	0	0	0	0	0	0	0	0	0	0	0	283112
P	3060	122.069	10.2675		121.061					0	0	0	0	0	0	0	0	0	0	0	0	0	0	0	0	130922	123345	0	0	0	0	0	0	0	0	0	0	0	0	0	0	0	0	0	0	0	0	0	0
P	5136	122.07	8.04761		121.062					0	0	0	0	0	0	0	0	0	0	0	0	0	0	0	0	0	0	0	0	0	0	0	0	0	0	0	0	0	0	0	0	0	0	0	0	0	192755	189265	0
P	2665	122.07	10.2673	C6H7N3	121.063					0	0	0	0	0	0	0	0	0	0	0	0	0	141360	0	0	0	0	105631	97909.2	102071	0	0	0	0	0	0	0	0	0	0	0	0	0	0	0	0	0	0	0
P	6581	122.071	8.05455	C6H7N3	121.064					0	0	0	0	0	0	0	0	0	0	0	0	0	0	0	0	0	0	0	0	0	0	0	0	0	0	0	0	0	0	0	0	0	0	0	0	0	0	0	0
P	6277	122.072	7.99823	C6H7N3	121.065					0	0	0	0	0	0	0	5041.54	8386.3	8930.34	7150.9	0	0	0	6486.36	0	0	0	0	0	16423	12472.6	11373.3	0	10253.7	0	19223.2	0	0	0	0	0	0	31300.9	0	0	38850	0	0	0
P	2829	122.072	10.0918	C4H12NOP	121.065					0	0	0	0	0	0	0	11119.8	14135.4	4525.29	3895.45	0	0	0	118972	0	0	0	0	0	0	87309.9	97306.7	0	77810.5	0	6013.24	0	4975.15	0	0	0	0	6658.65	0	0	9895.05	0	0	0
P	2989	122.074	10.2753	C3H11N3S	121.067					0	0	0	0	0	0	0	0	0	0	0	0	0	0	0	115864	0	0	0	0	0	0	0	0	0	0	0	0	0	0	0	0	0	0	0	0	0	0	0	0
P	5937	122.074	8.04988	C3H11N3S	121.067					0	0	0	0	0	0	0	0	0	0	0	0	0	0	0	0	0	0	0	0	0	0	0	0	0	0	0	0	0	0	0	0	0	0	0	0	0	0	0	156528
P	3123	122.075	10.2591	C3H11N3S	121.068					0	0	0	0	0	0	0	0	0	0	0	0	0	0	0	0	98384	0	0	0	0	0	0	0	0	0	0	0	0	0	0	0	0	0	0	0	0	0	0	0
P	5299	122.077	8.04761		121.069					0	0	0	0	0	0	0	0	0	0	0	0	0	0	0	0	0	0	0	0	0	0	0	0	0	0	0	0	0	0	0	0	0	0	0	0	0	146634	121952	0
P	566	122.084	9.57988	C3H12N3P	121.076					0	79137.9	0	0	122197	110471	0	0	0	0	0	0	85409.8	0	0	0	0	0	0	0	0	0	0	0	0	0	0	0	0	0	0	0	0	0	0	0	0	0	0	0
P	1718	122.085	9.57587	C3H12N3P	121.078					0	0	0	0	0	0	117657	0	0	0	98713.3	99468.5	0	0	0	0	0	0	0	0	0	0	0	0	0	0	0	0	0	0	0	0	0	0	0	0	0	0	0	0
P	2100	122.086	9.55817		121.079					0	0	0	0	0	0	0	125149	111436	103286	88436.9	0	0	0	16799.3	0	0	0	0	0	0	20860.7	13590.8	0	13328	0	5806.29	0	5456.18	0	0	0	0	7685.13	0	0	14737.3	0	0	0
P	421	122.09	9.57599		121.083					0	169647	175162	151955	205712	0	0	0	0	0	0	0	0	0	0	0	0	0	0	0	0	0	0	0	0	0	0	0	0	0	0	0	0	0	0	0	0	0	0	0
P	1186	122.091	9.57599		121.084					0	0	0	0	0	162913	182600	0	0	0	0	140155	133578	0	0	0	0	0	0	0	0	0	0	0	0	0	0	0	0	0	0	0	0	0	0	0	0	0	0	0
P	2058	122.093	9.5709	C3H11N3O2	121.086					0	0	0	0	0	0	0	220630	186889	155638	168958	0	0	0	19941.4	0	0	0	0	0	18318.1	19554.6	29869.7	0	10907.1	0	12562.2	0	0	0	0	0	0	10354.1	0	0	9777.02	0	0	0
P	482	122.097	9.57599	C8H11N	121.09					0	84196.5	95592.4	90562.2	93480.9	0	0	0	0	0	0	0	0	0	0	0	0	0	0	0	0	0	0	0	0	0	0	0	0	0	0	0	0	0	0	0	0	0	0	0
P	1242	122.098	9.57599		121.091					0	0	0	0	0	91688.7	92444.3	0	0	0	0	85952.1	90008	0	0	0	0	0	0	0	0	0	0	0	0	0	0	0	0	0	0	0	0	0	0	0	0	0	0	0
P	2144	122.1	9.56501	C5H15NS	121.093					0	0	0	0	0	0	0	78017.6	78316.6	83672.3	90549.1	0	0	0	12253.8	0	0	0	0	0	17544.1	20162.4	7174.1	0	11797.5	0	14190.4	0	0	0	0	0	0	3979.96	0	0	6428.12	0	0	0
P	3011	125.067	4.87205	CH8N4O3	124.06					0	0	0	0	0	0	0	0	0	0	0	0	0	0	0	233054	0	0	0	0	0	0	0	0	0	0	0	0	0	0	0	0	0	0	0	0	0	0	0	0
P	6071	126.046	1.53674		125.038					0	0	0	0	0	0	0	0	0	0	0	0	0	0	0	0	0	0	0	0	0	0	0	0	0	0	0	0	0	0	0	0	0	0	0	0	0	0	0	58037.8
P	5286	126.048	1.53714		125.041					0	0	0	0	0	0	0	0	0	0	0	0	0	0	0	0	0	0	0	0	0	0	0	0	0	0	0	0	0	0	0	0	0	0	0	0	0	69990.9	0	0
P	6516	126.049	1.53688		125.042					0	0	0	0	0	0	0	0	0	0	0	0	0	0	0	0	0	0	0	0	0	0	0	0	0	0	0	0	0	0	0	0	0	0	0	0	0	0	0	0
P	4773	126.05	1.53534	C3H12NPS	125.043					0	0	0	0	0	0	0	0	25796.7	32104.4	0	0	0	0	48723.5	43889.2	0	0	0	0	0	43795.9	0	47393.5	45097	0	0	0	0	0	0	0	0	63225.3	0	0	62824.1	0	0	0
P	5940	126.053	1.53674	C2H3N7	125.046					0	0	0	0	0	0	0	0	0	0	0	0	0	0	0	0	0	0	0	0	0	0	0	0	0	0	0	0	0	0	0	0	0	0	0	0	0	0	0	72399.1
P	5624	126.054	1.53742	H8N5OP	125.047					0	0	0	0	0	0	0	0	0	0	0	0	0	0	0	0	0	0	0	0	0	0	0	0	0	0	0	0	0	0	0	0	0	0	0	0	0	0	71920.6	0
P	5291	126.055	1.53702	C6H7NO2	125.048	1.51673	3,4-Dihydroxy-2-methylpyridine	C6H7NO2	Prod. by Streptomyces sp. MJ 210	0	0	0	0	0	0	0	0	0	0	0	0	0	0	0	0	0	0	0	0	0	0	0	0	0	0	0	0	0	0	0	0	0	0	0	0	0	70594.7	0	0
P	3008	127.069	9.30807		126.062					0	0	0	0	0	0	0	0	0	0	0	0	0	0	0	79225.1	0	0	0	0	0	0	0	0	0	0	0	0	0	0	0	0	0	0	0	0	0	0	0	0
P	3162	127.071	9.32535	C2H10N2O4	126.064					0	0	0	0	0	0	0	0	0	0	0	0	0	0	0	0	0	80877.7	0	0	0	0	0	0	0	0	0	0	0	0	0	0	0	0	0	0	0	0	0	0
P	2713	127.072	9.31663	C3H6N6	126.065					0	0	0	0	0	0	0	0	0	0	0	0	0	83017	0	0	0	0	79469.2	0	0	0	0	0	0	0	0	0	0	0	0	0	0	0	0	0	0	0	0	0
P	6590	130.017	6.64099	CH7NO4S	129.01					0	0	0	0	0	0	0	0	0	0	0	0	0	0	0	0	0	0	0	0	0	0	0	0	0	0	0	0	0	0	0	0	0	0	0	0	0	0	0	0
P	6349	130.018	6.5849	C2H3N5S	129.011					0	0	0	0	0	0	65427.4	82990.8	0	77765.6	72944.3	69295.1	0	0	122827	0	0	0	0	820.505	98770.9	114722	108673	0	0	0	0	0	0	89534.9	0	0	0	116491	0	0	123336	0	0	0
P	3015	130.021	6.63359	H8N3OPS	129.013					0	0	0	0	0	0	0	0	0	0	0	0	0	0	0	137184	0	0	0	0	0	0	0	140337	0	0	0	0	0	0	0	0	0	0	0	147936	0	0	0	273736
P	3124	130.023	6.62739		129.015					0	0	0	0	0	0	0	0	0	0	0	0	0	0	0	0	147295	0	0	0	0	0	0	0	0	0	0	0	0	0	149992	160971	0	0	0	0	0	0	289166	0
P	3151	130.024	6.6199		129.016					0	0	0	0	0	0	0	0	0	0	0	0	0	0	0	0	0	162995	0	0	0	0	0	0	0	0	0	163619	0	0	0	0	0	0	178408	0	0	333745	0	0
P	2687	130.025	6.63165	C3H3N3O3	129.017	-1.39609	2,4-Imidazolidinedione; 1-Nitroso	C3H3N3O3		0	0	0	0	0	0	0	0	0	0	0	0	0	186346	0	0	0	0	167247	172667	178189	0	0	0	0	183738	0	0	0	165380	0	0	175839	0	0	0	0	0	0	0
P	2816	130.026	6.62237	CH8NO4P	129.019					0	0	0	0	0	0	0	134432	134031	126799	129937	0	0	0	196091	0	0	0	0	0	167658	196247	176780	0	171522	0	0	0	0	0	0	0	0	195777	0	0	198887	0	0	0
P	2976	130.028	6.62849	C2H4N5P	129.021					0	0	0	0	0	0	0	0	0	0	0	0	0	0	0	187242	0	0	0	0	0	0	0	179804	0	0	173917	0	178120	0	0	0	0	0	0	216736	0	0	0	365905
P	873	130.03	6.63241	H9N3OP2	129.023					0	0	0	0	158624	0	0	0	0	0	0	0	0	0	0	0	188970	197747	0	0	0	0	0	0	0	0	0	0	0	0	173143	187042	0	0	204957	0	0	0	352829	0
P	2688	130.032	6.6262	C5H7NOS	129.024					0	0	0	0	0	0	0	0	0	0	0	0	0	193031	0	0	0	0	178361	177584	172313	0	0	0	0	174051	0	160513	0	158064	0	0	183800	0	0	0	0	354521	0	0
P	2846	130.033	6.62109		129.026					0	0	0	0	0	0	0	122337	113735	116270	102302	0	0	0	161586	0	0	0	0	0	158495	172413	162586	0	145334	0	0	0	0	0	0	0	0	168263	0	0	172397	0	0	0
P	4915	130.035	6.63507	CH7NO6	129.028					0	0	0	0	0	0	0	0	0	0	0	0	0	0	0	0	0	0	0	0	0	0	0	0	0	0	0	0	0	0	0	0	0	0	0	158812	0	0	0	282408
P	5516	130.037	6.64111	H8N3O3P	129.03					0	0	0	0	0	0	0	0	0	0	0	0	0	0	0	0	0	0	0	0	0	0	0	0	0	0	0	0	0	0	0	0	0	0	0	0	0	0	249558	0
P	5171	130.039	6.63761		129.031					0	0	0	0	0	0	0	0	0	0	0	0	0	0	0	0	0	0	0	0	0	0	0	0	0	0	0	0	0	0	0	0	0	0	0	0	0	234902	0	0
P	6384	130.04	6.5849	C7H3N3	129.033	0.204882	2,3-Pyridinedicarboxylic acid; Dinitrile	C7H3N3		0	0	0	0	0	0	81103	75356.1	0	77518.7	62402.9	78558	0	0	99547.1	0	0	0	0	2662.19	103742	94900.8	89727.5	0	0	0	0	0	0	112279	0	0	0	93472.1	0	0	106329	0	0	0
P	6003	130.042	6.64048	C5H8NOP	129.035					0	0	0	0	0	0	0	0	0	0	0	0	0	0	0	0	0	0	0	0	0	0	0	0	0	0	0	0	0	0	0	0	0	0	0	0	0	0	0	163409
P	5713	130.044	6.62462		129.037					0	0	0	0	0	0	0	0	0	0	0	0	0	0	0	0	0	0	0	0	0	0	0	0	0	0	0	0	0	0	0	0	0	0	0	0	0	0	143263	0
P	545	130.117	9.355		129.11					0	130213	129526	126685	132880	0	0	0	0	0	0	0	0	0	0	0	0	0	0	0	0	0	0	0	0	0	0	0	0	0	0	0	0	0	0	0	0	0	0	0
P	1302	130.119	9.35501		129.112					0	0	0	0	0	129989	108697	0	0	0	0	125161	127036	0	0	0	0	0	0	0	0	0	0	0	0	0	0	0	0	0	0	0	0	0	0	0	0	0	0	0
P	2166	130.12	9.33062		129.113					0	0	0	0	0	0	0	131965	121116	113212	123299	0	0	0	38665.7	0	0	0	0	0	33441.7	41335.3	33360.9	0	34299.2	0	0	0	0	0	0	0	0	22915.6	0	0	21311.1	0	0	0
P	683	130.124	9.34255		129.117					0	0	123535	0	0	0	0	0	0	0	0	0	0	0	0	0	0	0	0	0	0	0	0	0	0	0	0	0	0	0	0	0	0	0	0	0	0	0	0	0
P	5939	134.036	8.59195	C4H8NO2P	133.029					0	0	0	0	0	0	0	0	0	0	0	0	0	0	0	0	0	0	0	0	0	0	0	0	0	0	0	0	0	0	0	0	0	0	0	0	0	0	0	95641.3
P	5496	134.038	8.59257	C3H7N3OS	133.031					0	0	0	0	0	0	0	0	0	0	0	0	0	0	0	0	0	0	0	0	0	0	0	0	0	0	0	0	0	0	0	0	0	0	0	0	0	0	142581	0
P	5090	134.04	8.58906		133.032					0	0	0	0	0	0	0	0	0	0	0	0	0	0	0	0	0	0	0	0	0	0	0	0	0	0	0	0	0	0	0	0	0	0	0	0	0	211242	0	0
P	6135	134.041	9.2695		133.034					2090.24	0	0	0	0	0	10214.9	0	0	13791.5	8993.36	11351.3	0	2520.15	0	0	0	0	0	1657.99	2647.12	0	2365.94	0	0	15601.9	0	0	0	11295.5	0	0	0	14056.5	0	0	11846.6	0	0	0
P	5752	134.044	8.59195		133.036					0	0	0	0	0	0	0	0	0	0	0	0	0	0	0	0	0	0	0	0	0	0	0	0	0	0	0	0	0	0	0	0	0	0	0	0	0	0	0	647999
P	5388	134.046	8.59257	C5H3N5	133.038					0	0	0	0	0	0	0	0	0	0	0	0	0	0	0	0	0	0	0	0	0	0	0	0	0	0	0	0	0	0	0	0	0	0	0	0	0	0	715562	0
P	5004	134.047	8.58906	C3H8N3OP	133.04					0	0	0	0	0	0	0	0	0	0	0	0	0	0	0	0	0	0	0	0	0	0	0	0	0	0	0	0	0	0	0	0	0	0	0	0	0	895010	0	0
P	6096	134.048	9.30389	C3H8N3OP	133.041					1224.94	0	0	0	0	0	25906.4	0	0	33437.7	27235.9	25774.2	0	4631.1	0	0	0	0	0	4344.63	6172.85	0	1661.08	0	0	30584.9	0	0	0	24090	0	0	0	29767.1	0	0	27154.5	0	0	0
P	5738	134.051	8.59195		133.044					0	0	0	0	0	0	0	0	0	0	0	0	0	0	0	0	0	0	0	0	0	0	0	0	0	0	0	0	0	0	0	0	0	0	0	0	0	0	0	1.36511e+06
P	5380	134.053	8.59257		133.046					0	0	0	0	0	0	0	0	0	0	0	0	0	0	0	0	0	0	0	0	0	0	0	0	0	0	0	0	0	0	0	0	0	0	0	0	0	0	1.37701e+06	0
P	4994	134.054	8.5924		133.047					0	0	0	0	0	0	0	0	0	0	0	0	0	0	0	0	0	0	0	0	0	0	0	0	0	0	0	0	0	0	0	0	0	0	0	0	0	1.49238e+06	0	0
P	6092	134.056	9.27053	C3H7N3O3	133.049	-1.5543	1,2-Hydrazinedicarboxylic acid; Amide-Me ester	C3H7N3O3		846.846	0	0	0	0	0	37771.4	0	0	38974	33327.1	33732	0	6145.59	0	0	0	0	0	5067.53	8007.98	0	5870.12	0	0	39003.8	0	0	0	30775.2	0	0	0	40957.8	0	0	34326.1	0	0	0
P	5736	134.058	8.59195	C2H8N5P	133.051					0	0	0	0	0	0	0	0	0	0	0	0	0	0	0	0	0	0	0	0	0	0	0	0	0	0	0	0	0	0	0	0	0	0	0	0	0	0	0	1.55387e+06
P	4995	134.061	8.58689	C8H7NO	133.053					0	0	0	0	0	0	0	0	0	0	0	0	0	0	0	0	0	0	0	0	0	0	0	0	0	0	0	0	0	0	0	0	0	0	0	0	0	1.46644e+06	1.43314e+06	0
P	6565	134.062	8.59661		133.055					0	0	0	0	0	0	0	0	0	0	0	0	0	0	0	0	0	0	0	0	0	0	0	0	0	0	0	0	0	0	0	0	0	0	0	0	0	0	0	0
P	6095	134.063	9.24656	C5H11NOS	133.056					662.662	0	0	0	0	0	33080.9	0	0	34671.1	25818.3	32665.7	0	6635.34	0	0	0	0	0	6088.23	6174.07	0	1695.61	0	0	28700.4	0	0	0	24530.5	0	0	0	36049	0	0	27672.5	0	0	0
P	5741	134.066	8.59195		133.058					0	0	0	0	0	0	0	0	0	0	0	0	0	0	0	0	0	0	0	0	0	0	0	0	0	0	0	0	0	0	0	0	0	0	0	0	0	0	0	1.11077e+06
P	5002	134.068	8.58689	C2H7N5O2	133.061					0	0	0	0	0	0	0	0	0	0	0	0	0	0	0	0	0	0	0	0	0	0	0	0	0	0	0	0	0	0	0	0	0	0	0	0	0	954652	968047	0
P	6567	134.069	8.59661		133.062					0	0	0	0	0	0	0	0	0	0	0	0	0	0	0	0	0	0	0	0	0	0	0	0	0	0	0	0	0	0	0	0	0	0	0	0	0	0	0	0
P	6110	134.071	9.27262	C7H7N3	133.063					1671.27	0	0	0	0	0	22745.3	0	0	23754.7	14280.7	20182.7	0	4754.52	0	0	0	0	0	5893.49	6104.79	0	5141.56	0	0	19791.4	0	0	0	16209.1	0	0	0	22250.6	0	0	19277.7	0	0	0
P	5749	134.073	8.59195	C5H12NOP	133.066	-0.441712	Pyrrolidine; N-(2-Chloroethyl)	C6H12ClN		0	0	0	0	0	0	0	0	0	0	0	0	0	0	0	0	0	0	0	0	0	0	0	0	0	0	0	0	0	0	0	0	0	0	0	0	0	0	0	617655
P	5397	134.075	8.59257	C4H11N3S	133.068					0	0	0	0	0	0	0	0	0	0	0	0	0	0	0	0	0	0	0	0	0	0	0	0	0	0	0	0	0	0	0	0	0	0	0	0	0	0	552019	0
P	5026	134.077	8.5924		133.069					0	0	0	0	0	0	0	0	0	0	0	0	0	0	0	0	0	0	0	0	0	0	0	0	0	0	0	0	0	0	0	0	0	0	0	0	0	491545	0	0
P	6137	134.078	9.28847	CH7N7O	133.071					1068.57	0	0	0	0	0	16450.9	0	0	15404.2	9485.11	13242.8	0	6720.95	0	0	0	0	2588.2	3354.92	4199.6	0	2295.32	0	0	13366.2	0	0	0	10727.8	0	0	0	13546.9	0	0	10317.5	0	0	0
P	5767	134.08	8.59195	C5H11NO3	133.073					0	0	0	0	0	0	0	0	0	0	0	0	0	0	0	0	0	0	0	0	0	0	0	0	0	0	0	0	0	0	0	0	0	0	0	0	0	0	0	339158
P	5428	134.082	8.59257		133.075					0	0	0	0	0	0	0	0	0	0	0	0	0	0	0	0	0	0	0	0	0	0	0	0	0	0	0	0	0	0	0	0	0	0	0	0	0	0	319191	0
P	5070	134.084	8.5924	C4H12N3P	133.077					0	0	0	0	0	0	0	0	0	0	0	0	0	0	0	0	0	0	0	0	0	0	0	0	0	0	0	0	0	0	0	0	0	0	0	0	0	255835	0	0
P	6211	134.085	8.77958		133.078					1235.73	0	0	0	0	0	3241.46	0	0	2920.04	3646.86	4391.64	0	5360.7	0	0	0	0	0	3402.59	4245.73	0	4130.43	0	0	4880.11	0	0	0	1962.86	0	0	0	3251.29	0	0	2590.2	0	0	0
P	5827	134.088	8.59195		133.081					0	0	0	0	0	0	0	0	0	0	0	0	0	0	0	0	0	0	0	0	0	0	0	0	0	0	0	0	0	0	0	0	0	0	0	0	0	0	0	168366
P	5525	134.09	8.59257	H7N9	133.083					0	0	0	0	0	0	0	0	0	0	0	0	0	0	0	0	0	0	0	0	0	0	0	0	0	0	0	0	0	0	0	0	0	0	0	0	0	0	133136	0
P	5238	134.091	8.58906		133.084					0	0	0	0	0	0	0	0	0	0	0	0	0	0	0	0	0	0	0	0	0	0	0	0	0	0	0	0	0	0	0	0	0	0	0	0	0	116875	0	0
P	5211	135.066	8.57555	C5H10O4	134.058	2.38241	3,4,5-Trihydroxy-2-pentanone; (3S,4R)-form	C5H10O4	Metab. of Streptomyces hygroscopicus. Intermed. in biosynth. of thiamine in Escherichia coli	0	0	0	0	0	0	0	0	0	0	0	0	0	0	0	0	0	0	0	0	0	0	0	0	0	0	0	0	0	0	0	0	0	0	0	0	0	121950	0	0
P	6035	136.063	8.28339	C3H10N3OP	135.056	0.250996	4-(Hydroxymethyl)benzenediazonium(1+)	C7H7N2O	Constit. of the edible mushroom Agaricus bisporus	0	0	0	0	0	0	0	0	0	0	0	0	0	0	0	0	0	0	0	0	0	0	0	0	0	0	0	0	0	0	0	0	0	0	0	0	0	0	0	79664.1
P	4671	136.065	8.28102	C2H9N5S	135.058					0	0	0	0	0	0	0	0	0	0	0	0	0	0	0	0	0	0	0	0	0	0	0	0	0	0	0	0	0	0	0	77315.2	0	0	0	0	0	0	130348	0
P	4710	136.066	8.27981		135.059					0	0	0	0	0	0	0	0	0	0	0	0	0	0	0	0	0	0	0	0	0	0	0	0	0	0	0	0	0	0	0	0	74527	0	0	0	0	134826	0	0
P	6601	136.067	10.2769		135.06					0	0	0	0	0	0	0	0	0	0	0	0	0	0	0	0	0	0	0	0	0	0	0	0	0	0	0	0	0	0	0	0	0	0	0	0	0	0	0	0
P	3704	136.067	8.27532		135.06					0	0	0	0	0	0	0	0	0	0	0	0	0	0	0	0	0	0	0	0	0	0	0	0	0	112524	0	79712.3	0	79254.5	0	0	0	0	0	0	0	0	0	0
P	6431	136.068	10.4354		135.061					883.883	0	0	0	0	19541.8	19042.9	0	0	22044.2	23184.9	26950.7	0	20855.8	0	0	0	0	18498.4	21923.8	21282.6	0	0	0	0	47809	0	0	0	48870.1	0	0	0	56513.3	0	0	52169.2	0	0	0
P	4768	136.069	8.32599		135.061					0	0	0	0	0	0	62504.3	68317.8	0	66989.6	66040.3	70322.6	0	0	27341.7	0	0	0	0	9774.1	31896.1	35801.5	34069.1	0	0	89717.2	0	0	0	85004.2	0	0	0	85052.3	0	0	80375.8	0	0	0
P	5942	136.071	10.2766		135.063					0	0	0	0	0	0	0	0	0	0	0	0	0	0	0	0	0	0	0	0	0	0	0	0	0	0	0	0	0	0	0	0	0	0	0	0	0	0	0	93045.6
P	4023	136.071	8.27526	C3H9N3O3	135.064					0	0	0	0	0	0	0	0	0	0	0	0	0	0	0	0	0	0	0	0	0	0	0	0	0	0	83021.3	0	85026.7	0	0	0	0	0	0	88581.8	0	0	0	151601
P	5621	136.073	10.2771	C3H9N3O3	135.065					0	0	0	0	0	0	0	0	0	0	0	0	0	0	0	0	0	0	0	0	0	0	0	0	0	0	0	0	0	0	0	0	0	0	0	0	0	0	93633.2	0
P	660	136.073	8.27549		135.066					0	0	76231.5	0	66547.5	0	0	0	0	0	0	0	0	0	0	0	0	0	0	0	0	0	0	0	0	0	0	0	0	0	84349.1	89041.9	83312.2	0	101410	0	0	149067	152755	0
P	5288	136.074	10.2737	C2H10N5P	135.067					0	0	0	0	0	0	0	0	0	0	0	0	0	0	0	0	0	0	0	0	0	0	0	0	0	0	0	0	0	0	0	0	0	0	0	0	0	92953.3	0	0
P	3727	136.075	8.2777	C2H10N5P	135.068					0	0	0	0	0	0	0	0	0	0	0	0	0	0	0	0	0	0	0	0	0	0	0	0	0	79906.7	0	82217.2	0	81180.6	0	0	0	0	0	0	0	0	0	0
P	6453	136.075	10.4315	C8H9NO	135.068	-1.92288	Phenylacetic acid; Amide	C8H9NO	Produced by Actinomyces spp., sponge Halichondria sp., Streptomyces alboniger, Streptoverticillium olivoreticuli, Tedania anhelans. Constit. of the leaves of Allophylus cobbe	996.496	0	0	0	0	21718.1	16468.1	0	0	18844.4	24070.7	28446.4	0	19125.8	0	0	0	0	19848.8	21669.7	18535.1	0	0	0	0	52327.1	0	0	0	45037.8	0	0	0	57294.2	0	0	49486.5	0	0	0
P	4772	136.076	8.32697	C8H9NO	135.069					0	0	0	0	0	0	60453	64683.1	0	60106.7	65511.2	72339.2	0	0	32034.6	0	0	0	0	8478.67	28835.1	29071.4	29820.7	0	0	83867.6	0	0	0	84951	0	0	0	81758	0	0	75900.6	0	0	0
P	4916	136.078	8.28632		135.071					0	0	0	0	0	0	0	0	0	0	0	0	0	0	0	0	0	0	0	0	0	0	0	0	0	0	0	0	0	0	0	0	0	0	0	72810	0	0	0	97392.8
P	6032	136.078	10.276	C5H13NOS	135.071					0	0	0	0	0	0	0	0	0	0	0	0	0	0	0	0	0	0	0	0	0	0	0	0	0	0	0	0	0	0	0	0	0	0	0	0	0	0	0	79328.7
P	5591	136.08	8.29233	C5H13NOS	135.073					0	0	0	0	0	0	0	0	0	0	0	0	0	0	0	0	0	0	0	0	0	0	0	0	0	0	0	0	0	0	0	0	0	0	0	0	0	0	126960	0
P	5248	136.082	8.28885		135.074					0	0	0	0	0	0	0	0	0	0	0	0	0	0	0	0	0	0	0	0	0	0	0	0	0	0	0	0	0	0	0	0	0	0	0	0	0	105171	0	0
P	6445	136.083	8.57529	C2H9N5O2	135.076					2489.48	0	0	0	0	0	45230.3	6513.28	0	39447.2	46479.7	47712.4	0	23290	0	0	0	0	0	8385.13	20507.6	0	22747.4	0	0	59881	0	0	0	54861.8	0	0	0	55887.2	0	0	44698.5	0	0	0
P	6595	137.064	5.61246	C5H12O2S	136.056					0	0	0	0	0	0	0	0	0	0	0	0	0	0	0	0	0	0	0	0	0	0	0	0	0	0	0	0	0	0	0	0	0	0	0	0	0	0	0	0
P	6442	137.065	5.91504	C5H14P2	136.057					961.961	0	0	0	0	0	1515.19	0	0	0	2611.88	1689.14	1856.92	1443.34	0	0	0	0	1785.49	1248.62	1683.12	0	0	0	0	57664.8	0	27408.6	0	57903.7	0	0	51743.2	0	0	0	46000.3	0	0	0
P	6000	137.067	5.5897	C2H8N4O3	136.06					0	0	0	0	0	0	0	0	0	0	0	0	0	0	0	0	0	0	0	0	0	0	0	0	0	0	0	0	0	0	0	0	0	0	0	0	0	0	0	145355
P	5665	137.069	5.60718	CH9N6P	136.062					0	0	0	0	0	0	0	0	0	0	0	0	0	0	0	0	0	0	0	0	0	0	0	0	0	0	0	0	0	0	0	0	0	0	0	0	0	0	150045	0
P	5347	137.071	5.60267	C7H8N2O	136.064	-0.179165	3-(1H-Pyrrol-3-yl)-2-propenoic acid; (E)-form, Amide	C7H8N2O	From Streptomyces parvulus	0	0	0	0	0	0	0	0	0	0	0	0	0	0	0	0	0	0	0	0	0	0	0	0	0	0	0	0	0	0	0	0	0	0	0	0	0	140200	0	0
P	3263	137.102	1.87083		136.095					0	0	0	0	0	0	0	0	0	0	0	0	0	0	0	0	0	0	0	73982.5	0	0	0	0	0	0	0	0	0	0	0	0	0	0	0	0	0	0	0	0
P	3017	137.105	1.87032		136.098					0	0	0	0	0	0	0	0	0	0	0	0	0	0	0	68614.2	0	0	0	0	0	0	0	0	0	0	0	0	0	0	0	0	0	0	0	0	0	0	0	0
P	2720	138.043	8.92489	C2H8N3O2P	137.035					0	0	0	0	0	0	0	0	0	0	0	0	0	85022.6	0	0	0	0	69507.9	77693.8	0	0	0	0	0	0	0	0	0	0	0	0	0	0	0	0	0	0	0	0
P	2813	138.044	8.60066	CH7N5OS	137.037					0	0	0	0	0	0	0	10078.4	19953.6	20336.4	5374.76	0	0	0	113529	0	0	0	0	0	77136.4	87528.8	89928.2	0	93398.5	0	0	0	0	0	0	0	0	19433	0	0	8314.44	0	0	0
P	2964	138.046	8.93276	C7H8NP	137.039					0	0	0	0	0	0	0	0	0	0	0	0	0	0	0	109207	0	0	0	0	0	0	0	119390	0	0	0	0	0	0	0	0	0	0	0	0	0	0	0	0
P	3072	138.048	8.9249		137.04					0	0	0	0	0	0	0	0	0	0	0	0	0	0	0	0	108514	0	0	0	0	0	0	0	0	0	0	0	0	0	0	0	0	0	0	0	0	0	0	0
P	2658	138.049	8.92484	C4H12NPS	137.042					0	0	0	0	0	0	0	0	0	0	0	0	0	147884	0	0	0	122806	148884	0	0	0	0	0	0	0	0	0	0	0	0	0	0	0	0	0	0	0	0	0
P	2796	138.052	8.92065	C3H3N7	137.045					0	0	0	0	0	0	0	0	0	0	0	0	0	0	124934	0	0	0	0	0	0	120825	130935	0	160435	0	0	0	0	0	0	0	0	0	0	0	0	0	0	0
P	2958	138.054	8.92442	CH8N5OP	137.046					0	0	0	0	0	0	0	0	0	0	0	0	0	0	0	121736	0	0	0	0	0	0	0	116177	0	0	0	0	0	0	0	0	0	0	0	0	0	0	0	0
P	3004	138.054	7.92028	CH8N5OP	137.047					0	0	0	0	0	0	0	0	0	0	0	0	0	0	0	89098.4	0	0	0	0	0	0	0	94293.6	0	0	74301.6	0	78274.8	0	0	0	0	0	0	0	0	0	0	0
P	3078	138.055	8.9249	C7H7NO2	137.048	2.05196	3-(1H-Pyrrol-3-yl)-2-propenoic acid; (E)-form	C7H7NO2	Isol. from Streptomyces parvulus	0	0	0	0	0	0	0	0	0	0	0	0	0	0	0	0	114431	0	0	0	0	0	0	0	0	0	0	0	0	0	0	0	0	0	0	0	0	0	0	0
P	520	138.056	7.92243	H7N7S	137.049	-1.84318	2-Amino-4-fluoro-3-hydroxybutanoic acid; (2ξ,3ξ)-form	C4H8FNO3	Prod. by Streptomyces cattleya growing in fluoride-enriched medium	0	104516	235206	117812	114190	0	0	0	0	0	0	0	0	0	0	0	91978.8	114062	0	0	0	0	0	0	0	0	0	0	0	0	140352	191694	119629	0	112004	0	0	0	0	0
P	2682	138.057	8.92484		137.05					0	0	0	0	0	0	0	0	0	0	0	0	0	156821	0	0	0	117721	124027	0	0	0	0	0	0	0	0	0	0	0	0	0	0	0	0	0	0	0	0	0
P	1238	138.057	7.92244	C4H11NO2S	137.05					0	0	0	0	0	128470	123076	0	0	0	0	152566	107263	146814	0	0	0	0	126012	110205	0	0	0	0	0	91732	0	91468	0	113096	0	0	0	0	0	0	0	0	0	0
P	2098	138.059	7.91755	C4H11NO2S	137.051	2.65092	3-(Methylthio)propylamine; S,S-Dioxide	C4H11NO2S		0	0	0	0	0	0	88796.6	167737	0	164475	157190	89340.2	0	0	157179	0	0	0	0	0	100216	100175	99990.7	0	0	99509.9	0	0	0	102029	0	0	0	125041	0	0	101350	0	0	0
P	2836	138.06	8.92065	C4H13NP2	137.052					0	0	0	0	0	0	0	0	0	0	0	0	0	0	103495	0	0	0	0	0	0	85671.9	104617	0	129699	0	0	0	0	0	0	0	0	0	0	0	0	0	0	0
P	2452	138.061	7.9283		137.054					0	0	0	0	0	0	0	0	111490	0	0	0	0	0	0	110230	0	0	0	0	0	0	0	104901	101004	0	103930	0	129632	0	0	0	0	0	0	102093	0	0	0	91924.9
P	2999	138.061	8.9245	CH7N5O3	137.054					0	0	0	0	0	0	0	0	0	0	0	0	0	0	0	92351.4	0	0	0	0	0	0	0	0	0	0	0	0	0	0	0	0	0	0	0	0	0	0	0	0
P	490	138.063	7.92503		137.056					0	88843.3	157020	99874.9	102808	0	0	0	0	0	0	0	0	0	0	0	118044	114378	0	0	0	0	0	0	0	0	0	0	0	0	127162	125988	0	0	113994	0	0	94185.5	97882	0
P	1227	138.065	7.92151	H8N7P	137.058					0	0	0	0	0	108028	97348.1	0	0	0	0	94834.6	98249.2	99116.2	0	0	0	0	110511	107496	0	0	0	0	0	91010.9	0	104214	0	110446	0	0	119841	0	0	0	0	0	0	0
P	2121	138.066	7.91755	C6H7N3O	137.059	-0.152162	7,8-Dihydroimidazo[1,5-c]pyrimidin-5(6H)-one	C6H7N3O	Alkaloid from Aplysina fistularis f. fulva	0	0	0	0	0	0	97636.5	93658.3	0	101082	82248	87705.3	0	0	91787.8	0	0	0	0	0	96526	85767.5	86354.6	0	0	97250.7	0	0	0	102270	0	0	0	87192.3	0	0	88537.2	0	0	0
P	2475	138.068	7.9283	C4H12NO2P	137.061					0	0	0	0	0	0	0	0	83317.2	0	0	0	0	0	0	74636.6	0	0	0	0	0	0	0	75027.8	81794.1	0	88602.7	0	108949	0	0	0	0	0	0	89606.9	0	0	0	75193.4
P	649	138.071	7.91755	C3H11N3OS	137.063					0	0	78610.1	69346.2	69315	0	0	0	0	0	0	0	0	0	0	0	73583.9	70382.4	0	0	0	0	0	0	0	0	0	0	0	0	95403.3	82842.1	0	0	77049.9	0	0	0	74378.6	0
P	4720	138.072	7.90857		137.064					0	0	0	0	0	0	0	0	0	0	0	0	0	0	0	0	0	0	0	0	0	0	0	0	0	0	0	0	0	0	0	0	71045	0	0	0	0	0	0	0
P	6302	144.031	2.95466	C6HN5	143.023					1965.46	0	0	0	0	0	2588.59	0	0	0	3307.11	3167.95	0	3920.58	5721.3	0	0	0	4744.09	34982.4	61844.4	0	0	0	0	0	0	5939.18	0	5391.95	0	2686.4	4991.99	0	0	0	3770.61	0	0	0
P	620	144.035	2.4374	CH10N3OPS	143.028					0	0	248311	0	0	0	0	0	0	0	0	0	0	0	0	0	0	0	0	0	0	0	0	0	0	0	0	0	0	0	0	0	0	0	0	0	0	0	0	0
P	5358	144.036	3.1176	CH10N3OPS	143.029					0	0	0	0	0	0	0	0	0	0	0	0	0	0	0	0	0	0	0	0	0	0	0	0	0	0	0	0	0	0	0	0	0	0	0	0	0	287842	0	0
P	6522	144.037	3.12688	H9N5S2	143.03					0	0	0	0	0	0	0	0	0	0	0	0	0	0	0	0	0	0	0	0	0	0	0	0	0	0	0	0	0	0	0	0	0	0	0	0	0	0	0	0
P	6183	144.038	2.5671	HN9O	143.031					5405.99	0	0	0	0	0	4464.12	0	0	0	1915.96	3638.78	3615.17	5610.86	6482.78	0	0	0	4340.82	103583	7447.44	0	0	0	0	0	0	2666.82	0	3560.2	0	4973.49	2734.73	0	0	0	4587.13	0	0	0
P	2204	144.039	3.5128		143.032					12040.8	0	0	0	0	0	0	247783	0	112589	107067	0	0	0	112299	0	0	0	0	0	118700	107471	126352	0	116004	76331	0	112691	0	91718.7	0	0	0	116775	0	0	105561	0	0	0
P	5914	144.04	3.12065	C4H5N3O3	143.033	0.789799	4-Amino-2,5,6-trihydroxypyrimidine	C4H5N3O3		0	0	0	0	0	0	0	0	0	0	0	0	0	0	0	0	0	0	0	0	0	0	0	0	0	0	0	0	0	0	0	0	0	0	0	0	0	0	0	328272
P	780	144.043	3.10492	C3H6N5P	143.035					0	0	0	273224	0	0	0	0	0	0	0	0	0	0	0	0	0	0	0	0	0	0	0	0	0	0	205598	0	0	0	0	0	0	0	0	0	0	303411	331408	0
P	604	144.043	2.4374	C3H6N5P	143.036					0	0	311554	0	0	0	0	0	0	0	0	0	0	0	0	0	0	0	0	0	0	0	0	0	0	0	0	0	0	0	0	0	0	0	0	0	0	0	0	0
P	526	144.044	3.11944	C9H5NO	143.037					0	270566	0	0	249449	252934	0	0	0	0	0	0	237222	0	0	0	0	0	0	0	0	0	0	0	0	0	0	0	0	0	0	0	0	0	0	0	0	0	0	0
P	1769	144.045	3.12154	CH11N3OP2	143.038					0	0	0	0	0	0	234559	0	0	0	0	228093	0	0	0	0	0	0	223006	0	0	0	0	0	0	0	0	0	0	0	0	0	0	0	0	0	0	0	0	0
P	6171	144.046	3.3123	H10N5PS	143.039					10688.9	0	0	0	0	0	117359	0	0	0	109063	135395	7351.09	123158	51155.5	0	0	0	117341	119089	126193	0	0	0	0	39965.1	0	103338	0	98505.6	0	101066	102301	0	0	0	1907.78	0	0	0
P	5927	144.048	3.12065	C6H9NOS	143.041	2.44939	5-(2-Hydroxyethyl)-4-methylthiazole	C6H9NOS	Present in porcini (Boletus edulis)	0	0	0	0	0	0	0	0	0	0	0	0	0	0	0	0	0	0	0	0	0	0	0	0	0	0	0	0	0	0	0	0	0	0	0	0	0	0	0	319273
P	5612	144.05	3.12179	C2H9NO6	143.042					0	0	0	0	0	0	0	0	0	0	0	0	0	0	0	0	0	0	0	0	0	0	0	0	0	0	0	0	0	0	0	0	0	0	0	0	0	0	278260	0
P	616	144.051	2.4374	C2H9NO6	143.043					0	0	239351	0	0	0	0	0	0	0	0	0	0	0	0	0	0	0	0	0	0	0	0	0	0	0	0	0	0	0	0	0	0	0	0	0	0	0	0	0
P	5346	144.051	3.13012	C3H5N5O2	143.044					0	0	0	0	0	0	0	0	0	0	0	0	0	0	0	0	0	0	0	0	0	0	0	0	0	0	0	0	0	0	0	0	0	0	0	0	0	249858	0	0
P	6530	144.052	3.12688	C3H5N5O2	143.045					0	0	0	0	0	0	0	0	0	0	0	0	0	0	0	0	0	0	0	0	0	0	0	0	0	0	0	0	0	0	0	0	0	0	0	0	0	0	0	0
P	6212	144.054	2.55925	CH10N3O3P	143.046					5853.66	0	0	0	0	0	4335.62	0	0	0	2397.94	3766.42	4792.55	4625.54	3025.49	0	0	0	4707.82	72194.6	3274.21	0	0	0	0	0	0	6114.64	0	10580.1	0	4086.37	5255.75	0	0	0	2036.18	0	0	0
P	644	144.058	2.4374	C5H9N3S	143.051					0	0	131941	0	0	0	0	0	0	0	0	0	0	0	0	0	0	0	0	0	0	0	0	0	0	0	0	0	0	0	0	0	0	0	0	0	0	0	0	0
P	6306	144.061	2.86632	CH9N3O5	143.054					2096.1	0	0	0	0	0	4665.07	0	0	0	3484.02	2364.82	1143.13	1924.97	2467.11	0	0	0	7533.48	23408.5	3933.6	0	0	0	0	0	0	6334.75	0	9527.93	0	10549.4	7241.19	0	0	0	3492.95	0	0	0
P	6080	145.066	9.12569	C10H8O	144.058					0	0	0	0	0	0	0	0	0	0	0	0	0	0	0	0	0	0	0	0	0	0	0	0	0	0	0	0	0	0	0	0	0	0	0	0	0	0	0	154221
P	5685	145.068	9.1263	C7H12OS	144.061	-1.91063	3-Methyl-2-butene-1-thiol; S-Ac	C7H12OS	Constit. of the essential oil of Phyllosma capensis	0	0	0	0	0	0	0	0	0	0	0	0	0	0	0	0	0	0	0	0	0	0	0	0	0	0	0	0	0	0	0	0	0	0	0	0	0	0	156687	0
P	5314	145.069	9.13281	H4N10	144.062					0	0	0	0	0	0	0	0	0	0	0	0	0	0	0	0	0	0	0	0	0	0	0	0	0	0	0	0	0	0	0	0	0	0	0	0	0	149474	0	0
P	6379	145.071	9.41553	C4H8N4O2	144.064					2420.28	0	0	0	0	3987.98	3767.76	0	0	0	0	4451.29	4093.08	3685.89	0	0	0	0	10911.4	15423.2	0	0	0	0	0	0	0	74637.2	0	7437.41	0	0	4476.8	7068.81	0	0	85967.4	0	0	0
P	5964	145.073	9.12569		144.066					0	0	0	0	0	0	0	0	0	0	0	0	0	0	0	0	0	0	0	0	0	0	0	0	0	0	0	0	0	0	0	0	0	0	0	0	0	0	0	153782
P	5650	145.076	9.1263	C9H8N2	144.068					0	0	0	0	0	0	0	0	0	0	0	0	0	0	0	0	0	0	0	0	0	0	0	0	0	0	0	0	0	0	0	0	0	0	0	0	0	0	154055	0
P	5326	145.077	9.13188	C9H8N2	144.07					0	0	0	0	0	0	0	0	0	0	0	0	0	0	0	0	0	0	0	0	0	0	0	0	0	0	0	0	0	0	0	0	0	0	0	0	0	126835	0	0
P	6556	145.078	9.1315	C7H13OP	144.07					0	0	0	0	0	0	0	0	0	0	0	0	0	0	0	0	0	0	0	0	0	0	0	0	0	0	0	0	0	0	0	0	0	0	0	0	0	0	0	0
P	6603	146.053	8.0248	H3N9O	145.046					0	0	0	0	0	0	0	0	0	0	0	0	0	0	0	0	0	0	0	0	0	0	0	0	0	0	0	0	0	0	0	0	0	0	0	0	0	0	0	0
P	6428	146.054	8.37406	H3N9O	145.047					2574.84	0	0	0	0	24469.5	29630.7	0	0	0	0	31504.3	22364.7	13650.5	0	0	0	7815.4	13804.1	11737	0	0	0	0	0	0	0	48074.6	0	0	0	0	52066.9	0	0	0	52922.8	0	0	0
P	6722	146.056	8.02547	C4H7N3O3	145.049	2.07924	Pyruvic acid; Semicarbazone	C4H7N3O3		0	0	0	0	0	0	0	0	0	0	0	0	0	0	0	0	0	0	0	0	0	0	0	0	0	0	0	0	0	0	0	0	0	0	0	0	0	0	0	0
P	5686	146.058	8.009	C3H8N5P	145.051					0	0	0	0	0	0	0	0	0	0	0	0	0	0	0	0	0	0	0	0	0	0	0	0	0	0	0	0	0	0	0	0	0	0	0	0	0	0	69930.5	0
P	5365	146.06	8.00848	C9H7NO	145.052					0	0	0	0	0	0	0	0	0	0	0	0	0	0	0	0	0	0	0	0	0	0	0	0	0	0	0	0	0	0	0	0	0	0	0	0	0	68836.9	0	0
P	5987	148.064	8.84214	C4H10N3OP	147.056					0	0	0	0	0	0	0	0	0	0	0	0	0	0	0	0	0	0	0	0	0	0	0	0	0	0	0	0	0	0	0	0	0	0	0	0	0	0	0	86380.1
P	5923	148.064	9.55934	C4H10N3OP	147.056					0	0	0	0	0	0	0	0	0	0	0	0	0	0	0	0	0	0	0	0	0	0	0	0	0	0	0	0	0	0	0	0	0	0	0	0	0	0	0	82972.3
P	5601	148.066	8.84275	C3H9N5S	147.058					0	0	0	0	0	0	0	0	0	0	0	0	0	0	0	0	0	0	0	0	0	0	0	0	0	0	0	0	0	0	0	0	0	0	0	0	0	0	90565.3	0
P	5582	148.066	9.55996	C3H9N5S	147.058					0	0	0	0	0	0	0	0	0	0	0	0	0	0	0	0	0	0	0	0	0	0	0	0	0	0	0	0	0	0	0	0	0	0	0	0	0	0	88158.7	0
P	5188	148.067	9.55646		147.06					0	0	0	0	0	0	0	0	0	0	0	0	0	0	0	0	0	0	0	0	0	0	0	0	0	0	0	0	0	0	0	0	0	0	0	0	0	100192	0	0
P	5200	148.067	8.83925		147.06					0	0	0	0	0	0	0	0	0	0	0	0	0	0	0	0	0	0	0	0	0	0	0	0	0	0	0	0	0	0	0	0	0	0	0	0	0	106805	0	0
P	6248	148.069	10.0275	H5N9O	147.062					3042.68	0	0	0	0	20103.9	20507.9	0	0	0	0	16097.5	16734.6	11294.6	0	0	0	12997.8	14680.3	0	0	0	0	0	0	0	0	30246.7	0	0	0	0	31604.6	0	0	0	25997.8	0	0	0
P	6293	148.069	9.27915	H5N9O	147.062					3042.68	0	0	0	0	7126.69	3929.05	0	0	0	0	6663.07	2886.47	16081.6	0	0	0	15991.5	18178.4	13550.8	0	0	0	0	0	0	0	40359.3	0	0	0	0	33232.9	0	0	0	29796.7	0	0	0
P	5863	148.071	8.84214	C4H9N3O3	147.064	-2.477	Albizziine	C4H9N3O3		0	0	0	0	0	0	0	0	0	0	0	0	0	0	0	0	0	0	0	0	0	0	0	0	0	0	0	0	0	0	0	0	0	0	0	0	0	0	0	120777
P	5840	148.071	9.55934	C4H9N3O3	147.064	-2.42512	Albizziine	C4H9N3O3		0	0	0	0	0	0	0	0	0	0	0	0	0	0	0	0	0	0	0	0	0	0	0	0	0	0	0	0	0	0	0	0	0	0	0	0	0	0	0	119322
P	5529	148.073	8.84275		147.066					0	0	0	0	0	0	0	0	0	0	0	0	0	0	0	0	0	0	0	0	0	0	0	0	0	0	0	0	0	0	0	0	0	0	0	0	0	0	114892	0
P	5509	148.073	9.55996		147.066					0	0	0	0	0	0	0	0	0	0	0	0	0	0	0	0	0	0	0	0	0	0	0	0	0	0	0	0	0	0	0	0	0	0	0	0	0	0	112188	0
P	5163	148.075	9.55646	C3H10N5P	147.068					0	0	0	0	0	0	0	0	0	0	0	0	0	0	0	0	0	0	0	0	0	0	0	0	0	0	0	0	0	0	0	0	0	0	0	0	0	113180	0	0
P	5169	148.075	8.83925	C3H10N5P	147.068					0	0	0	0	0	0	0	0	0	0	0	0	0	0	0	0	0	0	0	0	0	0	0	0	0	0	0	0	0	0	0	0	0	0	0	0	0	118166	0	0
P	6261	148.077	9.98108	C9H9NO	147.069					1695.21	0	0	0	0	13282.3	16970.5	0	0	0	0	13486	14879.3	11161.7	0	0	0	11283.5	11699.7	0	0	0	0	0	0	0	0	24645.9	0	0	0	0	31175.2	0	0	0	22378.2	0	0	0
P	6304	148.077	9.18686	C9H9NO	147.069					1695.21	0	0	0	0	2089.09	4565.3	0	0	0	0	6098.2	2871.46	13846.4	0	0	0	16135.2	14206.7	4222.91	0	0	0	0	0	0	0	37414.3	0	0	0	0	35134.2	0	0	0	26969.1	0	0	0
P	5913	148.079	8.84214	C6H13NOS	147.072					0	0	0	0	0	0	0	0	0	0	0	0	0	0	0	0	0	0	0	0	0	0	0	0	0	0	0	0	0	0	0	0	0	0	0	0	0	0	0	102428
P	5874	148.079	9.55934	C6H13NOS	147.072					0	0	0	0	0	0	0	0	0	0	0	0	0	0	0	0	0	0	0	0	0	0	0	0	0	0	0	0	0	0	0	0	0	0	0	0	0	0	0	103525
P	5605	148.081	8.84275		147.074					0	0	0	0	0	0	0	0	0	0	0	0	0	0	0	0	0	0	0	0	0	0	0	0	0	0	0	0	0	0	0	0	0	0	0	0	0	0	91856.2	0
P	5577	148.081	9.55996		147.074					0	0	0	0	0	0	0	0	0	0	0	0	0	0	0	0	0	0	0	0	0	0	0	0	0	0	0	0	0	0	0	0	0	0	0	0	0	0	90051.2	0
P	5287	148.082	8.83721	C3H9N5O2	147.075					0	0	0	0	0	0	0	0	0	0	0	0	0	0	0	0	0	0	0	0	0	0	0	0	0	0	0	0	0	0	0	0	0	0	0	0	0	86522.2	0	0
P	5263	148.083	9.55646	C3H9N5O2	147.075					0	0	0	0	0	0	0	0	0	0	0	0	0	0	0	0	0	0	0	0	0	0	0	0	0	0	0	0	0	0	0	0	0	0	0	0	0	83412.1	0	0
P	6562	148.083	8.84239	C3H9N5O2	147.076					0	0	0	0	0	0	0	0	0	0	0	0	0	0	0	0	0	0	0	0	0	0	0	0	0	0	0	0	0	0	0	0	0	0	0	0	0	0	0	0
P	6437	148.084	9.98108		147.077					1688.21	0	0	0	0	8624.71	9373.02	0	0	0	0	4715.97	9837.55	5796.08	0	0	0	6052.69	8160.65	0	0	0	0	0	0	0	0	17616.8	0	0	0	0	20517.7	0	0	0	20284.2	0	0	0
P	3422	149.005	13.4563	N6O4	147.998					0	0	0	0	0	0	0	0	0	0	0	0	0	0	0	0	0	0	0	0	0	0	0	98881.3	0	0	0	0	0	0	0	0	0	0	0	0	0	112187	0	0
P	533	149.006	13.4604	C8H4OS	147.999					0	101371	91686.4	0	106290	0	0	0	0	0	0	0	105987	0	0	0	0	86616.7	0	0	0	0	0	0	0	0	0	0	0	0	0	0	0	0	0	0	0	0	0	0
P	2071	149.01	13.4568	C5N4O2	148.003					0	0	0	0	0	0	0	158046	150397	140644	0	0	0	0	140178	0	0	0	0	0	112612	131769	127641	0	133450	0	0	0	0	0	0	0	0	0	0	172527	0	0	0	248019
P	2931	149.013	13.4305	C2H4N4O2S	148.005					0	0	0	0	0	0	0	0	0	0	0	0	0	0	0	156029	0	0	0	0	0	0	0	174052	0	0	177873	0	150516	0	0	162679	177526	0	211594	0	0	311693	259163	0
P	328	149.014	13.4544	C2H6N4P2	148.007					0	202005	205544	204225	214707	0	0	0	0	0	0	0	201839	0	0	0	172884	181880	0	0	0	0	0	0	0	0	0	0	0	0	168495	0	0	0	0	0	0	0	0	0
P	1982	149.018	13.4568	C5H9OPS	148.011					0	0	0	0	0	0	0	233527	226544	224231	0	0	0	0	195794	0	0	0	0	0	193112	179967	188720	0	178665	0	0	0	0	0	0	0	0	0	0	246192	0	0	0	317510
P	2917	149.02	13.4305	C4H8N2S2	148.013					0	0	0	0	0	0	0	0	0	0	0	0	0	0	0	189291	0	0	0	0	0	0	0	158904	0	0	208936	0	199406	0	0	200483	218064	0	260385	0	0	336033	305203	0
P	317	149.022	13.4544	C2H5N4O2P	148.014					0	218579	249332	250686	239956	0	0	0	0	0	0	0	223744	0	0	0	196838	185245	0	0	0	0	0	0	0	0	0	0	0	0	189926	0	0	0	0	0	0	0	0	0
P	2013	149.026	13.4568	C7H5N2P	148.018					0	0	0	0	0	0	0	206898	207029	210267	0	0	0	0	165745	0	0	0	0	0	166096	143528	155276	0	137814	0	0	0	0	0	0	0	0	0	0	207933	0	0	0	255234
P	2946	149.028	13.4272	C5H10OP2	148.021					0	0	0	0	0	0	0	0	0	0	0	0	0	0	0	143758	0	0	0	0	0	0	0	92926.7	0	0	151323	0	151960	0	0	156916	158551	0	176674	0	0	223092	237646	0
P	413	149.03	13.4544	C4H9N2PS	148.022					0	153628	185178	179737	165027	0	0	0	0	0	0	0	154448	0	0	0	145306	131829	0	0	0	0	0	0	0	0	0	0	0	0	128529	0	0	0	0	0	0	0	0	0
P	2127	149.033	13.4568	CH5N6OP	148.026					0	0	0	0	0	0	0	128783	125563	135184	0	0	0	0	92470.7	0	0	0	0	0	111242	90742.6	94803.2	0	81712.5	0	0	0	0	0	0	0	0	0	0	126410	0	0	0	149771
P	4065	149.035	13.4126	H4N8S	148.028					0	0	0	0	0	0	0	0	0	0	0	0	0	0	0	0	0	0	0	0	0	0	0	0	0	0	89776.5	0	89123.6	0	0	90997.1	0	0	0	0	0	0	129901	0
P	654	149.037	13.4475	C5H9O3P	148.03	2.8507	2-Methyl-2-propenoic acid; 1-Chloroethyl ester	C6H9ClO2		0	0	109588	103181	96541.1	0	0	0	0	0	0	0	0	0	0	0	0	0	0	0	0	0	0	0	0	0	0	0	0	0	0	0	89986.5	0	103833	0	0	117160	0	0
P	3439	150.071	10.5253		149.064					0	0	0	0	0	0	0	0	0	0	0	0	0	0	0	0	0	0	0	0	0	0	0	108186	0	0	0	0	0	0	0	0	0	0	0	0	0	0	0	0
P	6597	150.072	9.0261	CH7N7O2	149.065					0	0	0	0	0	0	0	0	0	0	0	0	0	0	0	0	0	0	0	0	0	0	0	0	0	0	0	0	0	0	0	0	0	0	0	0	0	0	0	0
P	6310	150.074	9.26272	CH7N7O2	149.067					3171.61	0	0	0	2485.46	50857.4	0	0	0	0	0	0	41783.4	25752.4	0	0	0	27380.6	28561.2	0	0	0	0	0	0	0	0	1468.44	0	0	39856.1	0	38255.7	0	0	0	50529.3	0	0	0
P	2730	150.075	10.6102		149.067					3171.61	0	0	0	0	3069.51	1651.65	0	0	0	0	2433.59	0	105441	0	0	0	0	113450	120612	0	0	0	0	0	0	0	4682.34	0	3770.42	0	0	0	7073.71	0	0	3037.02	0	0	0
P	2792	150.076	10.5256	C5H11NO4	149.069	-0.649569	2-Amino-2-deoxylyxose; D-form	C5H11NO4	Prod. by cultures of Streptomyces alboniger	0	0	0	0	0	0	0	0	0	0	0	0	0	0	163057	0	0	0	0	0	138160	0	0	0	0	0	0	0	0	0	0	0	0	0	0	0	0	0	0	0
P	2201	150.076	9.02027	C5H11NO4	149.069	2.69421	2-Amino-2-deoxylyxose; D-form	C5H11NO4	Prod. by cultures of Streptomyces alboniger	0	0	0	0	0	0	0	86355.8	0	0	0	0	0	0	0	0	0	0	0	0	0	0	0	0	0	0	0	0	0	0	0	0	0	0	0	0	0	0	0	209888
P	3356	150.077	10.5036	C6H7N5	149.07	-2.65132	Adenine; 6-N-Me	C6H7N5	Minor constit. of bacterial and viral DNA	0	0	0	0	0	0	0	0	0	0	0	0	0	0	0	0	0	0	0	0	0	171948	157057	0	170429	0	0	0	0	0	0	0	0	0	0	0	0	0	0	0
P	2497	150.078	9.02594	C6H7N5	149.071					0	0	0	0	0	0	0	0	86055.9	0	0	0	0	0	0	0	0	0	0	0	0	0	0	0	0	0	0	0	0	0	0	0	0	0	0	0	0	0	250502	0
P	2936	150.079	10.5254	C4H12N3OP	149.071					0	0	0	0	0	0	0	0	0	0	0	0	0	0	0	185047	0	0	0	0	0	0	0	224650	0	0	0	0	0	0	0	0	0	0	0	0	0	0	0	0
P	6735	150.079	9.026	C4H12N3OP	149.072					0	0	0	0	0	0	0	0	0	0	0	0	0	0	0	0	0	0	0	0	0	0	0	0	0	0	0	0	0	0	0	0	0	0	0	0	0	0	0	0
P	3051	150.08	10.5259	C3H11N5S	149.073					0	0	0	0	0	0	0	0	0	0	0	0	0	0	0	0	195475	0	0	0	0	0	0	0	0	0	0	0	0	0	0	0	0	0	0	0	0	0	0	0
P	424	150.08	9.00562	C3H11N5S	149.073					0	132232	121025	135388	136624	0	0	0	0	0	0	0	0	0	0	0	0	0	0	0	0	0	0	0	0	0	97062.6	0	86141.2	0	91931.7	86055.1	0	0	106499	0	0	270713	0	0
P	1210	150.081	9.009	C3H11N5S	149.074					0	0	0	0	0	135921	0	0	0	0	0	0	116033	0	0	0	0	0	0	0	0	0	0	0	0	0	0	0	0	0	0	0	87989.2	0	0	0	0	0	0	0
P	2635	150.082	10.8499		149.075					2274.97	0	0	0	0	3125.62	0	0	0	0	0	2794.2	3973.82	222824	0	0	0	220131	230070	0	0	0	0	0	0	0	0	3501.75	0	0	0	0	0	6598.76	0	0	7210.84	0	0	0
P	1652	150.083	9.31028		149.075					1820.02	0	0	0	0	103048	140965	0	0	0	107247	128655	0	49275.5	0	0	0	0	53741.9	54140.3	50355.3	0	0	0	0	0	0	106875	0	100423	0	0	0	104729	0	0	91656.4	0	0	0
P	3225	150.083	10.7768		149.076					2274.97	0	0	0	0	3125.62	5014.32	0	0	2995.51	4147.83	2794.2	0	138328	0	0	0	0	143765	227845	164699	0	0	0	0	7281.45	0	3501.75	0	4002.53	0	0	0	6323.76	0	0	7210.84	0	0	0
P	2761	150.084	10.5256	H7N9O	149.077					0	0	0	0	0	0	0	0	0	0	0	0	0	0	257068	0	0	0	0	0	249699	0	0	0	0	0	0	0	0	0	0	0	0	0	0	0	0	0	0	0
P	2055	150.084	9.00907	H7N9O	149.077					0	0	0	0	0	0	0	163255	0	141562	148286	0	0	0	0	0	0	0	0	0	0	0	0	0	0	113521	0	0	0	104726	0	0	0	0	0	0	0	0	0	0
P	2417	150.085	9.01994	H7N9O	149.078					0	0	0	0	0	0	0	0	143726	0	0	0	0	0	0	0	0	0	0	0	0	0	0	0	0	0	0	0	0	0	0	0	0	0	0	106254	0	0	0	352020
P	3344	150.085	10.5036	H7N9O	149.078					0	0	0	0	0	0	0	0	0	0	0	0	0	0	0	0	0	0	0	0	0	252649	253872	0	246496	0	0	0	0	0	0	0	0	0	0	0	0	0	0	0
P	5439	150.087	9.02622	C4H11N3O3	149.079					0	0	0	0	0	0	0	0	0	0	0	0	0	0	0	0	0	0	0	0	0	0	0	0	0	0	0	0	0	0	0	0	0	0	0	0	0	0	336847	0
P	2915	150.087	10.5254	C4H11N3O3	149.079					0	0	0	0	0	0	0	0	0	0	0	0	0	0	0	259575	0	0	0	0	0	0	0	242302	0	0	0	0	0	0	0	0	0	0	0	0	0	0	0	0
P	3044	150.088	10.5259	C4H11N3O3	149.081					0	0	0	0	0	0	0	0	0	0	0	0	0	0	0	0	251590	0	0	0	0	0	0	0	0	0	0	0	0	0	0	0	0	0	0	0	0	0	0	0
P	383	150.088	9.00663	C4H11N3O3	149.081					0	162729	183329	175276	169292	0	0	0	0	0	0	0	0	0	0	0	0	0	0	0	0	0	0	0	0	0	117704	0	122838	0	0	106939	0	0	111560	0	0	332708	0	0
P	2589	150.089	9.00559		149.082					0	0	0	0	0	0	0	0	0	0	0	0	149620	0	0	0	0	0	0	0	0	0	0	0	0	0	0	0	0	0	102841	0	104884	0	0	0	0	0	0	0
P	2629	150.09	10.7011	C3H12N5P	149.083					1272.81	0	0	0	0	3290.29	0	0	0	0	0	5659.6	2527.16	248648	0	0	0	253982	251039	0	0	0	0	0	0	0	0	5683.41	0	0	0	0	0	5017.21	0	0	2006.5	0	0	0
P	1180	150.09	9.33134	C3H12N5P	149.083					1272.81	0	0	0	0	166148	163349	0	0	0	108656	151706	0	52501.4	0	0	0	0	58456.2	56404.2	51634.4	0	0	0	0	0	0	104384	0	96713.5	0	0	0	98822.9	0	0	103520	0	0	0
P	3224	150.091	10.7101	C3H12N5P	149.083					1272.81	0	0	0	0	4732.15	3628.12	0	0	7348.85	4972.29	5659.6	0	157461	0	0	0	0	156124	233848	160780	0	0	0	0	4694.95	0	5683.41	0	3330.06	0	0	0	5017.21	0	0	2006.5	0	0	0
P	2764	150.092	10.5256	C9H11NO	149.084	1.67879	2'-Aminoacetophenone; N-Me	C9H11NO		0	0	0	0	0	0	0	0	0	0	0	0	0	0	230093	0	0	0	0	0	245505	0	0	0	0	0	0	0	0	0	0	0	0	0	0	0	0	0	0	0
P	2067	150.092	9.00629	C9H11NO	149.084	2.17349	2'-Aminoacetophenone; N-Me	C9H11NO		0	0	0	0	0	0	0	155242	0	149187	155314	0	0	0	0	0	0	0	0	0	0	0	0	0	0	103824	0	0	0	96250	0	0	0	0	0	0	0	0	0	0
P	2431	150.093	9.01994		149.085					0	0	0	0	0	0	0	0	135951	0	0	0	0	0	0	0	0	0	0	0	0	0	0	0	0	0	0	0	0	0	0	0	0	0	0	105170	0	0	0	278675
P	3346	150.093	10.5036		149.085					0	0	0	0	0	0	0	0	0	0	0	0	0	0	0	0	0	0	0	0	0	218616	232865	0	206426	0	0	0	0	0	0	0	0	0	0	0	0	0	0	0
P	2926	150.094	10.5254	C6H15NOS	149.087					0	0	0	0	0	0	0	0	0	0	0	0	0	0	0	207157	0	0	0	0	0	0	0	168063	0	0	0	0	0	0	0	0	0	0	0	0	0	0	0	0
P	5452	150.094	9.02622	C6H15NOS	149.087					0	0	0	0	0	0	0	0	0	0	0	0	0	0	0	0	0	0	0	0	0	0	0	0	0	0	0	0	0	0	0	0	0	0	0	0	0	0	262394	0
P	3056	150.096	10.5259	C6H15NOS	149.088					0	0	0	0	0	0	0	0	0	0	0	0	0	0	0	0	194966	0	0	0	0	0	0	0	0	0	0	0	0	0	0	0	0	0	0	0	0	0	0	0
P	486	150.096	9.00562		149.088					0	105634	123590	120728	105966	0	0	0	0	0	0	0	0	0	0	0	0	0	0	0	0	0	0	0	0	0	82740.5	0	84689.6	0	76235.5	82988	0	0	94086.4	0	0	241715	0	0
P	1265	150.097	9.33804		149.09					2527.91	80922.9	0	0	3540.85	100571	0	0	0	0	0	0	98862.1	33080.7	0	0	0	40876.5	40869.1	0	0	0	0	0	0	0	0	4920.96	0	0	72890.1	0	75224.8	0	0	0	2747.25	0	0	0
P	2646	150.098	10.7319	C3H11N5O2	149.09					2527.91	0	0	0	0	2547.81	0	0	0	0	0	2242.68	3155.13	173424	0	0	0	180838	174983	0	0	0	0	0	0	0	0	2684.56	0	0	0	0	0	3826.56	0	0	3503.36	0	0	0
P	1733	150.098	9.34917	C3H11N5O2	149.091					2527.91	0	0	0	0	86800.9	101797	0	0	0	73720.3	90287.9	0	40131.7	0	0	0	0	42024.8	41665.7	38256.5	0	0	0	0	4003.78	0	61738.9	0	65722.2	0	0	0	73197.6	0	0	65640.1	0	0	0
P	3235	150.098	10.6778	C3H11N5O2	149.091					2527.91	0	0	0	0	2547.81	3317.82	0	0	4615.46	3429.74	2242.68	0	112872	0	0	0	0	102602	153965	107389	0	0	0	0	5528.46	0	2684.56	0	3669.47	0	0	0	3087.19	0	0	3503.36	0	0	0
P	2811	150.099	10.5256	C3H11N5O2	149.092					0	0	0	0	0	0	0	0	0	0	0	0	0	0	139385	0	0	0	0	0	161632	0	0	0	0	0	0	0	0	0	0	0	0	0	0	0	0	0	0	0
P	2195	150.1	9.01883		149.092					0	0	0	0	0	0	0	89786.4	0	86581.3	94082.8	0	0	0	0	0	0	0	0	0	0	0	0	0	0	0	0	0	0	0	0	0	0	0	0	0	0	0	0	152186
P	3363	150.1	10.5036		149.093					0	0	0	0	0	0	0	0	0	0	0	0	0	0	0	0	0	0	0	0	0	135193	150005	0	125451	0	0	0	0	0	0	0	0	0	0	0	0	0	0	0
P	2502	150.101	9.02594		149.094					0	0	0	0	0	0	0	0	83805.8	0	0	0	0	0	0	0	0	0	0	0	0	0	0	0	0	0	0	0	0	0	0	0	0	0	0	0	0	0	133873	0
P	2987	150.102	10.5255	C8H11N3	149.095					0	0	0	0	0	0	0	0	0	0	0	0	0	0	0	121729	0	0	0	0	0	0	0	0	0	0	0	0	0	0	0	0	0	0	0	0	0	0	0	0
P	6737	150.102	9.026	C8H11N3	149.095					0	0	0	0	0	0	0	0	0	0	0	0	0	0	0	0	0	0	0	0	0	0	0	0	0	0	0	0	0	0	0	0	0	0	0	0	0	0	0	0
P	3110	150.103	10.5259	C6H16NOP	149.096					0	0	0	0	0	0	0	0	0	0	0	0	0	0	0	0	114866	0	0	0	0	0	0	0	0	0	0	0	0	0	0	0	0	0	0	0	0	0	0	0
P	5180	150.104	9.02273	C6H16NOP	149.096					0	0	0	0	0	0	0	0	0	0	0	0	0	0	0	0	0	0	0	0	0	0	0	0	0	0	0	0	0	0	0	0	0	0	0	0	0	113832	0	0
P	6336	150.105	9.33063	C5H15N3S	149.098					1703.71	0	0	0	4278.94	55862.4	0	0	0	0	0	0	46240.8	26901.4	0	0	0	26852.5	24983	0	0	0	0	0	0	0	0	4316.53	0	0	45899.8	0	41668.8	0	0	0	36955.7	0	0	0
P	2721	150.106	10.8002	C5H15N3S	149.098					1703.71	0	0	0	0	4323.94	6566.34	0	0	0	0	1826.17	2532.8	106545	0	0	0	66928.1	61868.3	62433.6	0	0	0	0	0	0	0	1719.19	0	0	0	0	0	2111.03	0	0	977.476	0	0	0
P	6005	150.108	9.02562		149.1					0	0	0	0	0	0	0	0	0	0	0	0	0	0	0	0	0	0	0	0	0	0	0	0	0	0	0	0	0	0	0	0	0	0	0	0	0	0	0	88384.9
P	5722	150.11	9.02643	C2H11N7O	149.102					0	0	0	0	0	0	0	0	0	0	0	0	0	0	0	0	0	0	0	0	0	0	0	0	0	0	0	0	0	0	0	0	0	0	0	0	0	0	75711.4	0
P	2772	151.06	2.18853	C5H10O5	150.053	-1.00343	threo-2-Pentulose; D-form	C5H10O5	Prod. by microbacteria from xylose. Intermed. in carbohydrate metab. of plants. Component of the lipopolysaccharides of the pseudomonad Pseudomonas vesicularis	2291.32	0	0	0	0	0	2405.38	1439.94	0	2466.48	1480.22	923.423	0	0	123386	0	0	0	0	62275.3	76596.5	0	112516	0	0	0	0	5030.6	0	5495.46	0	1461.96	1202.7	0	0	0	2894.44	0	0	0
P	6712	151.061	8.59255	H7N8P	150.053	-2.18703	Butyl ethyl disulfide	C6H14S2	Constit. of the fruit of Durio zibethinus and oils of Ferula spp. and Nigella sativa	0	0	0	0	0	0	0	0	0	0	0	0	0	0	0	0	0	0	0	0	0	0	0	0	0	0	0	0	0	0	0	0	0	0	0	0	0	0	0	0
P	3345	151.061	1.75348	C6H14S2	150.054	-1.97017	1,7-Dihydro-2-methyl-6H-purin-6-one	C6H6N4O		0	0	0	0	0	0	0	0	0	0	0	0	0	0	0	0	0	0	0	0	0	142118	0	0	0	0	0	0	0	0	0	0	0	0	0	0	0	0	0	0
P	2910	151.062	1.78131	C6H6N4O	150.055					0	0	0	0	0	0	0	0	0	0	0	0	0	0	0	168940	0	0	0	0	0	0	0	191140	160534	0	0	0	0	0	0	0	0	0	0	0	0	0	0	0
P	5545	151.063	8.59257	C4H11N2O2P	150.056					0	0	0	0	0	0	0	0	0	0	0	0	0	0	0	0	0	0	0	0	0	0	0	0	0	0	0	0	0	0	0	0	0	0	0	0	0	0	139791	0
P	3031	151.064	1.77048	C3H10N4OS	150.057					0	0	0	0	0	0	0	0	0	0	0	0	0	0	0	0	245932	0	0	0	0	0	0	0	0	0	0	0	0	0	0	0	0	0	0	0	0	0	0	0
P	5112	151.064	8.5924	C3H10N4OS	150.057					0	0	0	0	0	0	0	0	0	0	0	0	0	0	0	0	0	0	0	0	0	0	0	0	0	0	0	0	0	0	0	0	0	0	0	0	0	198505	0	0
P	2608	151.066	1.78163		150.059					0	0	0	0	0	0	0	0	0	0	0	0	0	368715	0	0	0	330278	388446	0	0	0	0	0	0	0	0	0	0	0	0	0	0	0	0	0	0	0	0	0
P	6145	151.066	8.58674		150.059					0	0	0	0	0	0	0	0	0	0	0	0	0	0	0	0	0	0	0	0	0	0	0	0	0	0	0	0	0	0	0	0	0	0	0	0	0	0	0	0
P	6451	151.066	7.71284	C9H11P	150.059					2229.44	0	0	0	0	1830.88	2486.92	0	0	0	0	3072.36	1567.21	1466.7	0	0	0	0	1536.12	3346.67	0	0	0	0	0	0	0	31623.7	0	0	0	0	23120.9	0	0	0	26633.9	0	0	0
P	2743	151.068	2.16083	C9H11P	150.06					1896.52	0	0	0	0	0	3041.34	4290.33	0	0	3222.13	2954.09	0	0	619816	0	0	0	0	440670	485958	0	604758	0	0	0	0	5617.29	0	0	0	3032.82	3656.22	0	0	0	3300.78	0	0	0
P	5899	151.069	7.5078	H6N8O2	150.061					0	0	0	0	0	0	0	0	0	0	0	0	0	0	0	0	0	0	0	0	0	0	0	0	0	0	0	0	0	0	0	0	0	0	0	0	0	0	0	106450
P	5755	151.069	8.59195	H6N8O2	150.061					0	0	0	0	0	0	0	0	0	0	0	0	0	0	0	0	0	0	0	0	0	0	0	0	0	0	0	0	0	0	0	0	0	0	0	0	0	0	0	554770
P	3329	151.069	1.76216	H6N8O2	150.061					0	0	0	0	0	0	0	0	0	0	0	0	0	0	0	0	0	0	0	0	0	681333	601098	0	0	0	0	0	0	0	0	0	0	0	0	0	0	0	0	0
P	2878	151.07	1.78131	C6H15PS	150.063					0	0	0	0	0	0	0	0	0	0	0	0	0	0	0	725541	0	0	0	0	0	0	0	790731	712259	0	0	0	0	0	0	0	0	0	0	0	0	0	0	0
P	5503	151.071	7.50842	C6H15PS	150.063					0	0	0	0	0	0	0	0	0	0	0	0	0	0	0	0	0	0	0	0	0	0	0	0	0	0	0	0	0	0	0	0	0	0	0	0	0	0	131522	0
P	5395	151.071	8.59257	C6H15PS	150.063					0	0	0	0	0	0	0	0	0	0	0	0	0	0	0	0	0	0	0	0	0	0	0	0	0	0	0	0	0	0	0	0	0	0	0	0	0	0	673985	0
P	3022	151.072	1.77048	C4H10N2O4	150.065					0	0	0	0	0	0	0	0	0	0	0	0	0	0	0	0	883067	0	0	0	0	0	0	0	0	0	0	0	0	0	0	0	0	0	0	0	0	0	0	0
P	5009	151.072	8.5924	C5H6N6	150.065					0	0	0	0	0	0	0	0	0	0	0	0	0	0	0	0	0	0	0	0	0	0	0	0	0	0	0	0	0	0	0	0	0	0	0	0	0	815929	0	0
P	5121	151.072	7.50493	C5H6N6	150.065					0	0	0	0	0	0	0	0	0	0	0	0	0	0	0	0	0	0	0	0	0	0	0	0	0	0	0	0	0	0	0	0	0	0	0	0	0	152452	0	0
P	2603	151.074	1.77607	C3H11N4OP	150.066					0	0	0	0	0	0	0	0	0	0	0	0	0	1.08564e+06	0	0	0	1.03097e+06	1.10299e+06	0	0	0	0	0	0	0	0	0	0	0	0	0	0	0	0	0	0	0	0	0
P	6186	151.074	7.49148	C3H11N4OP	150.066					0	0	0	0	0	0	0	0	0	0	0	0	0	0	0	0	0	0	0	0	0	0	0	0	0	0	0	0	0	0	0	0	0	0	0	0	0	0	0	0
P	6098	151.074	8.58674	C3H11N4OP	150.066					0	0	0	0	0	0	0	0	0	0	0	0	0	0	0	0	0	0	0	0	0	0	0	0	0	0	0	0	0	0	0	0	0	0	0	0	0	0	0	0
P	2740	151.076	2.04363	C9H10O2	150.068	1.8567	Benzoic acid; Et ester	C9H10O2	Found in various fruits, e.g. apple, banana and sweet cherry	1584	0	0	0	0	0	8388.98	1791.29	0	4418.64	6610.96	6716.34	0	0	1.33276e+06	0	0	0	0	1.19033e+06	1.22804e+06	0	1.34535e+06	0	0	0	0	4034.64	0	11226.2	0	9312.73	6706.07	0	0	0	4849.27	0	0	0
P	5739	151.076	8.59195	C2H10N6S	150.069					0	0	0	0	0	0	0	0	0	0	0	0	0	0	0	0	0	0	0	0	0	0	0	0	0	0	0	0	0	0	0	0	0	0	0	0	0	0	0	1.3706e+06
P	5779	151.076	7.5078	C2H10N6S	150.069					0	0	0	0	0	0	0	0	0	0	0	0	0	0	0	0	0	0	0	0	0	0	0	0	0	0	0	0	0	0	0	0	0	0	0	0	0	0	0	258532
P	3325	151.077	1.75348	C2H10N6S	150.07					0	0	0	0	0	0	0	0	0	0	0	0	0	0	0	0	0	0	0	0	0	1.40837e+06	0	0	0	0	0	0	0	0	0	0	0	0	0	0	0	0	0	0
P	2869	151.078	1.78131		150.07					0	0	0	0	0	0	0	0	0	0	0	0	0	0	0	1.38666e+06	0	0	0	0	0	0	0	1.46761e+06	1.39997e+06	0	0	0	0	0	0	0	0	0	0	0	0	0	0	0
P	5432	151.079	7.50842	C6H14O2S	150.071	-1.31432	3-(Methylthio)propanal; Di-Me acetal	C6H14O2S		0	0	0	0	0	0	0	0	0	0	0	0	0	0	0	0	0	0	0	0	0	0	0	0	0	0	0	0	0	0	0	0	0	0	0	0	0	0	267767	0
P	5381	151.079	8.59257	C6H14O2S	150.071	-1.00929	3-(Methylthio)propanal; Di-Me acetal	C6H14O2S		0	0	0	0	0	0	0	0	0	0	0	0	0	0	0	0	0	0	0	0	0	0	0	0	0	0	0	0	0	0	0	0	0	0	0	0	0	0	1.4956e+06	0
P	3020	151.08	1.77048	C6H16P2	150.072					0	0	0	0	0	0	0	0	0	0	0	0	0	0	0	0	1.48207e+06	0	0	0	0	0	0	0	0	0	0	0	0	0	0	0	0	0	0	0	0	0	0	0
P	4996	151.08	8.5924	C6H16P2	150.073					0	0	0	0	0	0	0	0	0	0	0	0	0	0	0	0	0	0	0	0	0	0	0	0	0	0	0	0	0	0	0	0	0	0	0	0	0	1.43152e+06	0	0
P	5055	151.08	7.50493	C6H16P2	150.073					0	0	0	0	0	0	0	0	0	0	0	0	0	0	0	0	0	0	0	0	0	0	0	0	0	0	0	0	0	0	0	0	0	0	0	0	0	271916	0	0
P	4677	151.081	7.48477		150.074					0	0	0	0	0	0	0	0	0	0	0	0	0	0	0	0	0	0	0	0	0	0	0	0	0	0	0	0	0	0	0	74004.5	75172.6	0	0	0	0	0	0	0
P	2601	151.081	1.77607		150.074					0	0	0	0	0	0	0	0	0	0	0	0	0	1.52792e+06	0	0	0	1.54936e+06	1.53171e+06	0	0	0	0	0	0	0	0	0	0	0	0	0	0	0	0	0	0	0	0	0
P	6093	151.082	8.58674		150.074					0	0	0	0	0	0	0	0	0	0	0	0	0	0	0	0	0	0	0	0	0	0	0	0	0	0	0	0	0	0	0	0	0	0	0	0	0	0	0	0
P	2739	151.083	2.11858	C3H10N4O3	150.076					3365.51	0	0	0	0	0	10519.9	2824.82	0	0	7899.89	5528.41	0	0	1.47692e+06	0	0	0	0	1.58432e+06	1.55423e+06	0	1.54804e+06	0	0	0	0	2736.51	0	0	0	9832.22	11129.7	0	0	0	5413.73	0	0	0
P	4782	151.083	7.83314	C3H10N4O3	150.076					5624.49	0	0	0	0	0	1608.11	3706.49	0	1735.08	2502.51	2649.13	0	0	2855.75	0	0	0	0	2158.57	7225.38	0	6758.73	0	0	78793.4	0	79162.5	0	72652.9	0	0	0	73105.4	0	0	73160.9	0	0	0
P	5771	151.084	7.5078		150.077					0	0	0	0	0	0	0	0	0	0	0	0	0	0	0	0	0	0	0	0	0	0	0	0	0	0	0	0	0	0	0	0	0	0	0	0	0	0	0	314392
P	5737	151.084	8.59195		150.077					0	0	0	0	0	0	0	0	0	0	0	0	0	0	0	0	0	0	0	0	0	0	0	0	0	0	0	0	0	0	0	0	0	0	0	0	0	0	0	1.59132e+06
P	3324	151.084	1.76216		150.077					0	0	0	0	0	0	0	0	0	0	0	0	0	0	0	0	0	0	0	0	0	1.51854e+06	1.54469e+06	0	0	0	0	0	0	0	0	0	0	0	0	0	0	0	0	0
P	2868	151.086	1.78131	C2H11N6P	150.078					0	0	0	0	0	0	0	0	0	0	0	0	0	0	0	1.40633e+06	0	0	0	0	0	0	0	1.46131e+06	1.44768e+06	0	0	0	0	0	0	0	0	0	0	0	0	0	0	0
P	5426	151.086	7.50842	C8H10N2O	150.079	-1.54907	Sibyllimycin	C8H10N2O	Metab. of Thermoactinomyces sp.	0	0	0	0	0	0	0	0	0	0	0	0	0	0	0	0	0	0	0	0	0	0	0	0	0	0	0	0	0	0	0	0	0	0	0	0	0	0	293105	0
P	5379	151.086	8.59257	C8H10N2O	150.079	-0.939041	Sibyllimycin	C8H10N2O	Metab. of Thermoactinomyces sp.	0	0	0	0	0	0	0	0	0	0	0	0	0	0	0	0	0	0	0	0	0	0	0	0	0	0	0	0	0	0	0	0	0	0	0	0	0	0	1.47374e+06	0
P	3021	151.088	1.77048	C6H15O2P	150.08					0	0	0	0	0	0	0	0	0	0	0	0	0	0	0	0	1.36681e+06	0	0	0	0	0	0	0	0	0	0	0	0	0	0	0	0	0	0	0	0	0	0	0
P	4997	151.088	8.5924	C6H15O2P	150.081					0	0	0	0	0	0	0	0	0	0	0	0	0	0	0	0	0	0	0	0	0	0	0	0	0	0	0	0	0	0	0	0	0	0	0	0	0	1.43028e+06	0	0
P	5057	151.088	7.50493	C6H15O2P	150.081					0	0	0	0	0	0	0	0	0	0	0	0	0	0	0	0	0	0	0	0	0	0	0	0	0	0	0	0	0	0	0	0	0	0	0	0	0	265932	0	0
P	2602	151.089	1.77607	C5H14N2OS	150.082					0	0	0	0	0	0	0	0	0	0	0	0	0	1.25288e+06	0	0	0	1.32485e+06	1.23889e+06	0	0	0	0	0	0	0	0	0	0	0	0	0	0	0	0	0	0	0	0	0
P	6173	151.089	7.49148	C5H14N2OS	150.082					0	0	0	0	0	0	0	0	0	0	0	0	0	0	0	0	0	0	0	0	0	0	0	0	0	0	0	0	0	0	0	0	0	0	0	0	0	0	0	0
P	6094	151.089	8.58674	C5H14N2OS	150.082					0	0	0	0	0	0	0	0	0	0	0	0	0	0	0	0	0	0	0	0	0	0	0	0	0	0	0	0	0	0	0	0	0	0	0	0	0	0	0	0
P	2741	151.091	2.14749		150.084					6422.16	0	0	0	0	0	11191.6	7882.32	0	0	4609.2	7741.77	0	0	1.03373e+06	0	0	0	0	1.24868e+06	1.19004e+06	0	1.11774e+06	0	0	0	0	898.094	0	0	0	6172.63	9981.55	0	0	0	4534.59	0	0	0
P	5794	151.092	7.5078		150.085					0	0	0	0	0	0	0	0	0	0	0	0	0	0	0	0	0	0	0	0	0	0	0	0	0	0	0	0	0	0	0	0	0	0	0	0	0	0	0	209571
P	5740	151.092	8.59195		150.085					0	0	0	0	0	0	0	0	0	0	0	0	0	0	0	0	0	0	0	0	0	0	0	0	0	0	0	0	0	0	0	0	0	0	0	0	0	0	0	1.15817e+06
P	3327	151.092	1.76216		150.085					0	0	0	0	0	0	0	0	0	0	0	0	0	0	0	0	0	0	0	0	0	1.05343e+06	1.11374e+06	0	0	0	0	0	0	0	0	0	0	0	0	0	0	0	0	0
P	2874	151.093	1.78131	C2H10N6O2	150.086					0	0	0	0	0	0	0	0	0	0	0	0	0	0	0	944546	0	0	0	0	0	0	0	981187	988256	0	0	0	0	0	0	0	0	0	0	0	0	0	0	0
P	5460	151.094	7.50842	C2H10N6O2	150.087					0	0	0	0	0	0	0	0	0	0	0	0	0	0	0	0	0	0	0	0	0	0	0	0	0	0	0	0	0	0	0	0	0	0	0	0	0	0	194477	0
P	5382	151.094	8.59257	C2H10N6O2	150.087					0	0	0	0	0	0	0	0	0	0	0	0	0	0	0	0	0	0	0	0	0	0	0	0	0	0	0	0	0	0	0	0	0	0	0	0	0	0	1.05693e+06	0
P	3023	151.095	1.77048		150.088					0	0	0	0	0	0	0	0	0	0	0	0	0	0	0	0	885019	0	0	0	0	0	0	0	0	0	0	0	0	0	0	0	0	0	0	0	0	0	0	0
P	5003	151.096	8.5924	C6H14O4	150.088					0	0	0	0	0	0	0	0	0	0	0	0	0	0	0	0	0	0	0	0	0	0	0	0	0	0	0	0	0	0	0	0	0	0	0	0	0	917064	0	0
P	5100	151.096	7.50493	C6H14O4	150.088					0	0	0	0	0	0	0	0	0	0	0	0	0	0	0	0	0	0	0	0	0	0	0	0	0	0	0	0	0	0	0	0	0	0	0	0	0	168834	0	0
P	2604	151.097	1.77607	C6H14O4	150.09					0	0	0	0	0	0	0	0	0	0	0	0	0	772336	0	0	0	832512	766904	0	0	0	0	0	0	0	0	0	0	0	0	0	0	0	0	0	0	0	0	0
P	6240	151.097	7.49148	C7H10N4	150.09					0	0	0	0	0	0	0	0	0	0	0	0	0	0	0	0	0	0	0	0	0	0	0	0	0	0	0	0	0	0	0	0	0	0	0	0	0	0	0	0
P	6109	151.097	8.58674	C7H10N4	150.09					0	0	0	0	0	0	0	0	0	0	0	0	0	0	0	0	0	0	0	0	0	0	0	0	0	0	0	0	0	0	0	0	0	0	0	0	0	0	0	0
P	2742	151.099	2.16247	C5H15N2OP	150.092					3492.74	0	0	0	0	0	5256.12	4361.08	0	1617.06	5448.19	7670.86	0	0	628250	0	0	0	0	770651	723772	0	680188	0	0	0	0	3974.68	0	4904.79	0	7459.7	4833.41	0	0	0	4734.16	0	0	0
P	5859	151.1	7.5078	C5H15N2OP	150.093					0	0	0	0	0	0	0	0	0	0	0	0	0	0	0	0	0	0	0	0	0	0	0	0	0	0	0	0	0	0	0	0	0	0	0	0	0	0	0	123263
P	5748	151.1	8.59195	C5H15N2OP	150.093					0	0	0	0	0	0	0	0	0	0	0	0	0	0	0	0	0	0	0	0	0	0	0	0	0	0	0	0	0	0	0	0	0	0	0	0	0	0	0	712930
P	3330	151.1	1.75348	C5H15N2OP	150.093					0	0	0	0	0	0	0	0	0	0	0	0	0	0	0	0	0	0	0	0	0	640049	0	0	0	0	0	0	0	0	0	0	0	0	0	0	0	0	0	0
P	2883	151.101	1.78131	C4H14N4S	150.094					0	0	0	0	0	0	0	0	0	0	0	0	0	0	0	574870	0	0	0	0	0	0	0	596989	605393	0	0	0	0	0	0	0	0	0	0	0	0	0	0	0
P	5541	151.102	7.50842	C4H14N4S	150.095					0	0	0	0	0	0	0	0	0	0	0	0	0	0	0	0	0	0	0	0	0	0	0	0	0	0	0	0	0	0	0	0	0	0	0	0	0	0	114073	0
P	5396	151.102	8.59257	C4H14N4S	150.095					0	0	0	0	0	0	0	0	0	0	0	0	0	0	0	0	0	0	0	0	0	0	0	0	0	0	0	0	0	0	0	0	0	0	0	0	0	0	624959	0
P	3024	151.103	1.77048		150.096					0	0	0	0	0	0	0	0	0	0	0	0	0	0	0	0	540827	0	0	0	0	0	0	0	0	0	0	0	0	0	0	0	0	0	0	0	0	0	0	0
P	5027	151.103	8.5924		150.096					0	0	0	0	0	0	0	0	0	0	0	0	0	0	0	0	0	0	0	0	0	0	0	0	0	0	0	0	0	0	0	0	0	0	0	0	0	538548	0	0
P	5208	151.103	7.50493		150.096					0	0	0	0	0	0	0	0	0	0	0	0	0	0	0	0	0	0	0	0	0	0	0	0	0	0	0	0	0	0	0	0	0	0	0	0	0	101156	0	0
P	2607	151.105	1.77607	CH10N8O	150.098					0	0	0	0	0	0	0	0	0	0	0	0	0	464977	0	0	0	507834	464003	0	0	0	0	0	0	0	0	0	0	0	0	0	0	0	0	0	0	0	0	0
P	6404	151.105	7.49148	CH10N8O	150.098					0	0	0	0	0	0	0	0	0	0	0	0	0	0	0	0	0	0	0	0	0	0	0	0	0	0	0	0	0	0	0	0	0	0	0	0	0	0	0	0
P	6134	151.105	8.58674	CH10N8O	150.098					0	0	0	0	0	0	0	0	0	0	0	0	0	0	0	0	0	0	0	0	0	0	0	0	0	0	0	0	0	0	0	0	0	0	0	0	0	0	0	0
P	2745	151.107	2.14371	C5H14N2O3	150.1					4998.23	0	0	0	0	0	3868.57	2631.13	0	3742.87	5303.84	3792.71	0	0	370767	0	0	0	0	463514	433308	0	399143	0	0	0	0	2161.5	0	2280.46	0	4761.46	1813.16	0	0	0	2601.91	0	0	0
P	5766	151.108	8.59195	C5H14N2O3	150.1					0	0	0	0	0	0	0	0	0	0	0	0	0	0	0	0	0	0	0	0	0	0	0	0	0	0	0	0	0	0	0	0	0	0	0	0	0	0	0	393042
P	3332	151.108	1.75348	C5H14N2O3	150.101					0	0	0	0	0	0	0	0	0	0	0	0	0	0	0	0	0	0	0	0	0	371723	0	0	0	0	0	0	0	0	0	0	0	0	0	0	0	0	0	0
P	2889	151.109	1.78131		150.102					0	0	0	0	0	0	0	0	0	0	0	0	0	0	0	323807	0	0	0	0	0	0	0	339163	349085	0	0	0	0	0	0	0	0	0	0	0	0	0	0	0
P	5427	151.11	8.59257	C4H15N4P	150.103					0	0	0	0	0	0	0	0	0	0	0	0	0	0	0	0	0	0	0	0	0	0	0	0	0	0	0	0	0	0	0	0	0	0	0	0	0	0	339741	0
P	3028	151.111	1.77048	C4H15N4P	150.104					0	0	0	0	0	0	0	0	0	0	0	0	0	0	0	0	293156	0	0	0	0	0	0	0	0	0	0	0	0	0	0	0	0	0	0	0	0	0	0	0
P	5067	151.111	8.58906	C10H14O	150.104	-2.8969	Safranal	C10H14O	Constit. of Crocus sativa. Also found in Aspalathus linearis, Camilla sinensis and other plants	0	0	0	0	0	0	0	0	0	0	0	0	0	0	0	0	0	0	0	0	0	0	0	0	0	0	0	0	0	0	0	0	0	0	0	0	0	291012	0	0
P	2614	151.113	1.77607		150.106					0	0	0	0	0	0	0	0	0	0	0	0	0	230403	0	0	0	264833	231017	0	0	0	0	0	0	0	0	0	0	0	0	0	0	0	0	0	0	0	0	0
P	6207	151.113	8.58674		150.106					0	0	0	0	0	0	0	0	0	0	0	0	0	0	0	0	0	0	0	0	0	0	0	0	0	0	0	0	0	0	0	0	0	0	0	0	0	0	0	0
P	2759	151.115	1.72257	C7H18OS	150.108					1731.58	0	0	0	0	0	2896.36	1065.56	0	1045.22	1850.29	2033.96	0	0	162132	0	0	0	0	223677	205504	0	179762	0	0	0	0	4491.22	0	2550.05	0	3172.85	1136.41	0	0	0	1065.01	0	0	0
P	5819	151.116	8.59195	C7H18OS	150.108					0	0	0	0	0	0	0	0	0	0	0	0	0	0	0	0	0	0	0	0	0	0	0	0	0	0	0	0	0	0	0	0	0	0	0	0	0	0	0	159643
P	3342	151.116	1.73682	H10N10	150.109		2,3-Diethyl-5-methylpyrazine	C9H14N2	Present in galbanum oil	0	0	0	0	0	0	0	0	0	0	0	0	0	0	0	0	0	0	0	0	0	160888	0	0	0	0	0	0	0	0	0	0	0	0	0	0	0	0	0	0
P	2921	151.117	1.78131	H10N10	150.11		5,6-Dihydro-3-isopropyl-4H-pyrrolo[1,2-b]pyrazole	C9H14N2	Prod. by Streptomyces sp. 5B	0	0	0	0	0	0	0	0	0	0	0	0	0	0	0	131840	0	0	0	0	0	0	0	140970	148607	0	0	0	0	0	0	0	0	0	0	0	0	0	0	0
P	5526	151.118	8.59257		150.11		3,5-Dimethyl-2-propylpyrazine	C9H14N2	Present in cocoa. Prod. by Corynebacterium glutamicum	0	0	0	0	0	0	0	0	0	0	0	0	0	0	0	0	0	0	0	0	0	0	0	0	0	0	0	0	0	0	0	0	0	0	0	0	0	0	128859	0
P	3054	151.119	1.77048	C4H14N4O2	150.112		Ethyltrimethylpyrazine	C9H14N2	Prod. by various marine bacteria	0	0	0	0	0	0	0	0	0	0	0	0	0	0	0	0	113628	0	0	0	0	0	0	0	0	0	0	0	0	0	0	0	0	0	0	0	0	0	0	0
P	5236	151.119	8.58836	C4H14N4O2	150.112		Nonanedioic acid; Dinitrile	C9H14N2		0	0	0	0	0	0	0	0	0	0	0	0	0	0	0	0	0	0	0	0	0	0	0	0	0	0	0	0	0	0	0	0	0	0	0	0	0	98381.5	0	0
P	6538	151.12	8.59211	C4H14N4O2	150.113					0	0	0	0	0	0	0	0	0	0	0	0	0	0	0	0	0	0	0	0	0	0	0	0	0	0	0	0	0	0	0	0	0	0	0	0	0	0	0	0
P	2674	151.121	1.77607		150.113					0	0	0	0	0	0	0	0	0	0	0	0	0	83381.7	0	0	0	95261.3	82973	0	0	0	0	0	0	0	0	0	0	0	0	0	0	0	0	0	0	0	0	0
P	3244	151.122	1.75121		150.115					0	0	0	0	0	0	2379.87	0	0	0	0	2185.06	543.042	91007.4	60808.9	0	0	0	88423.2	77263.4	74634	0	0	0	0	0	0	0	0	0	0	1750.76	1808.95	0	0	0	2586.4	0	0	0
P	3406	151.123	1.65172	C9H14N2	150.116	0.283966				1021.71	0	0	0	0	0	0	2212.86	0	2548.39	2105.84	0	0	0	60808.9	0	0	0	0	0	74634	57272.9	62442.2	0	0	1698.86	0	3010.23	0	3799.7	0	1182.37	1941.27	1033.21	0	0	3676.14	0	0	2520.68
							Glycine; N-Chloroacetyl	C4H6ClNO3
P	3383	152.002	9.69168	C3H5NO4S	150.994					0	0	0	0	0	0	0	0	0	0	0	0	0	0	0	0	0	0	0	0	0	61046.7	0	0	0	0	0	0	0	0	0	0	0	0	0	0	0	0	0	0
P	2995	152.003	9.72544	C2H6N3OPS	150.996					0	0	0	0	0	0	0	0	0	0	0	0	0	0	0	67780.7	0	0	0	0	0	0	0	85358.3	0	0	0	0	0	0	0	0	0	0	0	0	0	0	0	0
P	3106	152.005	9.72639	HN5O5	150.998					0	0	0	0	0	0	0	0	0	0	0	0	0	0	0	0	70959.2	0	0	0	0	0	0	0	0	0	0	0	0	0	0	0	0	0	0	0	0	0	0	0
P	3147	152.006	9.73169	CH5N5S2	150.999					0	0	0	0	0	0	0	0	0	0	0	0	0	0	0	0	0	83343.8	0	0	0	0	0	0	0	0	0	0	0	0	0	0	0	0	0	0	0	0	0	0
P	1326	152.007	9.99296		151		2-Benzothiazolol	C7H5NOS	Prod. by a Micrococcus sp. found in Tedania ignis. Isol. from Cucumis sativus (cucumber)	2602.67	0	0	0	0	61156.3	65272.9	0	0	0	0	60444.6	23569.1	84455	0	0	0	0	87059.7	89708.2	0	0	0	0	0	0	0	72918.7	0	0	0	0	0	65287.2	0	0	58774.3	0	0	0
P	2156	152.009	9.72214	C5HN3O3	151.001		2-Benzothiazolol; OH-form	C7H5NOS		0	0	0	0	0	0	0	72355.5	0	69898	64005.1	0	0	0	98396.2	0	0	0	0	0	94923.9	0	92383.2	0	0	109798	0	0	0	0	0	0	0	0	0	0	0	0	0	94444.1
P	2484	152.01	9.71988	C5HN3O3	151.003					0	0	0	0	0	0	0	0	66219	0	0	0	0	0	0	0	0	0	0	0	0	97265.8	0	0	95509.2	0	0	0	0	0	0	0	0	0	0	0	0	0	0	0
P	2952	152.011	9.72583	C3H6NO4P	151.004	1.62334				0	0	0	0	0	0	0	0	0	0	0	0	0	0	0	96287.5	0	0	0	0	0	0	0	97898.8	0	0	0	0	0	0	0	0	0	0	0	0	0	0	102113	0
P	555	152.013	9.71321	C2H5N3O3S	151.005					0	64281.8	79249.7	74646	76596.8	0	0	0	0	0	0	0	0	0	0	0	95518.3	0	0	0	0	0	0	0	0	0	91880.5	0	64896.7	0	0	64750.2	0	0	67773	0	0	100206	0	0
P	2595	152.014	9.71768	C2H7N3OP2	151.006					0	0	0	0	0	0	0	0	0	0	0	0	66568	0	0	0	0	99018.7	0	0	0	0	0	0	0	0	0	0	0	0	63995.3	0	60503.4	0	0	0	0	0	0	0
P	1282	152.015	10.0367	CH6N5PS	151.008					2086.22	0	0	0	0	73076.5	69257.9	0	0	0	0	67552	0	94272.2	0	0	0	0	96476.8	95000.9	0	0	0	0	0	0	0	66957.6	0	21164.7	0	0	0	66083.6	0	0	67247.5	0	0	0
P	2173	152.017	9.72214	C7H5NOS	151.009	0.630333				0	0	0	0	0	0	0	70334.3	0	66663.6	62497.7	0	0	0	89375	0	0	0	0	0	95038	0	85890.4	0	0	90756.5	0	0	0	0	0	0	0	0	0	0	0	0	0	92093.4
P	2499	152.018	9.71988		151.01					0	0	0	0	0	0	0	0	65903	0	0	0	0	0	0	0	0	0	0	0	0	86163.7	0	0	83967.7	0	0	0	0	0	0	0	0	0	0	0	0	0	0	0
P	2973	152.019	9.72583	C3H5NO6	151.012					0	0	0	0	0	0	0	0	0	0	0	0	0	0	0	79879.1	0	0	0	0	0	0	0	69595.3	0	0	0	0	0	0	0	0	0	0	0	0	0	0	87588.6	0
P	678	152.02	9.72159	C4HN5O2	151.013		2-Acetyl-3-hydroxy-5-methylpyridine	C8H9NO2	Constit. of Abelmoschus moschatus (ambrette) seeds	0	0	67377.6	0	0	0	0	0	0	0	0	0	0	0	0	0	74260.4	0	0	0	0	0	0	0	0	0	0	0	0	0	0	0	0	0	0	0	0	81661.7	0	0
P	2709	152.022	9.85698	C2H6N3O3P	151.015		4-Acetyl-6-methyl-2(1H)-pyridinone	C8H9NO2	Prod. by a marine-derived Streptomyces sp. KORDI-3238	2385.04	0	0	0	7362.01	60227.4	0	0	0	0	0	0	60841.6	71605.1	0	0	0	72264.5	67182.3	0	0	0	0	0	0	0	0	0	0	0	53631.3	0	54820.2	0	0	0	49409.6	0	0	0
P	3262	152.023	9.92717	CH5N5O2S	151.016		4-Aminobenzoic acid; N-Me	C8H9NO2		2385.04	0	0	0	0	0	55999.2	0	0	8794.69	49795.3	55601	0	76665.3	3946.94	0	0	0	74565.6	64896.5	68105	0	0	0	0	49038.8	0	49797.6	0	45901.3	0	0	0	52933.1	0	0	49409.6	0	0	0
P	4050	152.059	9.62634	C2H9N5OS	151.052		2-Amino-4'-hydroxyacetophenone	C8H9NO2		0	0	0	0	0	0	0	0	0	0	0	0	0	0	0	0	0	0	0	0	0	0	0	0	0	0	78761.7	0	73644.7	0	0	0	0	0	0	0	0	0	0	0
P	4547	152.06	9.62631	C2H9N5OS	151.053		2-Aminophenol; N-Ac	C8H9NO2	Prod. by a Streptomyces sp. and from a co-culture of marine-derived Actinokineospora sp. EG49 and Nocardiopsis sp. RV163	0	0	0	0	0	0	0	0	0	0	0	0	0	0	0	0	0	0	0	0	0	0	0	0	0	0	0	0	0	0	90670.5	69877.9	71947.6	0	0	0	0	0	0	0
P	3696	152.064	9.63204		151.056		4-Aminophenol; N-Ac	C8H9NO2	Reported to be isol. from Agriophyllum squarrosum and Stephanospora caroticolor	0	0	0	0	0	0	0	0	0	0	0	0	0	0	0	0	0	0	0	0	0	0	0	0	0	95678.7	0	0	0	81237.9	0	0	0	0	0	72936.1	0	0	0	0
P	3997	152.067	9.63202	C3H9N3O4	151.06		4-Aminophenol; O-Ac	C8H9NO2		0	0	0	0	0	0	0	0	0	0	0	0	0	0	0	0	0	0	0	0	0	0	0	0	0	0	98448.2	0	93843.9	0	0	0	0	0	73925.3	0	0	0	0	0
P	4542	152.068	9.62631	C4H5N7	151.061		2-Amino-2-phenylacetic acid; (S)-form	C8H9NO2		0	0	0	0	0	0	0	0	0	0	0	0	0	0	0	0	0	0	0	0	0	0	0	0	0	0	0	0	0	0	90716.6	80539.5	79508.4	0	0	0	0	0	0	0
P	4300	152.07	9.99289	C8H9NO2	151.063	-2.64544	(4-Hydroxyphenyl)acetaldehyde; Oxime	C8H9NO2	Isol. from Streptomyces nigellus	1410.41	0	0	0	0	20215.9	13503.9	0	0	0	19465.3	20373.4	0	28762.4	0	0	0	0	28246.6	19191.4	26916.1	0	0	0	0	0	0	95246.3	0	80702.1	0	0	0	72019.2	0	0	70494.3	0	0	0
P	3732	152.071	9.63204	CH9N7S	151.064					0	0	0	0	0	0	0	0	0	0	0	0	0	0	0	0	0	0	0	0	0	0	0	0	0	83793.5	0	0	0	76739.3	0	0	0	0	0	69793.8	0	0	0	0
P	4068	152.075	9.62634	C5H15NP2	151.068		Benzaldehyde; Di-Me acetal	C9H12O2	Present in rhubarb and potato	0	0	0	0	0	0	0	0	0	0	0	0	0	0	0	0	0	0	0	0	0	0	0	0	0	0	73865.3	0	68378.2	0	0	0	0	0	0	0	0	0	0	0
P	3973	153.082	8.85932		152.074		1,2-Benzenediol; Monoisopropyl ether	C9H12O2		0	0	0	0	0	0	0	0	0	0	0	0	0	0	0	0	0	0	0	0	0	0	0	0	0	0	198019	0	151168	0	0	0	0	0	139098	0	0	181665	0	0
P	4536	153.083	8.85624	C9H13P	152.075		1,4-Benzenediol; Monopropyl ether	C9H12O2	Prod. by the marine-derived Bacillus amyloliquefaciens SCSIO 00856	0	0	0	0	0	0	0	0	0	0	0	0	0	0	0	0	0	0	0	0	0	0	0	0	0	0	0	0	0	0	191544	182032	192565	0	0	0	0	0	0	0
P	4199	153.085	9.28169	H8N8O2	152.077		Boschnialactone; 7,8-Didehydro	C9H12O2	Constit. of Monochasma savatieri	4792.61	0	0	0	0	8943.51	16778.4	0	0	0	16613.6	14519.7	0	23706	0	0	0	0	23534.5	26822.5	26723.5	0	0	0	0	0	0	281920	0	65272.4	0	0	0	267155	0	0	257452	0	0	0
P	3558	153.086	8.85574	C6H17PS	152.079		2,5-Dimethyl-1,4-benzenediol; Me ether	C9H12O2		0	0	0	0	0	0	0	0	0	0	0	0	0	0	0	0	0	0	0	0	0	0	0	0	0	390259	0	0	0	283980	0	0	0	0	0	388832	0	0	0	395381
P	5462	153.088	8.8761	C5H8N6	152.081		2,6-Dimethyl-1,4-benzenediol; 4-Me ether	C9H12O2		0	0	0	0	0	0	0	0	0	0	0	0	0	0	0	0	0	0	0	0	0	0	0	0	0	0	0	0	0	0	0	0	0	0	0	0	0	0	467796	0
P	3845	153.09	8.85932	C3H13N4OP	152.082		4,5-Dimethyl-1,3-benzenediol; 3-Me ether	C9H12O2		0	0	0	0	0	0	0	0	0	0	0	0	0	0	0	0	0	0	0	0	0	0	0	0	0	0	537586	0	462097	0	0	0	0	0	488220	0	0	569390	0	0
P	6602	153.09	7.35763	C3H13N4OP	152.083		4-Ethyl-1,2-benzenediol; 2-Me ether	C9H12O2	Constit. of numerous plant spp. Isol. from the cockroach Nauphoeta cinerea	0	0	0	0	0	0	0	0	0	0	0	0	0	0	0	0	0	0	0	0	0	0	0	0	0	0	0	0	0	0	0	0	0	0	0	0	0	0	0	0
P	4526	153.091	8.85624	C9H12O2	152.083	-2.52085	4,5,6-Trimethyl-1,3-benzenediol	C9H12O2	Prod. by Penicillium baarnense	0	0	0	0	0	0	0	0	0	0	0	0	0	0	0	0	0	0	0	0	0	0	0	0	0	0	0	0	0	0	507223	530295	483965	0	0	0	0	0	0	0
P	6413	153.091	7.33024	C9H12O2	152.084					0	0	0	0	0	0	0	0	0	0	0	0	0	0	0	0	0	0	0	0	0	0	0	0	0	0	0	0	0	0	0	0	0	0	0	0	0	0	0	0
P	4128	153.093	9.32815	C2H12N6S	152.085					3951.58	0	0	0	0	27025.8	47078.5	0	0	0	27565.2	25280.3	0	40375.1	0	0	0	0	43068.1	44638	46132.6	0	0	0	0	0	0	584702	0	89364.4	0	0	0	684409	0	0	555845	0	0	0
P	5970	153.094	7.34934	C6H16O2S	152.087					0	0	0	0	0	0	0	0	0	0	0	0	0	0	0	0	0	0	0	0	0	0	0	0	0	0	0	0	0	0	0	0	0	0	0	0	0	0	0	178895
P	3502	153.094	8.85574	C6H16O2S	152.087					0	0	0	0	0	0	0	0	0	0	0	0	0	0	0	0	0	0	0	0	0	0	0	0	0	690153	0	0	0	588486	0	0	0	0	0	698683	0	0	0	793508
P	5598	153.096	7.34162	C6H18P2	152.089					0	0	0	0	0	0	0	0	0	0	0	0	0	0	0	0	0	0	0	0	0	0	0	0	0	0	0	0	0	0	0	0	0	0	0	0	0	0	183382	0
P	5419	153.096	8.8761	C6H18P2	152.089					0	0	0	0	0	0	0	0	0	0	0	0	0	0	0	0	0	0	0	0	0	0	0	0	0	0	0	0	0	0	0	0	0	0	0	0	0	0	794817	0
P	3822	153.097	8.85932	C3H12N4O3	152.09					0	0	0	0	0	0	0	0	0	0	0	0	0	0	0	0	0	0	0	0	0	0	0	0	0	0	716312	0	751352	0	0	0	0	0	756115	0	0	840900	0	0
P	5240	153.098	7.34815	C3H12N4O3	152.09					0	0	0	0	0	0	0	0	0	0	0	0	0	0	0	0	0	0	0	0	0	0	0	0	0	0	0	0	0	0	0	0	0	0	0	0	0	175584	0	0
P	4523	153.099	8.85902	C3H12N4O3	152.091					0	0	0	0	0	0	0	0	0	0	0	0	0	0	0	0	0	0	0	0	0	0	0	0	0	0	0	0	0	0	634554	749777	711877	0	0	0	0	0	0	0
P	6329	153.099	7.33024	C3H12N4O3	152.092					0	0	0	0	0	0	0	0	0	0	0	0	0	0	0	0	0	0	0	0	0	0	0	0	0	0	0	0	0	0	0	0	0	0	0	0	0	0	0	0
P	4123	153.1	9.26262	C2H13N6P	152.093					3618.79	0	0	0	0	31296.3	32801.1	0	0	0	29307.2	29220.2	0	46641	0	0	0	0	50132.1	48565	46831.2	0	0	0	0	0	0	617281	0	91962.6	0	0	0	592490	0	0	656870	0	0	0
P	5950	153.102	7.34934	C8H12N2O	152.094					0	0	0	0	0	0	0	0	0	0	0	0	0	0	0	0	0	0	0	0	0	0	0	0	0	0	0	0	0	0	0	0	0	0	0	0	0	0	0	170962
P	3503	153.102	8.85574	C8H12N2O	152.094					0	0	0	0	0	0	0	0	0	0	0	0	0	0	0	0	0	0	0	0	0	0	0	0	0	653443	0	0	0	675338	0	0	0	0	0	685318	0	0	0	805291
P	5618	153.104	7.34162	C6H17O2P	152.097					0	0	0	0	0	0	0	0	0	0	0	0	0	0	0	0	0	0	0	0	0	0	0	0	0	0	0	0	0	0	0	0	0	0	0	0	0	0	160022	0
P	5422	153.104	8.8761	C6H17O2P	152.097					0	0	0	0	0	0	0	0	0	0	0	0	0	0	0	0	0	0	0	0	0	0	0	0	0	0	0	0	0	0	0	0	0	0	0	0	0	0	734791	0
P	3841	153.105	8.8617	C5H16N2OS	152.098					0	0	0	0	0	0	0	0	0	0	0	0	0	0	0	0	0	0	0	0	0	0	0	0	0	0	558312	0	608327	0	0	0	0	0	537909	0	0	682560	0	0
P	5315	153.105	7.34995	C5H16N2OS	152.098					0	0	0	0	0	0	0	0	0	0	0	0	0	0	0	0	0	0	0	0	0	0	0	0	0	0	0	0	0	0	0	0	0	0	0	0	0	148569	0	0
P	6539	153.106	7.34951	C5H16N2OS	152.099					0	0	0	0	0	0	0	0	0	0	0	0	0	0	0	0	0	0	0	0	0	0	0	0	0	0	0	0	0	0	0	0	0	0	0	0	0	0	0	0
P	4527	153.106	8.85902	C5H16N2OS	152.099					0	0	0	0	0	0	0	0	0	0	0	0	0	0	0	0	0	0	0	0	0	0	0	0	0	0	0	0	0	0	489660	616277	467956	0	0	0	0	0	0	0
P	4157	153.108	9.26024		152.101					2779.29	0	0	0	0	22654.1	22236	0	0	0	20259.4	21311.4	0	33756.1	0	0	0	0	39552.3	36205.5	34099	0	0	0	0	0	0	399299	0	109479	0	0	0	408533	0	0	416400	0	0	0
P	3542	153.11	8.85574	C2H12N6O2	152.102					0	0	0	0	0	0	0	0	0	0	0	0	0	0	0	0	0	0	0	0	0	0	0	0	0	392570	0	0	0	392126	0	0	0	0	0	372796	0	0	0	443457
P	5449	153.112	8.8761	C6H16O4	152.105					0	0	0	0	0	0	0	0	0	0	0	0	0	0	0	0	0	0	0	0	0	0	0	0	0	0	0	0	0	0	0	0	0	0	0	0	0	0	389465	0
P	3895	153.113	8.85932	C7H12N4	152.106					0	0	0	0	0	0	0	0	0	0	0	0	0	0	0	0	0	0	0	0	0	0	0	0	0	0	298489	0	355716	0	0	0	0	0	315403	0	0	356888	0	0
P	4529	153.114	8.85902	C7H12N4	152.107					0	0	0	0	0	0	0	0	0	0	0	0	0	0	0	0	0	0	0	0	0	0	0	0	0	0	0	0	0	0	301617	288191	277219	0	0	0	0	0	0	0
P	4216	153.116	9.32815	C4H16N4S	152.109					6407.79	0	0	0	0	15783.3	22953.6	0	0	0	14624.5	16937.2	0	21383.4	0	0	0	0	23323.3	23669.4	22092.5	0	0	0	0	0	0	246455	0	64130.9	0	0	0	237203	0	0	249950	0	0	0
P	3611	153.118	8.85574	C4H16N4S	152.11					0	0	0	0	0	0	0	0	0	0	0	0	0	0	0	0	0	0	0	0	0	0	0	0	0	234081	0	0	0	249253	0	0	0	0	0	228376	0	0	0	267660
P	5521	153.12	8.8761	CH12N8O	152.112					0	0	0	0	0	0	0	0	0	0	0	0	0	0	0	0	0	0	0	0	0	0	0	0	0	0	0	0	0	0	0	0	0	0	0	0	0	0	233143	0
P	3963	153.121	8.8617	CH12N8O	152.114					0	0	0	0	0	0	0	0	0	0	0	0	0	0	0	0	0	0	0	0	0	0	0	0	0	0	199638	0	224653	0	0	0	0	0	191923	0	0	212377	0	0
P	4539	153.122	8.85902		152.115					0	0	0	0	0	0	0	0	0	0	0	0	0	0	0	0	0	0	0	0	0	0	0	0	0	0	0	0	0	0	181556	180675	172836	0	0	0	0	0	0	0
P	3721	153.125	8.85064	C4H17N4P	152.118					0	0	0	0	0	0	0	0	0	0	0	0	0	0	0	0	0	0	0	0	0	0	0	0	0	164999	0	0	0	146603	0	0	0	0	0	151472	0	0	0	169513
P	6360	155.051	4.01796	C2H11N4PS	154.044		1-Isoquinolinecarboxylic acid; Nitrile	C10H6N2	Prod. by Myxococcus virescens - S149	0	0	0	0	3594.99	19858.5	38473.9	0	0	0	0	40785.6	19409.7	49199.4	0	0	0	19154.8	40902.9	52881.6	0	0	0	0	0	0	15611.2	0	0	0	39094	52700.8	46779	0	0	0	37624.5	0	0	0
P	2857	155.053	3.53839	C8H10OS	154.046		4-Quinolinecarboxylic acid; Nitrile	C10H6N2		2679.34	0	0	0	0	0	38473.9	3726.72	0	59169.8	57571.7	40785.6	0	0	242285	0	0	0	0	52881.6	71018	0	116780	0	0	0	0	98918.3	0	101975	0	52700.8	46779	102058	0	0	64176.8	0	0	131355
P	3370	155.054	3.19322	CH2N10	154.047					0	0	0	0	0	0	0	0	0	0	0	0	0	0	0	0	0	0	0	0	0	270130	0	0	305875	0	0	0	0	0	0	0	0	0	0	0	0	0	0	271211
P	2960	155.055	3.21308	C4H10O6	154.048					0	0	0	0	0	0	0	0	0	0	0	0	0	0	0	361124	0	0	0	0	0	0	0	374481	0	0	0	0	0	0	0	0	0	0	0	0	0	0	397751	0
P	603	155.057	2.33732	C5H6N4O2	154.05					0	0	210700	0	0	0	0	0	0	0	0	0	0	0	0	0	0	0	0	0	0	0	0	0	0	0	0	0	0	0	0	0	0	0	0	0	0	0	0	0
P	773	155.057	3.20709	C3H11N2O3P	154.05					0	0	0	339651	0	0	0	0	0	0	0	0	0	0	0	0	498621	0	0	0	0	0	0	0	0	0	0	0	0	0	0	0	0	0	491461	0	0	629885	0	0
P	391	155.058	3.20325	C3H11N2O3P	154.051					0	405622	0	0	383103	471494	0	0	0	0	0	0	486605	787082	0	0	0	666693	0	0	0	0	0	0	0	0	737411	0	538746	0	808085	0	0	0	0	0	0	0	0	0
P	6107	155.059	4.03151	C2H10N4O2S	154.052					0	0	0	0	4552.09	216045	276637	0	0	0	0	84036.1	246366	425898	0	0	0	340096	441383	516083	0	0	0	0	0	0	137505	0	0	0	417343	454045	514884	0	0	0	281771	0	0	0
P	1563	155.06	3.58605	C10H6N2	154.053	-1.71352				5119.07	0	0	0	0	0	591274	0	0	0	0	584064	246366	425898	773174	0	0	0	821304	958306	574850	0	0	0	0	0	0	0	0	0	0	1.00809e+06	946625	0	0	0	901049	0	0	0
P	1947	155.061	3.20802	C2H12N4P2	154.054					0	0	0	0	0	0	0	748023	0	764341	663943	0	0	0	1.3689e+06	0	0	0	0	0	1.09548e+06	0	1.30431e+06	0	0	0	0	1.32048e+06	0	0	0	0	0	1.22472e+06	0	0	0	0	0	1.6581e+06
P	3331	155.062	3.19232	C8H11OP	154.055					0	0	0	0	0	0	0	0	0	0	0	0	0	0	0	0	0	0	0	0	0	1.54326e+06	0	0	0	1.51126e+06	0	0	0	1.34803e+06	0	0	0	0	0	1.31037e+06	0	0	0	0
P	2324	155.063	3.21581	C7H10N2S	154.056					0	0	0	0	0	0	0	0	885351	0	0	0	0	0	0	1.74039e+06	0	0	0	0	0	0	0	1.80891e+06	1.6214e+06	0	0	0	0	0	0	0	0	0	0	0	0	0	2.07878e+06	0
P	573	155.065	2.33732	C5H15OPS	154.058					0	0	825137	0	0	0	0	0	0	0	0	0	0	0	0	0	0	0	0	0	0	0	0	0	0	0	0	0	0	0	0	0	0	0	0	0	0	0	0	0
P	704	155.065	3.20709	C5H15OPS	154.058					0	0	0	1.31242e+06	0	0	0	0	0	0	0	0	0	0	0	0	2.08511e+06	0	0	0	0	0	0	0	0	0	0	0	0	0	0	0	0	0	1.97739e+06	0	0	2.69461e+06	0	0
P	183	155.066	3.20325	C3H10N2O5	154.059					0	1.4291e+06	0	0	1.44285e+06	1.55211e+06	0	0	0	0	0	0	1.57279e+06	2.5793e+06	0	0	0	2.43605e+06	0	0	0	0	0	0	0	0	2.53079e+06	0	2.23932e+06	0	2.6794e+06	0	0	0	0	0	0	0	0	0
P	6089	155.067	4.09662	C4H14N2S2	154.06					0	0	0	0	3227.5	816040	952074	0	0	0	0	0	867562	1.50534e+06	0	0	0	1.22852e+06	1.50065e+06	1.65709e+06	0	0	0	0	0	0	834613	0	0	0	1.35735e+06	1.6904e+06	1.51251e+06	0	0	0	885283	0	0	0
P	1414	155.068	3.58605	C4H6N6O	154.061					6874.53	0	0	0	0	0	1.73407e+06	0	0	0	0	1.76054e+06	867562	1.50534e+06	1.88229e+06	0	0	0	2.69623e+06	2.95455e+06	1.62693e+06	0	0	0	0	0	0	0	0	0	0	2.9646e+06	2.81299e+06	0	0	0	2.62735e+06	0	0	0
P	1842	155.069	3.2062	C2H11N4O2P	154.062					0	0	0	0	0	0	0	1.93986e+06	0	1.9459e+06	1.83438e+06	0	0	0	3.34349e+06	0	0	0	0	0	3.1188e+06	0	3.34931e+06	0	0	0	0	3.35394e+06	0	3.36416e+06	0	0	0	3.17747e+06	0	0	0	0	0	4.51043e+06
P	2269	155.071	3.21031	CH10N6OS	154.064					0	0	0	0	0	0	0	0	2.07579e+06	0	0	0	0	0	0	3.74191e+06	0	0	0	0	0	3.65441e+06	0	3.80603e+06	3.64475e+06	3.61427e+06	0	0	0	0	0	0	0	0	0	3.13609e+06	0	0	4.97497e+06	0
P	569	155.073	2.33732	C7H11N2P	154.066					0	0	1.56874e+06	0	0	0	0	0	0	0	0	0	0	0	0	0	0	0	0	0	0	0	0	0	0	0	0	0	0	0	0	0	0	0	0	0	0	0	0	0
P	695	155.073	3.20709	C7H11N2P	154.066					0	0	0	2.48758e+06	0	0	0	0	0	0	0	0	0	0	0	0	3.96465e+06	0	0	0	0	0	0	0	0	0	0	0	0	0	0	0	0	0	3.68743e+06	0	0	5.47599e+06	0	0
P	144	155.074	3.20325	C5H16OP2	154.067					0	2.46392e+06	0	0	2.58628e+06	2.53287e+06	0	0	0	0	0	0	2.5251e+06	4.11132e+06	0	0	0	4.1648e+06	0	0	0	0	0	0	0	0	4.11111e+06	0	4.0952e+06	0	4.19544e+06	0	0	0	0	0	0	0	0	0
P	6087	155.075	4.03568	C5H16OP2	154.068					0	0	0	0	7362.76	1.33611e+06	1.40599e+06	0	0	0	0	200042	1.33444e+06	2.60647e+06	0	0	0	1.99433e+06	2.34412e+06	2.4622e+06	0	0	0	0	0	0	910176	0	0	0	2.13218e+06	2.42037e+06	2.21817e+06	0	0	0	1.30278e+06	0	0	0
P	1394	155.076	3.58605	C4H15N2PS	154.069					13373.8	0	0	0	0	0	2.6041e+06	0	0	0	0	2.62868e+06	1.33444e+06	2.60647e+06	2.55258e+06	0	0	0	4.20729e+06	4.40931e+06	2.26163e+06	0	0	0	0	0	0	0	0	0	0	4.24852e+06	4.0771e+06	0	0	0	3.89074e+06	0	0	0
P	1829	155.077	3.20802	C2H10N4O4	154.07		Biphenyl	C12H10	Occurs in various vegetable sources, e.g. carrots, peas, tomato	0	0	0	0	0	0	0	2.59153e+06	0	2.55377e+06	2.57051e+06	0	0	0	4.19123e+06	0	0	0	0	0	4.37329e+06	0	4.33373e+06	0	0	0	0	4.23637e+06	0	0	0	0	0	4.06007e+06	0	0	0	0	0	6.17518e+06
P	3326	155.078	3.19648	C2H10N4O4	154.071		2,4-Dodecadiene-6,8,10-triyne; (Z,Z)-form	C12H10	Isol. from Tagetes tenuifolia	0	0	0	0	0	0	0	0	0	0	0	0	0	0	0	0	0	0	0	0	0	4.40282e+06	0	0	0	4.40288e+06	0	0	0	4.21037e+06	0	0	0	0	0	3.9455e+06	0	0	0	0
P	2259	155.079	3.21581	C3H6N8	154.072		1-Phenyl-1,3-hexadiyne	C12H10	Constit. of Artemisia capillaris	0	0	0	0	0	0	0	0	2.51764e+06	0	0	0	0	0	0	4.17431e+06	0	0	0	0	0	0	0	4.1729e+06	4.21171e+06	0	0	0	0	0	0	0	0	0	0	0	0	0	6.15299e+06	0
P	568	155.081	2.33732	CH11N6OP	154.074					0	0	1.55786e+06	0	0	0	0	0	0	0	0	0	0	0	0	0	0	0	0	0	0	0	0	0	0	0	0	0	0	0	0	0	0	0	0	0	0	0	0	0
P	694	155.081	3.20709	CH11N6OP	154.074					0	0	0	2.49052e+06	0	0	0	0	0	0	0	0	0	0	0	0	4.00514e+06	0	0	0	0	0	0	0	0	0	0	0	0	0	0	0	0	0	3.74847e+06	0	0	5.89693e+06	0	0
P	154	155.082	3.20325	H10N8S	154.075					0	2.30374e+06	0	0	2.51302e+06	2.29394e+06	0	0	0	0	0	0	2.25052e+06	3.64521e+06	0	0	0	3.88725e+06	0	0	0	0	0	0	0	0	3.72728e+06	0	3.99212e+06	0	3.68351e+06	0	0	0	0	0	0	0	0	0
P	6088	155.083	4.07111	C5H15O3P	154.076					0	0	0	0	2014.2	1.21546e+06	1.18894e+06	0	0	0	0	1.06992e+06	1.19153e+06	2.32105e+06	0	0	0	1.86288e+06	2.05379e+06	2.08147e+06	0	0	0	0	0	0	698143	0	0	0	2.23386e+06	2.00053e+06	2.02559e+06	0	0	0	1.18015e+06	0	0	0
P	1403	155.084	3.52839	C5H15O3P	154.077					3305.8	0	0	0	0	0	2.17689e+06	0	0	0	0	2.23081e+06	1.19153e+06	2.32105e+06	1.99216e+06	0	0	0	3.69004e+06	3.70073e+06	1.81755e+06	0	0	0	0	0	0	0	0	0	82268.7	3.48097e+06	3.3832e+06	0	0	0	3.27557e+06	0	0	0
P	1839	155.085	3.21023	C4H14N2O2S	154.078	-2.96153	4-Imino-1-[(1-iminoethyl)amino]-2-pyrrolidinone	C6H10N4O	Alkaloid from Schizonepeta multifida	0	0	0	0	0	0	0	2.02381e+06	0	1.96806e+06	2.07795e+06	0	0	0	3.12255e+06	0	0	0	0	0	3.52198e+06	0	3.3083e+06	0	0	0	0	0	0	0	0	0	0	3.12841e+06	0	0	0	0	0	4.8567e+06
P	3328	155.086	3.19148	C4H16N2P2	154.079					0	0	0	0	0	0	0	0	0	0	0	0	0	0	0	0	0	0	0	0	0	3.20514e+06	0	0	0	3.28619e+06	0	3.20949e+06	0	3.17137e+06	0	0	0	0	0	2.95845e+06	0	0	0	0
P	2273	155.087	3.21581	C4H16N2P2	154.08					0	0	0	0	0	0	0	0	1.85373e+06	0	0	0	0	0	0	2.91729e+06	0	0	0	0	0	0	0	2.86559e+06	2.97981e+06	0	0	0	0	0	0	0	0	0	0	0	0	0	4.50755e+06	0
P	570	155.089	2.33732	CH10N6O3	154.081					0	0	1.04815e+06	0	0	0	0	0	0	0	0	0	0	0	0	0	0	0	0	0	0	0	0	0	0	0	0	0	0	0	0	0	0	0	0	0	0	0	0	0
P	702	155.089	3.20709	C9H14S	154.082					0	0	0	1.6678e+06	0	0	0	0	0	0	0	0	0	0	0	0	2.66745e+06	0	0	0	0	0	0	0	0	0	0	0	0	0	0	0	0	0	2.50013e+06	0	0	4.06911e+06	0	0
P	181	155.09	3.20325		154.083					0	1.48066e+06	0	0	1.65282e+06	1.46256e+06	0	0	0	0	0	0	1.41707e+06	2.29952e+06	0	0	0	2.48615e+06	0	0	0	0	0	0	0	0	2.36073e+06	0	2.62158e+06	0	2.29523e+06	0	0	0	0	0	0	0	0	0
P	6090	155.091	4.0388	C5H14O5	154.084					0	0	0	0	4283.79	776103	674278	0	0	0	0	55354.2	753187	1.41486e+06	0	0	0	1.197e+06	1.29488e+06	1.2913e+06	0	0	0	0	0	0	524929	0	0	0	1.39657e+06	1.2374e+06	1.25637e+06	0	0	0	784181	0	0	0
P	1442	155.092	3.60869	H11N8P	154.085					2338.87	0	0	0	0	0	1.34067e+06	0	0	0	0	1.3747e+06	753187	1.41486e+06	1.20346e+06	0	0	0	2.30955e+06	2.29295e+06	1.11583e+06	0	0	0	0	0	0	0	0	0	0	2.11823e+06	2.08476e+06	0	0	0	2.02582e+06	0	0	0
P	1886	155.093	3.2062	C6H10N4O	154.086	2.26266				0	0	0	0	0	0	0	1.22013e+06	0	1.18717e+06	1.26907e+06	0	0	0	1.87485e+06	0	0	0	0	0	2.15107e+06	0	1.99055e+06	0	0	0	0	1.94174e+06	0	1.89968e+06	0	0	0	1.89456e+06	0	0	0	0	0	3.01665e+06
P	2308	155.095	3.20846	C4H15N2O2P	154.087					0	0	0	0	0	0	0	0	1.10588e+06	0	0	0	0	0	0	1.74394e+06	0	0	0	0	0	1.92564e+06	0	1.70671e+06	1.77957e+06	1.98164e+06	0	0	0	0	0	0	0	0	0	1.7799e+06	0	0	2.75747e+06	0
P	577	155.097	2.33732	C3H14N4OS	154.089					0	0	640170	0	0	0	0	0	0	0	0	0	0	0	0	0	0	0	0	0	0	0	0	0	0	0	0	0	0	0	0	0	0	0	0	0	0	0	0	0
P	714	155.097	3.205	C3H14N4OS	154.09					0	0	0	992897	0	0	0	0	0	0	0	0	0	0	0	0	1.5833e+06	0	0	0	0	0	0	0	0	0	0	0	0	0	0	0	0	0	1.49876e+06	0	0	2.48034e+06	0	0
P	241	155.098	3.20174	C9H15P	154.091					0	881864	0	0	976855	868414	0	0	0	0	0	0	837027	1.3772e+06	0	0	0	1.47597e+06	0	0	0	0	0	0	0	0	1.42283e+06	0	1.57004e+06	0	1.35445e+06	0	0	0	0	0	0	0	0	0
P	6091	155.099	4.08884	C9H15P	154.092		Arbusculone; (2R*,5R*)-form	C9H14O2	Constit. of Artemisia spp.	0	0	0	0	3101.59	463287	437745	0	0	0	0	0	448775	816482	0	0	0	713921	771965	773682	0	0	0	0	0	0	573014	0	0	0	762995	733280	751730	0	0	0	412294	0	0	0
P	1497	155.1	3.54729	H10N8O2	154.092		Arbusculone; (2R*,5S*)-form	C9H14O2	Constit. of Artemisia spp.	3118.45	0	0	0	0	0	793640	0	0	0	0	812834	448775	816482	632467	0	0	0	1.3677e+06	1.35909e+06	664577	0	0	0	0	0	0	0	0	0	55106.1	1.24816e+06	1.23952e+06	0	0	0	1.22883e+06	0	0	0
P	1950	155.101	3.21023	H10N8O2	154.094		Bicyclo[2.2.1]heptan-2-ol; (1RS,2SR,4SR)-form, Ac	C9H14O2		0	0	0	0	0	0	0	720542	0	694571	753953	0	0	0	1.10337e+06	0	0	0	0	0	1.27604e+06	0	1.16839e+06	0	0	0	0	0	0	0	0	0	0	1.12208e+06	0	0	0	0	0	1.83576e+06
P	3333	155.102	3.19148	C4H14N2O4	154.094		Boschnialactone	C9H14O2	Constit. of Boschniakia rossica	0	0	0	0	0	0	0	0	0	0	0	0	0	0	0	0	0	0	0	0	0	1.11717e+06	0	0	0	1.1665e+06	0	1.14547e+06	0	1.10448e+06	0	0	0	0	0	1.06552e+06	0	0	0	0
P	2352	155.103	3.21581	C4H14N2O4	154.096		3-Butyldihydro-4-methylene-2(3H)-furanone; (+)-form, Δ3-Isomer	C9H14O2	Isol. from Geniculosporium sp. 9910, Hypoxylon serpens and a xylariaceous endophytic fungus strain CBS 120381	0	0	0	0	0	0	0	0	643972	0	0	0	0	0	0	1.01159e+06	0	0	0	0	0	0	0	969245	1.0245e+06	0	0	0	0	0	0	0	0	0	0	0	0	0	1.65628e+06	0
P	588	155.105	2.33732	C5H10N6	154.097		3-Butyl-5-methyl-5H-furan-2-one; (S)-form	C9H14O2	Metab. of Streptomyces griseus	0	0	360866	0	0	0	0	0	0	0	0	0	0	0	0	0	0	0	0	0	0	0	0	0	0	0	0	0	0	0	0	0	0	0	0	0	0	0	0	0
P	735	155.105	3.205	C5H10N6	154.097		4-Cyclohepten-1-ol; Ac	C9H14O2		0	0	0	561052	0	0	0	0	0	0	0	0	0	0	0	0	888947	0	0	0	0	0	0	0	0	0	0	0	0	0	0	0	0	0	859214	0	0	1.4447e+06	0	0
P	359	155.106	3.20174	C3H15N4OP	154.099		Dihydro-5-(2-pentenyl)-2(3H)-furanone	C9H14O2		0	483384	0	0	544187	470576	0	0	0	0	0	0	449270	739457	0	0	0	801680	0	0	0	0	0	0	0	0	766339	0	857568	0	703516	0	0	0	0	0	0	0	0	0
P	6102	155.107	4.1322	C9H14O2	154.1	1.22632	4,6,8-Nonatriene-2,3-diol	C9H14O2	Prod. by Aspergillus ochraceus	0	0	0	0	3594.09	253762	234251	0	0	0	0	0	252557	439897	0	0	0	391517	406350	411485	0	0	0	0	0	0	257394	0	0	0	399120	371233	409254	0	0	0	252017	0	0	0
P	1630	155.108	3.61703	C2H14N6S	154.1					2106.01	0	0	0	0	0	414864	0	0	0	0	422758	252557	439897	287655	0	0	0	717390	696486	316923	0	0	0	0	0	0	0	0	0	0	629964	643627	0	0	0	647232	0	0	0
P	2101	155.109	3.20772		154.102					0	0	0	0	0	0	0	361172	0	342626	383635	0	0	0	522433	0	0	0	0	0	636698	0	563506	0	0	0	0	532196	0	512352	0	0	0	559190	0	0	0	0	0	902711
P	2465	155.11	3.2066		154.103					0	0	0	0	0	0	0	0	301266	0	0	0	0	0	0	453261	0	0	0	0	0	510896	0	417552	454533	542117	0	0	0	0	0	0	0	0	0	522820	0	0	793574	0
P	608	155.113	2.33732		154.105					0	0	163476	0	0	0	0	0	0	0	0	0	0	0	0	0	0	0	0	0	0	0	0	0	0	0	0	0	0	0	0	0	0	0	0	0	0	0	0	0
P	3066	155.113	3.20501		154.106					0	0	0	0	0	0	0	0	0	0	0	0	0	0	0	0	373676	0	0	0	0	0	0	0	0	0	0	0	342151	0	0	0	0	0	381867	0	0	637031	0	0
P	2675	155.114	3.20239	C3H14N4O3	154.107					0	0	0	0	0	0	0	0	0	0	0	0	0	301968	0	0	0	321348	272815	0	0	0	0	0	0	0	291546	0	0	0	271502	0	0	0	0	0	0	0	0	0
P	6144	155.115	4.03984	C3H14N4O3	154.108					0	0	0	0	4529.5	86735.8	81590	0	0	0	0	22348.9	97172.4	154844	0	0	0	157432	156987	118642	0	0	0	0	0	0	65902.7	0	0	0	157165	116425	113024	0	0	0	82473.3	0	0	0
P	3264	155.116	3.69688	C2H15N6P	154.109					2518.44	0	0	0	0	0	81590	2530.53	0	0	77433.5	84538	0	0	95851.8	0	0	0	156987	261704	125710	0	0	0	0	0	0	0	0	0	0	116425	257152	3380.92	0	0	250290	0	0	0
P	5905	155.117	3.20403	C2H15N6P	154.11					0	0	0	0	0	0	0	0	0	0	0	0	0	0	0	0	0	0	0	0	0	0	0	0	0	0	0	0	0	0	0	0	0	0	0	0	0	0	0	336451
P	5639	155.119	3.21352	C8H14N2O	154.112					0	0	0	0	0	0	0	0	0	0	0	0	0	0	0	0	0	0	0	0	0	0	0	0	0	0	0	0	0	0	0	0	0	0	0	0	0	0	288497	0
P	6291	155.123	4.03672		154.115					0	0	0	0	4477.5	35188.7	33214.2	0	0	0	0	35980	28869.1	59176.1	0	0	0	47409.7	55794.9	49418.3	0	0	0	0	0	0	13603.5	0	0	0	31695.8	39557.8	50581.9	0	0	0	22881.9	0	0	0
P	6234	156.068	4.16507	C6H10N3P	155.06		4-Amino-2-hydroxy-5-(hydroxymethyl)pyrimidine; OH-form, 2-Me ether	C6H9N3O2	Prod. by Bacillus megaterium and Streptomyces albus	0	0	0	0	5371.13	47353.2	60251.8	0	0	0	0	0	54768.1	100528	0	0	0	73224.1	106895	0	0	0	0	0	0	0	87689.8	0	0	0	86624.2	90546.3	68722.3	0	0	0	50227.1	0	0	0
P	2852	156.069	3.54918	C4H13NO3S	155.062		2-Amino-3-(1-pyrazolyl)propanoic acid; (S)-form	C6H9N3O2	Amino acid present in seeds of Citrullus vulgaris (watermelon) and other members of the Cucurbitaceae	2938.95	0	0	0	0	0	60251.8	3938.58	0	37229	76892.4	52355.1	0	0	261581	0	0	0	0	95054.9	98235.3	0	112343	0	0	0	0	140380	0	0	0	90546.3	68722.3	95635.9	0	0	90967.2	0	0	187254
P	3379	156.07	3.18801	C4H15NOP2	155.063		Histidine; (R)-form	C6H9N3O2		0	0	0	0	0	0	0	0	0	0	0	0	0	0	0	0	0	0	0	0	0	269942	0	0	0	265889	0	256034	0	243083	0	0	0	0	0	250652	0	0	0	344283
P	2991	156.072	3.21139	C3H14N3PS	155.064		Histidine; (±)-form	C6H9N3O2		0	0	0	0	0	0	0	0	0	0	0	0	0	0	0	301298	0	0	0	0	0	0	0	289248	273402	0	0	0	0	0	0	0	0	0	0	0	0	0	392047	0
P	625	156.073	2.33732	CH9N5O4	155.066					0	0	135232	0	0	0	0	0	0	0	0	0	0	0	0	0	0	0	0	0	0	0	0	0	0	0	0	0	0	0	0	0	0	0	0	0	0	0	0	0
P	3089	156.074	3.20497	C2H5N9	155.066					0	0	0	0	0	0	0	0	0	0	0	0	0	0	0	0	312408	0	0	0	0	0	0	0	0	0	0	0	324810	0	0	0	0	0	301921	0	0	443495	0	0
P	2670	156.075	3.20757	H10N7OP	155.068					0	0	0	0	0	0	0	0	0	0	0	0	0	342126	0	0	0	343683	357648	0	0	0	0	0	0	0	343662	0	0	0	339987	0	0	0	0	0	0	0	0	0
P	6154	156.076	4.16388	H10N7OP	155.068					0	0	0	0	1804	103929	102823	0	0	0	0	0	121284	204328	0	0	0	190447	171262	0	0	0	0	0	0	0	145872	0	0	0	167905	167018	174811	0	0	0	84055.7	0	0	0
P	4658	156.076	3.58009	C6H9N3O2	155.069	-1.86835				6884.8	0	0	0	0	0	102823	0	0	0	0	107922	119800	204328	191642	0	0	0	171262	170939	160687	0	0	0	0	0	0	0	0	0	0	371944	366762	0	0	0	342016	0	0	0
P	2559	156.078	3.20802	C4H14NO3P	155.07					0	0	0	0	0	0	0	0	0	0	231082	0	0	0	374261	0	0	0	0	366506	374951	0	378080	0	0	0	0	375016	0	370504	0	0	0	372907	0	0	0	0	0	516636
P	2501	156.079	3.20475	C4H14NO3P	155.072		Norzooanemonin; Me ester	C7H11N2O2	Isol. from various sponges incl. Axinyssa sp., Axinella sp., Echinodictyum sp. and Niphates sp.	0	0	0	0	0	0	0	0	247216	0	0	0	0	0	0	392978	0	0	0	0	0	395017	0	380208	380810	378934	0	0	0	0	0	0	0	0	0	365003	0	0	540935	0
P	613	156.081	2.33732	C3H15N3P2	155.074		Norzooanemonin; Me ester	C7H11N2O2	Isol. from various sponges incl. Axinyssa sp., Axinella sp., Echinodictyum sp. and Niphates sp.	0	0	159751	0	0	0	0	0	0	0	0	0	0	0	0	0	0	0	0	0	0	0	0	0	0	0	0	0	0	0	0	0	0	0	0	0	0	0	0	0
P	3069	156.082	3.20497	C3H15N3P2	155.074					0	0	0	0	0	0	0	0	0	0	0	0	0	0	0	0	376418	0	0	0	0	0	0	0	0	0	0	0	372914	0	0	0	0	0	358435	0	0	544154	0	0
P	2656	156.083	3.20757	H9N7O3	155.076					0	0	0	0	0	0	0	0	0	0	0	0	0	362486	0	0	0	378181	364125	0	0	0	0	0	0	0	356765	0	0	0	361430	0	0	0	0	0	0	0	0	0
P	6147	156.084	4.20677	H9N7O3	155.076					0	0	0	0	7424.58	105539	132347	0	0	0	0	0	130160	223859	0	0	0	191023	175810	0	0	0	0	0	0	0	147671	0	0	0	176310	161268	167855	0	0	0	106577	0	0	0
P	2812	156.085	3.64565	C8H13NS	155.078					3966.56	0	0	0	0	0	132347	3778.71	0	0	114904	109068	0	0	328115	0	0	0	175810	365010	350716	0	0	0	0	0	0	0	0	0	0	363077	358194	2256.75	0	0	328652	0	0	0
P	3362	156.086	3.19641	C4H13NO5	155.079					0	0	0	0	0	0	0	0	0	0	0	0	0	0	0	0	0	0	0	0	0	331375	336685	0	0	318188	0	325437	0	327303	0	0	0	335590	0	306405	0	0	0	479183
P	2978	156.088	3.21473	C5H9N5O	155.08					0	0	0	0	0	0	0	0	0	0	0	0	0	0	0	322939	0	0	0	0	0	0	0	301105	309835	0	0	0	0	0	0	0	0	0	0	0	0	0	462752	0
P	630	156.089	2.33732	C3H14N3O2P	155.082	-0.128368				0	0	122408	0	0	0	0	0	0	0	0	0	0	0	0	0	0	0	0	0	0	0	0	0	0	0	0	0	0	0	0	0	0	0	0	0	0	0	0	0
P	3103	156.09	3.20497	C3H14N3O2P	155.082	1.7848				0	0	0	0	0	0	0	0	0	0	0	0	0	0	0	0	286431	0	0	0	0	0	0	0	0	0	0	0	290739	0	0	0	0	0	260249	0	0	424600	0	0
P	2717	156.091	3.21312	C2H13N5OS	155.084					0	0	0	0	0	0	0	0	0	0	0	0	0	257799	0	0	0	273117	256354	0	0	0	0	0	0	0	0	0	0	0	0	0	0	0	0	0	0	0	0	0
P	6185	156.091	4.2032	C2H13N5OS	155.084					0	0	0	0	6477.6	77573.5	65284.3	0	0	0	0	0	93607.8	161577	0	0	0	150413	124118	0	0	0	0	0	0	0	79934.1	0	0	0	139869	110736	114975	0	0	0	62307.6	0	0	0
P	5953	156.093	3.21295	C8H14NP	155.086					0	0	0	0	0	0	0	0	0	0	0	0	0	0	0	0	0	0	0	0	0	0	0	0	0	0	0	0	0	0	0	0	0	0	0	0	0	0	0	313050
P	5645	156.096	3.21352		155.088					0	0	0	0	0	0	0	0	0	0	0	0	0	0	0	0	0	0	0	0	0	0	0	0	0	0	0	0	0	0	0	0	0	0	0	0	0	0	291134	0
P	5372	156.097	3.2049	C3H13N3O4	155.09					0	0	0	0	0	0	0	0	0	0	0	0	0	0	0	0	0	0	0	0	0	0	0	0	0	0	0	0	0	0	0	0	0	0	0	0	0	259982	0	0
P	6262	156.099	4.18652	C4H9N7	155.092					0	0	0	0	2616.5	44518.2	40250.5	0	0	0	0	0	55854.1	85379.5	0	0	0	69582.9	78140.4	0	0	0	0	0	0	0	53916	0	0	0	81484.2	68027.4	68219.2	0	0	0	22578.6	0	0	0
P	5463	157.986	0.253117	H3N3O5S	156.979					0	0	0	0	0	0	0	0	0	0	0	0	0	0	0	0	0	0	0	0	0	0	0	0	0	0	0	0	0	0	0	0	0	0	0	0	0	0	161104	0
P	3215	157.991	0.343768	C5H5NOP2	156.984					0	0	0	0	0	0	44945.6	0	0	0	0	41432.2	0	0	48350.5	0	0	0	42733.8	205467	55314.5	0	0	0	0	0	0	0	0	0	45609.3	180220	58225.5	0	0	0	65056.6	0	0	0
P	2582	157.991	0.730862	C5H5NOP2	156.984					0	0	0	0	0	0	44945.6	7423.58	0	0	0	65111.2	0	0	48350.5	0	0	0	4946.02	7908.11	55314.5	0	0	0	0	0	0	0	0	0	45609.3	180220	58225.5	0	0	0	65056.6	0	0	0
P	2539	157.992	0.235867	C5H5NOP2	156.985					0	0	0	0	0	0	0	0	0	0	157916	0	0	0	0	0	0	0	0	0	0	0	0	0	0	0	0	0	0	0	0	200711	0	0	0	0	0	0	0	0
P	5411	157.995	0.253117	C2H7NO3S2	156.987					0	0	0	0	0	0	0	0	0	0	0	0	0	0	0	0	0	0	0	0	0	0	0	0	0	0	0	0	0	0	0	0	0	0	0	0	0	0	239760	0
P	2570	158	0.782257	C5H4NO3P	156.992					0	0	0	0	0	0	57948.7	9944.24	0	0	2931.5	87917.7	0	0	58256	0	0	0	0	6715.54	62513.7	0	0	0	0	0	0	0	0	0	62423.1	203712	61745.3	0	0	0	66184	0	0	0
P	3213	158	0.494575	C5H4NO3P	156.992					0	0	0	0	0	0	57948.7	9944.24	0	0	184539	46564	0	0	58256	0	0	0	0	230866	69090.6	0	48685.1	0	0	0	0	0	0	0	58286.6	203712	61745.3	0	0	0	66184	0	0	3098.4
P	2538	158	0.591048	C5H4NO3P	156.993					0	0	0	0	0	0	0	6820.31	0	70744.8	217053	46564	0	0	58256	0	0	0	0	6715.54	62513.7	0	48685.1	0	0	0	0	0	0	0	0	228592	61745.3	67220.7	0	0	3080.25	0	0	36251.7
P	5405	158.003	0.253117	C4H3N3O2S	156.995					0	0	0	0	0	0	0	0	0	0	0	0	0	0	0	0	0	0	0	0	0	0	0	0	0	0	0	0	0	0	0	0	0	0	0	0	0	0	249453	0
P	3217	158.007	0.343768	CH9N3P2S	157					0	0	0	0	0	0	47611.3	0	0	0	0	37497.8	0	0	40654	0	0	0	59159.6	186130	53789.9	0	0	0	0	0	0	0	0	0	49048.9	144972	47969.6	0	0	0	55328.5	0	0	0
P	2540	158.008	0.235867	C5H3NO5	157.001					0	0	0	0	0	0	0	0	0	0	155181	0	0	0	0	0	0	0	0	0	0	0	0	0	0	0	0	0	0	0	0	155444	0	0	0	0	0	0	0	0
P	5430	158.011	0.253117	C4H4N3O2P	157.003					0	0	0	0	0	0	0	0	0	0	0	0	0	0	0	0	0	0	0	0	0	0	0	0	0	0	0	0	0	0	0	0	0	0	0	0	0	0	170194	0
P	3221	158.015	0.343768	C9H4NP	157.008					0	0	0	0	0	0	30029.2	0	0	0	0	21967.8	0	0	24477.3	0	0	0	28755.4	115371	34807.3	0	0	0	0	0	0	0	0	0	31880.2	96966.2	29454.2	0	0	0	36270.7	0	0	0
P	4627	158.016	0.67995	CH10N3P3	157.009					0	0	0	0	0	0	0	7061.11	0	30992.1	81939.3	21967.8	0	0	24477.3	0	0	0	0	4717.83	34807.3	0	25769.3	0	0	0	0	0	0	0	0	109230	29454.2	0	0	0	36270.7	0	0	17172.8
P	5614	158.027	0.253117	C6H7NO2S	157.019					0	0	0	0	0	0	0	0	0	0	0	0	0	0	0	0	0	0	0	0	0	0	0	0	0	0	0	0	0	0	0	0	0	0	0	0	0	0	74968.8	0
P	2200	158.137	11.2545		157.13					0	0	0	0	0	0	0	323329	0	0	0	0	0	0	0	0	0	0	0	0	0	297410	0	0	337207	0	0	0	0	0	0	0	0	0	0	0	0	0	0	0
P	2979	158.139	11.263	C6H15N5	157.132		2,6-Dimethylheptanoic acid; (R)-form, Amide	C9H19NO		0	0	0	0	0	0	0	0	0	0	0	0	0	0	0	337438	0	0	0	0	0	0	0	367651	0	0	0	0	0	0	0	0	0	0	298791	0	0	256941	0	0
P	458	158.141	11.2468	C6H15N5	157.133		1-Heptylamine; N-Ac	C9H19NO		0	321955	312022	341593	350074	0	0	0	0	0	0	0	0	0	0	0	397763	0	0	0	0	0	0	0	0	0	369735	0	348475	0	0	386324	304076	0	0	0	0	0	0	0
P	1206	158.142	11.0338		157.135		2-(2-Hydroxybutyl)piperidine; (2ξ,2'ξ)-form	C9H19NO	Alkaloid from leaves of Sedum brissemoreti and Sedum fusiforme	0	0	0	0	5551.66	354566	0	0	0	0	0	0	360776	362696	0	0	0	367540	356665	0	0	0	0	0	0	0	0	0	0	0	419772	0	0	151616	0	0	293091	0	0	0
P	2041	158.144	11.2538		157.137		2-(2-Hydroxybutyl)piperidine; (2R,2'R)-form	C9H19NO		0	0	0	0	0	0	0	372662	0	360978	0	0	0	0	345765	0	0	0	0	0	388407	0	435075	0	0	400283	0	0	0	455265	0	0	0	0	0	266761	0	0	0	339759
P	2421	158.146	11.256		157.139		2-(2-Hydroxybutyl)piperidine; (2S,2'R)-form	C9H19NO	Alkaloid from Andrachne aspera	0	0	0	0	0	0	0	0	381845	0	0	0	0	0	0	0	0	0	0	0	0	379083	0	0	390360	0	0	0	0	0	0	0	0	0	0	0	0	0	333265	0
P	2930	158.147	11.263		157.14		4-Hydroxy-2-methyl-6-propylpiperidine; (2R,4S,6S)-form	C9H19NO	Trace alkaloid from Picea pungens	0	0	0	0	0	0	0	0	0	0	0	0	0	0	0	459760	0	0	0	0	0	0	0	444091	0	0	0	0	0	0	0	0	0	0	363351	0	0	299859	0	0
P	375	158.149	11.2453		157.141		2-(2-Hydroxypropyl)-6-methylpiperidine; (2R,2'R,6R)-form	C9H19NO	Alkaloid from Picea engelmannii and its root parasite Pedicularis bracteosa. Also found in Picea abies, Picea pungens and Picea sitchensis	0	378897	502408	421749	420828	0	0	0	0	0	0	0	0	0	0	0	358157	0	0	0	0	0	0	0	0	0	421954	0	444837	0	549244	397707	385703	0	0	0	0	0	0	0
P	2034	158.152	11.2538		157.145		6-Methyloctanoic acid; (S)-form, Amide	C9H19NO		0	0	0	0	0	0	0	281542	0	366561	0	0	0	0	371829	0	0	0	0	0	362904	0	317628	0	0	379522	0	0	0	406540	0	0	0	0	0	279164	0	0	0	409033
P	2415	158.154	11.256	C9H19NO	157.147	-0.403074	Sedridine; (2R,2'S)-form, N-Me	C9H19NO	Alkaloid from Sedum sarmentosum (Crassulaceae)	0	0	0	0	0	0	0	0	375101	0	0	0	0	0	0	0	0	0	0	0	0	267150	0	0	299153	0	0	0	0	0	0	0	0	0	0	0	0	0	353572	0
P	2948	158.155	11.263		157.148					0	0	0	0	0	0	0	0	0	0	0	0	0	0	0	360420	0	0	0	0	0	0	0	245719	0	0	0	0	0	0	0	0	0	0	274285	0	0	413322	0	0
P	441	158.157	11.2478		157.149		Dimethyl tetrasulfide	C2H6S4	Constit. of various Allium spp., Lentinus sp. and Sauromatum sp. Prod. by marine-derived Phaeobacter gallaciensis DSM 17395	0	242193	312243	285936	285662	0	0	0	0	0	0	0	0	0	0	0	299286	0	0	0	0	0	0	0	0	0	328632	0	334659	0	297374	326454	231185	0	0	0	0	0	0	0
P	1205	158.158	11.2553		157.151					9994.32	0	0	0	5819.29	268337	0	0	0	0	0	137344	259234	246195	0	0	0	270362	221554	0	0	0	0	0	0	0	0	0	0	0	148120	0	0	133116	0	0	258792	0	0	0
P	2129	158.161	11.2529		157.154					0	0	0	0	0	0	0	182964	194810	187614	0	0	0	0	134882	0	0	0	0	0	0	134707	170407	0	169929	187834	0	0	0	0	0	0	0	0	0	213672	0	0	0	0
P	5599	158.162	11.2615		157.155					0	0	0	0	0	0	0	0	0	0	0	0	0	0	0	0	0	0	0	0	0	0	0	0	0	0	0	0	0	0	0	0	0	0	0	0	0	0	226109	0
P	792	158.164	11.2563		157.156					0	0	0	167033	0	0	0	0	0	0	0	0	0	0	0	165820	0	0	0	0	0	0	0	0	0	0	0	0	121630	0	0	143101	0	0	233621	0	0	272401	0	0
P	6471	158.166	11.2694	C8H19N3	157.158					0	0	0	0	0	0	0	0	0	0	0	0	0	0	0	0	0	0	0	0	0	0	0	0	0	0	0	0	0	0	0	0	0	0	0	0	0	0	0	0
P	6584	158.942	18.5699	CH2O5S2	157.934					0	0	0	0	0	0	0	0	0	0	0	0	0	0	0	0	0	0	0	0	0	0	0	0	0	0	0	0	0	0	0	0	0	0	0	0	0	0	0	0
P	637	158.942	0.269461	CH2O5S2	157.934					0	0	165410	114734	154778	0	0	0	0	0	0	0	0	0	0	0	106828	0	0	0	0	0	0	0	0	0	0	0	0	0	0	0	0	0	122307	0	0	99355.7	0	0
P	465	158.943	0.286133	CH4O3P2S	157.936	2.30787				0	114888	0	0	0	0	0	0	0	0	0	0	0	0	0	0	0	0	0	0	0	0	0	0	0	0	0	0	0	0	0	0	0	0	0	0	0	0	0	0
P	1149	158.943	0.269552	CH4O3P2S	157.936					0	0	0	0	0	144649	0	0	0	0	0	0	0	211387	0	0	0	124861	148060	0	0	0	0	0	0	0	147016	0	126774	0	0	0	0	0	0	0	0	0	0	0
P	1571	158.945	0.491783	H3N2O2PS2	157.937					0	0	0	0	0	0	177251	0	0	0	0	79745.2	11487.9	139059	235232	0	0	0	132804	16852.8	7421.25	0	0	0	0	0	136701	0	0	0	152534	91222.9	4477.97	0	0	0	163360	0	0	0
P	2571	158.945	0.606821	H5N2P3S	157.938					0	0	0	0	0	0	151790	9539.53	0	0	64393.6	125301	0	0	209037	0	0	0	0	16852.8	7421.25	0	15513.8	0	0	0	0	0	0	0	0	115579	173642	0	0	0	147687	0	0	73684.4
P	1622	158.946	18.5988	H5N2P3S	157.938					0	0	0	0	0	0	1.32667e+06	0	0	1.00977e+06	979732	0	0	0	0	0	0	0	0	732684	820489	0	0	0	0	1.30914e+06	0	0	0	0	0	0	0	0	0	1.05222e+06	0	0	0	841773
P	2556	158.946	0.302683	H5N2P3S	157.939					0	0	0	0	0	0	0	0	0	0	149020	0	0	0	0	0	0	0	0	0	0	0	0	0	0	0	0	0	0	0	0	0	0	0	0	0	0	0	0	0
P	1936	158.946	0.269325	H5N2P3S	157.939					0	0	0	0	0	0	0	216510	0	228374	0	0	0	0	0	0	0	0	0	0	0	0	0	0	0	0	0	0	0	0	0	0	196683	223034	0	0	0	0	0	0
P	2005	158.947	18.6166		157.94					0	0	0	0	0	0	0	1.30894e+06	1.09083e+06	0	0	0	0	0	1.16189e+06	0	0	0	0	0	0	1.05358e+06	813125	0	1.09864e+06	0	0	0	0	0	0	1.31624e+06	0	0	0	0	0	0	984177	0
P	3896	158.948	18.5764	C5H3PS2	157.941					0	0	0	0	0	0	0	0	0	0	0	0	0	0	0	0	0	0	0	0	0	0	0	0	0	0	1.74454e+06	0	1.37502e+06	0	0	0	1.30502e+06	0	1.38279e+06	0	0	1.36579e+06	0	0
P	592	158.95	0.269461		157.942					0	0	392465	324339	338489	0	0	0	0	0	0	0	0	0	0	0	318852	0	0	0	0	0	0	0	0	0	0	0	0	0	0	0	0	0	314842	0	0	279828	0	0
P	340	158.95	18.5748	C3N2O2P2	157.943					0	1.41266e+06	1.97444e+06	0	0	0	0	0	0	0	0	0	0	0	0	1.50187e+06	1.53733e+06	0	0	0	0	0	0	0	0	0	0	0	0	0	1.38293e+06	0	0	0	0	0	0	0	0	0
P	233	158.951	0.286133	C3N2O2P2	157.944					0	268497	0	0	0	0	0	0	0	0	0	0	0	0	0	0	0	0	0	0	0	0	0	0	0	0	0	0	0	0	0	0	0	0	0	0	0	0	0	0
P	985	158.951	0.269552	CH3O5PS	157.944					0	0	0	0	0	357898	0	0	0	0	0	0	0	372251	0	0	0	414676	373029	0	0	0	0	0	0	0	360955	0	342049	0	0	0	0	0	0	0	0	0	0	0
P	1446	158.953	0.480664	H2N2O4S2	157.945					0	0	0	0	0	0	389889	0	0	0	0	164915	25977.3	339146	433448	0	0	0	341938	24080.4	25794.5	0	0	0	0	0	339235	0	0	0	369973	184396	4846.66	0	0	0	372344	0	0	0
P	2565	158.953	0.625235	H2N2O4S2	157.946					0	0	0	0	0	0	352076	6711.2	0	0	0	230703	0	0	403088	0	0	0	341938	24080.4	25794.5	0	0	0	0	0	0	0	0	0	345291	184396	367124	0	0	0	347487	0	0	0
P	1512	158.954	18.605	H4N2O2P2S	157.946					0	0	0	0	0	0	2.24116e+06	0	0	1.63577e+06	1.73959e+06	0	0	0	0	0	0	0	0	1.64561e+06	1.73801e+06	0	0	0	0	2.30083e+06	0	0	0	0	0	0	0	0	0	1.56991e+06	0	0	0	1.3329e+06
P	2546	158.954	0.285806	H4N2O2P2S	157.947		(Chloroacetyl)phosphonic acid	C2H4ClO4P	Prod. by Talaromyces flavus and Fusarium spp.	0	0	0	0	0	0	0	0	0	0	171960	0	0	0	0	0	0	0	0	0	0	0	0	0	0	0	0	0	0	0	0	232036	0	0	0	0	0	0	0	306820
P	1856	158.954	0.269325	H4N2O2P2S	157.947		(Chloroacetyl)phosphonic acid	C2H4ClO4P	Prod. by Talaromyces flavus and Fusarium spp.	0	0	0	0	0	0	0	422430	0	431863	0	0	0	0	0	0	0	0	0	0	0	0	0	0	0	0	0	0	0	0	0	0	397462	412076	0	0	0	0	0	0
P	1925	158.955	18.6208	C8P2	157.948					0	0	0	0	0	0	0	2.01877e+06	2.1802e+06	0	0	0	0	0	1.75199e+06	0	0	0	0	0	0	1.7099e+06	1.6397e+06	0	1.4028e+06	0	0	0	0	0	0	0	0	0	0	0	0	0	1.46624e+06	0
P	3857	158.956	18.5764	C5H2O2S2	157.949					0	0	0	0	0	0	0	0	0	0	0	0	0	0	0	0	0	0	0	0	0	0	0	0	0	0	2.35373e+06	0	1.98609e+06	0	0	0	2.03995e+06	0	1.89677e+06	0	0	1.66603e+06	0	0
P	581	158.958	0.269461	C5H4P2S	157.95					0	0	500920	491401	478283	0	0	0	0	0	0	0	0	0	0	0	473735	0	0	0	0	0	0	0	0	0	0	0	0	0	0	0	0	0	446609	0	0	425682	0	0
P	313	158.958	18.5658	C5H4P2S	157.951					0	1.55894e+06	2.39225e+06	2.50481e+06	0	0	0	0	0	0	0	0	0	0	0	1.83261e+06	1.81705e+06	0	0	0	0	0	0	0	0	0	0	0	0	0	2.08732e+06	0	0	0	0	0	0	0	0	0
P	191	158.959	0.286133	CH2O7S	157.952					0	348105	0	0	0	0	0	0	0	0	0	0	0	0	0	0	0	0	0	0	0	0	0	0	0	0	0	0	0	0	0	0	0	0	0	0	0	0	0	0
P	956	158.959	0.269552	CH2O7S	157.952					0	0	0	0	0	472193	0	0	0	0	0	0	0	473588	0	0	0	461806	471210	0	0	0	0	0	0	0	450528	0	468330	0	0	0	0	0	0	0	0	0	0	0
P	1417	158.961	0.481777	CH4O5P2	157.953	-0.974631				0	0	0	0	0	0	480723	0	0	0	0	191632	32365.4	441408	454116	0	0	0	434965	32331.8	28279.2	0	0	0	0	0	428758	0	0	0	469927	198744	12836.9	0	0	0	445815	0	0	0
P	2562	158.961	0.612726	CH4O5P2	157.954	1.53355				0	0	0	0	0	0	440701	15595.2	0	0	0	241038	0	0	423959	0	0	0	434965	32331.8	28279.2	0	0	0	0	0	0	0	0	0	438929	198744	410599	0	0	0	423217	0	0	0
P	1518	158.962	18.605	C2H8P2S2	157.954					0	0	0	0	0	0	1.74814e+06	0	0	1.76599e+06	1.69607e+06	0	0	0	0	0	0	0	0	1.67193e+06	1.35973e+06	0	0	0	0	2.21867e+06	0	0	0	0	0	0	0	0	0	1.77966e+06	0	0	0	1.41062e+06
P	2545	158.962	0.285806	C2N4OP2	157.955					0	0	0	0	0	0	0	0	0	0	330944	0	0	0	0	0	0	0	0	0	0	0	0	0	0	0	0	0	0	0	0	244276	0	0	0	0	0	0	0	338203
P	1847	158.962	0.269325	H3N2O4PS	157.955					0	0	0	0	0	0	0	475103	0	460274	0	0	0	0	0	0	0	0	0	0	0	0	0	0	0	0	0	0	0	0	0	0	441274	429091	0	0	0	0	0	0
P	1956	158.963	18.6221	H5N2O2P3	157.956					0	0	0	0	0	0	0	1.76644e+06	1.66688e+06	0	0	0	0	0	1.50782e+06	0	0	0	0	0	0	1.3322e+06	1.28415e+06	0	1.36194e+06	0	0	0	0	0	0	1.58008e+06	0	0	0	0	0	0	1.44021e+06	0
P	2932	158.965	18.5903		157.958					0	0	0	0	0	0	0	0	0	0	0	0	0	0	0	1.41855e+06	0	0	0	0	0	0	0	0	0	0	1.98736e+06	0	1.92411e+06	0	0	0	1.64691e+06	0	1.52917e+06	0	0	1.59167e+06	0	0
P	585	158.966	0.269461	C5H3O2PS	157.959					0	0	490763	420546	398440	0	0	0	0	0	0	0	0	0	0	0	471250	0	0	0	0	0	0	0	0	0	0	0	0	0	0	0	0	0	370386	0	0	393274	0	0
P	215	158.967	0.286133	C5H3O2PS	157.96					0	283895	0	0	0	0	0	0	0	0	0	0	0	0	0	0	0	0	0	0	0	0	0	0	0	0	0	0	0	0	0	0	0	0	0	0	0	0	0	0
P	975	158.968	0.269552	C5H5P3	157.96					0	0	0	0	0	368761	0	0	0	0	0	0	0	369020	0	0	0	446863	363350	0	0	0	0	0	0	0	346321	0	388933	0	0	0	0	0	0	0	0	0	0	0
P	1447	158.969	0.481777	CH3O7P	157.961					0	0	0	0	0	0	357440	0	0	0	0	140996	27410.6	353787	301529	0	0	0	339783	20903.3	21887.1	0	0	0	0	0	321710	0	0	0	354336	140204	10985.1	0	0	0	336542	0	0	0
P	2566	158.969	0.623846	CH3O7P	157.962					0	0	0	0	0	0	331214	4338.33	0	0	0	175566	0	0	285693	0	0	0	339783	20903.3	21887.1	0	0	0	0	0	0	0	0	0	329129	140204	291728	0	0	0	319551	0	0	0
P	1603	158.97	18.6009	C2H7O2PS2	157.962					0	0	0	0	0	0	1.42902e+06	0	0	1.02592e+06	1.11109e+06	0	0	0	0	0	0	0	0	967697	823459	0	0	0	0	1.43861e+06	0	0	0	0	0	0	0	0	0	1.18976e+06	0	0	0	1.05198e+06
P	2548	158.97	0.285806	C2H7O2PS2	157.963					0	0	0	0	0	0	0	0	0	0	128408	0	0	0	0	0	0	0	0	0	0	0	0	0	0	0	0	0	0	0	0	167172	0	0	0	0	0	0	0	248417
P	1877	158.97	0.269325	H2N2O6S	157.963					0	0	0	0	0	0	0	332285	0	322142	0	0	0	0	0	0	0	0	0	0	0	0	0	0	0	0	0	0	0	0	0	0	312669	285817	0	0	0	0	0	0
P	2062	158.971	18.6184	C2H9P3S	157.964					0	0	0	0	0	0	0	1.08874e+06	1.15007e+06	0	0	0	0	0	901960	0	0	0	0	0	0	955138	1.0278e+06	0	766318	0	0	0	0	0	0	1.14997e+06	0	0	0	0	0	0	1.06951e+06	0
P	3939	158.972	18.5831	H4N2O4P2	157.965					0	0	0	0	0	0	0	0	0	0	0	0	0	0	0	0	0	0	0	0	0	0	0	0	0	0	1.37455e+06	0	1.0766e+06	0	0	0	901071	0	856453	0	0	1.05399e+06	0	0
P	595	158.974	0.269461	CN6P2	157.967					0	0	270903	257553	239422	0	0	0	0	0	0	0	0	0	0	0	260972	0	0	0	0	0	0	0	0	0	0	0	0	0	0	0	0	0	234357	0	0	252270	0	0
P	626	158.974	18.5645	CN6P2	157.967					0	0	1.03727e+06	953412	0	0	0	0	0	0	0	0	0	0	0	747337	0	0	0	0	0	0	0	0	0	0	0	0	0	0	1.0329e+06	0	0	0	0	0	0	0	0	0
P	294	158.975	0.286133	C5H2O4S	157.968					0	167505	0	0	0	0	0	0	0	0	0	0	0	0	0	0	0	0	0	0	0	0	0	0	0	0	0	0	0	0	0	0	0	0	0	0	0	0	0	0
P	1035	158.976	0.269552	C5H4O2P2	157.968					0	0	0	0	0	222941	0	0	0	0	0	0	0	219332	0	0	0	259608	218294	0	0	0	0	0	0	0	229342	0	239802	0	0	0	0	0	0	0	0	0	0	0
P	1509	158.977	0.479552	CH2O9	157.969					0	0	0	0	0	0	209659	0	0	0	0	81012.7	15003.1	211997	163502	0	0	0	202966	11910.5	12571.1	0	0	0	0	0	210640	0	0	0	218558	87297.5	5063.86	0	0	0	204045	0	0	0
P	2569	158.978	0.583727	C4H3N2OPS	157.97					0	0	0	0	0	0	197206	9003.36	0	0	55342.7	87408.4	0	0	166727	0	0	0	0	11910.5	12571.1	0	13075.2	0	0	0	0	0	0	0	0	103522	167895	0	0	0	192195	0	0	70258.1
P	1741	158.978	18.5591	C4H3N2OPS	157.97					0	0	0	0	0	0	761857	0	0	0	0	0	0	0	0	0	0	0	0	0	0	0	0	0	0	1.22068e+06	0	0	0	0	0	0	0	0	0	0	0	0	0	0
P	1935	158.978	0.269344	C2H6O4S2	157.971					0	0	0	0	0	0	0	186440	0	178645	0	0	0	0	0	0	0	0	0	0	0	0	0	0	0	0	0	0	0	0	0	0	175295	0	0	0	0	0	0	0
P	6726	158.979	18.6	C2H8O2P2S	157.972					0	0	0	0	0	0	0	0	0	0	0	0	0	0	0	0	0	0	0	0	0	0	0	0	0	0	0	0	0	0	0	0	0	0	0	0	0	0	0	0
P	4028	158.981	18.5329	C2H10P4	157.973					0	0	0	0	0	0	0	0	0	0	0	0	0	0	0	0	0	0	0	0	0	0	0	0	0	0	820824	0	757001	0	0	0	0	0	0	0	0	0	0	0
P	609	158.982	0.26945	CH7N2OPS2	157.975					0	0	195000	152361	146575	0	0	0	0	0	0	0	0	0	0	0	0	0	0	0	0	0	0	0	0	0	0	0	0	0	0	0	0	0	132540	0	0	147443	0	0
P	681	158.982	18.5247	H6N4S3	157.975					0	0	564589	589635	0	0	0	0	0	0	0	0	0	0	0	0	0	0	0	0	0	0	0	0	0	0	0	0	0	0	0	0	0	0	0	0	0	0	0	0
P	418	158.983	0.286133	H6N4S3	157.976					0	91937.8	0	0	0	0	0	0	0	0	0	0	0	0	0	0	0	0	0	0	0	0	0	0	0	0	0	0	0	0	0	0	0	0	0	0	0	0	0	0
P	1139	158.984	0.269478	C5H3O4P	157.976					0	0	0	0	0	135967	0	0	0	0	0	0	0	130734	0	0	0	0	0	0	0	0	0	0	0	0	144003	0	147410	0	0	0	0	0	0	0	0	0	0	0
P	1621	158.985	0.495745	C5H3O4P	157.977					0	0	0	0	0	0	122374	0	0	0	0	44536.3	8496	123342	96834.9	0	0	0	115705	6536.84	5867.64	0	0	0	0	0	131716	0	0	0	129221	5946.44	0	0	0	0	110318	0	0	0
P	2050	158.986	0.268983	C4H2N2O3S	157.979					0	0	0	0	0	0	0	108953	0	0	0	0	0	0	0	0	0	0	0	0	0	0	0	0	0	0	0	0	0	0	0	0	0	0	0	0	0	0	0	0
P	857	158.99	0.26957	C9H2OS	157.983					0	0	0	0	71105.3	0	0	0	0	0	0	0	0	0	0	0	77729.8	69173.5	0	0	0	0	0	0	0	0	0	0	0	0	0	0	0	0	0	0	0	102795	0	0
P	4066	158.992	0.273621	H7N4PS2	157.985					0	53288.4	0	0	0	64573.2	59012.2	0	0	0	0	0	5935	69836.1	0	0	0	69910.4	57809.8	0	0	0	0	0	0	0	85957.9	0	65433.2	0	57692	0	0	0	0	0	61150	0	0	0
P	6423	160.053	3.77704	C6H10NO2P	159.046					0	7655.48	0	0	10259.5	7924.23	0	0	0	0	0	0	10972.9	10489.1	0	0	0	6465.74	2731.97	0	0	0	0	0	0	0	5806.19	0	29910.8	0	31630.9	0	0	0	0	0	1081.13	0	0	0
P	3674	160.057	2.34879	CH9N3O6	159.049					0	0	0	0	0	0	0	0	0	0	0	0	0	0	0	0	0	0	0	0	0	0	0	0	0	75013.5	0	62919.1	0	109714	0	0	0	79178.2	0	0	0	0	115629	0
P	4842	160.059	2.35437	H10N5O3P	159.052					0	0	0	0	0	0	0	0	0	0	0	0	0	0	0	0	0	0	0	0	0	0	0	0	0	0	0	0	0	0	0	0	0	0	89427.9	0	0	137407	0	0
P	3913	160.061	2.33345	C6H9NO4	159.054					0	0	0	0	0	0	0	0	0	0	0	0	0	0	0	0	0	0	0	0	0	0	0	0	0	0	132296	0	182247	0	148909	0	0	0	0	0	0	0	0	0
P	4617	160.062	2.41184	C7H5N5	159.055		Hexahydro-3-imino-1,2,4-oxadiazepine-3-carboxylic acid; (S)-form	C5H9N3O3	May occur with Canavanine in Jack bean meal (Canavalia ensiformis) and other plants	0	0	0	0	0	0	5662.53	0	0	0	0	3831.45	0	0	4834.01	0	0	0	6328.38	6071.41	7732.86	0	0	0	0	0	0	0	0	0	118754	161171	131358	0	0	0	111951	0	0	0
P	3556	160.064	2.3486	C5H10N3OP	159.057					0	0	0	0	0	0	0	0	0	0	0	0	0	0	0	0	0	0	0	0	0	0	0	0	0	180579	0	281560	0	178685	0	0	0	130218	0	126827	0	0	0	254312
P	5404	160.065	2.35454	C4H9N5S	159.058					0	0	0	0	0	0	0	0	0	0	0	0	0	0	0	0	0	0	0	0	0	0	0	0	0	0	0	0	0	0	0	0	0	0	0	0	0	0	270848	0
P	3430	160.066	10.2251		159.059					0	0	0	0	0	0	0	0	0	0	0	0	0	0	0	0	0	0	0	0	0	0	0	76070.7	0	0	0	0	0	0	0	0	0	0	0	0	0	0	0	0
P	4814	160.067	2.35437	H9N5O5	159.06					0	0	0	0	0	0	0	0	0	0	0	0	0	0	0	0	0	0	0	0	0	0	0	0	0	0	0	0	0	0	0	0	0	0	156963	0	0	291419	0	0
P	3859	160.069	2.33345	CH5N9O	159.062					0	0	0	0	0	0	0	0	0	0	0	0	0	0	0	0	0	0	0	0	0	0	0	0	0	0	295868	0	195798	0	266489	0	0	0	0	0	0	0	0	0
P	2729	160.069	10.0401	CH5N9O	159.062		3-Acetylindole	C10H9NO	Constit. of Strychnos cathayensis	0	0	0	0	8010.73	55275.7	0	0	0	0	0	0	51585.4	69959.3	0	0	0	85484.7	73957.8	0	0	0	0	0	0	0	0	0	0	0	43809.2	0	25712.4	4978.53	0	0	45322.3	0	0	0
P	4606	160.07	2.37545		159.063		3-Ethylidene-1,3-dihydro-2H-indol-2-one; (Z)-form	C10H9NO	Prod. by Colletotrichum fragariae and Colletotrichum gloeosporioides	0	0	0	0	0	0	1734.73	0	0	0	0	4563.2	0	0	6912.53	0	0	0	5198.69	4432.5	4647.27	0	0	0	0	0	0	0	0	0	183569	216579	166569	0	0	0	166253	0	0	0
P	3307	160.071	10.2252	C5H9N3O3	159.064	-1.52271	4-Hydroxy-2-methylquinoline	C10H9NO		0	0	0	0	0	0	0	0	0	0	0	0	0	0	0	0	0	0	0	0	75206.3	0	0	0	0	0	0	0	0	0	0	0	0	0	0	0	0	0	0	0
P	3543	160.072	2.3486	C5H9N3O3	159.065		3-(3-Hydroxyphenyl)-2-propenoic acid; (Z)-form, Me ether, nitrile	C10H9NO		0	0	0	0	0	0	0	0	0	0	0	0	0	0	0	0	0	0	0	0	0	0	0	0	0	268063	0	190300	0	212024	0	0	0	167881	0	157198	0	0	0	338224
P	3382	160.073	10.209	C5H9N3O3	159.065		3-(4-Hydroxyphenyl)-2-propenoic acid; (E)-form, Me ether, nitrile	C10H9NO		0	0	0	0	0	0	0	0	0	0	0	0	0	0	0	0	0	0	0	0	0	84756.8	75701.2	0	0	0	0	0	0	0	0	0	0	0	0	0	0	0	0	0
P	5398	160.073	2.35454		159.066		1H-Indole-3-acetaldehyde	C10H9NO	Isol. from various plants incl. Brassica spp.	0	0	0	0	0	0	0	0	0	0	0	0	0	0	0	0	0	0	0	0	0	0	0	0	0	0	0	0	0	0	0	0	0	0	0	0	0	0	327192	0
P	3014	160.075	10.2265	C4H10N5P	159.068		2-Methylquinoline; N-Oxide	C10H9NO		0	0	0	0	0	0	0	0	0	0	0	0	0	0	0	60382.6	0	0	0	0	0	0	0	0	0	0	0	0	0	0	0	0	0	0	0	0	0	0	0	0
P	4813	160.075	2.35437	C10H9NO	159.068	-1.86664	1-Methyl-4(1H)-quinolinone	C10H9NO	Alkaloid from the seeds of Echinops ritro and several other Echinops spp. (Compositae)	0	0	0	0	0	0	0	0	0	0	0	0	0	0	0	0	0	0	0	0	0	0	0	0	0	0	0	0	0	0	0	0	0	0	159808	0	0	313195	0	0
							3-Oxiranyl-1H-indole	C10H9NO
P	6465	160.077	10.021		159.07		2-Amino-4-methylquinazoline	C9H9N3	Prod. by Streptomyces sp. GS DV232	0	42451.9	0	0	3417.44	53036.2	0	0	0	0	0	0	46644.9	60771.9	0	0	0	60493.4	53078.4	0	0	0	0	0	0	0	0	0	0	0	40036.3	0	43616.1	0	0	0	40851	0	0	0
P	3885	160.077	2.33345		159.07					0	0	0	0	0	0	0	0	0	0	0	0	0	0	0	0	0	0	0	0	0	0	0	0	0	0	200907	0	196528	0	208396	0	0	0	0	0	0	0	0	0
P	4616	160.078	2.33148	C7H13NOS	159.071					0	0	0	0	0	0	8472.97	0	0	0	0	2058.83	0	0	9107.24	0	0	0	6454.07	2647.22	2686.74	0	0	0	0	0	0	0	0	0	158239	136886	137347	0	0	0	138733	0	0	0
P	3588	160.08	2.3486	H5N11	159.073					0	0	0	0	0	0	0	0	0	0	0	0	0	0	0	0	0	0	0	0	0	0	0	0	0	142380	0	173076	0	160023	0	0	0	129551	0	120631	0	0	0	294399
P	5412	160.081	2.35454		159.074					0	0	0	0	0	0	0	0	0	0	0	0	0	0	0	0	0	0	0	0	0	0	0	0	0	0	0	0	0	0	0	0	0	0	0	0	0	0	268945	0
P	4830	160.083	2.35437	C4H9N5O2	159.076					0	0	0	0	0	0	0	0	0	0	0	0	0	0	0	0	0	0	0	0	0	0	0	0	0	0	0	0	0	0	0	0	0	0	108068	0	0	230708	0	0
P	3937	160.085	2.33763		159.078					0	0	0	0	0	0	0	0	0	0	0	0	0	0	0	0	0	0	0	0	0	0	0	0	0	0	163247	0	119519	0	91506.8	0	0	0	0	0	0	0	0	0
P	4642	160.087	2.33907	C9H9N3	159.079	-2.3599	2-Quinolinamine; N1-Me	C10H11N2		0	0	0	0	0	0	4097.56	0	0	0	0	4151.25	0	0	16055.6	0	0	0	10772	2898.13	12429	0	0	0	0	0	0	0	0	0	96361.8	83384.8	84183.2	0	0	0	104108	0	0	0
P	3667	160.088	2.3486	C7H14NOP	159.081					0	0	0	0	0	0	0	0	0	0	0	0	0	0	0	0	0	0	0	0	0	0	0	0	0	152079	0	78643.4	0	73950.9	0	0	0	77088	0	80205.2	0	0	0	188576
P	5441	160.089	2.35454	C6H13N3S	159.082					0	0	0	0	0	0	0	0	0	0	0	0	0	0	0	0	0	0	0	0	0	0	0	0	0	0	0	0	0	0	0	0	0	0	0	0	0	0	191177	0
P	4857	160.091	2.35437		159.084					0	0	0	0	0	0	0	0	0	0	0	0	0	0	0	0	0	0	0	0	0	0	0	0	0	0	0	0	0	0	0	0	0	0	72542.7	0	0	147454	0	0
P	4045	160.094	3.64365	C3H9N7O	159.086		2-(Methylthio)ethanol; 2-Methyl-2-propenoyl	C7H12O2S		0	0	0	0	4237.45	4798.58	1458.78	0	0	0	0	0	2029.39	11286.5	0	0	0	15322.5	11295.1	0	0	0	0	0	0	0	81153.4	0	0	0	57357.2	33090	2865.17	0	0	0	63099	0	0	0
P	5829	160.095	2.76182		159.088					5268.96	0	0	0	0	0	1458.78	5403.88	0	4158.98	3989.27	3342.56	0	0	20886.2	0	0	0	0	1720.08	16125.5	0	8419.09	0	0	0	0	0	0	0	0	49473.7	56044.3	56052.7	0	0	60528.1	0	0	110715
P	5501	160.098	2.35454	C7H13NO3	159.09					0	0	0	0	0	0	0	0	0	0	0	0	0	0	0	0	0	0	0	0	0	0	0	0	0	0	0	0	0	0	0	0	0	0	0	0	0	0	105831	0
P	5186	160.099	2.35442	C6H14N3P	159.092	-1.99552				0	0	0	0	0	0	0	0	0	0	0	0	0	0	0	0	0	0	0	0	0	0	0	0	0	0	0	0	0	0	0	0	0	0	0	0	0	78408	0	0
P	6408	160.101	2.34874	C6H14N3P	159.093					0	0	0	0	0	0	0	0	0	0	0	0	0	0	0	0	0	0	0	0	0	0	0	0	0	0	0	0	0	0	0	0	0	0	0	0	0	0	0	0
P	5366	161.059	8.92589	C4H9N4OP	160.052					0	0	0	0	0	0	0	0	0	0	0	0	0	0	0	0	0	0	0	0	0	0	0	0	0	0	0	0	0	0	0	0	0	0	0	0	0	190390	0	0
P	6449	161.061	8.9259	C3H8N6S	160.053					0	0	0	0	0	0	0	0	0	0	0	0	0	0	0	0	0	0	0	0	0	0	0	0	0	0	0	0	0	0	0	0	0	0	0	0	0	0	0	0
P	5969	161.063	8.92554	C7H12O2S	160.056	2.16522	1-Phenyl-2-penten-1-one	C11H12O	Prod. by Polyporus sp. PSU-ES44	0	0	0	0	0	0	0	0	0	0	0	0	0	0	0	0	0	0	0	0	0	0	0	0	0	0	0	0	0	0	0	0	0	0	0	0	0	0	0	264647
P	5585	161.066	8.93448		160.058					0	0	0	0	0	0	0	0	0	0	0	0	0	0	0	0	0	0	0	0	0	0	0	0	0	0	0	0	0	0	0	0	0	0	0	0	0	0	290339	0
P	5232	161.067	8.92932	C4H8N4O3	160.06					0	0	0	0	0	0	0	0	0	0	0	0	0	0	0	0	0	0	0	0	0	0	0	0	0	0	0	0	0	0	0	0	0	0	0	0	0	215475	0	0
P	6367	161.069	8.93146		160.061		2-Methyl-4-propyl-1,3-oxathiane	C8H16OS	Isol. from juice of passion fruit Passiflora edulis	0	0	0	0	0	0	0	0	0	0	0	0	0	0	0	0	0	0	0	0	0	0	0	0	0	0	0	0	0	0	0	0	0	0	0	0	0	0	0	0
P	5975	161.072	8.92554	C9H8N2O	160.064		2-Methyl-4-propyl-1,3-oxathiane; (2R,4S)-form	C8H16OS		0	0	0	0	0	0	0	0	0	0	0	0	0	0	0	0	0	0	0	0	0	0	0	0	0	0	0	0	0	0	0	0	0	0	0	0	0	0	0	260280
P	5643	161.073	8.92637	C6H12N2OS	160.066		2-Methyl-4-propyl-1,3-oxathiane; (2R,4R)-form	C8H16OS		0	0	0	0	0	0	0	0	0	0	0	0	0	0	0	0	0	0	0	0	0	0	0	0	0	0	0	0	0	0	0	0	0	0	0	0	0	0	198812	0
P	5331	161.075	8.92582	C6H12N2OS	160.067		Octanethioic acid; SH-form	C8H16OS		0	0	0	0	0	0	0	0	0	0	0	0	0	0	0	0	0	0	0	0	0	0	0	0	0	0	0	0	0	0	0	0	0	0	0	0	0	194557	0	0
P	2185	161.096	7.04123	C11H12O	160.089	1.95785				0	0	0	0	0	0	0	116085	0	0	0	0	0	0	0	0	0	0	0	0	0	0	0	0	0	0	0	0	0	0	0	0	0	0	0	0	0	0	0	0
P	2510	161.098	7.07398		160.091					0	0	0	0	0	0	0	0	147745	0	0	0	0	0	0	0	0	0	0	0	0	0	0	0	0	0	0	0	0	0	0	0	0	0	0	0	0	0	0	0
P	781	161.1	7.04115	C8H16OS	160.092	1.87619				0	0	0	109866	0	0	0	0	0	0	0	0	0	0	0	0	0	0	0	0	0	0	0	0	0	0	0	0	0	0	0	0	0	0	0	0	0	0	0	0
P	509	161.101	7.04904	CH8N10	160.094		4,5-Dihydroxyhexanal; (4S,5R)-form, α-Et pyranoside	C8H16O3		0	106628	0	0	108086	0	0	0	0	0	0	0	0	0	0	0	0	0	0	0	0	0	0	0	0	0	0	0	0	0	0	0	0	0	0	0	0	0	0	0
P	1273	161.102	7.45177	CH8N10	160.094		2,5-Hexanediol; (2S,5R)-form, 5-Ac	C8H16O3		0	87152.1	0	0	3875.39	111276	0	0	0	0	0	0	105292	10590.6	0	0	0	13599.4	12393.3	0	0	0	0	0	0	0	14891.9	0	0	0	8665.38	14662.3	5472.99	0	0	0	5342.71	0	0	0
P	2143	161.104	7.05184		160.097		3-Hydroxybutanoic acid; (±)-form, Et ether, Et ester	C8H16O3		0	0	0	0	0	0	0	111941	0	108309	116012	0	0	0	0	0	0	0	0	0	0	0	0	0	0	0	0	0	0	0	0	0	0	0	0	0	0	0	0	0
P	2489	161.106	7.0573		160.099		4-Hydroxybutanoic acid; Et ether, Et ester	C8H16O3		0	0	0	0	0	0	0	0	109781	0	0	0	0	0	0	0	0	0	0	0	0	0	0	0	0	0	0	0	0	0	0	0	0	0	0	0	0	0	0	0
P	785	161.108	7.04115	C10H12N2	160.101		4-Hydroxy-2-butenal; (Z)-form, Di-Et acetal	C8H16O3		0	0	0	103410	0	0	0	0	0	0	0	0	0	0	0	0	0	0	0	0	0	0	0	0	0	0	0	0	0	0	0	0	0	0	0	0	0	0	0	0
P	560	161.109	7.04904	C8H17OP	160.102		1-(2-Hydroxyethyl)-1,4-cyclohexanediol; (1RS,4SR)-form	C8H16O3	Constit. of Isoplexis chalcantha and Forsythia suspensa	0	93437.1	0	0	100230	0	0	0	0	0	0	0	0	0	0	0	0	0	0	0	0	0	0	0	0	0	0	0	0	0	0	0	0	0	0	0	0	0	0	0
P	1332	161.11	7.43724	C8H17OP	160.102		6-Hydroxyheptanoic acid; (R)-form, Me ester	C8H16O3		0	0	0	0	3229.01	96086.8	0	0	0	0	0	0	82599.6	9003.58	0	0	0	9447.31	6772.56	0	0	0	0	0	0	0	6630.64	0	0	0	3704.37	5124.45	2938.91	0	0	0	3072.51	0	0	0
P	6594	161.116	9.81421		160.108		3-Hydroxyhexanoic acid; (±)-form, Et ester	C8H16O3	Found in various fruits (e.g. orange, grapefruit, pineapple), presumably in an enantiomeric form	0	0	0	0	0	0	0	0	0	0	0	0	0	0	0	0	0	0	0	0	0	0	0	0	0	0	0	0	0	0	0	0	0	0	0	0	0	0	0	0
P	6323	161.117	9.81545	C8H16O3	160.11	0.104694	3-Hydroxy-3-methylhexanoic acid; (±)-form, Me ester	C8H16O3		0	0	0	0	0	0	0	0	0	0	0	0	0	0	0	0	0	0	0	0	0	0	0	0	0	0	0	0	0	0	0	0	0	0	0	0	0	0	0	0
P	5882	161.12	9.80952	C7H17N2P	160.113		Lysine; (S)-form, Me ester	C7H16N2O2		0	0	0	0	0	0	0	0	0	0	0	0	0	0	0	0	0	0	0	0	0	0	0	0	0	0	0	0	0	0	0	0	0	0	0	0	0	0	0	322897
P	5502	161.122	9.81847		160.115		2,3,4,6,7-Pentadeoxy-2,6-diamino-ribo-heptose; D-form	C7H16N2O2	Component of Gentamicin C2	0	0	0	0	0	0	0	0	0	0	0	0	0	0	0	0	0	0	0	0	0	0	0	0	0	0	0	0	0	0	0	0	0	0	0	0	0	0	282366	0
P	5135	161.124	9.81332		160.116		Putreanine	C7H16N2O2	Amino acid present in mammalian brain	0	0	0	0	0	0	0	0	0	0	0	0	0	0	0	0	0	0	0	0	0	0	0	0	0	0	0	0	0	0	0	0	0	0	0	0	0	203336	0	0
P	6227	161.125	9.81545	C3H12N8	160.118					0	0	0	0	0	0	0	0	0	0	0	0	0	0	0	0	0	0	0	0	0	0	0	0	0	0	0	0	0	0	0	0	0	0	0	0	0	0	0	0
P	4779	161.127	10.2832		160.12					10390.5	0	0	0	0	5143.82	4123.86	0	0	0	0	3912.31	0	5944.8	0	0	0	0	5145.05	7213.25	0	0	0	0	0	0	0	1905.21	0	0	0	0	0	88175.9	0	0	241597	0	0	0
P	5816	161.128	9.80952	C7H16N2O2	160.121	-2.32527	4-Nonanethiol; (ξ)-form	C9H20S	Isol. from red bell pepper, Capsicum annuum	0	0	0	0	0	0	0	0	0	0	0	0	0	0	0	0	0	0	0	0	0	0	0	0	0	0	0	0	0	0	0	0	0	0	0	0	0	0	0	187590
P	5472	161.13	9.81037		160.123					0	0	0	0	0	0	0	0	0	0	0	0	0	0	0	0	0	0	0	0	0	0	0	0	0	0	0	0	0	0	0	0	0	0	0	0	0	0	171542	0
P	5124	161.132	9.81553	C12H16	160.124		Choline; O-Propanoyl	C8H18NO2	Isol. from Viscum album	0	0	0	0	0	0	0	0	0	0	0	0	0	0	0	0	0	0	0	0	0	0	0	0	0	0	0	0	0	0	0	0	0	0	0	0	0	153480	0	0
P	6241	161.133	9.81545	C12H16	160.126					0	0	0	0	0	0	0	0	0	0	0	0	0	0	0	0	0	0	0	0	0	0	0	0	0	0	0	0	0	0	0	0	0	0	0	0	0	0	0	0
P	5850	161.136	9.80952	C9H20S	160.129	1.9208				0	0	0	0	0	0	0	0	0	0	0	0	0	0	0	0	0	0	0	0	0	0	0	0	0	0	0	0	0	0	0	0	0	0	0	0	0	0	0	131508
P	5517	161.138	9.81847		160.131					0	0	0	0	0	0	0	0	0	0	0	0	0	0	0	0	0	0	0	0	0	0	0	0	0	0	0	0	0	0	0	0	0	0	0	0	0	0	116247	0
P	5192	161.14	9.81332	C6H16N4O	160.133					0	0	0	0	0	0	0	0	0	0	0	0	0	0	0	0	0	0	0	0	0	0	0	0	0	0	0	0	0	0	0	0	0	0	0	0	0	99931.4	0	0
P	6352	161.141	9.81545		160.134	2.85088				0	0	0	0	0	0	0	0	0	0	0	0	0	0	0	0	0	0	0	0	0	0	0	0	0	0	0	0	0	0	0	0	0	0	0	0	0	0	0	0
P	6031	161.144	9.81787		160.137					0	0	0	0	0	0	0	0	0	0	0	0	0	0	0	0	0	0	0	0	0	0	0	0	0	0	0	0	0	0	0	0	0	0	0	0	0	0	0	73311.5
P	5723	161.146	9.81037	C9H21P	160.139					0	0	0	0	0	0	0	0	0	0	0	0	0	0	0	0	0	0	0	0	0	0	0	0	0	0	0	0	0	0	0	0	0	0	0	0	0	0	69183.3	0
P	5706	162.077	9.77702	C6H11NO4	161.069					0	0	0	0	0	0	0	0	0	0	0	0	0	0	0	0	0	0	0	0	0	0	0	0	0	0	0	0	0	0	0	0	0	0	0	0	0	0	121611	0
P	5277	162.078	9.78217	C5H12N3OP	161.071		Abikoviromycin	C10H11NO	Prod. by Streptomyces abikoensis, Streptomyces rubescens and Streptomyces latumcidicus	0	0	0	0	0	0	0	0	0	0	0	0	0	0	0	0	0	0	0	0	0	0	0	0	0	0	0	0	0	0	0	0	0	0	0	0	0	137112	0	0
P	4040	162.08	9.76259	C4H11N5S	161.073		4-Acetyl-2-isopropenylpyridine	C10H11NO	Constit. of Mentha gentilis oil	0	0	0	0	0	0	0	0	0	0	0	0	0	0	0	0	0	0	0	0	0	0	0	0	0	0	210153	0	163205	0	179524	0	0	0	0	0	0	0	0	0
P	4771	162.082	10.1113		161.075		Boschniakine; (R)-form	C10H11NO	Alkaloid from Boschniakia rossica, Pedicularis ludwigi, Pedicularis olgae, Plantago albicans, Plantago indica, Plantago major, Plantago notata, Plantago psyllium (African plantain), Plantago ramosa, Tecoma radicans and Tecoma stans. Also found in the defence substance of Megacrania tsudai	2174.67	0	0	0	0	6177.31	10484.6	0	0	0	0	7573.85	1687.19	7089.91	0	0	0	0	3834.51	6989.55	0	0	0	0	0	0	0	0	0	0	0	0	0	129419	0	0	118376	0	0	0
P	4295	162.083	9.76298		161.076		Boschniakine; (ξ)-form	C10H11NO		0	0	0	0	0	0	0	0	0	0	0	0	0	0	0	0	0	0	0	0	0	0	0	0	0	0	0	253301	0	160141	0	0	0	0	0	126859	0	0	0	391988
P	3692	162.085	9.76029	CH7N9O	161.077		2-Butenoic acid; (E)-form, Anilide	C10H11NO		0	0	0	0	0	0	0	0	0	0	0	0	0	0	0	0	0	0	0	0	0	0	0	0	0	405483	0	0	0	0	0	0	0	0	0	0	0	0	358382	0
P	4859	162.087	9.77902	C5H11N3O3	161.079		3,4-Dihydro-1(2H)-isoquinolinone; NH-form, N-Me	C10H11NO		0	0	0	0	0	0	0	0	0	0	0	0	0	0	0	0	0	0	0	0	0	0	0	0	0	0	0	0	0	0	0	0	0	0	146271	0	0	264133	0	0
P	4001	162.088	9.76188	C5H11N3O3	161.081		2,3-Dihydro-4(1H)-quinolinone; N-Me	C10H11NO		0	0	0	0	0	0	0	0	0	0	0	0	0	0	0	0	0	0	0	0	0	0	0	0	0	0	258360	0	165940	0	124659	135705	136989	0	0	0	0	0	0	0
P	4766	162.09	10.1463	C4H12N5P	161.083		2-Hydroxy-3-methyl-1H-indole; (±)-form, N-Me	C10H11NO		4660.37	0	0	0	0	4360.94	8483.49	0	0	0	0	4253.02	1510.01	3529.96	0	0	0	0	3477.97	5628.29	0	0	0	0	0	0	0	0	0	0	0	0	0	134475	0	0	304965	0	0	0
P	4304	162.091	9.76298	C10H11NO	161.084	-0.321836	Streptazone C	C10H11NO	Prod. by Streptomyces sp. FORM5	0	0	0	0	0	0	0	0	0	0	0	0	0	0	0	0	0	0	0	0	0	0	0	0	0	0	0	180443	0	117721	0	0	0	0	0	153860	0	0	0	354886
P	3710	162.093	9.76029		161.085					0	0	0	0	0	0	0	0	0	0	0	0	0	0	0	0	0	0	0	0	0	0	0	0	0	267548	0	0	0	0	0	0	0	0	0	0	0	0	267086	0
							Guanidine; N-Benzoyl	C8H9N3O
P	4866	162.095	9.77664	C7H15NOS	161.087					0	0	0	0	0	0	0	0	0	0	0	0	0	0	0	0	0	0	0	0	0	0	0	0	0	0	0	0	0	0	0	0	0	0	208483	0	0	286311	0	0
P	6303	162.096	9.77654	H7N11	161.089					0	0	0	0	0	0	0	0	0	0	0	0	0	0	0	0	0	0	0	0	0	0	0	0	0	0	0	0	0	0	0	0	0	0	0	0	0	0	0	0
P	5938	162.099	9.77618	C4H11N5O2	161.092					0	0	0	0	0	0	0	0	0	0	0	0	0	0	0	0	0	0	0	0	0	0	0	0	0	0	0	0	0	0	0	0	0	0	0	0	0	0	0	348976
P	5656	162.101	9.77702		161.094					0	0	0	0	0	0	0	0	0	0	0	0	0	0	0	0	0	0	0	0	0	0	0	0	0	0	0	0	0	0	0	0	0	0	0	0	0	0	211170	0
P	5369	162.102	9.76814	C9H11N3	161.095	-2.72445				0	0	0	0	0	0	0	0	0	0	0	0	0	0	0	0	0	0	0	0	0	0	0	0	0	0	0	0	0	0	0	0	0	0	0	0	0	214010	0	0
P	323	164.08	9.57599		163.072					0	156044	110033	114554	156314	0	0	0	0	0	0	0	0	0	0	0	0	0	0	0	0	0	0	0	0	0	0	0	0	0	0	0	0	0	0	0	0	0	0	0
P	1057	164.081	9.44889	C2H10N7P	163.073					0	0	0	0	3662.81	193696	0	0	0	0	0	0	154590	25195.8	0	0	0	27481.1	28433.7	0	0	0	0	0	0	0	11691	0	0	0	7704.84	2366.66	8425.07	709.209	0	0	4573.21	0	0	0
P	1482	164.082	9.88328	C8H9N3O	163.075	2.59235				3239.25	0	0	0	0	193432	273816	0	0	0	279643	210144	0	25195.8	45435.5	0	0	0	28433.7	34620.4	0	0	0	0	0	0	0	15708.3	0	0	0	0	0	14575	0	0	4573.21	0	0	32628.3
P	1868	164.083	9.58135	C6H14NO2P	163.076					0	0	0	0	0	0	0	397441	0	365513	280043	0	0	0	0	0	0	0	0	0	0	0	0	0	0	0	0	0	0	0	0	0	0	0	0	0	0	0	0	0
P	3385	164.084	2.33752	C6H14NO2P	163.077		4-Amino-4-deoxyarabinose; α-D-Pyranose-form, Me glycoside	C6H13NO4		0	0	0	0	0	0	0	0	0	0	0	0	0	0	0	0	0	0	0	0	0	53759.5	56152.2	0	0	0	0	0	0	0	0	0	0	0	0	0	0	0	0	0
P	2295	164.085	9.59255	C5H13N3OS	163.078		4-Amino-4-deoxyarabinose; β-L-Pyranose-form, Me glycoside	C6H13NO4		0	0	0	0	0	0	0	0	394298	0	0	0	0	0	0	0	0	0	0	0	0	0	0	0	0	0	0	0	0	0	0	0	0	0	0	0	0	0	0	0
P	3424	164.085	2.3622	C5H13N3OS	163.078		2-Amino-2-deoxyribose; β-L-Pyranose-form, Me glycoside	C6H13NO4		0	0	0	0	0	0	0	0	0	0	0	0	0	0	0	0	0	0	0	0	0	0	0	58396	54961.3	0	0	0	0	0	0	0	0	0	0	0	0	0	0	0
P	3417	164.086	9.59142		163.079		3-Amino-3-deoxyxylose; D-form, N-Me	C6H13NO4	Constit. of the antibiotics Gentamicin A and Sisomicin B	0	0	0	0	0	0	0	0	0	0	0	0	0	0	0	0	0	0	0	0	0	0	0	108690	0	0	0	0	0	0	0	0	0	0	0	0	0	0	0	0
P	6637	164.086	2.35478		163.079		3-Amino-3-deoxyxylose; β-D-Pyranose-form, Me glycoside	C6H13NO4		0	0	0	0	0	0	0	0	0	0	0	0	0	0	0	0	0	0	0	0	0	0	0	0	0	0	0	0	0	0	0	0	0	0	0	0	0	0	0	0
P	143	164.088	9.57603		163.08		3-Amino-3-deoxyxylose; β-L-Pyranose-form, Me glycoside	C6H13NO4		0	765060	627302	640556	800414	0	0	0	0	0	0	0	0	0	0	0	0	0	0	0	0	0	0	0	0	0	0	0	0	0	0	0	0	0	0	0	0	0	0	0
P	925	164.089	9.44599	C2H9N7O2	163.081		3-Amino-3-deoxyxylose; α-D-Pyranose-form, Me glycoside	C6H13NO4		0	706261	0	0	2825.67	901015	0	0	0	0	0	0	782636	89934.9	0	0	0	95285.4	106340	0	0	0	0	0	0	0	36641.4	0	0	0	47245.3	10631.5	31973.7	0	0	0	36767.5	0	0	0
P	1376	164.091	9.57819		163.083		2-Amino-2,6-dideoxygalactose; DL-form	C6H13NO4	Constit. of the polysaccharide from Pseudomonas aeruginosa	0	0	0	0	0	0	1.0769e+06	0	0	0	1.08857e+06	916613	0	0	0	0	0	0	101560	110336	0	0	0	0	0	0	0	0	0	0	0	0	0	0	0	0	0	0	0	110606
P	1808	164.092	9.58226	C6H13NO4	163.084	-0.110806	2-Amino-2,3-dideoxy-ribo-hexose; D-form	C6H13NO4	Component of CKQ67 and Lividomycin B GZO69	0	0	0	0	0	0	0	1.30044e+06	0	1.23653e+06	0	0	0	0	118054	0	0	0	0	0	125911	0	135662	0	0	0	0	0	0	0	0	0	0	0	0	0	0	0	0	0
P	2243	164.093	9.57919	C7H9N5	163.086	0.323692				0	0	0	0	0	0	0	0	1.27992e+06	0	0	0	0	0	0	0	0	0	0	0	0	141613	0	0	139693	0	0	0	0	0	0	0	0	0	0	0	0	0	136225	0
P	6636	164.094	2.35479	C5H14N3OP	163.087		2,3,5-Triamino-2,3,5-trideoxyarabinonic acid; D-form	C5H13N3O3	Occurs as a constituent of streptolidine	0	0	0	0	0	0	0	0	0	0	0	0	0	0	0	0	0	0	0	0	0	0	0	0	0	0	0	0	0	0	0	0	0	0	0	0	0	0	0	0
P	2918	164.095	9.58791	C5H14N3OP	163.087					0	0	0	0	0	0	0	0	0	0	0	0	0	0	0	138026	0	0	0	0	0	0	0	175577	0	0	0	0	0	0	0	0	0	0	0	0	0	133595	0	0
P	6671	164.096	2.35402	C5H14N3OP	163.088					0	0	0	0	0	0	0	0	0	0	0	0	0	0	0	0	0	0	0	0	0	0	0	0	0	0	0	0	0	0	0	0	0	0	0	0	0	0	0	0
P	117	164.096	9.57392	C4H13N5S	163.089					0	1.76355e+06	1.69746e+06	1.66878e+06	1.91165e+06	0	0	0	0	0	0	0	0	0	0	0	150291	0	0	0	0	0	0	0	0	0	116404	0	0	0	0	0	0	0	0	0	0	0	0	0
P	904	164.097	9.45791	C4H13N5S	163.09		Abikoviromycin; 1,7a-Dihydro	C10H13NO	Prod. by Streptomyces olivaceus, Streptomyces viridochromogenes, Streptomyces reticuli and Streptomyces anulatus	0	1.54171e+06	0	0	3163.9	1.9433e+06	0	0	0	0	0	0	1.74311e+06	186489	0	0	0	178037	184245	0	0	0	0	0	0	0	77309.4	0	0	0	77612.4	22658.2	67430.3	0	0	0	74067.7	0	0	0
P	1363	164.099	9.57587		163.091		2-Aminoacetophenone; N,N-Di-Me	C10H13NO	Isol. from Desmodium gangeticum	0	0	0	0	0	0	1.99622e+06	0	0	0	1.95487e+06	1.87503e+06	0	0	0	0	0	0	187325	190021	0	0	0	0	0	0	0	0	0	0	0	0	0	79469	0	0	0	0	0	246381
P	1796	164.1	9.56959	CH9N9O	163.093		Butanoic acid; Anilide	C10H13NO		0	0	0	0	0	0	0	2.13522e+06	0	2.0573e+06	0	0	0	0	185924	0	0	0	0	0	193460	0	200852	0	0	0	0	105889	0	89889	0	0	0	0	0	85029.7	0	0	0	0
P	2231	164.101	9.57323	CH9N9O	163.094		5,6-Dihydro-2-(1,3-pentadienyl)-4(1H)-pyridinone; (E,E)-form	C10H13NO	Prod. by Streptomyces sp. FORM5	0	0	0	0	0	0	0	0	2.10945e+06	0	0	0	0	0	0	0	0	0	0	0	0	192935	0	0	187491	128643	0	0	0	0	0	0	0	0	0	0	0	0	308425	0
P	2903	164.103	9.58442	C5H13N3O3	163.095	-1.61622	4-Isopropylbenzaldehyde; (E)-Oxime	C10H13NO		0	0	0	0	0	0	0	0	0	0	0	0	0	0	0	188406	0	0	0	0	0	0	0	186912	0	0	0	0	0	0	0	0	0	0	87857.2	0	0	371779	0	0
P	114	164.104	9.56548		163.097		4-Methylbenzoic acid; Dimethylamide	C10H13NO		0	2.01033e+06	2.18414e+06	2.07711e+06	2.22924e+06	0	0	0	0	0	0	0	0	0	0	0	184514	0	0	0	0	0	0	0	0	0	113447	0	100483	0	0	87646.3	83823.3	0	0	0	0	0	0	0
P	901	164.105	9.46557	C4H14N5P	163.098		Pediculidine; 8,9-Dihydro, 7-alcohol	C10H13NO	Alkaloid from Pedicularis olgae and Verbascum nobile (Scrophulariaceae)	0	0	0	0	2738.58	2.08011e+06	0	0	0	0	0	0	1.97597e+06	197772	0	0	0	200316	194814	0	0	0	0	0	0	0	92531.8	0	0	0	82809	15929.1	75758	0	0	0	257912	0	0	0
P	1362	164.107	9.57587	C10H13NO	163.1	-0.840681	2-Phenylethylamine; N-Ac	C10H13NO	Prod. by Streptomyces sp. Lz53, Tricladium sp. GU288817 and a marine-derived Bacillus subtilis. Also isol. from Gracilaria lemaneiformis	0	0	0	0	0	0	2.06764e+06	0	0	0	1.92781e+06	1.96622e+06	0	0	0	0	0	0	199540	191241	0	0	0	0	0	0	0	0	0	0	0	0	0	83776.5	0	0	0	0	0	384038
P	1799	164.108	9.57581	C10H13NO	163.101					0	0	0	0	0	0	0	1.94168e+06	0	1.92259e+06	0	0	0	0	161794	0	0	0	0	0	184996	0	178694	0	0	0	0	87459	0	0	0	0	0	0	0	128458	0	0	0	0
P	2237	164.109	9.57323		163.102					0	0	0	0	0	0	0	0	1.88438e+06	0	0	0	0	0	0	0	0	0	0	0	0	164786	0	0	154914	117304	0	0	0	0	0	0	0	0	0	0	0	0	301215	0
P	2916	164.111	9.58025	C7H17NOS	163.104					0	0	0	0	0	0	0	0	0	0	0	0	0	0	0	152373	0	0	0	0	0	0	0	131404	0	0	0	0	0	0	0	0	0	0	215942	0	0	339724	0	0
P	119	164.112	9.57598	H9N11	163.105					0	1.44132e+06	1.70173e+06	1.54487e+06	1.63547e+06	0	0	0	0	0	0	0	0	0	0	0	139137	0	0	0	0	0	0	0	0	0	0	0	0	0	0	0	0	0	0	0	0	0	0	0
P	907	164.113	9.45791	C4H13N5O2	163.106					0	1.27965e+06	0	0	4580.48	1.50384e+06	0	0	0	0	0	0	1.43397e+06	143334	0	0	0	139935	134509	0	0	0	0	0	0	0	60660.7	0	0	0	52909.9	20942.7	57553.7	0	0	0	72489.7	0	0	0
P	1366	164.115	9.57819	C4H13N5O2	163.108					0	0	0	0	0	0	1.39439e+06	0	0	0	1.30088e+06	1.29157e+06	0	0	0	0	0	0	130341	123700	0	0	0	0	0	0	0	0	0	0	0	0	0	0	0	0	0	0	0	173965
P	1809	164.116	9.58559		163.109					0	0	0	0	0	0	0	1.30267e+06	0	1.17885e+06	0	0	0	0	106780	0	0	0	0	0	118715	0	109703	0	0	0	0	0	0	0	0	0	0	0	0	0	0	0	0	0
P	2244	164.118	9.57919	C9H13N3	163.11					0	0	0	0	0	0	0	0	1.24425e+06	0	0	0	0	0	0	0	0	0	0	0	0	100414	0	0	94142.9	0	0	0	0	0	0	0	0	0	0	0	0	0	225626	0
P	2965	164.119	9.58791	C9H13N3	163.112					0	0	0	0	0	0	0	0	0	0	0	0	0	0	0	95872.4	0	0	0	0	0	0	0	77043.1	0	0	0	0	0	0	0	0	0	0	0	0	0	122957	0	0
P	134	164.12	9.57598	C7H18NOP	163.113					0	872979	1.269e+06	1.1194e+06	1.06261e+06	0	0	0	0	0	0	0	0	0	0	0	89941.5	0	0	0	0	0	0	0	0	0	0	0	0	0	0	0	0	0	0	0	0	0	0	0
P	924	164.121	9.4448	C6H17N3S	163.114					0	813136	0	0	5932.48	1.00439e+06	0	0	0	0	0	0	963799	153552	0	0	0	91545	84667	0	0	0	0	0	0	0	34812.2	0	0	0	34728.6	34966.8	40827	0	0	0	38313.1	0	0	0
P	1388	164.123	9.87242		163.116					4627.88	0	0	0	0	0	940626	0	0	0	728146	855410	0	97264.6	76909.8	0	0	0	80830.7	81401.1	73078.6	0	0	0	0	0	0	28867.7	0	0	0	0	0	44740.1	0	0	38313.1	0	0	112465
P	1824	164.124	9.58104		163.117					0	0	0	0	0	0	0	882844	0	779863	785227	0	0	0	103982	0	0	0	0	0	78632.9	0	71258.4	0	0	0	0	0	0	0	0	0	0	0	0	0	0	0	0	0
P	2261	164.126	9.59255	C3H13N7O	163.118					0	0	0	0	0	0	0	0	825481	0	0	0	0	0	0	0	0	0	0	0	0	0	0	0	0	0	0	0	0	0	0	0	0	0	0	0	0	0	0	0
P	163	164.128	9.57182	C7H17NO3	163.121					0	532650	712165	633701	673845	0	0	0	0	0	0	0	0	0	0	0	0	0	0	0	0	0	0	0	0	0	0	0	0	0	0	0	0	0	0	0	0	0	0	0
P	950	164.13	9.39658		163.122					0	0	0	0	6010.59	539662	0	0	0	0	0	0	581121	53498.7	0	0	0	58482.2	59699.5	0	0	0	0	0	0	0	23938.4	0	0	0	21106.1	4419.25	27311.2	0	0	0	16777.9	0	0	0
P	1415	164.131	9.82729	C6H18N3P	163.124					10754.4	0	0	0	0	513971	562613	0	0	0	427901	541503	0	53498.7	6944.18	0	0	0	59699.5	51320.3	0	0	0	0	0	0	0	17407.8	0	0	0	0	0	31487.8	0	0	16777.9	0	0	38216.8
P	1852	164.132	9.57579		163.125					0	0	0	0	0	0	0	487100	0	466476	491853	0	0	0	0	0	0	0	0	0	0	0	0	0	0	0	0	0	0	0	0	0	0	0	0	0	0	0	0	0
P	2290	164.134	9.59255		163.127					0	0	0	0	0	0	0	0	500176	0	0	0	0	0	0	0	0	0	0	0	0	0	0	0	0	0	0	0	0	0	0	0	0	0	0	0	0	0	0	0
P	244	164.137	9.57182	C2H13N9	163.129		2-Butene-1-thiol; (E)-form, S-Ph	C10H12S		0	252874	338099	326021	333229	0	0	0	0	0	0	0	0	0	0	0	0	0	0	0	0	0	0	0	0	0	0	0	0	0	0	0	0	0	0	0	0	0	0	0
P	1021	164.138	9.41882		163.131					0	0	0	0	7579.24	259530	0	0	0	0	0	0	240463	18863.9	0	0	0	32109	31254.3	0	0	0	0	0	0	0	11244.2	0	0	0	7754.31	3499.5	16235.9	0	0	0	4812.56	0	0	0
P	1507	164.139	9.85945	C6H17N3O2	163.132					6089.07	0	0	0	0	241377	243778	0	0	0	202124	221942	0	18863.9	20045.8	0	0	0	31254.3	20794.5	0	0	0	0	0	0	0	8064.36	0	0	0	0	0	13591.1	0	0	4812.56	0	0	16435.5
							1,5-Anhydroglucitol	C6H12O5
P	1962	164.141	9.57579		163.133		1,5-Anhydroglucitol; D-form	C6H12O5	Occurs in Polygala tenuifolia, Polygala vulgaris, Polygala amara, Polygala senega and in human cerebrospinal fluid	0	0	0	0	0	0	0	242802	0	220625	199952	0	0	0	0	0	0	0	0	0	0	0	0	0	0	0	0	0	0	0	0	0	0	0	0	0	0	0	0	0
							2,5-Anhydroglucitol	C6H12O5
P	2366	164.142	9.59255		163.135		2,5-Anhydroglucitol; D-form	C6H12O5	Prod. by Fusarium solani NRRL 18883	0	0	0	0	0	0	0	0	207622	0	0	0	0	0	0	0	0	0	0	0	0	0	0	0	0	0	0	0	0	0	0	0	0	0	0	0	0	0	0	0
P	477	164.145	9.57182		163.137		1,5-Anhydromannitol; D-form	C6H12O5	Occurs in fruit of Styrax obassia	0	97738.5	118677	104283	100330	0	0	0	0	0	0	0	0	0	0	0	0	0	0	0	0	0	0	0	0	0	0	0	0	0	0	0	0	0	0	0	0	0	0	0
P	1230	164.146	9.58563	C8H21NS	163.139		6-Deoxyallose; α-D-Furanose-form	C6H12O5		0	0	0	0	4496.92	94025.5	0	0	0	0	0	0	90021.8	5480.79	0	0	0	13972.3	10114.8	0	0	0	0	0	0	0	3687.35	0	0	0	5085.67	0	5939.37	2335.26	0	0	5877.65	0	0	0
P	1736	164.148	9.57587	C8H21NS	163.14		6-Deoxyallose; D-form	C6H12O5	Found in plant glycosides, e.g. from Xysmalobium undulatum	0	0	0	0	0	0	75768.9	0	0	0	80488.3	86311.1	0	0	0	0	0	0	0	0	0	0	0	0	0	0	0	0	0	0	0	0	0	0	0	0	0	0	0	0
P	5703	165.073	8.83441	C10H12S	164.066	-0.166401	6-Deoxyaltrose	C6H12O5	Only 6-deoxyhexose and fucose found in glycoproteins. Residue present in some strains of Eubacterium saburreum and lipopolysaccharide of Yersinia enterocolitica	0	0	0	0	0	0	0	0	0	0	0	0	0	0	0	0	0	0	0	0	0	0	0	0	0	0	0	0	0	0	0	0	0	0	0	0	0	0	71391.7	0
P	5140	165.075	8.83925		164.067		6-Deoxyaltrose; L-form	C6H12O5		0	0	0	0	0	0	0	0	0	0	0	0	0	0	0	0	0	0	0	0	0	0	0	0	0	0	0	0	0	0	0	0	0	0	0	0	0	121101	0	0
P	6159	165.076	8.83694	CH9N8P	164.069	2.96459	5-Deoxy-3-C-hydroxymethyllyxose	C6H12O5	Occurs in antibiotic compds. derived from microorganisms, mainly strains of Streptomyces. Constit. of Bluensomycin, Glebomycin and dihydrostreptobiosamine	0	0	0	0	0	0	0	0	0	0	0	0	0	0	0	0	0	0	0	0	0	0	0	0	0	0	0	0	0	0	0	0	0	0	0	0	0	0	0	0
P	4776	165.079	8.8311	C5H13N2O2P	164.072					0	0	0	0	0	0	0	0	0	0	0	0	0	0	0	0	0	0	0	0	0	0	0	0	0	0	0	0	0	0	0	0	0	68915.3	0	0	0	0	0	432566
P	5954	165.079	10.4016	C5H13N2O2P	164.072					0	0	0	0	0	0	0	0	0	0	0	0	0	0	0	0	0	0	0	0	0	0	0	0	0	0	0	0	0	0	0	0	0	0	0	0	0	0	0	164476
P	4267	165.08	8.81459	C4H12N4OS	164.073					0	0	0	0	0	0	0	0	0	0	0	0	0	0	0	0	0	0	0	0	0	0	0	0	0	0	0	112231	0	98437.4	0	0	0	0	0	88875.2	0	0	0	0
P	3768	165.081	10.3774	C4H12N4OS	164.074		Glutamic acid; (S)-form, NH4 salt	C5H12N2O4		0	0	0	0	0	0	0	0	0	0	0	0	0	0	0	0	0	0	0	0	0	0	0	0	0	78937.7	0	0	0	0	0	0	0	0	0	0	0	0	228759	0
P	3610	165.081	8.83168	C4H12N4OS	164.074					0	0	0	0	0	0	0	0	0	0	0	0	0	0	0	0	0	0	0	0	0	0	0	0	0	143014	0	0	0	0	0	0	0	0	0	0	0	0	552815	0
P	4877	165.083	10.4033	C10H13P	164.075					0	0	0	0	0	0	0	0	0	0	0	0	0	0	0	0	0	0	0	0	0	0	0	0	0	0	0	0	0	0	0	0	0	0	73900.1	0	0	189629	0	0
P	4824	165.083	8.83706	C10H13P	164.076		2,6-Purinediamine; N6-Me	C6H8N6		0	0	0	0	0	0	0	0	0	0	0	0	0	0	0	0	0	0	0	0	0	0	0	0	0	0	0	0	0	0	0	0	0	0	150390	0	0	768630	0	0
P	4047	165.084	10.3825	CH8N8O2	164.077					0	0	0	0	0	0	0	0	0	0	0	0	0	0	0	0	0	0	0	0	0	0	0	0	0	0	89893.5	0	71939.1	0	71852.8	0	0	0	0	0	0	0	0	0
P	3863	165.085	8.8195	CH8N8O2	164.077					0	0	0	0	0	0	0	0	0	0	0	0	0	0	0	0	0	0	0	0	0	0	0	0	0	0	231576	0	191423	0	213254	203633	208663	0	0	0	0	0	0	0
P	4780	165.086	10.6645	C7H17PS	164.079		Benzoic acid; Propyl ester	C10H12O2	Present in cherry and clove stem	1367.37	0	0	0	0	1970.01	5475.9	0	0	0	0	2446.01	3887.22	1889.94	0	0	0	7091.3	2679.13	0	0	0	0	0	0	0	0	0	0	0	76341.8	0	0	77796.6	0	0	119987	0	0	0
P	4734	165.086	9.34631	C7H17PS	164.079		5-Butyl-6-methyl-2H-pyran-2-one; 1',2'-Didehydro(E-)	C10H12O2	Prod. by fungal culture LL-11G219	2128.64	0	0	0	0	3070	3660.59	0	0	0	0	3933.57	2512.63	4138.69	0	0	0	0	4353.88	3938.94	0	0	0	0	0	0	0	0	0	0	221674	0	0	262319	0	0	267963	0	0	1.3373e+06
P	5871	165.087	10.4016	C5H12N2O4	164.08	1.43003	3-Carene-2,5-dione	C10H12O2		0	0	0	0	0	0	0	0	0	0	0	0	0	0	0	0	0	0	0	0	0	0	0	0	0	0	0	0	0	0	0	0	0	0	0	0	0	0	0	274313
P	4131	165.088	8.82561	C6H8N6	164.08		2-Caren-8,4-olide; (1R,4R,6S,7S)-form	C10H12O2	Metab. of Periconia sp. F-31	0	0	0	0	0	0	0	0	0	0	0	0	0	0	0	0	0	0	0	0	0	0	0	0	0	0	0	303506	0	291975	0	0	0	0	0	358650	0	0	0	1.50495e+06
P	3748	165.089	10.3771	C6H8N6	164.081	1.2853	2,4-Decadien-9-ynoic acid; (2E,4E)-form	C10H12O2		0	0	0	0	0	0	0	0	0	0	0	0	0	0	0	0	0	0	0	0	0	0	0	0	0	84974.6	0	0	0	73801.5	0	0	0	0	0	103402	0	0	309745	0
P	3501	165.089	8.83168	C4H13N4OP	164.082		2,8-Decadien-6-ynoic acid; (2Z,8Z)-form	C10H12O2		0	0	0	0	0	0	0	0	0	0	0	0	0	0	0	0	0	0	0	0	0	0	0	0	0	369373	0	0	0	0	0	0	0	0	0	0	0	0	1.57306e+06	0
P	4869	165.091	10.4005	C10H12O2	164.083	-2.34424	2-Decene-4,6-diyne-1,10-diol; (E)-form	C10H12O2	Isol. from the fungus Polyporus anthracophilus and from Centaurea ruthenica	0	0	0	0	0	0	0	0	0	0	0	0	0	0	0	0	0	0	0	0	0	0	0	0	0	0	0	0	0	0	0	0	0	0	200217	0	0	288249	0	0
P	4800	165.091	8.83706	C10H12O2	164.084	-0.267377	2-Decene-4,6-diyne-1,10-diol; (E)-form	C10H12O2	Isol. from the fungus Polyporus anthracophilus and from Centaurea ruthenica	0	0	0	0	0	0	0	0	0	0	0	0	0	0	0	0	0	0	0	0	0	0	0	0	0	0	0	0	0	0	0	0	0	0	426273	0	0	1.82993e+06	0	0
P	417	165.092	9.57182	C3H12N6S	164.085					0	106027	93039.9	97525.7	108597	0	0	0	0	0	0	0	0	0	0	0	0	0	0	0	0	0	0	0	0	0	0	0	0	0	0	0	0	0	0	0	0	0	0	0
P	3809	165.093	8.8195		164.086					0	0	0	0	0	0	0	0	0	0	0	0	0	0	0	0	0	0	0	0	0	0	0	0	0	0	420105	0	399218	0	410381	409248	424713	0	0	0	0	0	0	0
P	1163	165.093	9.06995	C7H16O2S	164.086					0	0	0	0	3899.09	125347	0	0	0	0	0	0	105905	16753.1	0	0	0	15846	16172.1	0	0	0	0	0	0	0	426083	0	0	0	416629	412604	425740	0	0	0	4984.25	0	0	0
P	4728	165.095	9.33605	C7H16O2S	164.087					2091.6	0	0	0	0	6657.51	4399.82	0	0	0	0	5531.15	4541.54	6810.92	0	0	0	0	3626.24	2476.64	0	0	0	0	0	0	0	0	0	0	416629	0	0	517353	0	0	515258	0	0	2.22969e+06
P	1594	165.095	9.71172	H8N10O	164.088					2091.6	0	0	0	0	127485	149814	0	0	0	147385	123179	0	16753.1	19612	0	0	0	16172.1	15218.3	0	0	0	0	0	0	0	9512.65	0	0	0	0	0	437111	0	0	3248.57	0	0	2.21427e+06
P	4107	165.096	8.82561	C7H18P2	164.089					0	0	0	0	0	0	0	0	0	0	0	0	0	0	0	0	0	0	0	0	0	0	0	0	0	0	0	441536	0	440905	0	0	0	0	0	517382	0	0	0	2.33163e+06
P	1979	165.096	9.57579	C7H18P2	164.089					0	0	0	0	0	0	0	173694	0	151103	140908	0	0	0	0	0	0	0	0	0	0	0	0	0	0	0	0	0	0	0	0	0	0	0	0	0	0	0	0	0
P	3483	165.098	8.83168	C4H12N4O3	164.09					0	0	0	0	0	0	0	0	0	0	0	0	0	0	0	0	0	0	0	0	0	0	0	0	0	460148	0	0	0	0	0	0	0	0	0	0	0	0	2.29898e+06	0
P	2364	165.098	9.57587	C4H12N4O3	164.09					0	0	0	0	0	0	0	0	168324	0	0	0	0	0	0	0	0	0	0	0	0	0	0	0	0	0	0	0	0	0	0	0	0	0	0	0	0	0	0	0
P	4796	165.099	8.83706	C4H12N4O3	164.092					0	0	0	0	0	0	0	0	0	0	0	0	0	0	0	0	0	0	0	0	0	0	0	0	0	0	0	0	0	0	0	0	0	0	518354	0	0	2.34483e+06	0	0
P	272	165.1	9.57182	C3H13N6P	164.093					0	285107	253149	276734	249368	0	0	0	0	0	0	0	0	0	0	0	0	0	0	0	0	0	0	0	0	0	0	0	0	0	0	0	0	0	0	0	0	0	0	0
P	3806	165.101	8.8195	C3H13N6P	164.094					0	0	0	0	0	0	0	0	0	0	0	0	0	0	0	0	0	0	0	0	0	0	0	0	0	0	427067	0	455363	0	419806	448341	549937	0	0	0	0	0	0	0
P	1036	165.102	9.46942	C3H13N6P	164.094					0	0	0	0	5225.44	276198	0	0	0	0	0	0	250406	38661.3	0	0	0	27241.8	30814.9	0	0	0	0	0	0	0	13111.4	0	0	0	14630.2	3415.83	11658.2	9128.02	0	0	24932.8	0	0	0
P	4729	165.103	9.32322	C9H12N2O	164.095					7768.41	0	0	0	0	7436	7728.46	0	0	0	0	18461.9	5739.2	8463.29	0	0	0	0	9153.54	6210.73	0	0	0	0	0	0	0	0	0	0	391240	0	0	524486	0	0	441341	0	0	2.09623e+06
P	1496	165.103	9.8523	C7H17O2P	164.096					7768.41	0	0	0	0	92836.1	323785	0	0	0	236054	314549	0	38661.3	27810	0	0	0	30814.9	31438.9	0	0	0	0	0	0	0	15476.1	0	0	0	0	0	16638.8	0	0	24932.8	0	0	33343.6
P	4118	165.104	8.82561	C7H17O2P	164.097					0	0	0	0	0	0	0	0	0	0	0	0	0	0	0	0	0	0	0	0	0	0	0	0	0	0	0	379849	0	377210	0	0	0	0	0	438081	0	0	0	2.10441e+06
P	1915	165.104	9.57579	C7H17O2P	164.097					0	0	0	0	0	0	0	314825	0	279167	284269	0	0	0	0	0	0	0	0	0	0	0	0	0	0	0	0	0	0	0	0	0	0	0	0	0	0	0	0	0
P	3495	165.106	8.83168	C6H16N2OS	164.099		1,3-Dihydroxy-2-propanone; Di-Et acetal	C7H16O4		0	0	0	0	0	0	0	0	0	0	0	0	0	0	0	0	0	0	0	0	0	0	0	0	0	364827	0	0	0	0	0	0	0	0	0	0	0	0	1.95907e+06	0
P	2328	165.106	9.57587	C6H16N2OS	164.099		2-Oxopropanal; Tetra-Me acetal	C7H16O4		0	0	0	0	0	0	0	0	321889	0	0	0	0	0	0	0	0	0	0	0	0	0	0	0	0	0	0	0	0	0	0	0	0	0	0	0	0	0	0	0
P	4804	165.107	8.83706		164.1					0	0	0	0	0	0	0	0	0	0	0	0	0	0	0	0	0	0	0	0	0	0	0	0	0	0	0	0	0	0	0	0	0	0	390515	0	0	1.82288e+06	0	0
P	264	165.109	9.57182	C3H12N6O2	164.101		1,3-Dihydroxy-2-propanone; Di-Et acetal	C7H16O4		0	290215	393018	355915	335930	0	0	0	0	0	0	0	0	0	0	0	0	0	0	0	0	0	0	0	0	0	0	0	0	0	0	0	0	0	0	0	0	0	0	0
P	3838	165.109	8.8195	C3H12N6O2	164.102		2-Oxopropanal; Tetra-Me acetal	C7H16O4		0	0	0	0	0	0	0	0	0	0	0	0	0	0	0	0	0	0	0	0	0	0	0	0	0	0	296240	0	325277	0	290045	362458	345568	0	0	0	0	0	0	0
P	1032	165.11	9.43478	C3H12N6O2	164.103					0	0	0	0	5266.97	308723	0	0	0	0	0	0	272208	37303.5	0	0	0	32304.6	34999.9	0	0	0	0	0	0	0	13896.5	0	0	0	12950.5	8610.36	19395.2	5056.55	0	0	23180.3	0	0	0
P	4733	165.111	9.28601		164.104					4909.4	0	0	0	0	10367.7	8094.23	0	0	0	0	17495.6	6524.46	6051.49	0	0	0	0	6079.96	7233.7	0	0	0	0	0	0	0	0	0	0	294532	0	0	313815	0	0	300194	0	0	1.37528e+06
P	1505	165.111	9.87375	C7H16O4	164.104					4909.4	0	0	0	0	93358.5	311202	0	0	0	213519	325443	0	37303.5	24539.1	0	0	0	34999.9	30692.8	0	0	0	0	0	0	0	13287.3	0	0	0	0	0	15433.5	0	0	23180.3	0	0	25976.8
P	4155	165.112	8.82561	C7H16O4	164.105	0.856901				0	0	0	0	0	0	0	0	0	0	0	0	0	0	0	0	0	0	0	0	0	0	0	0	0	0	0	235257	0	252275	0	0	0	0	0	252233	0	0	0	1.37021e+06
P	1939	165.113	9.57579	C7H16O4	164.105	2.4035				0	0	0	0	0	0	0	249314	0	296000	275991	0	0	0	0	0	0	0	0	0	0	0	0	0	0	0	0	0	0	0	0	0	0	0	0	0	0	0	0	0
P	3540	165.114	8.83168	C8H12N4	164.107					0	0	0	0	0	0	0	0	0	0	0	0	0	0	0	0	0	0	0	0	0	0	0	0	0	227106	0	0	0	0	0	0	0	0	0	0	0	0	1.23319e+06	0
P	2339	165.114	9.57587	C8H12N4	164.107					0	0	0	0	0	0	0	0	345723	0	0	0	0	0	0	0	0	0	0	0	0	0	0	0	0	0	0	0	0	0	0	0	0	0	0	0	0	0	0	0
P	4811	165.116	8.83706	C6H17N2OP	164.108					0	0	0	0	0	0	0	0	0	0	0	0	0	0	0	0	0	0	0	0	0	0	0	0	0	0	0	0	0	0	0	0	0	0	229734	0	0	1.12057e+06	0	0
P	324	165.117	9.57182	C5H16N4S	164.109					0	223026	323560	294344	225131	0	0	0	0	0	0	0	0	0	0	0	0	0	0	0	0	0	0	0	0	0	0	0	0	0	0	0	0	0	0	0	0	0	0	0
P	3892	165.117	8.8195	C5H16N4S	164.11					0	0	0	0	0	0	0	0	0	0	0	0	0	0	0	0	0	0	0	0	0	0	0	0	0	0	177087	0	207800	0	217097	244055	206693	0	0	0	0	0	0	0
P	1102	165.118	9.39629		164.111					0	0	0	0	4216.3	199564	0	0	0	0	0	0	202601	24859	0	0	0	21622.5	26041.8	0	0	0	0	0	0	0	11053.1	0	0	0	18511	8866.53	17072.8	11838.2	0	0	10579.4	0	0	0
P	4740	165.119	9.20005		164.112					7814.13	0	0	0	0	14587.8	19601.4	0	0	0	0	18546.2	3688.93	6051.62	0	0	0	0	7030.8	13150	0	0	0	0	0	0	0	0	0	0	190084	0	0	170312	0	0	159228	0	0	856704
P	1586	165.12	9.83681		164.112					7814.13	0	0	0	0	162860	194571	0	0	0	143975	212643	0	24859	23019.8	0	0	0	26041.8	19834.9	0	0	0	0	0	0	0	17023.1	0	0	0	0	0	10215.7	0	0	10579.4	0	0	19444
P	4209	165.12	8.82561	C2H12N8O	164.113		4-Butyl-2,6-cycloheptadienone; (R)-form	C11H16O	Present in odoriferous oil from Dictyopteris spp.	0	0	0	0	0	0	0	0	0	0	0	0	0	0	0	0	0	0	0	0	0	0	0	0	0	0	0	161674	0	229102	0	0	0	0	0	138111	0	0	0	853908
P	2040	165.121	9.57579	C2H12N8O	164.113		6-Butyl-2,4-cycloheptadienone; (R)-form	C11H16O	Present in odoriferous oil from Dictyopteris spp.	0	0	0	0	0	0	0	198976	0	185547	176551	0	0	0	0	0	0	0	0	0	0	0	0	0	0	0	0	0	0	0	0	0	0	0	0	0	0	0	0	0
P	3607	165.122	8.83168		164.115		4-Butylphenol; Me ether	C11H16O		0	0	0	0	0	0	0	0	0	0	0	0	0	0	0	0	0	0	0	0	0	0	0	0	0	134184	0	0	0	0	0	0	0	0	0	0	0	0	761644	0
P	2408	165.122	9.59255		164.115		2,6-Dimethyl-2,6,8-nonatrien-4-one; (E)-form	C11H16O	Constit. of the volatiles of eggs of the elm leaf beetle Xanthogaleruca luteola	0	0	0	0	0	0	0	0	180891	0	0	0	0	0	0	0	0	0	0	0	0	0	0	0	0	0	0	0	0	0	0	0	0	0	0	0	0	0	0	0
P	4835	165.124	8.83706	C6H16N2O3	164.116		2-Isopropyl-4-methylphenol; Me ether	C11H16O	Consit. of Senecio spp.	0	0	0	0	0	0	0	0	0	0	0	0	0	0	0	0	0	0	0	0	0	0	0	0	0	0	0	0	0	0	0	0	0	0	117687	0	0	689804	0	0
P	468	165.125	9.57182		164.118		3-Isopropyl-2-methylphenol; Me ether	C11H16O	Constit. of Piqueria trinervia	0	119976	143382	151519	122161	0	0	0	0	0	0	0	0	0	0	0	0	0	0	0	0	0	0	0	0	0	0	0	0	0	0	0	0	0	0	0	0	0	0	0
P	3966	165.126	8.8195	C5H17N4P	164.118		5-Isopropyl-2-methylphenol; Me ether	C11H16O	Isol. from heartwoods of Cupressus spp. and Chamaecyparis thyoides	0	0	0	0	0	0	0	0	0	0	0	0	0	0	0	0	0	0	0	0	0	0	0	0	0	0	115901	0	168913	0	144628	156431	117039	0	0	0	0	0	0	0
P	1241	165.126	9.56437	C5H17N4P	164.119		3-Methyl-2-(2-pentenyl)-2-cyclopenten-1-one	C11H16O		0	0	0	0	4625.67	108739	0	0	0	0	0	0	126090	16080.9	0	0	0	18749.8	20147.4	0	0	0	0	0	0	0	7542.84	0	0	0	5099.02	3129.39	16416.7	4916.12	0	0	8648.83	0	0	0
P	4757	165.127	9.20133	C11H16O	164.12	-0.645682	2-(4-Methylphenyl)-2-propanol; Me ether	C11H16O	Isol. from lime (Citrus aurantifolia) oil	7475.13	0	0	0	0	17970.7	14875.4	0	0	0	0	17077.9	2446.27	8184.82	0	0	0	0	9065.93	10989.6	0	0	0	0	0	0	0	0	0	0	110054	0	0	84224.8	0	0	93525.6	0	0	488759
P	4292	165.129	8.82561		164.121		Convolvicine	C10H16N2	Alkaloid from Convolvulus pseudocantabricus	0	0	0	0	0	0	0	0	0	0	0	0	0	0	0	0	0	0	0	0	0	0	0	0	0	0	0	137366	0	117083	0	0	0	0	0	75863.5	0	0	0	485940
P	2187	165.129	9.57579		164.122		Convolvicine	C10H16N2	Alkaloid from Convolvulus pseudocantabricus	0	0	0	0	0	0	0	103875	0	107704	102411	0	0	0	0	0	0	0	0	0	0	0	0	0	0	0	0	0	0	0	0	0	0	0	0	0	0	0	0	0
P	3749	165.13	8.83168	C8H20OS	164.123		Decanedioic acid; Dinitrile	C10H16N2		0	0	0	0	0	0	0	0	0	0	0	0	0	0	0	0	0	0	0	0	0	0	0	0	0	86730.6	0	0	0	0	0	0	0	0	0	0	0	0	408971	0
P	2493	165.13	9.57587	C8H20OS	164.123		2,5-Diisopropylpyrazine	C10H16N2	Prod. by Chondromyces crocatus and Paenibacillus polymyxa. Also prod. by microorganisms living on rotting pineapple (Ananas sativus)	0	0	0	0	0	0	0	0	99618.5	0	0	0	0	0	0	0	0	0	0	0	0	0	0	0	0	0	0	0	0	0	0	0	0	0	0	0	0	0	0	0
P	5034	165.132	8.83925	CH12N10	164.125		2,5-Dimethyl-3-(2-methylpropyl)pyrazine	C10H16N2	Prod. by various marine bacteria. Present in cephalic secretions of female cleptoparasitic bees Epeolus cruciger and Epeolus variegatus	0	0	0	0	0	0	0	0	0	0	0	0	0	0	0	0	0	0	0	0	0	0	0	0	0	0	0	0	0	0	0	0	0	0	0	0	0	349831	0	0
P	6152	165.133	8.83694		164.126		1',3,4,4',5,5',6,6'-Octahydro-2,3'-bipyridine	C10H16N2	Alkaloid from Lupinus formosus, Genista hystrix and Genista hystrix spp. legionensis (Leguminosae)	0	0	0	0	0	0	0	0	0	0	0	0	0	0	0	0	0	0	0	0	0	0	0	0	0	0	0	0	0	0	0	0	0	0	0	0	0	0	0	0
P	5778	165.136	8.84214		164.129		Trimethylpropylpyrazine	C10H16N2	Isol. from Corynebacterium glutamicum	0	0	0	0	0	0	0	0	0	0	0	0	0	0	0	0	0	0	0	0	0	0	0	0	0	0	0	0	0	0	0	0	0	0	0	0	0	0	0	221088
P	5456	165.139	8.84275	C10H16N2	164.131	0.195065	2,3-Pyridinedicarboxylic acid; Anhydride, N-oxide	C7H3NO4		0	0	0	0	0	0	0	0	0	0	0	0	0	0	0	0	0	0	0	0	0	0	0	0	0	0	0	0	0	0	0	0	0	0	0	0	0	0	183902	0
P	5113	165.14	8.83925	C8H21OP	164.133					0	0	0	0	0	0	0	0	0	0	0	0	0	0	0	0	0	0	0	0	0	0	0	0	0	0	0	0	0	0	0	0	0	0	0	0	0	150432	0	0
P	6265	165.142	8.83694	C7H20N2S	164.134					0	0	0	0	0	0	0	0	0	0	0	0	0	0	0	0	0	0	0	0	0	0	0	0	0	0	0	0	0	0	0	0	0	0	0	0	0	0	0	0
P	5912	165.144	8.84214		164.137					0	0	0	0	0	0	0	0	0	0	0	0	0	0	0	0	0	0	0	0	0	0	0	0	0	0	0	0	0	0	0	0	0	0	0	0	0	0	0	162390
P	5640	165.146	8.82628	C4H16N6O	164.139					0	0	0	0	0	0	0	0	0	0	0	0	0	0	0	0	0	0	0	0	0	0	0	0	0	0	0	0	0	0	0	0	0	0	0	0	0	0	152902	0
P	2172	166.014	8.92617	H3N7O2S	165.007	2.51601				0	0	0	0	0	0	0	84189.9	0	0	0	0	0	0	0	0	0	0	0	0	0	0	0	0	0	0	0	0	0	0	0	0	0	0	0	0	0	0	0	0
P	2491	166.015	8.92538	H5N7P2	165.008					0	0	0	0	0	0	0	0	86736.3	0	0	0	0	0	0	0	0	0	0	0	0	0	0	0	0	0	0	0	0	0	0	0	0	0	0	0	0	0	0	0
P	356	166.018	8.90884	C4H9NO2P2	165.011					0	323599	290940	608417	340915	0	0	0	0	0	0	0	0	0	0	0	0	0	0	0	0	0	0	0	0	0	0	0	0	0	0	0	0	0	0	0	0	0	0	0
P	1101	166.019	8.88373	C3H8N3OPS	165.012					0	0	0	0	10523.6	326147	0	0	0	0	0	0	282980	52191.2	0	0	0	43863	44630.7	0	0	0	0	0	0	0	10399.2	0	0	0	14435.7	11453.2	10202.5	0	0	0	8168.93	0	0	0
P	1547	166.021	9.32188	CH3N5O5	165.013					3839.25	0	0	0	0	6456.47	288863	0	0	0	194941	301446	0	52191.2	65397.5	0	0	0	44630.7	47085.2	0	0	0	0	0	0	0	0	0	0	0	0	0	22567.1	0	0	8168.93	0	0	26182.3
P	1927	166.022	8.92537	C2H7N5S2	165.014		Pyrimido[5,4-e]-1,2,4-triazine-5,7-diol	C5H3N5O2		0	0	0	0	0	0	0	319787	0	0	380844	0	0	0	0	0	0	0	0	0	0	0	0	0	0	0	0	0	0	0	0	0	0	0	0	0	0	0	0	0
P	2338	166.023	8.92538	H4N7O2P	165.016					0	0	0	0	0	0	0	0	355370	0	0	0	0	0	0	0	0	0	0	0	0	0	0	0	0	0	0	0	0	0	0	0	0	0	0	0	0	0	0	0
P	240	166.026	8.90884	C4H8NO4P	165.019					0	290916	313250	306880	372045	0	0	0	0	0	0	0	0	0	0	0	0	0	0	0	0	0	0	0	0	0	0	0	0	0	0	0	0	0	0	0	0	0	0	0
P	1006	166.027	8.88561	C5H4N5P	165.02					0	255317	0	0	6687.08	336943	0	0	0	0	0	0	304062	70816.1	0	0	0	116414	71315.2	0	0	0	0	0	0	0	20596.1	0	0	0	26254	29261.1	24520.7	0	0	0	16597.4	0	0	0
P	1475	166.029	9.33856	C11H3NO	165.021		Trimethylvinylammonium(1+); Bromide	C5H12BrN		10475.1	0	0	0	0	13278.4	295549	0	0	0	270470	342882	0	70816.1	71094	0	0	0	232934	118245	0	0	0	0	0	0	0	0	0	0	0	0	0	28959.2	0	0	16597.4	0	0	30981.4
P	1897	166.03	8.92838	C3H9N3OP2	165.023					0	0	0	0	0	0	0	347146	0	381662	367874	0	0	0	85337.5	0	0	0	0	0	129819	0	0	0	0	0	0	0	0	0	0	0	0	0	0	0	0	0	0	0
P	2315	166.031	8.91663	C2H8N5PS	165.024					0	0	0	0	0	0	0	0	334156	0	0	0	0	0	0	0	0	0	0	0	0	95769.9	91991.1	0	124910	0	0	0	0	0	0	0	0	0	0	0	0	0	0	0
P	238	166.034	8.91205	C4H7NO6	165.027					0	280753	332302	335645	345021	0	0	0	0	0	0	0	0	0	0	0	78156.7	0	0	0	0	0	0	0	0	0	0	0	0	0	0	0	0	0	0	0	0	0	0	0
P	1010	166.035	8.85872	C5H11NOS2	165.028	-2.9556				0	0	0	0	5611.2	309204	0	0	0	0	0	0	286578	67551.7	0	0	0	69661.3	66112.3	0	0	0	0	0	0	0	18280.2	0	0	0	33465.5	25167.7	25366.3	0	0	0	19975.8	0	0	0
P	1486	166.037	9.29494	C3H8N3O3P	165.03					3855.85	0	0	0	0	5084.52	314117	0	0	0	242178	283289	0	67551.7	60582.6	0	0	0	66112.3	67131.9	0	0	0	0	0	0	0	0	0	0	0	0	0	28008.8	0	0	19975.8	0	0	32731.2
P	1913	166.038	8.92536	C3H8N3O3P	165.031					0	0	0	0	0	0	0	296904	0	307705	261349	0	0	0	0	0	0	0	0	0	0	0	0	0	0	0	0	0	0	0	0	0	0	0	0	0	0	0	0	0
P	2330	166.04	8.92538	C10H3N3	165.033					0	0	0	0	0	0	0	0	277773	0	0	0	0	0	0	0	0	0	0	0	0	0	0	0	0	0	0	0	0	0	0	0	0	0	0	0	0	0	0	0
P	306	166.042	8.90884	C8H8NOP	165.035	-0.94357				0	169624	238793	231361	198966	0	0	0	0	0	0	0	0	0	0	0	0	0	0	0	0	0	0	0	0	0	0	0	0	0	0	0	0	0	0	0	0	0	0	0
P	1080	166.044	8.88513	C7H7N3S	165.036					0	0	0	0	7300.04	203556	0	0	0	0	0	0	172086	46278.2	0	0	0	47624	47579.7	0	0	0	0	0	0	0	16013.4	0	0	0	21270.8	19841.4	20649.3	0	0	0	14124.9	0	0	0
P	1559	166.045	9.3215	C5H12NOPS	165.038					4631.09	0	0	0	0	0	171286	0	0	0	153818	179187	0	46278.2	39799.9	0	0	0	47579.7	44450.4	0	0	0	0	0	0	0	0	0	0	0	0	0	14750.7	0	0	14124.9	0	0	23525.9
P	1999	166.046	8.92536	C4H11N3S2	165.039		2-Amino-3,4,5-trihydroxypentanoic acid	C5H11NO5		0	0	0	0	0	0	0	154665	0	157747	167982	0	0	0	0	0	0	0	0	0	0	0	0	0	0	0	0	0	0	0	0	0	0	0	0	0	0	0	0	0
P	2388	166.048	8.92538	C4H3N7O	165.041		2-Amino-3,4,5-trihydroxypentanoic acid; (2R,3R,4R)-form	C5H11NO5		0	0	0	0	0	0	0	0	151889	0	0	0	0	0	0	0	0	0	0	0	0	0	0	0	0	0	0	0	0	0	0	0	0	0	0	0	0	0	0	0
P	446	166.051	8.90884	CH7N7OS	165.043		2-Amino-3,4,5-trihydroxypentanoic acid; (2R,3S,4R)-form	C5H11NO5		0	94246.1	117691	112177	103782	0	0	0	0	0	0	0	0	0	0	0	0	0	0	0	0	0	0	0	0	0	0	0	0	0	0	0	0	0	0	0	0	0	0	0
P	1213	166.052	8.86289	C7H8N3P	165.045		Xylonic acid; D-form, Amide	C5H11NO5	Constituent of Polyoxin A, Polyoxin B, CKL00, CKL02, CKL04, CKL06, CKL07, CKL08 and Polyoxin N	0	0	0	0	2471.84	96145.6	0	0	0	0	0	0	89693.3	26619.2	0	0	0	29568.5	28435.4	0	0	0	0	0	0	0	11956.1	0	0	0	15418.5	14664.8	10085.8	0	0	0	6426.09	0	0	0
P	2130	166.055	8.92536	C5H13NOP2	165.047					0	0	0	0	0	0	0	85303.9	0	84495.6	85445.8	0	0	0	0	0	0	0	0	0	0	0	0	0	0	0	0	0	0	0	0	0	0	0	0	0	0	0	0	0
P	2474	166.056	8.92538	C4H12N3PS	165.049		Adenine; 6-N-Me, N1-oxide	C6H7N5O		0	0	0	0	0	0	0	0	77696.5	0	0	0	0	0	0	0	0	0	0	0	0	0	0	0	0	0	0	0	0	0	0	0	0	0	0	0	0	0	0	0
P	4007	166.067	10.5103	CH7N7O3	165.06		6-Amino-2-hydroxypurine; 6-N-Me	C6H7N5O	Isol. from the blue coral NIO-156 and from the bacterium Pseudomonas syringae	0	0	0	0	0	0	0	0	0	0	0	0	0	0	0	0	0	0	0	0	0	0	0	0	0	0	172795	0	70413.3	0	79870.8	69853.7	69677.7	0	0	0	0	0	0	0
P	4750	166.069	10.7859	C9H11NS	165.062		6-Amino-8-hydroxypurine; 7H-form, 7-Me	C6H7N5O		4405.59	0	0	0	0	3910.49	3756.75	0	0	0	0	3474.77	5664.73	6012.68	0	0	0	9237.99	4485.76	0	0	0	0	0	0	0	0	0	0	0	88089.9	0	0	99074.7	0	0	96916.6	0	0	0
P	4244	166.071	10.5214	C5H11NO5	165.064	-0.809974	1-Methylguanine	C6H7N5O	Isol. from RNA hydrolysates, e.g from yeast, Saccharomyces cerevisiae. Present in Chinese cabbage, Brassica chinensis, and other plants	0	0	0	0	0	0	0	0	0	0	0	0	0	0	0	0	0	0	0	0	0	0	0	0	0	0	0	118787	0	116148	0	0	0	0	0	112993	0	0	0	0
P	3604	166.072	10.5108	C6H7N5O	165.065	-1.07707	7-Methylguanine	C6H7N5O	Present in biol. systems, prob. as a dec. prod. of 7-Methylguanosine	0	0	0	0	0	0	0	0	0	0	0	0	0	0	0	0	0	0	0	0	0	0	0	0	0	161415	0	0	0	0	0	0	0	0	0	0	0	0	0	0
P	4827	166.074	10.8442	C4H12N3O2P	165.066					0	0	0	0	0	0	0	0	0	0	0	0	0	0	0	0	0	0	0	0	0	0	0	0	0	0	0	0	0	0	0	0	0	0	232757	0	0	81522.3	0	0
P	4461	166.075	10.8856	C3H11N5OS	165.068					0	0	0	0	0	0	0	0	0	0	0	0	0	0	0	0	0	0	0	0	0	0	0	0	0	0	0	0	73933.4	0	0	81583.2	83312.4	0	0	0	0	0	0	0
P	3893	166.076	10.5103	C3H11N5OS	165.068					0	0	0	0	0	0	0	0	0	0	0	0	0	0	0	0	0	0	0	0	0	0	0	0	0	0	273148	0	159037	0	265934	168621	162840	0	0	0	0	0	0	0
P	4974	166.076	10.6831	C3H11N5OS	165.069					0	6749.22	0	0	10770.2	2319.61	0	0	0	0	0	0	2483.85	2232.08	0	0	0	3810.19	0	0	0	0	0	0	0	0	166023	0	0	0	169900	0	157419	2743.74	0	0	95512.6	0	0	0
P	4737	166.077	10.7419	C9H12NP	165.07					5243.29	0	0	0	0	4676.86	2176.12	0	0	0	0	5690.77	9386.18	9147.48	0	0	0	7447.73	6120.77	0	0	0	0	0	0	0	0	0	0	0	169900	0	0	314027	0	0	183216	0	0	0
P	4286	166.079	10.8897	C9H12NP	165.071					0	0	0	0	0	0	0	0	0	0	0	0	0	0	0	0	0	0	0	0	0	0	0	0	0	0	0	94962.5	0	0	0	0	0	0	0	102998	0	0	0	97497.9
P	4177	166.079	10.5214	H7N9O2	165.072					0	0	0	0	0	0	0	0	0	0	0	0	0	0	0	0	0	0	0	0	0	0	0	0	0	0	0	190342	0	310098	0	0	0	0	0	193486	0	0	0	0
P	3702	166.08	10.8861	H7N9O2	165.073					0	0	0	0	0	0	0	0	0	0	0	0	0	0	0	0	0	0	0	0	0	0	0	0	0	92131.2	0	0	0	0	0	0	0	0	0	0	0	0	98748.4	0
P	3554	166.08	10.5108	H7N9O2	165.073		2-Acetyl-6-ethyl-3-hydroxypyridine	C9H11NO2	Constit. of Abelmoschus moschatus (ambrette) seeds	0	0	0	0	0	0	0	0	0	0	0	0	0	0	0	0	0	0	0	0	0	0	0	0	0	211550	0	0	0	0	0	0	0	0	0	0	0	0	0	0
P	4854	166.082	10.9037	C4H11N3O4	165.075		2-Acetyl-3-hydroxypyridine; Et ether	C9H11NO2		0	0	0	0	0	0	0	0	0	0	0	0	0	0	0	0	0	0	0	0	0	0	0	0	0	0	0	0	0	0	0	0	0	0	104318	0	0	107058	0	0
P	4816	166.082	10.5274	C4H11N3O4	165.075		2-Aminobenzoic acid; Et ester	C9H11NO2	Present in orange and grape	0	0	0	0	0	0	0	0	0	0	0	0	0	0	0	0	0	0	0	0	0	0	0	0	0	0	0	0	0	0	0	0	0	0	209801	0	0	0	0	0
P	4700	166.084	10.8982	C5H7N7	165.076		4-Aminobenzoic acid; Et ester	C9H11NO2	Constit. of the stems of Strychnos cathayensis	0	0	0	0	0	0	0	0	0	0	0	0	0	0	0	0	0	0	0	0	0	0	0	0	0	0	0	0	0	0	0	0	110945	0	0	0	0	0	0	0
P	3884	166.084	10.5103	C5H7N7	165.077		4-Aminobenzoic acid; N-Me, Me ester	C9H11NO2		0	0	0	0	0	0	0	0	0	0	0	0	0	0	0	0	0	0	0	0	0	0	0	0	0	0	298186	0	332513	0	292567	306339	210407	0	0	0	0	0	0	0
P	6418	166.084	8.81655	C5H7N7	165.077		2-Aminoethanol; N-Benzoyl	C9H11NO2	Isol. from ants, Tetramorium sp.	0	9770.24	0	0	14844.2	17070.3	0	0	0	0	0	0	12516.3	0	0	0	3254.32	7164.26	0	0	0	0	0	0	0	0	20574.3	0	14864.2	0	32249.1	27889	23243.1	0	0	0	26867.3	0	0	0
P	4970	166.085	10.7999	C3H12N5OP	165.078		2'-Amino-3'-hydroxyacetophenone; Me ether	C9H11NO2		0	0	0	0	0	5750.34	0	0	0	0	0	5965.03	6708.88	7601.13	0	0	0	5048.55	3979.26	0	0	0	0	0	0	0	0	0	0	0	183230	0	0	182487	0	0	89055.4	0	0	0
P	4738	166.085	10.7131	C3H12N5OP	165.078		2'-Amino-5'-hydroxyacetophenone; Me ether	C9H11NO2		4625.39	0	0	0	0	5091.59	6864.36	0	0	0	0	6568.38	9854.09	10890.2	0	0	0	4627.75	6382.32	0	0	0	0	0	0	0	0	0	0	0	183230	0	0	319576	0	0	188001	0	0	0
P	5897	166.087	8.83381	C9H11NO2	165.079	1.81659	2-Methoxyaniline; N-Ac	C9H11NO2	Prod. by Streptomyces sp. Ank 2	0	0	0	0	0	0	0	0	0	0	0	0	0	0	0	0	0	0	0	0	0	0	0	0	0	0	0	0	0	0	0	0	0	0	0	0	0	0	0	111012
P	4302	166.087	10.8897	C2H11N7S	165.08					0	0	0	0	0	0	0	0	0	0	0	0	0	0	0	0	0	0	0	0	0	0	0	0	0	0	0	102991	0	0	0	0	0	0	0	83126	0	0	0	95337
P	4188	166.087	10.5214	C2H11N7S	165.08					0	0	0	0	0	0	0	0	0	0	0	0	0	0	0	0	0	0	0	0	0	0	0	0	0	0	0	195005	0	272226	0	0	0	0	0	177574	0	0	0	0
P	3752	166.088	10.8861		165.081					0	0	0	0	0	0	0	0	0	0	0	0	0	0	0	0	0	0	0	0	0	0	0	0	0	80983.8	0	0	0	0	0	0	0	0	0	0	0	0	90241.7	0
P	3578	166.089	10.5108		165.081					0	0	0	0	0	0	0	0	0	0	0	0	0	0	0	0	0	0	0	0	0	0	0	0	0	182596	0	0	0	0	0	0	0	0	0	0	0	0	0	0
P	5514	166.089	8.84275	C6H15NO2S	165.082					0	0	0	0	0	0	0	0	0	0	0	0	0	0	0	0	0	0	0	0	0	0	0	0	0	0	0	0	0	0	0	0	0	0	0	0	0	0	128446	0
P	4874	166.09	10.9037	C6H15NO2S	165.083					0	0	0	0	0	0	0	0	0	0	0	0	0	0	0	0	0	0	0	0	0	0	0	0	0	0	0	0	0	0	0	0	0	0	71443	0	0	86247.4	0	0
P	5119	166.09	8.83925	C6H17NP2	165.083		Benzylcarbamic acid; Hydrazide	C8H11N3O		0	0	0	0	0	0	0	0	0	0	0	0	0	0	0	0	0	0	0	0	0	0	0	0	0	0	0	0	0	0	0	0	0	0	0	0	0	152709	0	0
P	4823	166.09	10.5274	C6H17NP2	165.083					0	0	0	0	0	0	0	0	0	0	0	0	0	0	0	0	0	0	0	0	0	0	0	0	0	0	0	0	0	0	0	0	0	0	159163	0	0	0	0	0
P	4475	166.092	10.8857	C6H17NP2	165.084					0	0	0	0	0	0	0	0	0	0	0	0	0	0	0	0	0	0	0	0	0	0	0	0	0	0	0	0	73211.7	0	0	91693	0	0	0	0	0	0	0	0
P	6194	166.092	8.83694		165.085					0	0	0	0	0	0	0	0	0	0	0	0	0	0	0	0	0	0	0	0	0	0	0	0	0	0	0	0	0	0	0	0	0	0	0	0	0	0	0	0
P	3923	166.092	10.5103		165.085					0	0	0	0	0	0	0	0	0	0	0	0	0	0	0	0	0	0	0	0	0	0	0	0	0	0	237500	0	158314	0	138923	175014	249377	0	0	0	0	0	0	0
P	5788	166.095	8.84214		165.087					0	0	0	0	0	0	0	0	0	0	0	0	0	0	0	0	0	0	0	0	0	0	0	0	0	0	0	0	0	0	0	0	0	0	0	0	0	0	0	206881
P	4240	166.095	10.5214	C2H12N7P	165.088					0	0	0	0	0	0	0	0	0	0	0	0	0	0	0	0	0	0	0	0	0	0	0	0	0	0	0	132955	0	126336	0	0	0	0	0	115417	0	0	0	0
P	3653	166.097	10.5108	C2H12N7P	165.09					0	0	0	0	0	0	0	0	0	0	0	0	0	0	0	0	0	0	0	0	0	0	0	0	0	127002	0	0	0	0	0	0	0	0	0	0	0	0	0	0
P	5435	166.097	8.84275	C8H11N3O	165.09	-2.12701				0	0	0	0	0	0	0	0	0	0	0	0	0	0	0	0	0	0	0	0	0	0	0	0	0	0	0	0	0	0	0	0	0	0	0	0	0	0	219163	0
P	5058	166.098	8.83925	C6H16NO2P	165.091					0	0	0	0	0	0	0	0	0	0	0	0	0	0	0	0	0	0	0	0	0	0	0	0	0	0	0	0	0	0	0	0	0	0	0	0	0	237385	0	0
P	4853	166.099	10.5274	C6H16NO2P	165.091					0	0	0	0	0	0	0	0	0	0	0	0	0	0	0	0	0	0	0	0	0	0	0	0	0	0	0	0	0	0	0	0	0	0	96907.9	0	0	0	0	0
P	6161	166.1	8.83694	C5H15N3OS	165.093					0	0	0	0	0	0	0	0	0	0	0	0	0	0	0	0	0	0	0	0	0	0	0	0	0	0	0	0	0	0	0	0	0	0	0	0	0	0	0	0
P	4004	166.1	10.5103	C5H15N3OS	165.093					0	0	0	0	0	0	0	0	0	0	0	0	0	0	0	0	0	0	0	0	0	0	0	0	0	0	100956	0	102963	0	153369	171141	91810.3	0	0	0	0	0	0	0
P	4774	166.102	10.7601	C5H15N3OS	165.095					2833.32	0	0	0	0	4009.31	6463.55	0	0	0	0	2698.37	4942.36	5790.95	0	0	0	4732.74	3338.53	0	0	0	0	0	0	0	0	0	0	0	91794.7	0	0	76744.9	0	0	76059.9	0	0	0
P	5773	166.103	8.84214		165.096					0	0	0	0	0	0	0	0	0	0	0	0	0	0	0	0	0	0	0	0	0	0	0	0	0	0	0	0	0	0	0	0	0	0	0	0	0	0	0	248960
P	4326	166.104	10.5102		165.096					0	0	0	0	0	0	0	0	0	0	0	0	0	0	0	0	0	0	0	0	0	0	0	0	0	0	0	82938.5	0	174254	0	0	0	0	0	0	0	0	0	0
P	5431	166.105	8.84275	C2H11N7O2	165.098					0	0	0	0	0	0	0	0	0	0	0	0	0	0	0	0	0	0	0	0	0	0	0	0	0	0	0	0	0	0	0	0	0	0	0	0	0	0	239360	0
P	5062	166.107	8.83925	C6H15NO4	165.099		2-Aminobenzyl alcohol; N,N-Di-Me, Me ether	C10H15NO		0	0	0	0	0	0	0	0	0	0	0	0	0	0	0	0	0	0	0	0	0	0	0	0	0	0	0	0	0	0	0	0	0	0	0	0	0	232193	0	0
P	6181	166.108	8.83694	C7H11N5	165.101		4-Aminophenol; Butyl ether	C10H15NO		0	0	0	0	0	0	0	0	0	0	0	0	0	0	0	0	0	0	0	0	0	0	0	0	0	0	0	0	0	0	0	0	0	0	0	0	0	0	0	0
P	5795	166.111	8.84214	C5H16N3OP	165.104		2-Amino-1-phenylethanol; (±)-form, N,N-Di-Me	C10H15NO	Isol. from leaves of Aptenia cordifolia, as partial racemate of low opt. rotn.	0	0	0	0	0	0	0	0	0	0	0	0	0	0	0	0	0	0	0	0	0	0	0	0	0	0	0	0	0	0	0	0	0	0	0	0	0	0	0	188801
P	5465	166.114	8.84275		165.106		2-(4-Aminophenyl)ethanol; N,N-Di-Me	C10H15NO		0	0	0	0	0	0	0	0	0	0	0	0	0	0	0	0	0	0	0	0	0	0	0	0	0	0	0	0	0	0	0	0	0	0	0	0	0	0	169846	0
P	5102	166.115	8.83925		165.108		2-Amino-3-phenyl-1-propanol; (R)-form, Me ether	C10H15NO		0	0	0	0	0	0	0	0	0	0	0	0	0	0	0	0	0	0	0	0	0	0	0	0	0	0	0	0	0	0	0	0	0	0	0	0	0	155184	0	0
P	6249	166.117	8.83694	CH11N9O	165.109		2-Amino-3-phenyl-1-propanol; (±)-form, Me ether	C10H15NO		0	0	0	0	0	0	0	0	0	0	0	0	0	0	0	0	0	0	0	0	0	0	0	0	0	0	0	0	0	0	0	0	0	0	0	0	0	0	0	0
P	5853	166.119	8.84214	C5H15N3O3	165.112		2-Amino-1-propanol; (R)-form, N-Benzyl	C10H15NO		0	0	0	0	0	0	0	0	0	0	0	0	0	0	0	0	0	0	0	0	0	0	0	0	0	0	0	0	0	0	0	0	0	0	0	0	0	0	0	118231
P	5542	166.122	8.84275	C4H16N5P	165.114		4-(2-Aminopropyl)phenol; (±)-form, Me ether	C10H15NO	Alkaloid from Acacia rigidula	0	0	0	0	0	0	0	0	0	0	0	0	0	0	0	0	0	0	0	0	0	0	0	0	0	0	0	0	0	0	0	0	0	0	0	0	0	0	106748	0
P	5201	166.123	8.83925	C10H15NO	165.116	2.71931	Lindenialine	C10H15NO	Alkaloid from the leaves of Lindenia austro-caledonica (Rubiaceae)	0	0	0	0	0	0	0	0	0	0	0	0	0	0	0	0	0	0	0	0	0	0	0	0	0	0	0	0	0	0	0	0	0	0	0	0	0	99789.2	0	0
P	6383	166.125	8.83694		165.117		6-Deoxyaltritol; D-form	C6H14O5	Present in cell-wall polysaccharides of Nocardia asteroides R399	0	0	0	0	0	0	0	0	0	0	0	0	0	0	0	0	0	0	0	0	0	0	0	0	0	0	0	0	0	0	0	0	0	0	0	0	0	0	0	0
P	6023	166.128	8.84153	H11N11	165.12		Rhamnitol	C6H14O5	Isol. from the hydrosylates of Levan	0	0	0	0	0	0	0	0	0	0	0	0	0	0	0	0	0	0	0	0	0	0	0	0	0	0	0	0	0	0	0	0	0	0	0	0	0	0	0	96455.8
P	4223	167.09	9.21489		166.083		Rhamnitol; D-form	C6H14O5		0	0	0	0	0	0	0	0	0	0	0	0	0	0	0	0	0	0	0	0	0	0	0	0	0	0	0	183849	0	163402	0	0	0	0	0	110875	0	0	0	0
P	3568	167.091	9.23198	C6H14O5	166.084	-0.621244				0	0	0	0	0	0	0	0	0	0	0	0	0	0	0	0	0	0	0	0	0	0	0	0	0	203534	0	0	0	0	0	0	0	0	0	0	0	0	109168	0
P	4812	167.093	9.24014	C7H10N4O	166.085					0	0	0	0	0	0	0	0	0	0	0	0	0	0	0	0	0	0	0	0	0	0	0	0	0	0	0	0	0	0	0	0	0	0	238581	0	0	198234	0	0
P	3812	167.095	9.22189	C5H15N2O2P	166.087		β-Acaridial	C10H14O2	Sex pheromone or alarm pheromone of mites Caloglyphus polyphyllae, Tyrophagus longior and Tyrophagus putrescentiae	0	0	0	0	0	0	0	0	0	0	0	0	0	0	0	0	0	0	0	0	0	0	0	0	0	0	583831	0	398790	0	565631	442471	472305	0	0	0	0	0	0	0
P	4726	167.097	9.64267	C4H14N4OS	166.089		Acetophenone; Di-Me acetal	C10H14O2		5134.19	0	0	0	0	15600.6	18262.9	0	0	0	10052.4	7753.53	0	15183.4	0	0	0	0	19209.4	37195.2	0	0	0	0	0	0	0	0	0	0	0	0	0	604992	0	0	518491	0	0	490297
P	4096	167.098	9.21489	C10H15P	166.091		Actinidialactone; 4-Epimer	C10H14O2	Constit. of Actinidia polygama	0	0	0	0	0	0	0	0	0	0	0	0	0	0	0	0	0	0	0	0	0	0	0	0	0	0	0	939993	0	815294	0	0	0	0	0	759759	0	0	0	0
P	3465	167.1	9.23198	CH10N8O2	166.092		1,2-Benzenediol; Mono-tert-butyl ether	C10H14O2		0	0	0	0	0	0	0	0	0	0	0	0	0	0	0	0	0	0	0	0	0	0	0	0	0	1.03536e+06	0	0	0	0	0	0	0	0	0	0	0	0	653873	0
P	4789	167.101	9.24014	C7H19PS	166.094		1,4-Benzenediol; Monobutyl ether	C10H14O2	Prod. by a marine-derived Bacillus amyloliquefaciens SCSIO 00856	0	0	0	0	0	0	0	0	0	0	0	0	0	0	0	0	0	0	0	0	0	0	0	0	0	0	0	0	0	0	0	0	0	0	1.07295e+06	0	0	891809	0	0
P	3783	167.103	9.22189	C5H14N2O4	166.096		5-Butyl-6-methyl-2H-pyran-2-one	C10H14O2	Prod. by fungal culture LL-11G219	0	0	0	0	0	0	0	0	0	0	0	0	0	0	0	0	0	0	0	0	0	0	0	0	0	0	1.57595e+06	0	1.49805e+06	0	1.67499e+06	1.39038e+06	1.34817e+06	0	0	0	0	0	0	0
P	4723	167.105	9.65379	C4H15N4OP	166.098		3-Caren-10-oic acid; (-)-form	C10H14O2		4121.32	0	0	0	0	38776.2	42573.7	0	0	0	4051.88	38914.6	0	56652.2	0	0	0	0	59103.2	64085	0	0	0	0	0	0	0	0	0	0	0	0	0	1.66817e+06	0	0	1.5573e+06	0	0	1.45081e+06
P	6048	167.105	8.37452	C4H15N4OP	166.098		4-Caren-10-oic acid	C10H14O2	Constit. of Chamaecyparis nootkatensis. Also in Juniperus depressa and Juniperus oblonga	0	0	0	0	0	0	0	0	0	0	0	0	0	0	0	0	0	0	0	0	0	0	0	0	0	0	0	0	0	0	0	0	0	0	0	0	0	0	0	139422
P	4080	167.106	9.21489	C10H14O2	166.099	-2.05291	2,4,7-Decatrienoic acid; (2E,4Z,7Z)-form	C10H14O2	Prod. by Streptomyces viridochromogenes	0	0	0	0	0	0	0	0	0	0	0	0	0	0	0	0	0	0	0	0	0	0	0	0	0	0	0	1.9065e+06	0	1.83673e+06	0	0	0	0	0	1.86451e+06	0	0	0	0
P	3455	167.107	9.22655	C3H14N6S	166.1					0	0	0	0	0	0	0	0	0	0	0	0	0	0	0	0	0	0	0	0	0	0	0	0	0	2.03932e+06	0	0	0	0	0	0	0	0	0	0	0	0	1.47929e+06	0
P	5698	167.108	8.38407	C3H14N6S	166.1					0	0	0	0	0	0	0	0	0	0	0	0	0	0	0	0	0	0	0	0	0	0	0	0	0	0	0	0	0	0	0	0	0	0	0	0	0	0	155392	0
P	5318	167.109	8.36734		166.102					0	0	0	0	0	0	0	0	0	0	0	0	0	0	0	0	0	0	0	0	0	0	0	0	0	0	0	0	0	0	0	0	0	0	0	0	0	136694	0	0
P	4785	167.109	9.24291		166.102					0	0	0	0	0	0	0	0	0	0	0	0	0	0	0	0	0	0	0	0	0	0	0	0	0	0	0	0	0	0	0	0	0	0	2.06597e+06	0	0	1.75989e+06	0	0
P	6545	167.11	11.6168	C7H18O2S	166.102					0	0	0	0	0	0	0	0	0	0	0	0	0	0	0	0	0	0	0	0	0	0	0	0	0	0	0	0	0	0	0	0	0	0	0	0	0	0	0	0
P	6514	167.11	8.37537	C7H18O2S	166.103					0	0	0	0	0	0	0	0	0	0	0	0	0	0	0	0	0	0	0	0	0	0	0	0	0	0	0	0	0	0	0	0	0	0	0	0	0	0	0	0
P	6669	167.111	11.611	H10N10O	166.104					0	0	0	0	0	0	0	0	0	0	0	0	0	0	0	0	0	0	0	0	0	0	0	0	0	0	0	0	0	0	0	0	0	0	0	0	0	0	0	0
P	3778	167.111	9.22189	H10N10O	166.104		3-Isopropyl-2-methoxy-5-methylpyrazine	C9H14N2O	Constit. of Galbanum oil	0	0	0	0	0	0	0	0	0	0	0	0	0	0	0	0	0	0	0	0	0	0	0	0	0	0	2.33738e+06	0	2.40791e+06	0	2.37159e+06	2.31504e+06	2.1448e+06	0	0	0	0	0	0	0
P	4721	167.113	9.67463	C4H14N4O3	166.106		2-Methoxy-3-(1-methylpropyl)pyrazine	C9H14N2O	Volatile component of many vegetables, e.g. asparagus, carrot, celery, cucumber, parsnip, bell peppers, Pisum sativum (pea). Found in galbanum and petitgrain oils and ginger. Prod. by Chondromyces crocatus and a marine Streptomyces sp. GWS-BW-H5	1485.05	0	0	0	0	57243.1	60372.4	0	0	0	9039.26	27605.8	0	77542	0	0	0	0	71989.6	77459.3	0	0	0	0	0	0	0	0	0	0	0	0	0	2.26427e+06	0	0	2.26779e+06	0	0	1.87224e+06
P	4077	167.115	9.21489	C4H14N4O3	166.107		2-Methoxy-3-(2-methylpropyl)pyrazine	C9H14N2O	Occurs in petitgrain and galbanum oils. Potent component of Capsicum annuum. Found in human urine	0	0	0	0	0	0	0	0	0	0	0	0	0	0	0	0	0	0	0	0	0	0	0	0	0	0	0	2.29617e+06	0	2.30916e+06	0	0	0	0	0	2.32823e+06	0	0	0	0
P	5588	167.116	8.38407	C3H15N6P	166.109					0	0	0	0	0	0	0	0	0	0	0	0	0	0	0	0	0	0	0	0	0	0	0	0	0	0	0	0	0	0	0	0	0	0	0	0	0	0	321361	0
P	3454	167.116	9.23198	C3H15N6P	166.109					0	0	0	0	0	0	0	0	0	0	0	0	0	0	0	0	0	0	0	0	0	0	0	0	0	2.19983e+06	0	0	0	0	0	0	0	0	0	0	0	0	1.98797e+06	0
P	5341	167.117	11.6057	C3H15N6P	166.11					0	0	0	0	0	0	0	0	0	0	0	0	0	0	0	0	0	0	0	0	0	0	0	0	0	0	0	0	0	0	0	0	0	0	0	0	0	222667	0	0
P	5241	167.117	8.38382	C3H15N6P	166.11					0	0	0	0	0	0	0	0	0	0	0	0	0	0	0	0	0	0	0	0	0	0	0	0	0	0	0	0	0	0	0	0	0	0	0	0	0	455097	0	0
P	4784	167.117	9.24292	C3H15N6P	166.11					0	0	0	0	0	0	0	0	0	0	0	0	0	0	0	0	0	0	0	0	0	0	0	0	0	0	0	0	0	0	0	0	0	0	2.10133e+06	0	0	1.89021e+06	0	0
P	6547	167.118	11.6194	C9H14N2O	166.111	1.60636				0	0	0	0	0	0	0	0	0	0	0	0	0	0	0	0	0	0	0	0	0	0	0	0	0	0	0	0	0	0	0	0	0	0	0	0	0	0	0	0
P	6344	167.119	8.37546	C7H19O2P	166.112					0	0	0	0	0	0	0	0	0	0	0	0	0	0	0	0	0	0	0	0	0	0	0	0	0	0	0	0	0	0	0	0	0	0	0	0	0	0	0	0
P	3781	167.119	9.22189	C7H19O2P	166.112					0	0	0	0	0	0	0	0	0	0	0	0	0	0	0	0	0	0	0	0	0	0	0	0	0	0	1.9862e+06	0	2.19657e+06	0	1.99363e+06	2.13882e+06	1.95045e+06	0	0	0	0	0	0	0
P	4722	167.121	9.64823	C6H18N2OS	166.114					4555.7	0	0	0	0	49324.7	48885.6	0	0	0	30051.8	49825.3	0	68340.7	0	0	0	0	65473.1	67717.8	0	0	0	0	0	0	0	0	0	0	0	0	0	1.85849e+06	0	0	2.08096e+06	0	0	1.65942e+06
P	6715	167.122	8.37573	C6H18N2OS	166.115					0	0	0	0	0	0	0	0	0	0	0	0	0	0	0	0	0	0	0	0	0	0	0	0	0	0	0	0	0	0	0	0	0	0	0	0	0	0	0	0
P	4082	167.123	9.21489		166.116					0	0	0	0	0	0	0	0	0	0	0	0	0	0	0	0	0	0	0	0	0	0	0	0	0	0	0	1.73108e+06	0	1.60183e+06	0	0	0	0	0	1.81597e+06	0	0	0	0
P	5714	167.124	8.37595		166.117					0	0	0	0	0	0	0	0	0	0	0	0	0	0	0	0	0	0	0	0	0	0	0	0	0	0	0	0	0	0	0	0	0	0	0	0	0	0	268829	0
P	3457	167.124	9.23198	C3H14N6O2	166.117					0	0	0	0	0	0	0	0	0	0	0	0	0	0	0	0	0	0	0	0	0	0	0	0	0	1.56928e+06	0	0	0	0	0	0	0	0	0	0	0	0	1.44421e+06	0
P	4786	167.126	9.24292	C3H14N6O2	166.118					0	0	0	0	0	0	0	0	0	0	0	0	0	0	0	0	0	0	0	0	0	0	0	0	0	0	0	0	0	0	0	0	0	0	1.51438e+06	0	0	1.37465e+06	0	0
P	3788	167.128	9.22189	C7H18O4	166.12					0	0	0	0	0	0	0	0	0	0	0	0	0	0	0	0	0	0	0	0	0	0	0	0	0	0	1.26074e+06	0	1.32308e+06	0	1.25346e+06	1.44652e+06	1.27914e+06	0	0	0	0	0	0	0
P	4724	167.13	9.64962	C8H14N4	166.122					7218.52	0	0	0	0	33537	35801.6	0	0	0	19749.5	14220.7	0	46397.9	0	0	0	0	45791.6	44540	0	0	0	0	0	0	0	0	0	0	0	0	0	1.25271e+06	0	0	1.32244e+06	0	0	1.04777e+06
P	4091	167.131	9.21489	C6H19N2OP	166.124					0	0	0	0	0	0	0	0	0	0	0	0	0	0	0	0	0	0	0	0	0	0	0	0	0	0	0	1.0464e+06	0	1.13438e+06	0	0	0	0	0	1.18161e+06	0	0	0	0
P	3466	167.132	9.23198	C5H18N4S	166.125					0	0	0	0	0	0	0	0	0	0	0	0	0	0	0	0	0	0	0	0	0	0	0	0	0	958178	0	0	0	0	0	0	0	0	0	0	0	0	904824	0
P	4792	167.134	9.24014		166.127					0	0	0	0	0	0	0	0	0	0	0	0	0	0	0	0	0	0	0	0	0	0	0	0	0	0	0	0	0	0	0	0	0	0	1.13945e+06	0	0	870560	0	0
P	3795	167.136	9.22189	C2H14N8O	166.129					0	0	0	0	0	0	0	0	0	0	0	0	0	0	0	0	0	0	0	0	0	0	0	0	0	0	799842	0	854406	0	866012	853836	883247	0	0	0	0	0	0	0
P	4725	167.138	9.64684		166.131					18500	0	0	0	0	24252.8	24441.7	0	0	0	13148.9	10341.9	0	19232.8	0	0	0	0	29224.9	24102.6	0	0	0	0	0	0	0	0	0	0	0	0	0	962118	0	0	844919	0	0	616321
P	4100	167.139	9.21489	C6H18N2O3	166.132					0	0	0	0	0	0	0	0	0	0	0	0	0	0	0	0	0	0	0	0	0	0	0	0	0	0	0	859477	0	756716	0	0	0	0	0	760833	0	0	0	0
P	3482	167.141	9.23198		166.133		5-Isopropyl-2-(2-methylpropyl)-1H-imidazole	C10H18N2	Isol. from the Chinese remedy Qiung laug prepd. from the beetle Catharsius molossus	0	0	0	0	0	0	0	0	0	0	0	0	0	0	0	0	0	0	0	0	0	0	0	0	0	648213	0	0	0	0	0	0	0	0	0	0	0	0	612423	0
P	4798	167.142	9.24014	C5H19N4P	166.135					0	0	0	0	0	0	0	0	0	0	0	0	0	0	0	0	0	0	0	0	0	0	0	0	0	0	0	0	0	0	0	0	0	0	646921	0	0	615461	0	0
P	3826	167.144	9.22189		166.137					0	0	0	0	0	0	0	0	0	0	0	0	0	0	0	0	0	0	0	0	0	0	0	0	0	0	521568	0	608429	0	615591	679618	694418	0	0	0	0	0	0	0
P	4147	167.148	9.21489	CH14N10	166.14					0	0	0	0	0	0	0	0	0	0	0	0	0	0	0	0	0	0	0	0	0	0	0	0	0	0	0	488482	0	476317	0	0	0	0	0	435290	0	0	0	0
P	3538	167.149	9.23198		166.142					0	0	0	0	0	0	0	0	0	0	0	0	0	0	0	0	0	0	0	0	0	0	0	0	0	420697	0	0	0	0	0	0	0	0	0	0	0	0	356536	0
P	4818	167.15	9.24292	C5H18N4O2	166.143					0	0	0	0	0	0	0	0	0	0	0	0	0	0	0	0	0	0	0	0	0	0	0	0	0	0	0	0	0	0	0	0	0	0	334646	0	0	243726	0	0
P	6498	167.152	9.24272		166.144					0	0	0	0	0	0	0	0	0	0	0	0	0	0	0	0	0	0	0	0	0	0	0	0	0	0	0	0	0	0	0	0	0	0	0	0	0	0	0	0
P	3912	167.153	9.18517		166.145		2-Aminobenzenethiol; N-Ac	C8H9NOS		0	9210.55	0	0	3917.41	15099.5	0	0	0	0	0	0	9063	13506.4	0	0	0	6311.11	0	0	0	0	0	0	0	0	271127	0	361177	0	335613	348729	353957	0	0	0	233620	0	0	0
P	4746	167.155	9.23697	C10H18N2	166.147	2.12391				0	0	0	0	0	0	0	0	0	0	0	0	0	0	0	0	0	0	0	0	0	0	0	0	0	0	0	0	0	0	0	0	0	261660	0	0	0	0	0	182797
P	4257	167.156	9.21489		166.149		6-Amino-2,8-dihydroxypurine	C5H5N5O2	Prod. by Alcaligenes aquamarinus. Found in urine of humans with 2,8-dihydroxyadenine urolithiasis associated with adenine phosphoribosyltransferase deficiency	0	0	0	0	0	0	0	0	0	0	0	0	0	0	0	0	0	0	0	0	0	0	0	0	0	0	0	243969	0	253465	0	0	0	0	0	156254	0	0	0	0
P	3672	167.157	9.22655		166.15		4-Amino-3,6-dihydroxy-1H-pyrazolo[3,4-d]pyrimidine	C5H5N5O2	Prod. by the marine Agrobacterium aurantiacum	0	0	0	0	0	0	0	0	0	0	0	0	0	0	0	0	0	0	0	0	0	0	0	0	0	196485	0	0	0	0	0	0	0	0	0	0	0	0	118415	0
P	4872	167.159	9.22638		166.151		Guanine; N7-Oxide	C5H5N5O2	Isol. from culture broths of Streptomyces spp.	0	0	0	0	0	0	0	0	0	0	0	0	0	0	0	0	0	0	0	0	0	0	0	0	0	0	0	0	0	0	0	0	0	0	112905	0	0	0	0	0
P	4467	167.16	9.20928		166.153					0	0	0	0	0	0	0	0	0	0	0	0	0	0	0	0	0	0	0	0	0	0	0	0	0	0	0	0	262013	0	0	127438	0	0	0	0	0	0	0	0
P	2181	168.046	11.3113	C2H10N5PS	167.039					0	0	0	0	0	0	0	74097.3	0	0	0	0	0	0	0	0	0	0	0	0	0	0	0	0	0	0	0	0	0	0	0	0	0	0	0	0	0	0	0	0
P	2507	168.047	11.3105	H5N7O4	167.04	-2.92666				0	0	0	0	0	0	0	0	70408.3	0	0	0	0	0	0	0	0	0	0	0	0	0	0	0	0	0	0	0	0	0	0	0	0	0	0	0	0	0	0	0
P	378	168.05	11.3003	C4H9NO6	167.043					0	143487	137713	141734	150025	0	0	0	0	0	0	0	0	0	0	0	0	0	0	0	0	0	0	77081.7	0	0	0	0	0	0	0	0	0	0	0	0	0	0	0	0
P	1148	168.051	11.0193	C5H5N5O2	167.044	-0.976715	Zapotidine	C7H9N3S	Minor alkaloid from the seeds of Casimiroa edulis (Mexican apple) (Rutaceae)	0	0	0	0	4388.26	160711	0	0	0	0	0	0	137262	98653	0	0	0	67842.7	79779.6	0	0	0	0	0	0	0	36076.7	0	0	0	40369.8	0	0	52683.5	0	0	43687.2	0	0	0
P	1583	168.053	11.3102	C3H10N3O3P	167.046					0	0	0	0	0	0	175776	0	0	0	159342	159545	0	0	0	0	0	0	73876.4	83996.6	0	0	0	0	0	0	0	0	0	0	0	0	0	0	0	0	0	0	0	0
P	1973	168.054	11.3142	C3H10N3O3P	167.047					0	0	0	0	0	0	0	182778	0	166566	0	0	0	0	106411	0	0	0	0	0	85636.5	0	0	0	0	0	0	0	0	0	0	0	0	0	0	0	0	0	0	0
P	2368	168.055	11.3057	C10H5N3	167.048		2-Amino-1,4-benzenediol; N-Ac	C8H9NO3	Isol. from Actinoplanes sp. cultures	0	0	0	0	0	0	0	0	183222	0	0	0	0	0	0	0	0	0	0	0	0	96961.1	92572.7	0	98301.8	0	0	0	0	0	0	0	0	0	0	0	0	0	0	0
P	2955	168.057	11.3176	C8H10NOP	167.05		3-(1-Aminoethylidene)-6-methyl-2H-pyran-2,4(3H)-dione	C8H9NO3	Prod. by Fusarium incarnatum HKI0504	0	0	0	0	0	0	0	0	0	0	0	0	0	0	0	116491	0	0	0	0	0	0	0	111109	0	0	0	0	0	0	0	0	0	0	0	0	0	0	0	0
P	285	168.058	11.3004	C7H9N3S	167.051		2-Amino-4-hydroxybenzoic acid; Me ester	C8H9NO3		0	353469	333093	273099	250807	0	0	0	0	0	0	0	0	0	0	0	124443	0	0	0	0	0	0	0	0	0	0	0	0	0	0	0	0	0	0	0	0	0	0	0
P	2585	168.059	11.0449	C7H9N3S	167.052	1.83712	2-Amino-5-hydroxybenzoic acid; Me ester	C8H9NO3		0	206570	0	0	10417	214530	0	0	0	0	0	0	247213	126763	0	0	0	121017	0	0	0	0	0	0	0	0	50245.3	0	0	0	54150.8	0	7122.66	2710.97	0	0	62955.6	0	0	0
P	1062	168.061	11.488	C5H14NOPS	167.054		3-Amino-4-hydroxybenzoic acid; Me ester	C8H9NO3		5341.45	0	0	0	0	285913	248283	0	0	0	0	320234	0	231653	0	0	0	0	121169	126319	0	0	0	0	0	0	0	0	0	0	0	0	0	67446.1	0	0	62955.6	0	0	39682.9
P	1938	168.062	11.3127	C4H13N3S2	167.055		3-Amino-5-hydroxybenzoic acid; Me ester	C8H9NO3		0	0	0	0	0	0	0	240027	0	278294	238385	0	0	0	146301	0	0	0	0	131829	128990	0	0	0	0	0	0	0	0	0	0	0	0	0	0	0	0	0	0	0
P	2343	168.064	11.3057	C4H5N7O	167.056		2-Amino-3-hydroxy-4-methylbenzoic acid	C8H9NO3	Intermed. in actinomycin biosynth. by Streptomyces antibioticus	0	0	0	0	0	0	0	0	253021	0	0	0	0	0	0	0	0	0	0	0	0	133139	121009	0	114370	0	0	0	0	0	0	0	0	0	0	0	0	0	0	0
P	2950	168.065	11.3176	C8H9NO3	167.058	-0.133175	2,4-Dihydroxybenzoic acid; 4-Me ether, amide	C8H9NO3	Prod. by Streptomyces sp. DGC1	0	0	0	0	0	0	0	0	0	0	0	0	0	0	0	133443	0	0	0	0	0	0	0	109627	0	0	0	0	0	0	0	0	0	0	0	0	0	0	0	0
P	311	168.067	11.3004	CH9N7OS	167.059		(2-Trimethylammonioethyl)phosphonic acid betaine	C5H14NO3P	Constit. of the sea anemone Anthopleura xanthogrammica	0	223004	227291	263069	224918	0	0	0	0	0	0	0	0	0	0	0	152415	0	0	0	0	0	0	0	0	0	0	0	0	0	0	0	0	0	0	0	0	0	0	0
P	2586	168.068	11.0462	C7H10N3P	167.06					0	196534	0	0	5447.9	194944	0	0	0	0	0	0	199049	111486	0	0	0	135516	0	0	0	0	0	0	0	0	47598.6	0	0	0	52057.6	0	3185.18	5451.12	0	0	46791.8	0	0	0
P	1085	168.069	11.488	C5H13NO3S	167.062	1.08013	9H-Carbazole	C12H9N	Alkaloid from the root bark of Glycosmis pentaphylla (Rutaceae). Co-product in manuf. of Anthracene from coal tar	10082.9	0	0	0	0	241396	203111	0	0	0	0	234048	0	128436	0	0	0	0	154738	110301	0	0	0	0	0	0	0	0	0	0	0	0	0	58756.6	0	0	46791.8	0	0	27806.1
P	2001	168.07	11.3127	C5H15NOP2	167.063					0	0	0	0	0	0	0	174922	0	171506	188635	0	0	0	101640	0	0	0	0	134723	135480	0	0	0	0	0	0	0	0	0	0	0	0	0	0	0	0	0	0	0
P	2383	168.072	11.3057	C4H14N3PS	167.065					0	0	0	0	0	0	0	0	186327	0	0	0	0	0	0	0	0	0	0	0	0	116963	123341	0	102899	0	0	0	0	0	0	0	0	0	0	0	0	0	0	0
P	2998	168.074	11.3093	C3H5N9	167.066					0	0	0	0	0	0	0	0	0	0	0	0	0	0	0	88842.1	0	0	0	0	0	0	0	0	0	0	0	0	0	0	0	0	0	0	0	0	0	0	0	0
P	412	168.075	11.298	C3H5N9	167.068		α-Amino-1,4-cyclohexadiene-1-propanoic acid; (S)-form	C9H13NO2	Metab. of Streptomyces diastatochromogenes, Streptomyces arenae, Streptomyces lemensis, other Streptomyces spp. and a Pseudomonas sp.	0	197044	170181	202832	158992	0	0	0	0	0	0	0	0	0	0	0	0	0	0	0	0	0	0	0	0	0	0	0	0	0	0	0	0	0	0	0	0	0	0	0
P	2588	168.076	11.0269	CH10N7OP	167.068		α-Amino-1,4-cyclohexadiene-1-propanoic acid; (±)-form	C9H13NO2		0	124143	0	0	11248.4	132193	0	0	0	0	0	0	140524	73312.6	0	0	0	72394.7	0	0	0	0	0	0	0	0	31096.4	0	0	0	31785.8	0	9264.84	0	0	0	27892.9	0	0	0
P	2120	168.079	11.3102	C5H14NO3P	167.071	2.14441	3-Amino-5-hydroxy-5-vinyl-2-cyclopenten-1-one; (R)-form, N,N-Di-Me	C9H13NO2	Isol. from Trichoderma koningii	0	0	0	0	0	0	0	108286	0	113072	131823	0	0	0	0	0	0	0	0	0	0	0	0	0	0	0	0	0	0	0	0	0	0	0	0	0	0	0	0	0
P	2454	168.08	11.3105	C4H13N3O2S	167.073	-2.94171	2-(3,4-Dimethyl-1H-pyrrol-1-yl)propanoic acid; (S)-form	C9H13NO2	Constit. of mixed purees of onion and garlic (Allium cepa and Allium sativum)	0	0	0	0	0	0	0	0	131477	0	0	0	0	0	0	0	0	0	0	0	0	0	0	0	0	0	0	0	0	0	0	0	0	0	0	0	0	0	0	0
P	788	168.082	11.2943		167.075		Epinine	C9H13NO2	Alkaloid from Cytisus scoparius, Vicia faba and Lophophora williamsii (Leguminosae, Cactaceae). Active metab. of Ibopamine	0	0	0	80159.4	0	0	0	0	0	0	0	0	0	0	0	0	0	0	0	0	0	0	0	0	0	0	0	0	0	0	0	0	0	0	0	0	0	0	0	0
P	875	168.083	11.335	CH9N7O3	167.076		3-Hydroxy-4-methoxyphenethylamine	C9H13NO2	Alkaloid from Acacia rigidula, Pachycereus pecten-aboriginum, the soft coral Nephthea sp., and human urine	0	69041.4	3180.77	0	74953.8	0	0	0	0	0	0	0	73854.8	0	0	0	52430.2	44991.2	0	0	0	0	0	0	0	0	21404.1	0	28920.5	0	22426	28963	21725.4	0	0	0	17646.3	0	0	0
P	4029	168.101	9.172	C3H14N5OP	167.093		4-Hydroxy-3-methoxyphenethylamine	C9H13NO2	Alkaloid from Lophophora williamsii, Carnegiea gigantea, Trichocereus spp. Echinocereus merkeri and other cacti, also found in crown gall tumours. Constit. of human brain tissue and urine	0	5925	0	0	5485.7	8073.15	0	0	0	0	0	0	4830.61	2016.58	0	0	0	5264.75	3996.65	0	0	0	0	0	0	0	187885	0	2110.8	0	100737	58644.9	63269.8	0	0	0	81661.9	0	0	0
P	4758	168.102	9.23697	C2H13N7S	167.095	2.93874	Synephrine; (R)-form	C9H13NO2	A widely distributed alkaloid, occurs in Citrus spp. and Coryphantha spp., in Ficus bengalensis and a no. of Amaryllidaceae spp., also in Haloxylon salicornicum (opt. rotn. of isolates not reported in many cases)	0	0	0	0	0	0	0	0	0	0	0	0	0	0	0	0	0	0	0	0	0	0	0	0	0	0	0	0	0	0	0	0	0	100418	0	0	0	0	0	167675
P	4262	168.104	9.21489		167.096					0	0	0	0	0	0	0	0	0	0	0	0	0	0	0	0	0	0	0	0	0	0	0	0	0	0	0	156113	0	122634	0	0	0	0	0	108798	0	0	0	0
P	3624	168.105	9.23198	C6H17NO2S	167.098					0	0	0	0	0	0	0	0	0	0	0	0	0	0	0	0	0	0	0	0	0	0	0	0	0	214197	0	0	0	0	0	0	0	0	0	0	0	0	221515	0
P	4832	168.106	9.24014	C6H19NP2	167.099					0	0	0	0	0	0	0	0	0	0	0	0	0	0	0	0	0	0	0	0	0	0	0	0	0	0	0	0	0	0	0	0	0	0	146811	0	0	151467	0	0
P	4399	168.108	9.22887	C3H13N5O3	167.101					0	0	0	0	0	0	0	0	0	0	0	0	0	0	0	0	0	0	0	0	0	0	0	0	0	0	0	0	181595	0	0	185722	179568	0	0	0	0	0	0	0
P	3900	168.109	9.20899	C3H13N5O3	167.102					0	0	0	0	5200.64	8421.47	0	0	0	0	0	0	4425.85	6464.61	0	0	0	4228.22	3583.27	0	0	0	0	0	0	0	575026	0	0	0	195298	147058	146858	9215.45	0	0	225790	0	0	0
P	4739	168.111	9.23697		167.103					0	0	0	0	0	0	0	0	0	0	0	0	0	0	0	0	0	0	0	0	0	0	0	0	0	0	0	0	0	0	0	0	0	211074	0	0	0	0	0	192558
P	4186	168.112	9.22198	C2H14N7P	167.105					0	0	0	0	0	0	0	0	0	0	0	0	0	0	0	0	0	0	0	0	0	0	0	0	0	0	0	210926	0	208225	0	0	0	0	0	257932	0	0	194990	0
P	3555	168.114	9.23304	C6H18NO2P	167.107					0	0	0	0	0	0	0	0	0	0	0	0	0	0	0	0	0	0	0	0	0	0	0	0	0	308300	0	0	0	0	0	0	0	0	0	0	0	267855	0	0
P	4815	168.115	9.24279	C6H18NO2P	167.108					0	0	0	0	0	0	0	0	0	0	0	0	0	0	0	0	0	0	0	0	0	0	0	0	0	0	0	0	0	0	0	0	0	0	286866	0	0	0	0	0
P	3883	168.117	9.21791	C5H17N3OS	167.109					0	9306.78	6598.84	0	2447.27	0	0	0	0	0	0	0	3159.21	0	0	0	6168.64	7645.87	0	0	0	0	0	0	0	0	249324	0	231481	0	250528	227805	234348	0	0	0	14318.4	0	0	0
P	4736	168.119	9.77164		167.111					3649.53	0	0	0	0	6996.19	11937.8	0	0	0	0	7379.97	0	3934.48	0	0	0	0	8913.31	5883.85	0	0	0	0	0	0	0	0	0	0	0	0	0	275304	0	0	254918	0	0	206800
P	4182	168.12	9.21489	C2H13N7O2	167.113					0	0	0	0	0	0	0	0	0	0	0	0	0	0	0	0	0	0	0	0	0	0	0	0	0	0	0	210346	0	236371	0	0	0	0	0	254195	0	0	0	0
P	3569	168.121	9.23198		167.114					0	0	0	0	0	0	0	0	0	0	0	0	0	0	0	0	0	0	0	0	0	0	0	0	0	213897	0	0	0	0	0	0	0	0	0	0	0	0	185641	0
P	4821	168.123	9.24014	C6H17NO4	167.116					0	0	0	0	0	0	0	0	0	0	0	0	0	0	0	0	0	0	0	0	0	0	0	0	0	0	0	0	0	0	0	0	0	0	265162	0	0	182303	0	0
P	6495	168.124	9.24272	C7H13N5	167.117					0	0	0	0	0	0	0	0	0	0	0	0	0	0	0	0	0	0	0	0	0	0	0	0	0	0	0	0	0	0	0	0	0	0	0	0	0	0	0	0
P	3911	168.125	9.15065	C7H13N5	167.118		Anatoxin a; (+)(HCl)-form, 2,3-Dihydro	C10H17NO	Isol. from environmental samples	0	7185.88	0	0	7758.69	18914.6	0	0	0	0	0	0	8354.2	0	0	0	5281.32	6847.06	0	0	0	0	0	0	0	0	173905	0	214594	0	188050	182197	218697	0	0	0	155262	0	0	0
P	4741	168.127	9.73222	C5H18N3OP	167.12		Camphor; (+)-form, Oxime	C10H17NO		2420.25	0	0	0	0	18914.6	8975.81	0	0	0	0	5152.89	0	3328.76	0	0	0	0	3469.17	6275.84	0	0	0	0	0	0	0	0	0	0	0	0	0	201804	0	0	197364	0	0	144971
P	4228	168.128	9.21489	C4H17N5S	167.121		2,4-Decadienoic acid; (2E,4Z)-form, Amide	C10H17NO	Isol. from Amycolatopsis sp.	0	0	0	0	0	0	0	0	0	0	0	0	0	0	0	0	0	0	0	0	0	0	0	0	0	0	0	152248	0	144887	0	0	0	0	0	178327	0	0	0	0
P	3632	168.13	9.23198		167.122		4,5-Dialkyloxazoles; 4-Ethyl-5-pentyloxazole	C10H17NO		0	0	0	0	0	0	0	0	0	0	0	0	0	0	0	0	0	0	0	0	0	0	0	0	0	150663	0	0	0	0	0	0	0	0	0	0	0	0	126123	0
P	4844	168.131	9.24014	CH13N9O	167.124		4,5-Dialkyloxazoles; 5-Hexyl-4-methyloxazole	C10H17NO		0	0	0	0	0	0	0	0	0	0	0	0	0	0	0	0	0	0	0	0	0	0	0	0	0	0	0	0	0	0	0	0	0	0	146061	0	0	121052	0	0
P	6518	168.132	9.24272	CH13N9O	167.125		Fenchone; (+)-form, Z-Oxime	C10H17NO		0	0	0	0	0	0	0	0	0	0	0	0	0	0	0	0	0	0	0	0	0	0	0	0	0	0	0	0	0	0	0	0	0	0	0	0	0	0	0	0
P	3988	168.133	9.18163	C5H17N3O3	167.126		4-Hydroxy-2-(1,3-pentadienyl)piperidine; (1'E,2S,3'E,4S)-form	C10H17NO	From a Streptomyces sp.	0	7284.35	0	0	7450.47	9178.7	0	0	0	0	0	0	6457.34	0	0	0	5018.92	8181.79	0	0	0	0	0	0	0	0	127447	0	126174	0	147249	182155	141289	0	0	0	96188.1	0	0	0
P	4317	168.137	9.21489	C4H18N5P	167.129		4-Hydroxy-2-(1,3-pentadienyl)piperidine; (1'E,2R,3'E,4R)-form	C10H17NO	Prod. by Streptomyces sp. GT 41006	0	0	0	0	0	0	0	0	0	0	0	0	0	0	0	0	0	0	0	0	0	0	0	0	0	0	0	88531.5	0	101470	0	0	0	0	0	104662	0	0	0	0
P	3758	168.138	9.20983	C10H17NO	167.131	-1.27934	Incarvilline; 7,7a-Diepimer, 6-ketone, N-de-Me	C10H17NO	Alkaloid from the leaves of Kopsia pauciflora	0	0	0	0	0	0	0	0	0	0	0	0	0	0	0	0	0	0	0	0	0	0	0	0	0	93170.1	0	0	0	0	0	0	0	0	0	0	0	0	0	0
P	4878	168.14	9.22638		167.132		1-Phenyl-2,4-hexadiyn-1-one	C12H8O	Constit. of essential oil from Artemisia capillaris, Artemisia dracunculus (tarragon), Chrysanthemum spp. and Santolina rosmarinifolia	0	0	0	0	0	0	0	0	0	0	0	0	0	0	0	0	0	0	0	0	0	0	0	0	0	0	0	0	0	0	0	0	0	0	89008.8	0	0	0	0	0
P	2828	169.054	7.3238	C5H14O2P2	168.046					0	0	0	0	0	0	0	0	0	0	0	0	0	0	81628.4	0	0	0	0	0	0	0	0	0	0	0	0	0	0	0	0	0	0	0	0	0	0	0	0	0
P	3358	169.055	7.31829	C4H13N2OPS	168.048					0	0	0	0	0	0	0	0	0	0	0	0	0	0	0	0	0	0	0	0	0	98192.6	75235.9	0	95618.5	0	0	0	0	0	0	0	0	0	0	0	0	0	0	0
P	2956	169.057	7.32684	C2H8N4O5	168.05					0	0	0	0	0	0	0	0	0	0	0	0	0	0	0	103638	0	0	0	0	0	0	0	140883	0	0	0	0	0	0	0	0	0	0	86695.8	0	0	0	0	0
P	3053	169.058	7.32445	C3H4N8O	168.051					0	0	0	0	0	0	0	0	0	0	0	0	0	0	0	0	120032	0	0	0	0	0	0	0	0	0	0	0	73010.9	0	0	0	0	0	0	0	0	0	0	0
							Azepinomycin	C6H8N4O2	Prod. by Streptomyces MF718-03
P	2626	169.06	7.32014	CH9N6O2P	168.052					0	0	0	0	0	9660.62	0	0	0	0	0	0	6902.72	170417	0	0	0	144890	157573	0	0	0	0	0	0	0	88948	0	79468	0	99795.5	105269	139450	0	0	0	93887.7	0	0	0
P	2754	169.062	7.32216	H8N8OS	168.055		Azepinomycin	C6H8N4O2	Prod. by Streptomyces MF718-03	0	0	0	0	0	0	0	0	0	0	0	0	0	0	224080	0	0	0	0	180562	189273	0	0	0	0	0	0	116252	0	0	0	0	0	140735	0	104805	0	0	0	115718
P	3338	169.064	7.31726	C6H9N4P	168.056					0	0	0	0	0	0	0	0	0	0	0	0	0	0	0	0	0	0	0	0	0	231310	200184	0	224424	133260	0	0	0	127852	0	0	0	0	0	0	0	0	132525	0
P	2896	169.065	7.32448	C4H14N2OP2	168.058	1.87312				0	0	0	0	0	0	0	0	0	0	0	0	0	0	0	258271	0	0	0	0	0	0	0	257940	0	0	0	0	0	0	0	0	0	0	146060	0	0	145982	0	0
P	3033	169.067	7.29785	C3H13N4PS	168.06					0	0	0	0	0	0	0	0	0	0	0	0	0	0	0	0	246994	0	0	0	0	0	0	0	0	0	0	0	157205	0	0	0	0	0	0	0	0	0	0	0
P	2611	169.068	7.50139	CH8N6O4	168.061					0	0	0	0	1338.81	8732.81	0	0	0	0	0	0	7300.94	267361	0	0	0	265314	274357	0	0	0	0	0	0	0	158737	0	156815	0	169363	213524	182741	0	0	0	154016	0	0	0
P	2748	169.07	7.32216	C5H12O6	168.063		β-Carboline	C11H8N2	Alkaloid from Chrysophyllum lacourtianum, Nocardia sp., Catharanthus roseus leaves, Lolium perenne, Strychnos johnsonii, Strychnos potatorum, and Festuca arundinacea. Prod. by Streptomyces sp., a metab. from the New Zealand ascidian Ritterella sigillinoides. Also a trace constit. of the fluorescent dinoflagellate Noctiluca miliaris. Trace constit. of tobacco	0	0	0	0	0	0	0	0	0	0	0	0	0	0	272258	0	0	0	0	298760	283393	0	0	0	0	0	0	174462	0	0	0	0	0	169955	0	153105	0	0	0	195553
P	3334	169.072	7.31726	C6H8N4O2	168.065	-0.510204	3-(2-Isocyanoethenyl)-1H-indole; (Z)-form	C11H8N2	Isol. from an unidentified Pseudomonas sp. and from the marine Streptomyces sp. SF2636	0	0	0	0	0	0	0	0	0	0	0	0	0	0	0	0	0	0	0	0	0	313312	300536	0	283745	170283	0	0	0	177747	0	0	0	0	0	0	0	0	202122	0
P	3445	169.072	4.30558	C6H8N4O2	168.065	0.520924	1H-Pyrrole-2-carboxylic acid; N-Ph, nitrile	C11H8N2		0	0	0	0	0	0	0	0	0	0	0	0	0	0	0	0	0	0	0	0	0	0	0	0	188589	0	0	0	0	0	0	0	0	0	0	0	0	0	0	0
P	797	169.073	4.27018	C4H13N2O3P	168.066					0	0	0	170696	0	0	0	0	0	0	0	0	0	0	0	193365	0	0	0	0	0	0	0	252551	0	0	0	0	0	0	0	0	0	0	0	0	0	230974	0	0
P	2892	169.073	7.32448	C4H13N2O3P	168.066		β-Carboline	C11H8N2	Alkaloid from Chrysophyllum lacourtianum, Nocardia sp., Catharanthus roseus leaves, Lolium perenne, Strychnos johnsonii, Strychnos potatorum, and Festuca arundinacea. Prod. by Streptomyces sp., a metab. from the New Zealand ascidian Ritterella sigillinoides. Also a trace constit. of the fluorescent dinoflagellate Noctiluca miliaris. Trace constit. of tobacco	0	0	0	0	0	0	0	0	0	0	0	0	0	0	0	282792	0	0	0	0	0	0	0	304674	0	0	0	0	0	0	0	0	0	0	168012	0	0	197100	0	0
P	3083	169.075	4.26396	C3H12N4O2S	168.067		3-(2-Isocyanoethenyl)-1H-indole; (Z)-form	C11H8N2	Isol. from an unidentified Pseudomonas sp. and from the marine Streptomyces sp. SF2636	0	0	0	0	0	0	0	0	0	0	0	0	0	0	0	0	249577	0	0	0	0	0	0	0	0	0	0	0	0	0	0	0	0	0	174929	0	0	0	0	0
P	3030	169.075	7.3212	C3H12N4O2S	168.068					0	0	0	0	0	0	0	0	0	0	0	0	0	0	0	0	263857	0	0	0	0	0	0	0	0	0	0	0	171520	0	0	0	0	0	0	0	0	0	0	0
P	6432	169.076	3.85568	C3H12N4O2S	168.068	-2.30134				0	0	0	0	0	0	0	0	0	0	0	0	0	0	0	0	0	0	0	0	0	0	0	0	0	0	0	0	0	0	0	0	0	0	0	0	0	0	0	0
P	488	169.076	4.22365	C11H8N2	168.069					0	210669	0	0	208122	236677	0	0	0	0	0	0	241957	307807	0	0	0	309621	0	0	0	0	0	0	0	0	361816	0	302168	0	374039	0	0	0	0	0	291856	0	0	0
P	2613	169.076	7.32153	C11H8N2	168.069	1.76832				0	0	0	0	0	8085.61	0	0	0	0	0	0	4895.45	242564	0	0	0	264239	257074	0	0	0	0	0	0	0	164289	0	169499	0	231711	198181	164335	0	0	0	161692	0	0	0
P	1632	169.078	4.72036	C9H13OP	168.07					4521.02	0	0	0	0	0	289021	0	0	0	0	279972	0	149936	482724	0	0	0	349481	390856	0	0	0	0	0	0	363415	0	0	0	372001	400783	344823	10089.6	0	0	294567	0	0	545307
P	2753	169.078	7.32425	C9H13OP	168.071					0	0	0	0	0	0	0	0	0	0	0	0	0	0	201504	0	0	0	0	260140	239389	0	0	0	0	0	0	164982	0	0	0	0	0	151064	0	143825	0	0	0	184389
P	1994	169.079	4.26977	H8N8O3	168.072					0	0	0	0	0	0	0	364248	0	351668	320407	0	0	0	0	0	0	0	0	0	452639	0	508954	0	0	0	0	0	0	0	0	0	0	386727	0	419987	0	0	0	0
P	3339	169.08	7.31726	C8H12N2S	168.073					0	0	0	0	0	0	0	0	0	0	0	0	0	0	0	0	0	0	0	0	0	246606	230148	0	218918	149072	0	0	0	321209	0	0	0	0	0	0	0	0	179559	0
P	2370	169.081	4.27227	C6H17OPS	168.074		Avellaneol; (3R,4E,6E)-form	C9H12O3	Metab. of Hypocrea avellanea	0	0	0	0	0	0	0	0	382316	0	0	0	0	0	0	574571	0	0	0	0	0	600313	0	663236	625891	618616	0	541317	0	552028	0	0	0	0	0	0	0	839743	671315	0
P	2900	169.082	7.32657	C4H12N2O5	168.074		Avellaneol; (3S,4Z,6E)-form	C9H12O3	Metab. of a Lachnellula sp.	0	0	0	0	0	0	0	0	0	0	0	0	0	0	0	204257	0	0	0	0	0	0	0	202252	0	0	0	0	0	0	0	0	0	0	145958	0	0	164011	0	0
P	718	169.083	4.26393	C5H16N2S2	168.075		1,2,4-Benzenetriol; 1-Et, 2-Me ether	C9H12O3		0	0	0	522206	0	0	0	0	0	0	0	0	0	0	0	0	671008	0	0	0	0	0	0	0	0	0	0	0	0	0	0	0	0	0	598546	0	0	0	0	0
P	631	169.083	3.6216	C5H16N2S2	168.075		1,3,5-Benzenetriol; Tri-Me ether	C9H12O3	Constit. of Rosa spp., Ticorea longiflora and Zieria chevalieri	0	0	579385	0	0	0	0	0	0	0	0	0	0	0	0	0	0	0	0	0	0	0	0	0	0	0	0	0	0	0	0	0	0	0	0	0	0	0	0	0
P	3038	169.083	7.3212	C5H8N6O	168.076		Daphniacetal A	C9H12O3	Constit. of the fresh fruit of Daphniphyllum macropodum	0	0	0	0	0	0	0	0	0	0	0	0	0	0	0	0	180005	0	0	0	0	0	0	0	0	0	0	0	173664	0	0	0	0	0	0	0	0	0	0	0
P	6174	169.084	3.85568	C5H8N6O	168.077		6-Deoxyaucubigenin	C9H12O3		0	0	0	0	0	0	0	0	0	0	0	0	0	0	0	0	0	0	0	0	0	0	0	0	0	0	0	0	0	0	0	0	0	0	0	0	0	0	0	0
P	2624	169.085	7.50781	C3H13N4O2P	168.077		2,4-Dihydroxybenzyl alcohol; 2,4-Di-Me ether	C9H12O3		0	0	0	0	1138.68	7682.25	0	0	0	0	0	0	7971.83	164298	0	0	0	171721	161316	0	0	0	0	0	0	0	128205	0	142845	0	146831	124260	117961	0	0	0	114618	0	0	0
P	250	169.085	4.22345	C3H13N4O2P	168.077		2,5-Dihydroxybenzyl alcohol; 2-Et ether	C9H12O3	Constit. of Curculigo capitulata	0	566567	0	0	581972	609789	0	0	0	0	0	0	602902	771245	0	0	0	749619	803515	0	0	0	0	0	0	0	871670	0	842256	0	881115	0	786342	0	0	0	750570	0	0	0
P	1476	169.086	4.68476	C9H12O3	168.079	0.122608	4-Hydroxy-6-isopropyl-3-methyl-2H-pyran-2-one	C9H12O3	Prod. by Streptomyces coelicoflavus USF-6280 and Streptomyces coelicolor A3(2)	3868.66	0	0	0	0	0	662062	0	0	0	0	646098	0	0	919504	0	0	0	800779	840195	867200	0	0	0	0	0	842957	0	0	0	831785	829766	794422	409382	0	0	736181	0	0	1.36881e+06
P	2773	169.087	7.32659	C2H12N6OS	168.079					0	0	0	0	0	0	0	0	0	0	0	0	0	0	140505	0	0	0	0	165949	151819	0	0	0	0	0	0	0	0	0	0	0	0	118817	0	101949	0	0	0	194157
P	1894	169.087	4.26977	C2H12N6OS	168.08					0	0	0	0	0	0	0	736499	0	700338	682182	0	0	0	0	0	0	0	0	0	870344	0	929933	0	0	0	0	0	0	0	0	0	0	884088	0	843786	0	0	0	0
P	3347	169.088	7.31818	C8H13N2P	168.081					0	0	0	0	0	0	0	0	0	0	0	0	0	0	0	0	0	0	0	0	0	139616	143960	0	130391	117058	0	326467	0	154979	0	0	0	0	0	0	0	0	162133	0
P	2312	169.089	4.26988	C8H13N2P	168.082					0	0	0	0	0	0	0	0	726045	0	0	0	0	0	0	972071	0	0	0	0	0	955716	0	984998	973505	1.09491e+06	0	1.05097e+06	0	964739	0	0	0	0	0	0	0	1.55473e+06	1.41994e+06	0
P	2929	169.09	7.33074	C6H18OP2	168.083					0	0	0	0	0	0	0	0	0	0	0	0	0	0	0	132779	0	0	0	0	0	0	0	117467	0	0	0	0	0	0	0	0	0	0	101974	0	0	204426	0	0
P	707	169.091	4.26393	C6H18OP2	168.084		Cyclo(alanylprolyl); (3S,8aS)-form	C8H12N2O2	Isol. from cocoa, Pestalotia palmarum, Panax notoginseng, root of Psammosilene tunicoides and the Caribbean sponge Tedania ignis. Also prod. by Streptomyces spp. Metab. of Pseudoalteromonas haloplanktis, Penicillium janthinellum and Cordyceps militaris	0	0	0	814374	0	0	0	0	0	0	0	0	0	0	0	0	991770	0	0	0	0	0	0	0	0	0	0	0	0	0	0	0	0	0	974639	0	0	0	0	0
P	607	169.091	3.6216	C6H18OP2	168.084		Cyclo(alanylprolyl); (3R,8aS)-form	C8H12N2O2	Isol. from a Callyspongia sp., Prod. by a marine-derived Penicillium terrestre	0	0	917759	0	0	0	0	0	0	0	0	0	0	0	0	0	0	0	0	0	0	0	0	0	0	0	0	0	0	0	0	0	0	0	0	0	0	0	0	0
P	3063	169.091	7.32445	C5H17N2PS	168.084		1,2-Di-2-butenoylhydrazine; (E,E)-form	C8H12N2O2	Constit. of the bulbs of Crinum defixum	0	0	0	0	0	0	0	0	0	0	0	0	0	0	0	0	120978	0	0	0	0	0	0	0	0	0	0	0	116692	0	0	0	0	0	0	0	0	0	0	0
P	203	169.093	4.2273	C3H12N4O4	168.086		2-Hydroxy-3-isopropylpyrazine; OH-form, 1'-Hydroxy, Me ether	C8H12N2O2	Prod. by Chondromyces crocatus	0	801078	0	0	848711	836583	0	0	0	0	0	0	825759	1.03091e+06	0	0	0	1.02181e+06	999997	0	0	0	0	0	0	0	1.10738e+06	0	1.10167e+06	0	998282	0	964865	0	0	0	1.07248e+06	0	0	0
P	2652	169.093	7.33033	C3H12N4O4	168.086		1H-Imidazole-4(5)-propanoic acid; Et ester	C8H12N2O2		0	0	0	0	0	10051.6	0	0	0	0	0	0	19998.9	112201	0	0	0	109956	103670	0	0	0	0	0	0	0	312459	0	92707.7	0	81895.1	77281.2	94564.1	0	0	0	135577	0	0	0
P	1456	169.094	4.70923	C4H8N8	168.087		3-Isopropyl-6-methylene-2,5-piperazinedione; (S)-form	C8H12N2O2	Prod. by the marine bacterium Vibrio parahaemolyticus, the mangrove-derived Streptomyces sp. H7372 and Pseudomonas aeruginosa	3998.35	0	0	0	0	0	827310	0	0	0	0	806194	0	0	971224	0	0	0	1.0005e+06	1.00028e+06	964214	0	0	0	0	0	1.04518e+06	0	0	0	994544	974713	1.00084e+06	461112	0	0	969495	0	0	1.77709e+06
P	2834	169.095	7.33069	C4H8N8	168.087		Tetramethylpyrazine; 1,4-Dioxide	C8H12N2O2		0	0	0	0	0	0	0	0	0	0	0	0	0	0	88704.3	0	0	0	0	111927	94960.1	0	0	0	0	0	0	0	0	0	0	0	0	0	0	0	0	0	0	457380
P	1884	169.096	4.26977	C2H13N6OP	168.088		Uracil; Di-OH-form, Di-Et ether	C8H12N2O2		0	0	0	0	0	0	0	806899	0	787138	795159	0	0	0	0	0	0	0	0	0	977031	0	959039	0	0	0	0	0	0	0	0	0	0	984035	0	982784	0	0	0	0
P	3367	169.097	7.32429	C8H12N2O2	168.089	-2.5167	Uracil; 1-Butyl	C8H12N2O2		0	0	0	0	0	0	0	0	0	0	0	0	0	0	0	0	0	0	0	0	0	89599.5	91806.1	0	77726.8	0	0	0	0	0	0	0	0	0	0	0	0	0	190385	0
P	2310	169.097	4.26969	C8H12N2O2	168.09		4-Methylbiphenyl	C13H12	Present in cocoa	0	0	0	0	0	0	0	0	749917	0	0	0	0	0	0	918450	0	0	0	0	0	943252	0	879865	916068	1.07555e+06	0	1.03548e+06	0	944799	0	0	0	0	0	0	0	1.64132e+06	1.59627e+06	0
P	3002	169.098	7.33133	CH12N8S	168.091					0	0	0	0	0	0	0	0	0	0	0	0	0	0	0	82889.4	0	0	0	0	0	0	0	0	0	0	0	0	0	0	0	0	0	0	0	0	0	427820	0	0
P	711	169.099	4.26671	C6H17O3P	168.092					0	0	0	710304	0	0	0	0	0	0	0	0	0	0	0	0	847933	0	0	0	0	0	0	0	0	0	0	0	0	0	0	0	0	0	878892	0	0	0	0	0
P	611	169.099	3.6216	C6H17O3P	168.092					0	0	813008	0	0	0	0	0	0	0	0	0	0	0	0	0	0	0	0	0	0	0	0	0	0	0	0	0	0	0	0	0	0	0	0	0	0	0	0	0
P	6163	169.1	3.87235	C5H16N2O2S	168.093					0	0	0	0	0	0	0	0	0	0	0	0	0	0	0	0	0	0	0	0	0	0	0	0	0	0	0	0	0	0	0	0	0	0	0	0	0	0	0	0
P	229	169.101	4.22345	C13H12	168.094	-0.00747471				0	648601	0	0	709460	659552	0	0	0	0	0	0	647921	772497	0	0	0	821449	765157	0	0	0	0	0	0	0	790098	0	832074	0	750120	0	742091	0	0	0	863870	0	0	0
P	1487	169.102	4.71479	C5H18N2P2	168.095					5111.32	0	0	0	0	0	613783	0	0	0	0	610082	0	0	658521	0	0	0	762348	735659	678543	0	0	0	0	0	782757	0	0	0	749940	726921	750603	340152	0	0	784240	0	0	1.29579e+06
P	1917	169.104	4.27454	C2H12N6O3	168.097					0	0	0	0	0	0	0	565668	0	548379	570258	0	0	0	0	0	0	0	0	0	686938	0	651789	0	0	0	0	0	0	0	0	0	0	785795	0	776822	0	0	0	0
P	2336	169.106	4.2684		168.098					0	0	0	0	0	0	0	0	508230	0	0	0	0	0	0	598741	0	0	0	0	0	625047	0	545697	599101	624398	0	627707	0	632839	0	0	0	0	0	0	0	1.12943e+06	1.13949e+06	0
P	636	169.107	3.6216	CH13N8P	168.1					0	0	638228	0	0	0	0	0	0	0	0	0	0	0	0	0	0	0	0	0	0	0	0	0	0	0	0	0	0	0	0	0	0	0	0	0	0	0	0	0
P	721	169.107	4.26393	CH13N8P	168.1					0	0	0	526371	0	0	0	0	0	0	0	0	0	0	0	0	536172	0	0	0	0	0	0	0	0	0	0	0	0	0	0	0	0	0	755692	0	0	0	0	0
P	6214	169.109	3.87235	C7H12N4O	168.101					0	0	0	0	0	0	0	0	0	0	0	0	0	0	0	0	0	0	0	0	0	0	0	0	0	0	0	0	0	0	0	0	0	0	0	0	0	0	0	0
P	305	169.109	4.22345	C5H17N2O2P	168.102					0	441833	0	0	538845	468872	0	0	0	0	0	0	443546	525817	0	0	0	503781	263833	0	0	0	0	0	0	0	460214	0	514085	0	450554	0	462366	0	0	0	563209	0	0	0
P	1564	169.111	4.68365	C5H17N2O2P	168.104		β-Acaridial; 1-Alcohol	C10H16O2	Isol. from the mite Caloglyphus polyphyllae	2134.61	0	0	0	0	0	466393	0	0	0	0	407778	0	0	486424	0	0	0	464770	445236	416795	0	0	0	0	0	466036	0	0	0	455457	434116	501107	229553	0	0	479853	0	0	898123
P	2003	169.112	4.2793	C4H16N4OS	168.105		Allomatatabiol	C10H16O2	Constit. of Actinidia polygama. Component of Mu Tian Liao	0	0	0	0	0	0	0	381887	0	388329	393646	0	0	0	0	0	0	0	0	0	410600	0	390311	0	0	0	0	0	0	0	0	0	0	573196	0	506295	0	0	0	0
P	2395	169.114	4.27108	C10H17P	168.107		Bottrospicatol	C10H16O2	Produced by microbial transformation of carveol by Streptomyces bottropensis	0	0	0	0	0	0	0	0	369730	0	0	0	0	0	0	410398	0	0	0	0	0	374612	0	328268	353661	357485	0	372737	0	380942	0	0	0	0	0	0	0	746465	719484	0
P	747	169.116	4.26116	CH12N8O2	168.108		2-Butene-1,4-diol; (ξ)-form, Di-2-propenyl ether	C10H16O2		0	0	0	408685	0	0	0	0	0	0	0	0	0	0	0	0	390257	0	0	0	0	0	0	0	0	0	0	0	0	0	0	0	0	0	511912	0	0	0	0	0
P	6324	169.117	3.87235		168.11		2-Butyl-4,5-dimethyl-3(2H)-furanone; (ξ)-form	C10H16O2	Isol. from green tea (Camellia sinensis)	0	0	0	0	0	0	0	0	0	0	0	0	0	0	0	0	0	0	0	0	0	0	0	0	0	0	0	0	0	0	0	0	0	0	0	0	0	0	0	0
P	408	169.118	4.22858	C5H16N2O4	168.11		Chrysanthemic acid	C10H16O2		0	340950	0	0	388178	411216	0	0	0	0	0	0	452028	319198	0	0	0	358638	143849	0	0	0	0	0	0	0	275440	0	306090	0	264581	0	326260	0	0	0	354920	0	0	0
P	1666	169.119	4.73369	C6H12N6	168.112		Chrysanthemic acid; (1R,3R)-form	C10H16O2	Occurs as pyrethrolone ester as one of the pyrethrins	5040.87	0	0	0	0	0	344001	0	0	0	0	296544	0	0	429329	0	0	0	321381	301282	257509	0	0	0	0	0	281173	0	0	0	273075	291548	353401	128115	0	0	298909	0	0	463737
P	2113	169.12	4.28407	C6H12N6	168.113		Chrysanthemic acid; (1S,3S)-form	C10H16O2		0	0	0	0	0	0	0	282051	0	323029	309620	0	0	0	0	0	0	0	0	0	283623	0	284185	0	0	0	0	0	0	0	0	0	0	383458	0	349123	0	0	0	0
P	2473	169.122	4.27584	C10H16O2	168.115	-0.569186	5-Methyl-3-(2-methylbutyl)-2(5H)-furanone; (2'S,5S)-form	C10H16O2	Prod. by Streptomyces avermitilis	0	0	0	0	0	0	0	0	268259	0	0	0	0	0	0	347427	0	0	0	0	0	263970	0	249101	225129	193896	0	210215	0	216265	0	0	0	0	0	0	0	367031	387838	0
P	800	169.124	4.26116		168.117					0	0	0	216096	0	0	0	0	0	0	0	0	0	0	0	0	256423	0	0	0	0	0	0	0	0	0	0	0	0	0	0	0	0	0	266641	0	0	0	0	0
P	3159	169.126	5.13191	H12N10O	168.119					0	83659.5	0	0	11777.8	80072.5	0	0	0	0	0	0	142434	71624.7	0	0	0	343825	0	0	0	0	0	0	0	0	129099	0	158649	0	82962.6	0	0	0	0	0	142121	0	0	0
P	6744	170.059	8.34215	C5H8N5P	169.051					0	0	0	0	0	0	0	0	0	0	0	0	0	0	0	0	0	0	0	0	0	0	0	0	0	0	0	0	0	0	0	0	0	0	0	0	0	0	0	0
P	6593	170.06	8.33809	C11H7NO	169.053	-1.33773	3-Methyl-2,3'-bipyridine	C11H10N2	Trace constit. of the marine hoplonemertine Amphiporus angulatus	0	0	0	0	0	0	0	0	0	0	0	0	0	0	0	0	0	0	0	0	0	0	0	0	0	0	0	0	0	0	0	0	0	0	0	0	0	0	0	0
P	6357	170.061	8.33099	C3H13N3OP2	169.054		4-Methyl-3,3'-bipyridine	C11H10N2	Isol. from burley tobacco (Nicotiana tabacum)	0	0	0	0	0	0	0	0	0	0	0	0	0	0	0	0	0	0	0	0	0	0	0	0	0	0	0	0	0	0	0	0	0	0	0	0	0	0	0	0
P	5985	170.064	8.33343	CH3N11	169.057		3-Methyl-1H-indole-2-carboxylic acid; N-Me, nitrile	C11H10N2		0	0	0	0	0	0	0	0	0	0	0	0	0	0	0	0	0	0	0	0	0	0	0	0	0	0	0	0	0	0	0	0	0	0	0	0	0	0	0	74002.6
P	5647	170.067	8.33403	C5H15NOS2	169.059					0	0	0	0	0	0	0	0	0	0	0	0	0	0	0	0	0	0	0	0	0	0	0	0	0	0	0	0	0	0	0	0	0	0	0	0	0	0	76051.4	0
P	5338	170.068	8.33555	C5H7N5O2	169.061					0	0	0	0	0	0	0	0	0	0	0	0	0	0	0	0	0	0	0	0	0	0	0	0	0	0	0	0	0	0	0	0	0	0	0	0	0	68365.7	0	0
							2-Chloro-7-methyl-3-methylene-1,6-octadiene	C10H15Cl	Constit. of Chondrococcus (Desmia) hornemanni (Portieria hornemannii) and Chondrococcus japonicus
P	6403	170.07	8.33099	C3H12N3O3P	169.062					0	0	0	0	0	0	0	0	0	0	0	0	0	0	0	0	0	0	0	0	0	0	0	0	0	0	0	0	0	0	0	0	0	0	0	0	0	0	0	0
P	5701	171.073	2.25463	C2H10N4O5	170.065					0	0	0	0	0	0	0	0	0	0	0	0	0	0	0	0	0	0	0	0	0	0	0	0	0	0	0	0	0	0	0	0	0	0	0	0	0	0	70885.6	0
P	801	171.092	7.25091	C11H10N2	170.084	-1.01255				0	0	0	73758.7	0	0	0	0	0	0	0	0	0	0	0	0	0	0	0	0	0	0	0	79933	0	0	0	0	0	0	0	0	0	0	0	0	0	0	0	0
P	505	171.093	7.22993	C9H15OP	170.086					0	82642.4	0	0	78343.3	0	0	0	0	0	0	0	0	0	0	0	0	0	0	0	0	0	0	0	0	0	0	0	0	0	0	0	0	0	0	0	0	0	0	0
P	1277	171.094	7.41325	C9H15OP	170.087	2.07143				0	0	0	0	4495.95	89796.2	0	0	0	0	0	0	87212.8	93748.2	0	0	0	81397.3	102204	0	0	0	0	0	0	0	90600.2	0	70750.2	0	84952.9	79992.1	82096.3	0	0	0	79179.1	0	0	0
P	1674	171.095	7.24102	C8H14N2S	170.088					0	0	0	0	0	0	107843	0	0	0	0	104432	0	0	0	0	0	0	96080.9	110218	0	0	0	0	0	0	0	0	0	0	0	0	0	98760.8	0	0	0	0	0	307662
P	2036	171.097	7.23925	C4H14N2O5	170.089					0	0	0	0	0	0	0	254534	0	126671	115771	0	0	0	283666	0	0	0	0	0	264937	0	278648	0	0	0	0	274958	0	119822	0	0	0	0	0	100847	0	0	365884	0
P	2397	171.099	7.24652	C5H10N6O	170.091					0	0	0	0	0	0	0	0	263918	0	0	0	0	0	0	334074	0	0	0	0	0	302739	0	374154	306582	301712	0	0	0	0	0	0	0	0	0	0	0	436798	0	0
P	288	171.101	7.22813	C3H15N4O2P	170.093					0	360532	191098	347297	363089	0	0	0	0	0	0	0	0	0	0	0	363186	0	0	0	0	0	0	0	0	0	0	0	0	0	0	0	0	0	297143	0	0	0	0	0
P	1071	171.102	7.42298	C2H14N6OS	170.095					0	0	0	0	3381.62	375471	0	0	0	0	0	0	360869	405714	0	0	0	401303	203170	0	0	0	0	0	0	0	384998	0	339512	0	371245	362275	358136	0	0	0	359685	0	0	0
P	1523	171.104	7.24102		170.096		2,8,10-Tridecatriene-4,6-diyne	C13H14	Isol. from Aethusa cynapium, Peucedanum verticillare, Pimpinella magna and Pimpinella anisun	0	0	0	0	0	0	403278	0	0	0	0	400032	0	0	0	0	0	0	404534	439233	0	0	0	0	0	0	0	0	0	0	0	0	0	382931	0	0	0	0	0	576209
P	1921	171.105	7.24091	C8H15N2P	170.098					0	0	0	0	0	0	0	426835	0	408195	403608	0	0	0	450583	0	0	0	0	0	456652	0	455992	0	0	0	0	409458	0	404753	0	0	0	0	0	379017	0	0	607281	0
P	2335	171.107	7.24652		170.1		p-Menth-1-ene-8-thiol	C10H18S	Isol. from grapefruit juice	0	0	0	0	0	0	0	0	421235	0	0	0	0	0	0	467425	0	0	0	0	0	455306	0	452352	447097	432600	0	0	0	0	0	0	0	0	0	0	0	644563	0	0
P	257	171.109	7.22628	C3H14N4O4	170.102		p-Menth-1-ene-8-thiol; (R)-form	C10H18S		0	442825	259103	460314	460555	0	0	0	0	0	0	0	0	0	0	0	461512	0	0	0	0	0	0	0	0	0	0	0	0	0	0	0	0	0	422744	0	0	0	0	0
P	1048	171.111	7.41325	C4H10N8	170.103					0	0	0	0	4198.26	439568	0	0	0	0	0	0	429915	465202	0	0	0	460756	214068	0	0	0	0	0	0	0	412367	0	422948	0	406570	399636	413180	0	0	0	391060	0	0	0
P	1508	171.112	7.24102	C2H15N6OP	170.105					0	0	0	0	0	0	438322	0	0	0	0	447277	0	0	0	0	0	0	427318	449570	0	0	0	0	0	0	0	0	0	0	0	0	0	391968	0	0	0	0	0	614027
P	1928	171.113	7.24091	CH14N8S	170.106					0	0	0	0	0	0	0	416423	0	409595	420990	0	0	0	417876	0	0	0	0	0	433171	0	410724	0	0	0	0	377476	0	375096	0	0	0	0	0	362908	0	0	586569	0
P	2341	171.115	7.24652		170.108					0	0	0	0	0	0	0	0	396127	0	0	0	0	0	0	399849	0	0	0	0	0	389934	0	330754	367881	355381	0	0	0	0	0	0	0	0	0	0	0	562939	0	0
P	307	171.117	7.22628	C13H14	170.11	2.12157				0	336838	298584	367310	356436	0	0	0	0	0	0	0	0	0	0	0	366553	0	0	0	0	0	0	0	0	0	0	0	0	0	0	0	0	0	335980	0	0	0	0	0
P	1095	171.119	7.41325		170.112					0	0	0	0	4506.03	324458	0	0	0	0	0	0	322501	337348	0	0	0	348058	154263	0	0	0	0	0	0	0	296452	0	322998	0	281057	297100	311081	0	0	0	281412	0	0	0
P	1580	171.12	7.24102	C10H18S	170.113	-0.140065				0	0	0	0	0	0	308508	0	0	0	0	324778	0	0	0	0	0	0	310550	317419	0	0	0	0	0	0	0	0	0	0	0	0	0	127339	0	0	0	0	0	418752
P	2006	171.122	7.24091		170.114					0	0	0	0	0	0	0	277321	0	282585	297122	0	0	0	270839	0	0	0	0	0	295113	0	272134	0	0	0	0	118049	0	239107	0	0	0	0	0	113438	0	0	384238	0
P	2399	171.124	7.24652	C7H14N4O	170.116					0	0	0	0	0	0	0	0	258444	0	0	0	0	0	0	246168	0	0	0	0	0	250703	0	94684.3	108562	108595	0	0	0	0	0	0	0	0	0	0	0	348478	0	0
P	445	171.126	7.22628		170.118					0	103144	126541	116978	107322	0	0	0	0	0	0	0	0	0	0	0	106135	0	0	0	0	0	0	0	0	0	0	0	0	0	0	0	0	0	94995.5	0	0	0	0	0
P	1229	171.127	7.37017		170.12					0	0	0	0	2946.52	97299	0	0	0	0	0	0	99346.3	95213.3	0	0	0	95673.6	94185.2	0	0	0	0	0	0	0	85058	0	88636.6	0	180571	89884.3	86432.1	0	0	0	78889.2	0	0	0
P	1692	171.129	7.24102		170.121					0	0	0	0	0	0	92461.4	0	0	0	0	94508.3	0	0	0	0	0	0	88698.8	85565.7	0	0	0	0	0	0	0	0	0	0	0	0	0	72921.5	0	0	0	0	0	117863
P	2138	171.13	7.24728	C10H19P	170.122					0	0	0	0	0	0	0	85440.1	0	81182.4	84780.8	0	0	0	72014.7	0	0	0	0	0	80342.1	0	0	0	0	0	0	0	0	0	0	0	0	0	0	0	0	0	0	0
P	2485	171.131	7.24101	CH14N8O2	170.124					0	0	0	0	0	0	0	0	76109.3	0	0	0	0	0	0	0	0	0	0	0	0	69840.1	74028.4	0	0	0	0	0	0	0	0	0	0	0	0	0	0	98322.5	106567	0
P	6589	171.132	7.25395		170.125					0	0	0	0	0	0	0	0	0	0	0	0	0	0	0	0	0	0	0	0	0	0	0	0	0	0	0	0	0	0	0	0	0	0	0	0	0	0	0	0
P	6410	171.134	7.22461		170.127					0	0	0	0	0	0	0	0	0	0	0	0	0	0	0	0	0	0	0	0	0	0	0	0	0	0	0	0	0	0	0	0	0	0	0	0	0	0	0	0
P	2858	173.05	7.64065	C3H13N2O2PS	172.043					0	0	0	0	0	0	0	0	0	0	0	0	0	0	72778.3	0	0	0	0	0	0	0	0	0	0	0	0	0	0	0	0	0	0	0	0	0	0	0	0	0
P	3366	173.052	7.61847	CH8N4O6	172.045					0	0	0	0	0	0	0	0	0	0	0	0	0	0	0	0	0	0	0	0	0	83192.8	73818.6	0	87439.1	0	0	0	0	0	0	0	0	0	0	0	0	0	0	0
P	2980	173.053	7.62365	C2H4N8O2	172.046		Allantoin; (±)-form, 1-Me	C5H8N4O3		0	0	0	0	0	0	0	0	0	0	0	0	0	0	0	89233.4	0	0	0	0	0	0	0	126857	0	0	0	0	0	0	0	0	0	0	0	0	0	0	0	0
P	3079	173.055	7.62412	C8H13PS	172.047					0	0	0	0	0	0	0	0	0	0	0	0	0	0	0	0	100452	0	0	0	0	0	0	0	0	0	0	0	0	0	0	0	0	0	0	0	0	0	0	0
P	2643	173.057	7.47131	[M+Na-H] 21.9825 m/z adduct of 151.0737 m/z	172.049					0	0	0	0	0	2647.47	3132.87	0	0	0	0	2555.63	6216.67	124308	0	0	0	127631	135858	0	0	0	0	0	0	0	1384.91	0	1852.56	0	4709.51	4774.87	4026.16	5751.4	0	0	2405.59	0	0	3288.78
P	2763	173.058	7.62956	C5H9N4OP	172.051					0	0	0	0	0	0	0	0	0	0	0	0	0	0	163923	0	0	0	0	143785	144803	0	0	0	0	0	0	0	0	0	0	0	0	0	0	0	0	0	0	0
P	3343	173.06	7.61847	C3H14N2O2P2	172.053					0	0	0	0	0	0	0	0	0	0	0	0	0	0	0	0	0	0	0	0	0	176163	160667	0	173301	0	0	0	0	0	0	0	0	0	0	0	0	0	0	0
P	2914	173.062	7.63198	C2H13N4OPS	172.054					0	0	0	0	0	0	0	0	0	0	0	0	0	0	0	175957	0	0	0	0	0	0	0	190815	0	0	0	0	0	0	0	0	0	0	0	0	0	0	0	0
P	3041	173.063	7.62412	C8H12O2S	172.056					0	0	0	0	0	0	0	0	0	0	0	0	0	0	0	0	178729	0	0	0	0	0	0	0	0	0	0	0	0	0	0	0	0	0	0	0	0	0	0	0
P	2623	173.065	7.44421	C4H12O7	172.058					0	0	0	0	0	5233.45	5745.74	0	0	0	0	1895.76	6563.47	189321	0	0	0	196843	200093	0	0	0	0	0	0	0	843.843	0	5572.36	0	4717	4521.25	4308.12	1239.3	0	0	7591.15	0	0	3792.6
P	2760	173.067	7.62956	C5H8N4O3	172.06	-0.57749				0	0	0	0	0	0	0	0	0	0	0	0	0	0	191974	0	0	0	0	208044	188965	0	0	0	0	0	0	0	0	0	0	0	0	0	0	0	0	0	0	0
P	3341	173.069	7.61847	C3H13N2O4P	172.061					0	0	0	0	0	0	0	0	0	0	0	0	0	0	0	0	0	0	0	0	0	192792	193263	0	187568	0	0	0	0	0	0	0	0	0	0	0	0	0	0	0
P	2912	173.07	7.63198	C4H9N6P	172.063					0	0	0	0	0	0	0	0	0	0	0	0	0	0	0	183467	0	0	0	0	0	0	0	173664	0	0	0	0	0	0	0	0	0	0	0	0	0	0	0	0
P	3042	173.072	7.62412	C2H14N4OP2	172.064					0	0	0	0	0	0	0	0	0	0	0	0	0	0	0	0	174093	0	0	0	0	0	0	0	0	0	0	0	0	0	0	0	0	0	0	0	0	0	0	0
P	2633	173.074	7.44525	[M+Na-H] 21.9825 m/z adduct of 151.0920 m/z	172.066					0	0	0	0	0	1641.2	5300.65	0	0	0	0	2793.75	3467.09	156807	0	0	0	173225	165345	0	0	0	0	0	0	0	4757.74	0	3404.73	0	3925.63	3225.72	2150.13	1968.82	0	0	6219.35	0	0	3985.62
P	2776	173.075	7.62956	H4N12	172.068					0	0	0	0	0	0	0	0	0	0	0	0	0	0	133480	0	0	0	0	168260	148155	0	0	0	0	0	0	0	0	0	0	0	0	0	0	0	0	0	0	0
P	3350	173.077	7.62403	C3H12N2O6	172.07					0	0	0	0	0	0	0	0	0	0	0	0	0	0	0	0	0	0	0	0	0	135705	138846	0	127397	0	0	0	0	0	0	0	0	0	0	0	0	0	0	0
P	2937	173.078	7.63198	C4H8N6O2	172.071					0	0	0	0	0	0	0	0	0	0	0	0	0	0	0	120618	0	0	0	0	0	0	0	109163	0	0	0	0	0	0	0	0	0	0	0	0	0	0	0	0
P	3065	173.08	7.62412	C2H13N4O3P	172.073					0	0	0	0	0	0	0	0	0	0	0	0	0	0	0	0	110912	0	0	0	0	0	0	0	0	0	0	0	0	0	0	0	0	0	0	0	0	0	0	0
P	2672	173.082	7.40772	[M+Na-H] 21.9825 m/z adduct of 151.0998 m/z	172.075					0	0	0	0	0	2998.1	2255.77	0	0	0	0	1474.06	3782.28	98464.4	0	0	0	105125	98012.5	0	0	0	0	0	0	0	2836.74	0	3181.42	0	4916.11	3761.52	2392.87	1438.56	0	0	3043.74	0	0	3123.65
P	2843	173.084	7.62956	C7H13N2OP	172.076					0	0	0	0	0	0	0	0	0	0	0	0	0	0	77117.5	0	0	0	0	95950.2	88086.5	0	0	0	0	0	0	0	0	0	0	0	0	0	0	0	0	0	0	0
P	3376	173.085	7.62403	C6H12N4S	172.078					0	0	0	0	0	0	0	0	0	0	0	0	0	0	0	0	0	0	0	0	0	76658	78465.3	0	73295.6	0	0	0	0	0	0	0	0	0	0	0	0	0	0	0
P	3006	173.087	7.62373		172.08					0	0	0	0	0	0	0	0	0	0	0	0	0	0	0	74666.1	0	0	0	0	0	0	0	0	0	0	0	0	0	0	0	0	0	0	0	0	0	0	0	0
P	6677	175.129	10.4268		174.122					0	0	0	0	0	0	0	0	0	0	0	0	0	0	0	0	0	0	0	0	0	0	0	0	0	0	0	0	0	0	0	0	0	0	0	0	0	0	0	0
P	5929	175.132	10.4183	C9H18O3	174.125		2,5-Diaminopentanoic acid; (S)-form, 5-N-Tri-Me	C8H18N2O2	Constit. of the red alga Vidalia volubilis	0	0	0	0	0	0	0	0	0	0	0	0	0	0	0	0	0	0	0	0	0	0	0	0	0	0	0	0	0	0	0	0	0	0	0	0	0	0	0	117871
P	5535	175.134	10.4108		174.127		3-Hydroxyoctanoic acid; (R)-form, Hydrazide	C8H18N2O2		0	0	0	0	0	0	0	0	0	0	0	0	0	0	0	0	0	0	0	0	0	0	0	0	0	0	0	0	0	0	0	0	0	0	0	0	0	0	150077	0
P	5150	175.136	10.4239	C8H19N2P	174.128		4-Hydroxyoctanoic acid; (±)-form, Hydrazide	C8H18N2O2		0	0	0	0	0	0	0	0	0	0	0	0	0	0	0	0	0	0	0	0	0	0	0	0	0	0	0	0	0	0	0	0	0	0	0	0	0	166724	0	0
P	6497	175.137	10.4185	C8H19N2P	174.129		8-Hydroxyoctanoic acid; Hydrazide	C8H18N2O2		0	0	0	0	0	0	0	0	0	0	0	0	0	0	0	0	0	0	0	0	0	0	0	0	0	0	0	0	0	0	0	0	0	0	0	0	0	0	0	0
P	4681	175.138	10.4019		174.131		2,3,4,6,7-Pentadeoxy-2,6-diamino-ribo-heptose; D-form, N6-Me	C8H18N2O2	Component of Gentamicin C1	0	0	0	0	0	0	0	0	0	0	0	0	0	0	0	0	0	0	0	0	0	0	0	0	0	0	0	0	0	0	0	103291	107143	0	0	0	0	0	0	0
P	4048	175.14	10.7315		174.133		1,3-Propanediamine; N-tert-Butyloxycarbonyl	C8H18N2O2		1628.24	0	0	0	0	1545.62	1500.03	0	0	0	0	3102.13	2145.05	2452.96	0	0	0	2671.72	4012.71	0	0	0	0	0	0	0	104408	0	0	0	102009	0	0	116423	0	0	65371.6	0	0	204049
P	4913	175.141	10.3937	C4H14N8	174.134					0	0	0	0	0	0	0	0	0	0	0	0	0	0	0	0	0	0	0	0	0	0	0	0	0	0	0	0	0	0	0	0	0	0	0	114427	0	0	0	0
P	4310	175.143	10.3881		174.135					0	0	0	0	0	0	0	0	0	0	0	0	0	0	0	0	0	0	0	0	0	0	0	0	0	0	0	115605	0	113739	0	0	0	0	0	0	0	0	224242	0
P	3736	175.144	10.4147	C8H18N2O2	174.137	0.642813	5,7a-Dihydro-1,4,4,7a-tetramethyl-4H-indene	C13H18	Constit. of quince fruit flavour (Cydonia oblonga)	0	0	0	0	0	0	0	0	0	0	0	0	0	0	0	0	0	0	0	0	0	0	0	0	0	118838	0	0	0	0	0	0	0	0	118636	0	0	216420	0	0
P	6493	175.146	10.4186		174.139					0	0	0	0	0	0	0	0	0	0	0	0	0	0	0	0	0	0	0	0	0	0	0	0	0	0	0	0	0	0	0	0	0	0	0	0	0	0	0	0
P	4464	175.147	10.1314		174.139					0	1754.06	2745.82	4816.85	2558.43	0	0	0	0	0	0	0	3773.33	0	0	0	2267.85	535.034	0	0	0	0	0	0	0	0	0	0	109926	0	0	114294	112558	0	0	0	67515	0	0	0
P	4037	175.148	10.4736	C13H18	174.141	1.1741	4-Isothiocyanato-1-(methylsulfinyl)-1-butene; (R)-(E)-form	C6H9NOS2	Mustard oil from Glucoraphenin (see 4-(Methylthio)-3-butenyl glucosinolate) in radish seeds (Raphanus sativus var. alba) and Matthiola bicornis	0	0	0	0	0	1885.48	0	0	0	0	0	2774.89	3773.33	2581.3	0	0	0	1633.79	1367.89	0	0	0	0	0	0	0	105175	0	0	0	101418	0	0	107309	0	0	106395	0	0	197858
P	4922	175.15	10.4023		174.143					0	0	0	0	0	0	0	0	0	0	0	0	0	0	0	0	0	0	0	0	0	0	0	0	0	0	0	0	0	0	0	0	0	0	0	96558.6	0	0	197656	0
P	5132	175.153	10.4243		174.145					0	0	0	0	0	0	0	0	0	0	0	0	0	0	0	0	0	0	0	0	0	0	0	0	0	0	0	0	0	0	0	0	0	0	0	0	0	173542	0	0
P	6273	175.154	10.4215	C7H18N4O	174.147					0	0	0	0	0	0	0	0	0	0	0	0	0	0	0	0	0	0	0	0	0	0	0	0	0	0	0	0	0	0	0	0	0	0	0	0	0	0	0	0
P	5895	175.157	10.4183		174.15					0	0	0	0	0	0	0	0	0	0	0	0	0	0	0	0	0	0	0	0	0	0	0	0	0	0	0	0	0	0	0	0	0	0	0	0	0	0	0	123942
P	5573	175.159	10.4108		174.152					0	0	0	0	0	0	0	0	0	0	0	0	0	0	0	0	0	0	0	0	0	0	0	0	0	0	0	0	0	0	0	0	0	0	0	0	0	0	121051	0
P	5276	175.161	10.4239	C10H23P	174.154					0	0	0	0	0	0	0	0	0	0	0	0	0	0	0	0	0	0	0	0	0	0	0	0	0	0	0	0	0	0	0	0	0	0	0	0	0	102208	0	0
P	6536	175.162	10.4213		174.155		2-Quinolinemethanethiol	C10H9NS	Constit. of the defensive secretions of the skunks Conepatus mesoleucus, Mephitis mephitis and Spilogale putorius	0	0	0	0	0	0	0	0	0	0	0	0	0	0	0	0	0	0	0	0	0	0	0	0	0	0	0	0	0	0	0	0	0	0	0	0	0	0	0	0
P	2547	176.019	0.235967	H2N9OP	175.012	-2.0592				0	0	0	0	0	0	0	0	0	0	93485.1	0	0	0	0	0	0	0	0	0	0	0	0	0	0	0	0	0	0	0	0	0	0	0	0	0	0	0	0	0
P	2552	176.028	0.235967	C8H5N3S	175.021		2-Amino-3-hydroxy-4-methylenepentanedioic acid; (2S,3S)-form	C6H9NO5	Isol. from Gleditsia caspica	0	0	0	0	0	0	0	0	0	0	58287.8	0	0	0	0	0	0	0	0	0	0	0	0	0	0	0	0	0	0	0	0	0	0	0	0	0	0	0	0	0
P	5349	176.047	9.40564	C6H10NO3P	175.039		Aspartic acid; (S)-form, N-Ac	C6H9NO5	Constit. of soybeans, cereals, coffee, cocoa and tea	0	0	0	0	0	0	0	0	0	0	0	0	0	0	0	0	0	0	0	0	0	0	0	0	0	0	0	0	0	0	0	0	0	0	0	0	0	63339	0	0
P	6507	176.048	9.40939	C5H9N3O2S	175.041		N-(Carboxyacetyl)alanine; (R)-form	C6H9NO5	Isol. from seedlings of Pisum sativum (pea)	0	0	0	0	0	0	0	0	0	0	0	0	0	0	0	0	0	0	0	0	0	0	0	0	0	0	0	0	0	0	0	0	0	0	0	0	0	0	0	0
P	4468	176.05	9.25135	C5H11N3P2	175.043		2-Oxohexanedioic acid; Oxime	C6H9NO5		0	2642.01	0	0	1931.09	1072.26	0	0	0	0	0	0	2605.44	0	0	0	1512.16	836.836	0	0	0	0	0	0	0	0	73161.5	0	66294.1	0	2425.12	61411.8	62538.8	0	0	0	66894	0	0	0
P	4008	176.051	9.76419	CH9N3O7	175.044					3236.27	0	0	0	0	2632.28	906.468	0	0	0	0	3542.74	2605.44	2743.9	0	0	0	836.836	1807.51	0	0	0	0	0	0	0	80164.9	0	0	0	83815.9	0	0	85017.6	0	0	72202.8	0	0	141637
P	4905	176.053	9.39298	C2H5N7O3	175.045	-0.984088				0	0	0	0	0	0	0	0	0	0	0	0	0	0	0	0	0	0	0	0	0	0	0	0	0	0	0	0	0	0	0	0	0	0	0	88409.4	0	0	0	0
P	4232	176.054	9.39293	H10N5O4P	175.047					0	0	0	0	0	0	0	0	0	0	0	0	0	0	0	0	0	0	0	0	0	0	0	0	0	0	0	115444	0	115040	0	0	0	0	0	0	0	0	165503	0
P	3598	176.055	9.40022	C6H9NO5	175.048	0.196772				0	0	0	0	0	0	0	0	0	0	0	0	0	0	0	0	0	0	0	0	0	0	0	0	0	139234	0	0	0	0	0	0	0	0	125678	0	0	216757	0	0
P	6484	176.057	9.4095	C7H5N5O	175.05					0	0	0	0	0	0	0	0	0	0	0	0	0	0	0	0	0	0	0	0	0	0	0	0	0	0	0	0	0	0	0	0	0	0	0	0	0	0	0	0
P	4389	176.058	9.34244	C5H10N3O2P	175.051					0	1521.27	0	0	2692.81	726.063	0	0	0	0	0	0	2110.71	0	0	0	3117.82	1830.27	0	0	0	0	0	0	0	0	64183.7	0	169381	0	1478.46	159197	159380	0	0	0	159769	0	0	0
P	3886	176.06	9.77967	C4H9N5OS	175.052		Gentiana Alkaloid V	C10H9NO2	Alkaloid from Gentiana asclepiadea, Gentiana bulgarica, Gentiana cruciata, Gentiana lutea (yellow gentian) and Gentiana punctata (Gentianaceae)	3410.31	0	0	0	0	1984.05	1277.78	0	0	0	0	4867.44	2110.71	3463.05	0	0	0	1830.27	3125.19	0	0	0	0	0	0	0	179725	0	0	0	172317	0	0	185815	0	0	165152	0	0	328880
P	4891	176.061	9.39298		175.054		2-Benzoxazolol; OH-form, 2-Propenyl ether	C10H9NO2		0	0	0	0	0	0	0	0	0	0	0	0	0	0	0	0	0	0	0	0	0	0	0	0	0	0	0	0	0	0	0	0	0	0	0	180220	0	0	0	0
P	4165	176.062	9.39293	C10H10NP	175.055		3,4-Dihydro-6,7-dihydroxyisoquinoline; Methylene ether	C10H9NO2	Alkaloid from the roots of Stephania rotunda	0	0	0	0	0	0	0	0	0	0	0	0	0	0	0	0	0	0	0	0	0	0	0	0	0	0	0	205208	0	192106	0	0	0	0	0	0	0	0	331337	0
P	3547	176.064	9.40022	CH5N9O2	175.057		Gentianine	C10H9NO2	Alkaloid from Gentiana kirilowii and very many other Gentiana spp., from several Swertia spp. and several other genera in Gentianaceae. Also found in Anthocleista procera, Strychnos angolensis and other Strychnos spp.	0	0	0	0	0	0	0	0	0	0	0	0	0	0	0	0	0	0	0	0	0	0	0	0	0	210741	0	0	0	0	0	0	0	0	193621	0	0	365185	0	0
P	6479	176.065	9.4095	C7H14NPS	175.058		4-Hydroxy-1H-indole-3-carboxaldehyde; Me ether	C10H9NO2	Isol. from the roots of Brassica napus ssp. oleifera (canola) infected with Plasmodiophora brassicae	0	0	0	0	0	0	0	0	0	0	0	0	0	0	0	0	0	0	0	0	0	0	0	0	0	0	0	0	0	0	0	0	0	0	0	0	0	0	0	0
P	4378	176.067	9.35655	C5H9N3O4	175.06		5-Hydroxy-6-methyl-1H-indole-3-carboxaldehyde	C10H9NO2	Alkaloid from the roots of Paeonia albiflora	0	1642.75	0	0	3419.9	1562.14	0	0	0	0	0	0	2859.23	0	0	0	3248.23	1993.53	0	0	0	0	0	0	0	0	104737	0	215623	0	1534.89	207938	209399	0	0	0	204278	0	0	0
P	3862	176.068	9.76656	C6H5N7	175.061		2-Hydroxy-2-phenylacetonitrile; (±)-form, Ac	C10H9NO2		975.624	0	0	0	0	2659.64	2780.71	0	0	0	0	4165.51	2859.23	2041.04	0	0	0	1993.53	2174.71	0	0	0	0	0	0	0	216272	0	0	0	203843	0	0	212869	0	0	210393	0	0	390424
P	4890	176.07	9.39298	C4H10N5OP	175.062		1H-Indole-3-acetic acid	C10H9NO2	Isol. from the marine alga Undaria pinnatifida. Widely distributed in higher plants, also in bacteria, algae, yeasts and fungi	0	0	0	0	0	0	0	0	0	0	0	0	0	0	0	0	0	0	0	0	0	0	0	0	0	0	0	0	0	0	0	0	0	0	0	199804	0	0	0	0
P	4169	176.071	9.39293	C10H9NO2	175.064	1.3764	2,4-Quinolinediol; 2-One-form, N-Me	C10H9NO2	Prod. by Penicillium citrinum strain TPDTF1.4	0	0	0	0	0	0	0	0	0	0	0	0	0	0	0	0	0	0	0	0	0	0	0	0	0	0	0	191295	0	185324	0	0	0	0	0	0	0	0	355030	0
							1H-Indole-2-carboxylic acid; Hydrazide	C9H9N3O
P	3562	176.072	9.40022	C3H9N7S	175.065					0	0	0	0	0	0	0	0	0	0	0	0	0	0	0	0	0	0	0	0	0	0	0	0	0	183499	0	0	0	0	0	0	0	0	173696	0	0	344422	0	0
P	6481	176.074	9.4095	C7H13NO2S	175.066					0	0	0	0	0	0	0	0	0	0	0	0	0	0	0	0	0	0	0	0	0	0	0	0	0	0	0	0	0	0	0	0	0	0	0	0	0	0	0	0
P	4388	176.075	9.25777	C7H15NP2	175.068					0	2809.32	0	0	4387.04	1575.59	0	0	0	0	0	0	2996.21	0	0	0	2234.19	2557.92	0	0	0	0	0	0	0	0	56362.5	0	171296	0	2776.37	165122	167427	0	0	0	155731	0	0	0
P	3899	176.077	9.76658		175.069					3841.09	0	0	0	0	3366.32	2059.06	0	0	0	0	7724.72	2996.21	2832.49	0	0	0	2557.92	4315.32	0	0	0	0	0	0	0	153299	0	0	0	151724	0	0	152085	0	0	163635	0	0	282540
P	4899	176.078	9.39298	C4H9N5O3	175.071					0	0	0	0	0	0	0	0	0	0	0	0	0	0	0	0	0	0	0	0	0	0	0	0	0	0	0	0	0	0	0	0	0	0	0	141611	0	0	0	0
P	4217	176.079	9.39293		175.072					0	0	0	0	0	0	0	0	0	0	0	0	0	0	0	0	0	0	0	0	0	0	0	0	0	0	0	127008	0	123687	0	0	0	0	0	0	0	0	246203	0
P	3628	176.081	9.40022	C3H10N7P	175.073					0	0	0	0	0	0	0	0	0	0	0	0	0	0	0	0	0	0	0	0	0	0	0	0	0	111329	0	0	0	0	0	0	0	0	108890	0	0	223065	0	0
P	6486	176.082	9.4095	C9H9N3O	175.075	1.6669	2-Amino-4-ethylpentanedioic acid	C7H13NO4	Unspecified isomer isol. from Caesalpinia tinctoria seed	0	0	0	0	0	0	0	0	0	0	0	0	0	0	0	0	0	0	0	0	0	0	0	0	0	0	0	0	0	0	0	0	0	0	0	0	0	0	0	0
P	4420	176.084	9.31678	C7H14NO2P	175.076		2-Aminoheptanedioic acid	C7H13NO4	Isol. from Ceratonia siliqua (carob) (abs. config. not detd.)	0	4460.34	0	0	5367.88	1666.4	0	0	0	0	0	0	5030.38	0	0	0	5392.06	3379.56	0	0	0	0	0	0	0	0	34376.7	0	105557	0	2110.12	107789	103429	0	0	0	93087.5	0	0	0
P	3972	176.085	9.77728	C6H13N3OS	175.078		2-Aminoheptanedioic acid; (R)-form	C7H13NO4	Isol. from various Asplenium spp. ferns	3159.86	0	0	0	0	4075.49	1295.14	0	0	0	0	10571.5	5030.38	3443.83	0	0	0	3379.56	5127.76	0	0	0	0	0	0	0	93084	0	0	0	92359.9	0	0	90989.2	0	0	99502.1	0	0	172905
P	4908	176.086	9.39298		175.079		3-Aminoheptanedioic acid	C7H13NO4		0	0	0	0	0	0	0	0	0	0	0	0	0	0	0	0	0	0	0	0	0	0	0	0	0	0	0	0	0	0	0	0	0	0	0	82009.7	0	0	0	0
P	4293	176.088	9.39293		175.08		3-Aminoheptanedioic acid; (±)-form	C7H13NO4		0	0	0	0	0	0	0	0	0	0	0	0	0	0	0	0	0	0	0	0	0	0	0	0	0	0	0	78024.9	0	75354.9	0	0	0	0	0	0	0	0	149712	0
P	3756	176.089	9.40022	C3H9N7O2	175.082		6-Amino-4-(hydroxymethyl)-4-cyclohexene-1,2,3-triol; (1S,2S,3S,6S)-form	C7H13NO4	Prod. by Streptomyces hygroscopicus ssp. limoneus. Also formed by degradn. of Validamycins by soil bacteria	0	0	0	0	0	0	0	0	0	0	0	0	0	0	0	0	0	0	0	0	0	0	0	0	0	65989	0	0	0	0	0	0	0	0	62229.1	0	0	131334	0	0
P	6496	176.091	9.4095		175.083		6-Amino-4-(hydroxymethyl)-4-cyclohexene-1,2,3-triol; (1S,2S,3S,6R)-form	C7H13NO4		0	0	0	0	0	0	0	0	0	0	0	0	0	0	0	0	0	0	0	0	0	0	0	0	0	0	0	0	0	0	0	0	0	0	0	0	0	0	0	0
P	4476	176.092	9.31201	C7H13NO4	175.085	0.800986	4,5-Dihydroxy-2-piperidinecarboxylic acid; (2ξ,4ξ,5ξ)-form, N-Me	C7H13NO4	Isol. from seeds of Pongamia glabra (Leguminosae)	0	2123.21	1230.73	0	4340.66	0	0	0	0	0	0	0	4281.23	0	0	0	2394.86	3306.48	0	0	0	0	0	0	0	0	0	0	61094.2	0	0	65289.6	62475.3	0	0	0	60702.2	0	0	0
P	5862	176.094	9.40923	C8H9N5	175.086					0	0	0	0	0	0	0	0	0	0	0	0	0	0	0	0	0	0	0	0	0	0	0	0	0	0	0	0	0	0	0	0	0	0	0	0	0	0	0	101887
P	5556	176.096	9.41007	C5H13N5S	175.088					0	0	0	0	0	0	0	0	0	0	0	0	0	0	0	0	0	0	0	0	0	0	0	0	0	0	0	0	0	0	0	0	0	0	0	0	0	0	87642	0
P	5267	176.097	9.40689	C5H13N5S	175.09					0	0	0	0	0	0	0	0	0	0	0	0	0	0	0	0	0	0	0	0	0	0	0	0	0	0	0	0	0	0	0	0	0	0	0	0	0	71621.5	0	0
P	3767	176.951	18.5002	C4H2O4P2	175.943		Dithiocarbonic acid; OH-form, O-(2,2,2-Trifluoroethyl) ester	C3H3F3OS2		0	0	0	0	0	0	0	0	0	0	0	0	0	0	0	0	0	0	0	0	0	0	0	0	0	580224	0	0	0	0	0	0	0	0	0	0	0	0	0	0
P	6592	176.952	18.5748	C3HN2O3PS	175.945					0	0	0	0	0	0	0	0	0	0	0	0	0	0	0	0	0	0	0	0	0	0	0	0	0	0	0	0	0	0	0	0	0	0	0	0	0	0	0	0
P	503	176.954	18.5567	C2N4O2S2	175.947					0	738533	1.23691e+06	1.26905e+06	0	0	0	0	0	0	0	0	0	0	0	120989	176864	0	0	0	0	0	0	0	0	0	819138	0	734293	0	606546	0	0	206354	0	0	191924	0	0	0
P	1155	176.956	18.6248	H7N2OP3S	175.949					0	0	0	0	0	1.42711e+06	0	0	0	0	0	1.05604e+06	0	913247	0	0	0	0	0	0	0	0	0	814722	0	0	0	1.19926e+06	0	0	0	0	0	0	0	964819	0	0	0	787645
P	1601	176.958	18.6006	C7N2S2	175.951					0	0	0	0	0	0	1.50734e+06	0	0	1.25499e+06	1.07274e+06	0	0	0	877534	0	0	0	0	685833	866359	0	0	0	0	0	0	0	0	1.17989e+06	0	0	0	0	0	0	0	0	823970	0
P	1989	176.96	18.5865	C5H5OPS2	175.952					0	0	0	0	0	0	0	1.40404e+06	1.47906e+06	0	0	0	0	0	0	0	0	0	0	0	0	877817	829078	0	736758	1.59217e+06	0	0	0	0	0	1.15638e+06	1.28059e+06	0	1.33477e+06	0	0	828462	0	0
P	6576	176.96	18.5998	C3N2O5S	175.953					0	0	0	0	0	0	0	0	0	0	0	0	0	0	0	0	0	0	0	0	0	0	0	0	0	0	0	0	0	0	0	0	0	0	0	0	0	0	0	0
P	342	176.962	18.5606	C2H9OPS3	175.955					0	1.21843e+06	2.42081e+06	2.51329e+06	0	0	0	0	0	0	0	0	0	0	0	1.02627e+06	1.00019e+06	0	0	0	0	0	0	0	0	0	1.73787e+06	0	1.4623e+06	0	1.23308e+06	0	0	653808	0	0	416579	0	0	0
P	1049	176.965	18.6089	CN6OS2	175.957	-1.45361				0	0	0	0	0	2.1904e+06	0	0	0	0	0	1.53061e+06	0	1.27734e+06	0	0	0	968021	0	0	0	0	0	860827	0	0	0	1.79263e+06	0	0	0	0	0	0	0	1.61009e+06	0	0	0	1.07194e+06
P	1522	176.966	18.5986	H8N2OP4	175.959					0	0	0	0	0	0	1.71636e+06	0	0	1.69781e+06	1.7223e+06	0	0	0	1.00954e+06	0	0	0	1.08712e+06	1.24834e+06	1.01934e+06	0	0	0	0	0	0	0	0	1.67923e+06	0	0	0	0	0	0	0	0	1.32859e+06	0
P	1951	176.968	18.5985	C5H4O3S2	175.961					0	0	0	0	0	0	0	1.79075e+06	1.90674e+06	0	0	0	0	0	0	0	0	0	0	0	0	1.12194e+06	1.09281e+06	0	890345	2.11802e+06	0	0	0	0	0	1.42946e+06	1.69268e+06	0	1.69898e+06	0	0	1.02065e+06	0	0
P	6573	176.969	18.5899	C5H6OP2S	175.962					0	0	0	0	0	0	0	0	0	0	0	0	0	0	0	0	0	0	0	0	0	0	0	0	0	0	0	0	0	0	0	0	0	0	0	0	0	0	0	0
P	351	176.971	18.5703	C2H8O3S3	175.964					0	1.5854e+06	2.66589e+06	2.61479e+06	0	0	0	0	0	0	0	0	389087	0	0	1.05119e+06	1.21225e+06	0	0	0	0	0	0	0	0	0	1.87068e+06	0	1.81445e+06	0	1.69785e+06	0	0	1.37277e+06	0	0	1.22541e+06	0	0	0
P	1058	176.974	18.5936	C8HO3P	175.966		2,6-Dichlorophenol; Me ether	C7H6Cl2O		0	0	0	0	0	1.9678e+06	0	0	0	0	0	1.59223e+06	0	1.14486e+06	0	0	0	0	985179	0	0	0	0	870679	0	0	0	1.57536e+06	0	0	0	0	0	0	0	1.03874e+06	0	0	0	0
P	1551	176.975	18.5895	CHN6OPS	175.967		3,5-Dichlorophenol; Me ether	C7H6Cl2O		0	0	0	0	0	0	1.49692e+06	0	0	1.45017e+06	1.47251e+06	0	0	0	778378	0	0	0	0	1.00028e+06	774092	0	0	0	0	0	0	0	0	1.39866e+06	0	0	0	0	0	0	0	0	1.08188e+06	0
P	1996	176.976	18.6004	C7H2N2P2	175.969					0	0	0	0	0	0	0	1.42978e+06	1.53204e+06	0	0	0	0	0	0	0	0	0	0	0	0	796236	810081	0	0	1.74122e+06	0	0	0	0	0	1.22088e+06	1.28448e+06	0	1.18301e+06	0	0	823370	0	0
P	6492	176.978	18.5831	C3N2O7	175.97					0	0	0	0	0	0	0	0	0	0	0	0	0	0	0	0	0	0	0	0	0	0	0	0	0	0	0	0	0	0	0	0	0	0	0	0	0	0	0	0
P	462	176.979	18.5809	CH5O8P	175.972		Bongardine; N-Ac	C10H14N2O	Alkaloid from the tubers of Bongardia chrysogonum	0	1.07103e+06	2.07218e+06	1.82809e+06	0	0	0	0	0	0	0	0	951356	0	0	761221	706300	0	0	0	0	0	0	0	0	0	1.28882e+06	0	1.12143e+06	0	1.21242e+06	0	0	887986	0	0	1.00701e+06	0	0	0
P	1656	176.983	18.5875	C9H4S2	175.976		5-Butyl-2-pyridinecarboxylic acid; Amide	C10H14N2O		0	0	0	0	0	0	1.12988e+06	0	0	907185	891607	0	0	0	0	0	0	0	0	0	0	0	0	0	0	0	0	942400	0	862615	0	0	0	0	0	758026	0	0	0	0
P	2114	176.985	18.5498	C7HN2O2P	175.977					0	0	0	0	0	0	0	868295	937655	0	0	0	0	0	0	0	0	0	0	0	0	0	0	0	0	1.07191e+06	0	0	0	0	0	765723	0	0	0	0	0	0	0	0
P	6585	176.986	18.5583	HN8PS	175.978					0	0	0	0	0	0	0	0	0	0	0	0	0	0	0	0	0	0	0	0	0	0	0	0	0	0	0	0	0	0	0	0	0	0	0	0	0	0	0	0
P	621	176.987	18.5107	CH4O10	175.98	2.97004				0	0	1.15248e+06	955169	0	0	0	0	0	0	0	0	0	0	0	0	0	0	0	0	0	0	0	0	0	0	910434	0	773903	0	0	0	0	0	0	0	0	0	0	0
P	671	176.996	18.5751	C4H4N2O4S	175.989					0	79623.3	713944	158408	23331.3	0	0	0	0	0	0	0	34325.5	0	0	25487.5	39985	0	0	0	0	0	0	0	0	0	127769	0	144421	0	96013.5	0	0	46571.5	0	0	34235.5	0	0	0
P	5375	179.117	9.81552	C10H14N2O	178.11	-2.37131	1,2-Bis(2-methoxyethoxy)ethane	C8H18O4	Prod. by Myxococcus fulvus	0	0	0	0	0	0	0	0	0	0	0	0	0	0	0	0	0	0	0	0	0	0	0	0	0	0	0	0	0	0	0	0	0	0	0	0	0	241690	0	0
P	6257	179.119	9.80989	C8H19O2P	178.112					0	0	0	0	0	0	0	0	0	0	0	0	0	0	0	0	0	0	0	0	0	0	0	0	0	0	0	0	0	0	0	0	0	0	0	0	0	0	0	0
P	4054	179.122	9.87092	H10N12	178.115		(4-Hydroxystyryl)trimethylammonium(1+); (E)-form	C11H16NO	Metab. of the Palauan sponge Axinyssa aplysinoides	0	0	0	0	0	7164.62	4977.63	0	0	0	0	4216.83	6125.59	4504.31	0	0	0	5389.26	4150.87	0	0	0	0	0	0	0	154924	0	0	0	142371	0	0	196592	0	0	154829	0	0	322168
P	4910	179.124	9.80183		178.117					0	0	0	0	0	0	0	0	0	0	0	0	0	0	0	0	0	0	0	0	0	0	0	0	0	0	0	0	0	0	0	0	0	0	0	193934	0	0	358416	0
P	4251	179.126	9.79606	C4H14N6O2	178.118					0	0	0	0	0	0	0	0	0	0	0	0	0	0	0	0	0	0	0	0	0	0	0	0	0	0	0	155030	0	166780	0	0	0	0	0	0	0	406483	0	0
P	3613	179.127	9.80663		178.119					0	0	0	0	0	0	0	0	0	0	0	0	0	0	0	0	0	0	0	0	0	0	0	0	0	208323	0	0	0	0	0	0	0	0	228082	0	0	0	0	0
P	6658	179.128	9.80967	C8H18O4	178.121	0.20366				0	0	0	0	0	0	0	0	0	0	0	0	0	0	0	0	0	0	0	0	0	0	0	0	0	0	0	0	0	0	0	0	0	0	0	0	0	0	0	0
P	4397	179.129	9.53035	C9H14N4	178.122					0	6502.73	11924.1	0	9759.46	0	0	0	0	0	0	0	4889.3	0	0	0	4225.17	4889.98	0	0	0	0	0	0	0	0	0	0	217707	0	0	193609	253525	0	0	0	241699	0	0	0
P	3904	179.131	9.80551	C7H19N2OP	178.123	0.718343				0	0	0	0	0	10359.2	10141.9	0	0	0	0	7452.76	4889.3	5798.09	0	0	0	4889.98	4734.95	0	0	0	0	0	0	0	193260	0	0	0	221806	0	0	270437	0	0	139915	0	0	483755
P	4892	179.132	9.80183	C6H18N4S	178.125		2,5-Diisopropylphenol	C12H18O	Occurs in Spanish origanum oil	0	0	0	0	0	0	0	0	0	0	0	0	0	0	0	0	0	0	0	0	0	0	0	0	0	0	0	0	0	0	0	0	0	0	0	289829	0	0	532125	0
P	4166	179.134	9.79606		178.127		5,7-Dimethyl-2,6,8-decatrien-4-one; (2E,5R,6E,8E)-form	C12H18O	Sex pheromone of Matsucoccus josephi and kairomone of its predator Elatophilus hebraicus	0	0	0	0	0	0	0	0	0	0	0	0	0	0	0	0	0	0	0	0	0	0	0	0	0	0	0	250194	0	230650	0	0	0	0	0	0	0	558506	0	0
P	3546	179.135	9.80329		178.128		2,4-Dodecadiyn-1-ol	C12H18O	Sperm attractant in the eggs of the stony coral Montipora digitata	0	0	0	0	0	0	0	0	0	0	0	0	0	0	0	0	0	0	0	0	0	0	0	0	0	253776	0	0	0	0	0	0	0	0	299969	0	0	0	0	0
P	6656	179.136	9.80967	C3H14N8O	178.129		4,4a,5,6,7,8-Hexahydro-4a,8-dimethyl-2(3H)-naphthalenone; (4aS,8S)-form	C12H18O	Constit. of the oil of Vetiveria zizanioides and metab. of Chondromyces crocatus	0	0	0	0	0	0	0	0	0	0	0	0	0	0	0	0	0	0	0	0	0	0	0	0	0	0	0	0	0	0	0	0	0	0	0	0	0	0	0	0
P	4383	179.138	9.65619		178.13		4,4a,5,6,7,8-Hexahydro-4a,8-dimethyl-2(3H)-naphthalenone; (4aξ,8ξ)-form	C12H18O		0	4463.37	6837.27	0	3393.2	0	0	0	0	0	0	0	8806.65	0	0	0	9810.94	8155.44	0	0	0	0	0	0	0	0	0	0	265919	0	0	275356	307768	0	0	0	265885	0	0	0
P	3872	179.139	9.64257	C7H18N2O3	178.132		7-Isopropyl-5-methylbicyclo[2.2.2]oct-5-en-2-one	C12H18O	Constit. of Angelica archangelica (angelica)	0	0	0	0	0	8015.4	5718.92	0	0	0	0	11026.7	8806.65	4092.41	0	0	0	8155.44	14300.5	0	0	0	0	0	0	0	258944	0	0	0	264704	0	0	390103	0	0	4918.19	0	0	547685
P	4889	179.141	9.80183		178.134		4-Isopropyl-2-methylphenol; Et ether	C12H18O		0	0	0	0	0	0	0	0	0	0	0	0	0	0	0	0	0	0	0	0	0	0	0	0	0	0	0	0	0	0	0	0	0	0	0	268116	0	0	549415	0
P	4163	179.143	9.79606	C12H18O	178.135	-2.68747	Quinceoxepine	C12H18O	Constit. of quince fruit (Cydonia oblonga)	0	0	0	0	0	0	0	0	0	0	0	0	0	0	0	0	0	0	0	0	0	0	0	0	0	0	0	238082	0	231955	0	0	0	0	0	0	0	505081	0	0
P	3549	179.144	9.80329	C12H18O	178.136		Butyltrimethylpyrazine	C11H18N2	Isol. from Corynebacterium glutamicum	0	0	0	0	0	0	0	0	0	0	0	0	0	0	0	0	0	0	0	0	0	0	0	0	0	259665	0	0	0	0	0	0	0	0	249321	0	0	0	0	0
P	6657	179.145	9.80967		178.138		2,5-Dimethyl-3-(2-methylbutyl)pyrazine	C11H18N2	Prod. by the marine bacterium Sulfitobacter pontiacus	0	0	0	0	0	0	0	0	0	0	0	0	0	0	0	0	0	0	0	0	0	0	0	0	0	0	0	0	0	0	0	0	0	0	0	0	0	0	0	0
P	4387	179.146	9.67285	C9H22OS	178.139		3,5-Dimethyl-2-pentylpyrazine	C11H18N2	Constit. of the glands of various ants incl. Brachyponera sp. and Streblognathus sp.	0	4312.93	10037.1	0	9227.59	0	0	0	0	0	0	0	4086.7	0	0	0	8294.99	6145.12	0	0	0	0	0	0	0	0	0	0	217223	0	0	226896	268499	0	0	0	205968	0	0	0
P	3903	179.148	9.59511	C2H14N10	178.14		2-Isopropyl-5-(1-methylpropyl)pyrazine	C11H18N2	Prod. by Chondromyces crocatus and Paenibacillus polymyxa	0	0	0	0	0	11859.4	3178.64	0	0	0	0	7384.03	4086.7	5708.88	0	0	0	2198.72	5806.47	0	0	0	0	0	0	0	189111	0	0	0	396042	0	0	197397	0	0	4813.75	0	0	417983
P	4896	179.149	9.80183	C6H18N4O2	178.142					0	0	0	0	0	0	0	0	0	0	0	0	0	0	0	0	0	0	0	0	0	0	0	0	0	0	0	0	0	0	0	0	0	0	0	184512	0	0	382398	0
P	4206	179.151	9.79606	C6H18N4O2	178.144					0	0	0	0	0	0	0	0	0	0	0	0	0	0	0	0	0	0	0	0	0	0	0	0	0	0	0	179924	0	253361	0	0	0	0	0	0	0	341021	0	0
P	3603	179.152	9.80329		178.145					0	0	0	0	0	0	0	0	0	0	0	0	0	0	0	0	0	0	0	0	0	0	0	0	0	155780	0	0	0	0	0	0	0	0	135520	0	0	0	0	0
P	6659	179.153	9.80967	C11H18N2	178.146					0	0	0	0	0	0	0	0	0	0	0	0	0	0	0	0	0	0	0	0	0	0	0	0	0	0	0	0	0	0	0	0	0	0	0	0	0	0	0	0
P	4414	179.155	9.68498	C11H18N2	178.147	2.21672				0	3376.77	4089.53	0	6769.35	0	0	0	0	0	0	0	6583.54	0	0	0	11026.8	6625.38	0	0	0	0	0	0	0	0	0	0	204894	0	0	162396	153784	0	0	0	115062	0	0	0
P	3970	179.156	9.86708	C9H23OP	178.149					0	0	0	0	0	7966.72	6613.45	0	0	0	0	8013.22	6583.54	4644.87	0	0	0	9717.09	10394.8	0	0	0	0	0	0	0	141471	0	0	0	192526	0	0	101954	0	0	7751.12	0	0	250751
P	4903	179.158	9.80183	C8H22N2S	178.151					0	0	0	0	0	0	0	0	0	0	0	0	0	0	0	0	0	0	0	0	0	0	0	0	0	0	0	0	0	0	0	0	0	0	0	102826	0	0	229799	0
P	4273	179.16	9.79884		178.152					0	0	0	0	0	0	0	0	0	0	0	0	0	0	0	0	0	0	0	0	0	0	0	0	0	0	0	326921	0	131960	0	0	0	0	0	0	0	197836	0	0
P	3678	179.161	9.80329	C5H18N6O	178.154					0	0	0	0	0	0	0	0	0	0	0	0	0	0	0	0	0	0	0	0	0	0	0	0	0	226882	0	0	0	0	0	0	0	0	80432.9	0	0	0	0	0
P	6661	179.162	9.80967	C5H18N6O	178.155					0	0	0	0	0	0	0	0	0	0	0	0	0	0	0	0	0	0	0	0	0	0	0	0	0	0	0	0	0	0	0	0	0	0	0	0	0	0	0	0
P	4458	179.163	9.68044	C9H22O3	178.156					0	2804.01	3082.93	0	2243.44	0	0	0	0	0	0	0	2607.13	0	0	0	3167.14	4287.5	0	0	0	0	0	0	0	0	0	0	115822	0	0	95270.5	82768.5	0	0	0	67295.3	0	0	0
P	4063	179.165	9.87734	C9H22O3	178.157		Benzeneethanethioic acid; OH-form, Dimethylamide	C10H13NS		0	0	0	0	0	2644.31	4001.93	0	0	0	0	3404.04	2607.13	2331.27	0	0	0	4287.5	2396.67	0	0	0	0	0	0	0	151969	0	0	0	159230	0	0	63392.1	0	0	72346.2	0	0	153241
P	5479	179.167	9.81037	C8H23N2P	178.16					0	0	0	0	0	0	0	0	0	0	0	0	0	0	0	0	0	0	0	0	0	0	0	0	0	0	0	0	0	0	0	0	0	0	0	0	0	0	137794	0
P	5164	179.169	9.81553		178.161		Benzeneethanethioic acid; OH-form, Dimethylamide	C10H13NS		0	0	0	0	0	0	0	0	0	0	0	0	0	0	0	0	0	0	0	0	0	0	0	0	0	0	0	0	0	0	0	0	0	0	0	0	0	114206	0	0
P	6296	179.17	9.80989		178.163					0	0	0	0	0	0	0	0	0	0	0	0	0	0	0	0	0	0	0	0	0	0	0	0	0	0	0	0	0	0	0	0	0	0	0	0	0	0	0	0
P	5992	179.173	9.81787	C4H18N8	178.166					0	0	0	0	0	0	0	0	0	0	0	0	0	0	0	0	0	0	0	0	0	0	0	0	0	0	0	0	0	0	0	0	0	0	0	0	0	0	0	94688.7
P	5707	179.175	9.81037	C8H22N2O2	178.168					0	0	0	0	0	0	0	0	0	0	0	0	0	0	0	0	0	0	0	0	0	0	0	0	0	0	0	0	0	0	0	0	0	0	0	0	0	0	74672	0
P	6521	180.082	8.33658	C5H15N3P2	179.075		6-Amino-1,2,3,4,5-cyclohexanepentol	C6H13NO5		0	0	0	0	0	0	0	0	0	0	0	0	0	0	0	0	0	0	0	0	0	0	0	0	0	0	0	0	0	0	0	0	0	0	0	0	0	0	0	0
P	3730	180.082	11.5906	C5H15N3P2	179.075		6-Amino-1,2,3,4,5-cyclohexanepentol; (1α,2β,3α,4β,5α,6β)-form	C6H13NO5	Present in alfalfa nodules (Medicago sativa)	0	0	0	0	0	0	0	0	0	0	0	0	0	0	0	0	0	0	0	0	0	0	0	0	0	82788.6	0	0	0	0	0	0	0	0	84316.3	0	0	0	0	0
P	399	180.084	8.32798	C2H9N7O3	179.077	-1.59618	1-Amino-1-deoxyfructose; α-D-Furanose-form	C6H13NO5		0	117061	103999	109298	120828	0	0	0	0	0	0	0	0	0	0	0	0	0	0	0	0	0	0	0	0	0	0	0	0	0	0	0	0	0	0	0	0	0	0	0
P	4446	180.084	11.5812	C2H9N7O3	179.077	-0.98552	2-Amino-2-deoxygalactose; D-form	C6H13NO5	Widespread in nature, found in many mucopolysaccharides (e.g. chondroitin sulfate from tendons, tracheae, nasal septa), glycoproteins, glycolipids, fungi, bacteria, antibiotics and uridine diphosphate complexes	0	0	0	0	0	0	0	0	0	0	0	0	0	0	0	0	0	0	0	0	0	0	0	0	0	0	0	0	94244.9	0	0	96101.5	110205	0	0	0	0	0	0	0
P	1147	180.086	8.35961	C6H13NO5	179.078		2-Amino-2-deoxygalactose; β-D-Furanose-form	C6H13NO5		0	0	0	0	115478	141358	0	0	0	0	0	0	115192	38968.5	0	0	0	26967.1	0	0	0	0	0	0	0	0	74676.2	0	65352.7	0	67267.4	68613.1	78206	4061.89	0	0	70965.4	0	0	121441
P	3967	180.086	11.6539	C6H13NO5	179.079		5-Amino-5-deoxygalactose; D-Pyranose-form	C6H13NO5		0	0	0	0	0	3471.08	0	0	0	0	0	0	2680.68	8734.1	0	0	0	4961.89	0	0	0	0	0	0	0	0	113832	0	0	0	115413	0	0	118621	0	0	103972	0	0	123722
P	1596	180.087	8.32805	C6H13NO5	179.079	-0.183228	5-Amino-5-deoxygalactose; D-form	C6H13NO5	Isol. from Streptomyces lydicus	0	0	0	0	0	0	143636	0	0	0	0	136443	0	0	0	0	0	0	0	0	0	0	0	0	0	0	66943.2	0	0	0	0	0	0	125382	0	0	0	0	0	116111
P	4900	180.087	11.603	CH10N9P	179.08	1.72683	5-Amino-5-deoxyglucose; D-Pyranose-form	C6H13NO5	Prod. by Streptomyces nojiriensis, Streptomyces lavendulae and Streptomyces ficellus	0	0	0	0	0	0	0	0	0	0	0	0	0	0	0	0	0	0	0	0	0	0	0	0	0	0	0	0	0	0	0	0	0	0	0	136817	0	0	0	0
P	1993	180.088	8.33193	C7H9N5O	179.081	1.30452	Guanine; 2-N,N-Di-Me	C7H9N5O	Isol. from RNA of various plants	0	0	0	0	0	0	0	164488	0	145987	148923	0	0	0	0	0	0	0	0	0	0	0	0	0	0	0	0	0	0	0	0	0	0	0	0	91474.5	0	0	132676	0
P	4218	180.089	11.5878	C5H14N3O2P	179.082					0	0	0	0	0	0	0	0	0	0	0	0	0	0	0	0	0	0	0	0	0	0	0	0	0	0	0	151687	0	148769	0	0	0	0	0	0	0	174662	136646	0
P	2369	180.09	8.3317	C5H14N3O2P	179.083					0	0	0	0	0	0	0	0	175266	0	0	0	0	0	0	0	0	0	0	0	0	0	0	0	0	0	0	83351.8	0	79917.6	0	0	0	0	0	0	0	161597	0	0
P	3580	180.091	11.6019	C4H13N5OS	179.083					0	0	0	0	0	0	0	0	0	0	0	0	0	0	0	0	0	0	0	0	0	0	0	0	0	177947	0	0	0	0	0	0	0	0	174243	0	0	0	0	0
P	3666	180.091	8.32544	C4H13N5OS	179.084					0	0	0	0	0	0	0	0	0	0	0	0	0	0	0	0	0	0	0	0	0	0	0	0	0	98332.9	0	0	0	0	0	0	0	0	104220	0	0	0	0	0
P	4394	180.093	11.5845		179.085					0	0	0	0	0	0	0	0	0	0	0	0	0	0	0	0	0	0	0	0	0	0	0	0	0	0	0	0	177308	0	0	195560	202103	0	0	0	0	0	0	0
P	274	180.093	8.3252		179.085					0	203436	210043	207293	214363	0	0	0	0	0	0	0	0	0	0	0	0	0	0	0	0	0	0	0	0	0	0	0	0	0	0	0	0	0	0	0	0	0	0	0
P	1044	180.094	8.36311	C10H14NP	179.087					0	200721	0	0	206809	247950	0	0	0	0	0	0	209733	55356.4	0	0	0	55155	0	0	0	0	0	0	0	0	13374.3	0	104725	0	117615	160043	129926	0	0	0	110531	0	0	40555
P	3894	180.094	11.6289	C10H14NP	179.087					0	0	0	0	0	6322.76	0	0	0	0	0	0	8160.51	6540.95	0	0	0	8057.49	0	0	0	0	0	0	0	0	200297	0	0	0	199495	0	0	201299	0	0	188286	0	0	195495
P	1514	180.095	8.3229	CH9N9O2	179.088					0	0	0	0	0	0	216457	0	0	0	0	208023	0	0	0	0	0	0	0	0	0	0	0	0	0	0	107341	0	0	0	113436	0	0	127489	0	0	0	0	0	180360
P	4894	180.095	11.603	CH9N9O2	179.088					0	0	0	0	0	0	0	0	0	0	0	0	0	0	0	0	0	0	0	0	0	0	0	0	0	0	0	0	0	0	0	0	0	0	0	206508	0	0	0	0
P	1931	180.097	8.33193	C7H18NPS	179.089					0	0	0	0	0	0	0	216183	0	231371	209675	0	0	0	0	0	0	0	0	0	0	0	0	0	0	0	0	0	0	0	0	0	0	0	0	119919	0	0	179813	0
P	4184	180.098	11.5878	C5H13N3O4	179.09					0	0	0	0	0	0	0	0	0	0	0	0	0	0	0	0	0	0	0	0	0	0	0	0	0	0	0	196374	0	212022	0	0	0	0	0	0	0	196657	189415	0
P	2333	180.098	8.3317	C5H13N3O4	179.091					0	0	0	0	0	0	0	0	217006	0	0	0	0	0	0	0	0	0	0	0	0	0	0	0	0	0	0	105023	0	110552	0	0	0	0	0	0	0	191993	0	0
P	3564	180.099	11.6019	C6H9N7	179.092					0	0	0	0	0	0	0	0	0	0	0	0	0	0	0	0	0	0	0	0	0	0	0	0	0	208996	0	0	0	0	0	0	0	0	201370	0	0	0	0	0
P	3644	180.1	8.32544	C6H9N7	179.092					0	0	0	0	0	0	0	0	0	0	0	0	0	0	0	0	0	0	0	0	0	0	0	0	0	112158	0	0	0	0	0	0	0	0	118263	0	0	0	0	0
P	4391	180.101	11.5845	C4H14N5OP	179.094					0	0	0	0	0	0	0	0	0	0	0	0	0	0	0	0	0	0	0	0	0	0	0	0	0	0	0	0	196052	0	0	210972	205504	0	0	0	0	0	0	0
P	278	180.101	8.3252	C4H14N5OP	179.094					0	196661	224041	211089	214952	0	0	0	0	0	0	0	0	0	0	0	0	0	0	0	0	0	0	0	0	0	0	0	0	0	0	0	0	0	0	0	0	0	0	0
P	1055	180.103	8.35954	C3H13N7S	179.095					0	198367	0	0	213085	230801	0	0	0	0	0	0	203848	51286.1	0	0	0	45167	0	0	0	0	0	0	0	0	12715.2	0	113007	0	114583	127169	116681	0	0	0	97696.9	0	0	173095
P	3901	180.103	11.5889	C3H13N7S	179.096					0	0	0	0	0	5568.41	0	0	0	0	0	0	5411.9	9424.82	0	0	0	4147.56	0	0	0	0	0	0	0	0	186767	0	0	0	215078	0	0	175715	0	0	171769	0	0	188027
P	1533	180.104	8.3229		179.096					0	0	0	0	0	0	188530	0	0	0	0	184296	0	0	0	0	0	0	0	0	0	0	0	0	0	0	94179.1	0	0	0	134067	0	0	99149.5	0	0	0	0	0	166197
P	4898	180.104	11.603		179.097					0	0	0	0	0	0	0	0	0	0	0	0	0	0	0	0	0	0	0	0	0	0	0	0	0	0	0	0	0	0	0	0	0	0	0	164553	0	0	0	0
P	1976	180.105	8.33193	C7H17NO2S	179.098					0	0	0	0	0	0	0	179911	0	168700	179485	0	0	0	0	0	0	0	0	0	0	0	0	0	0	0	0	0	0	0	0	0	0	0	0	91303.4	0	0	153927	0
P	4210	180.106	11.5878	H9N11O	179.099					0	0	0	0	0	0	0	0	0	0	0	0	0	0	0	0	0	0	0	0	0	0	0	0	0	0	0	180254	0	203053	0	0	0	0	0	0	0	154476	161131	0
P	2358	180.107	8.3317	C7H19NP2	179.1					0	0	0	0	0	0	0	0	174969	0	0	0	0	0	0	0	0	0	0	0	0	0	0	0	0	0	0	87915.4	0	94714.7	0	0	0	0	0	0	0	152551	0	0
P	3612	180.108	11.6019		179.1					0	0	0	0	0	0	0	0	0	0	0	0	0	0	0	0	0	0	0	0	0	0	0	0	0	147585	0	0	0	0	0	0	0	0	143008	0	0	0	0	0
P	3713	180.108	8.32544	C4H13N5O3	179.101					0	0	0	0	0	0	0	0	0	0	0	0	0	0	0	0	0	0	0	0	0	0	0	0	0	80336.5	0	0	0	0	0	0	0	0	78689.1	0	0	0	0	0
P	4421	180.11	11.5845	C4H13N5O3	179.102					0	0	0	0	0	0	0	0	0	0	0	0	0	0	0	0	0	0	0	0	0	0	0	0	0	0	0	0	162138	0	0	145344	131242	0	0	0	0	0	0	0
P	365	180.11	8.3252	C4H13N5O3	179.102					0	128214	154232	148561	139204	0	0	0	0	0	0	0	0	0	0	0	0	0	0	0	0	0	0	0	0	0	0	0	0	0	0	0	0	0	0	0	0	0	0	0
P	1144	180.111	8.32375	C3H14N7P	179.104					0	0	0	0	142564	132391	0	0	0	0	0	0	129421	32206.4	0	0	0	31612.5	0	0	0	0	0	0	0	0	73064.3	0	96293.5	0	96278.2	82420.3	81037.2	0	0	0	64173.7	0	0	115041
P	3957	180.111	11.6089	C3H14N7P	179.104					0	0	0	0	0	2611.69	0	0	0	0	0	0	7141.53	8389.15	0	0	0	1900.9	0	0	0	0	0	0	0	0	132181	0	0	0	145139	0	0	106848	0	0	116353	0	0	124025
P	1633	180.112	8.33359	C3H14N7P	179.105					0	0	0	0	0	0	118582	0	0	0	0	112004	0	0	0	0	0	0	0	0	0	0	0	0	0	0	0	0	0	0	0	0	0	0	0	0	0	0	0	109325
P	4904	180.113	11.603	C3H14N7P	179.105					0	0	0	0	0	0	0	0	0	0	0	0	0	0	0	0	0	0	0	0	0	0	0	0	0	0	0	0	0	0	0	0	0	0	0	102683	0	0	0	0
P	2081	180.114	8.33352	C7H18NO2P	179.107					0	0	0	0	0	0	0	105756	0	99781.4	112892	0	0	0	0	0	0	0	0	0	0	0	0	0	0	0	0	0	0	0	0	0	0	0	0	0	0	0	96313.2	0
P	4279	180.115	11.5878	C7H18NO2P	179.107					0	0	0	0	0	0	0	0	0	0	0	0	0	0	0	0	0	0	0	0	0	0	0	0	0	0	0	124559	0	132827	0	0	0	0	0	0	0	93869.5	101588	0
P	2434	180.116	8.33974	C7H18NO2P	179.108					0	0	0	0	0	0	0	0	109153	0	0	0	0	0	0	0	0	0	0	0	0	0	0	0	0	0	0	0	0	0	0	0	0	0	0	0	0	93966.9	0	0
P	3697	180.116	11.6019	C6H17N3OS	179.109					0	0	0	0	0	0	0	0	0	0	0	0	0	0	0	0	0	0	0	0	0	0	0	0	0	110709	0	0	0	0	0	0	0	0	84871.8	0	0	0	0	0
P	6517	180.117	8.33367	C6H17N3OS	179.11					0	0	0	0	0	0	0	0	0	0	0	0	0	0	0	0	0	0	0	0	0	0	0	0	0	0	0	0	0	0	0	0	0	0	0	0	0	0	0	0
P	4470	180.118	11.5845		179.111					0	0	0	0	0	0	0	0	0	0	0	0	0	0	0	0	0	0	0	0	0	0	0	0	0	0	0	0	93071.4	0	0	88133.7	73045.2	0	0	0	0	0	0	0
P	522	180.118	8.3252		179.111					0	69811.6	88995.6	80052.1	79860.2	0	0	0	0	0	0	0	0	0	0	0	0	0	0	0	0	0	0	0	0	0	0	0	0	0	0	0	0	0	0	0	0	0	0	0
P	4067	180.12	11.5705	C3H13N7O2	179.113					0	0	0	0	0	3102.77	0	0	0	0	0	0	3809.82	3205.91	0	0	0	5293.86	0	0	0	0	0	0	0	0	113432	0	0	0	80717.2	0	0	70396.8	0	0	76957.7	0	0	73857.5
P	1297	180.12	8.32381	C3H13N7O2	179.113					0	0	0	0	0	73676.2	0	0	0	0	0	0	72672.3	18468.1	0	0	0	22425.1	19904.4	0	0	0	0	0	0	0	48881.4	0	52974.2	0	50149.8	48896.1	43935.1	38914.7	0	0	44424.5	0	0	67137.2
P	6719	180.138	9.81012	C5H18N5P	179.13		Herbipoline	C7H10N5O	Isol. from the giant silicious sponge Geodia gigas	0	0	0	0	0	0	0	0	0	0	0	0	0	0	0	0	0	0	0	0	0	0	0	0	0	0	0	0	0	0	0	0	0	0	0	0	0	0	0	0
P	5705	180.14	9.81037		179.132					0	0	0	0	0	0	0	0	0	0	0	0	0	0	0	0	0	0	0	0	0	0	0	0	0	0	0	0	0	0	0	0	0	0	0	0	0	0	82658.9	0
P	5310	180.141	9.81831	C8H21NOS	179.134					0	0	0	0	0	0	0	0	0	0	0	0	0	0	0	0	0	0	0	0	0	0	0	0	0	0	0	0	0	0	0	0	0	0	0	0	0	97784.3	0	0
P	6417	180.143	9.80989	CH13N11	179.136					0	0	0	0	0	0	0	0	0	0	0	0	0	0	0	0	0	0	0	0	0	0	0	0	0	0	0	0	0	0	0	0	0	0	0	0	0	0	0	0
P	6066	180.146	9.80952	C5H17N5O2	179.139					0	0	0	0	0	0	0	0	0	0	0	0	0	0	0	0	0	0	0	0	0	0	0	0	0	0	0	0	0	0	0	0	0	0	0	0	0	0	0	80111.6
P	6461	181.085	2.47132	C4H13N4O2P	180.078					0	0	0	0	0	0	0	0	0	0	0	0	0	0	0	0	0	0	0	0	0	0	0	0	0	0	0	0	0	0	0	0	0	0	0	0	0	0	0	0
P	5353	181.091	3.93883	C7H18OP2	180.084					0	0	0	0	0	0	0	0	0	0	0	0	0	0	0	0	0	0	0	0	0	0	0	0	0	0	0	0	0	0	0	0	0	0	0	0	0	270379	0	0
P	6328	181.093	2.47132	C4H12N4O4	180.086					0	0	0	0	0	0	0	0	0	0	0	0	0	0	0	0	0	0	0	0	0	0	0	0	0	0	0	0	0	0	0	0	0	0	0	0	0	0	0	0
P	6054	181.096	3.91191	C3H13N6OP	180.089	0.553232				0	0	0	0	0	77023.1	88116.7	0	0	0	0	29177.3	66446	145157	30382.3	0	0	0	116869	0	0	0	0	0	0	0	51787.2	0	21506.3	0	102760	79351.2	93584.7	0	0	0	127604	0	0	256142
P	6475	181.102	2.47132	C6H18N2P2	180.095					0	0	0	0	0	0	0	0	0	0	0	0	0	0	0	0	0	0	0	0	0	0	0	0	0	0	0	0	0	0	0	0	0	0	0	0	0	0	0	0
P	3680	181.109	10.0687	C8H12N4O	180.102		Benzaldehyde; Di-Et acetal	C11H16O2		0	0	0	0	0	0	0	0	0	0	0	0	0	0	0	0	0	0	0	0	0	0	0	0	0	102155	0	0	0	0	0	0	0	0	79396.1	0	0	0	0	0
P	4417	181.111	9.7388	[M+NH3] 17.0265 m/z adduct of 164.0849 m/z	180.104		5-(3-Butenyl)dihydro-3-(1-propenyl)-2(5H)-furanone; (1'E,3R,5R)-form	C11H16O2	Prod. by Galiella rufa, Strumella coryneoidea and ascomycete A111-95	0	8088.99	0	0	23276.2	0	0	0	0	0	0	0	8331.35	0	0	0	6232.76	5918.21	0	0	0	0	0	0	0	0	0	0	123553	0	0	116041	119603	0	0	0	127059	0	0	0
P	3910	181.113	9.70575	C5H16N4OS	180.105		2,4,6-Decatrienoic acid; (2E,4E,6Z)-form, Me ester	C11H16O2	Aggregation pheromone of Plautia stali	0	0	0	0	0	10328.6	4616.99	0	0	0	0	12957.3	12850.4	18518.8	0	0	0	9435.09	13995	0	0	0	0	0	0	0	162603	0	741.741	0	153210	0	0	172031	0	0	3266.26	0	0	12516.7
P	4895	181.114	10.0935	C11H17P	180.107		2,4,7-Decatrienoic acid; (2E,4E,7Z)-form, Me ester	C11H16O2	Constit. of the marine green alga Cladophora columbiana	0	0	0	0	0	0	0	0	0	0	0	0	0	0	0	0	0	0	0	0	0	0	0	0	0	0	0	0	0	0	0	0	0	0	0	183112	0	0	0	0
P	4162	181.116	10.0599	C2H12N8O2	180.109		3,4-Dimethyl-5-pentylidene-2(5H)-furanone; (Z)-form	C11H16O2	Constit. of tobacco, butter and peppermint oil	0	0	0	0	0	0	0	0	0	0	0	0	0	0	0	0	0	0	0	0	0	0	0	0	0	0	0	232467	0	235441	0	0	0	0	0	0	0	0	0	0
P	3519	181.117	10.0687	C8H21PS	180.11		6-Ethyl-3-(2-methylpropyl)-2H-pyran-2-one	C11H16O2	Metab. of Streptomyces spp.	0	0	0	0	0	0	0	0	0	0	0	0	0	0	0	0	0	0	0	0	0	0	0	0	0	289866	0	0	0	0	0	0	0	0	260910	0	0	0	0	0
P	4362	181.12	9.62391	C7H12N6	180.113		Hamavellone A; 2-Epimer	C11H16O2	Isol. from Hamigera avellanea BCC 17816	0	13739.2	0	0	46429	0	0	0	0	0	0	0	12387.1	0	0	0	19443	14132.7	0	0	0	0	0	0	0	0	0	0	338831	0	0	346385	327048	0	0	0	372240	0	0	0
P	3818	181.121	10.0655	C5H17N4OP	180.114		5-(3,6-Heptadienyl)dihydro-2(3H)-furanone; (±)-(E)-form	C11H16O2		0	0	0	0	0	0	0	0	0	0	0	0	0	0	0	0	0	0	0	0	0	0	0	0	0	0	392024	0	0	0	373622	0	0	383362	0	0	0	0	0	0
P	4882	181.123	10.0935	C11H16O2	180.115	1.82266	3-(1-Hexenyl)-5-methyl-2(5H)-furanone; (S)-(Z)-form	C11H16O2	Prod. by Pseudomonas aureofaciens strain 63-28	0	0	0	0	0	0	0	0	0	0	0	0	0	0	0	0	0	0	0	0	0	0	0	0	0	0	0	0	0	0	0	0	0	0	0	441842	0	0	0	0
P	4113	181.124	10.0599		180.117					0	0	0	0	0	0	0	0	0	0	0	0	0	0	0	0	0	0	0	0	0	0	0	0	0	0	0	441231	0	431494	0	0	0	0	0	0	0	0	0	0
P	5342	181.125	7.80854	C8H20O2S	180.118					0	0	0	0	0	0	0	0	0	0	0	0	0	0	0	0	0	0	0	0	0	0	0	0	0	0	0	0	0	0	0	0	0	0	0	0	0	77419.3	0	0
P	3484	181.126	10.0687	C8H20O2S	180.119					0	0	0	0	0	0	0	0	0	0	0	0	0	0	0	0	0	0	0	0	0	0	0	0	0	482885	0	0	0	0	0	0	0	0	490591	0	0	0	0	0
P	6420	181.127	7.79726	C8H22P2	180.12					0	0	0	0	0	0	0	0	0	0	0	0	0	0	0	0	0	0	0	0	0	0	0	0	0	0	0	0	0	0	0	0	0	0	0	0	0	0	0	0
P	6676	181.127	12.7952	C8H22P2	180.12		2,6-Diisopropylpyrazine; α-Hydroxy	C10H16N2O	Prod. by Chondromyces crocatus	0	0	0	0	0	0	0	0	0	0	0	0	0	0	0	0	0	0	0	0	0	0	0	0	0	0	0	0	0	0	0	0	0	0	0	0	0	0	0	0
P	4352	181.129	9.62391	C5H16N4O3	180.121		3-Methoxy-2-methyl-5-(1-methylpropyl)pyrazine; (ξ)-form	C10H16N2O	Prod. by Chondromyces crocatus	0	16404	0	0	55120.8	0	0	0	0	0	0	0	17684.9	0	0	0	23034.3	15967.7	0	0	0	0	0	0	0	0	0	0	462672	0	0	493891	489498	0	0	0	443287	0	0	0
P	6063	181.13	7.79239	C5H16N4O3	180.123		Smipine	C10H16N2O	Alkaloid from Lupinus formosus (Leguminosae)	0	0	0	0	0	51580.8	58846.3	0	0	0	0	54555.3	42669.7	70123.6	0	0	0	71031.8	59731.4	0	0	0	0	0	0	0	58070.7	0	56211.2	0	62683.9	62356.6	62086.4	64192.6	0	0	52871.7	0	0	86415.4
P	3805	181.13	9.69503	[M+NH3] 17.0265 m/z adduct of 164.1041 m/z	180.123					0	0	0	0	0	31493.4	14784.7	0	0	0	0	24630	25680.5	26782.6	0	0	0	28280.9	27348	0	0	0	0	0	0	0	503730	0	2276.7	0	527429	0	0	471589	0	0	15723.6	0	0	24965.9
P	6073	181.13	12.7868	C5H16N4O3	180.123					0	0	0	0	0	0	0	0	0	0	0	0	0	0	0	0	0	0	0	0	0	0	0	0	0	0	0	0	0	0	0	0	0	0	0	0	0	0	0	80290.3
P	4879	181.131	10.0935		180.124					0	0	0	0	0	0	0	0	0	0	0	0	0	0	0	0	0	0	0	0	0	0	0	0	0	0	0	0	0	0	0	0	0	0	0	443273	0	0	0	0
P	5671	181.132	7.80885	C4H17N6P	180.125					0	0	0	0	0	0	0	0	0	0	0	0	0	0	0	0	0	0	0	0	0	0	0	0	0	0	0	0	0	0	0	0	0	0	0	0	0	0	92585.8	0
P	4110	181.133	10.0599	C4H17N6P	180.126					0	0	0	0	0	0	0	0	0	0	0	0	0	0	0	0	0	0	0	0	0	0	0	0	0	0	0	437544	0	486789	0	0	0	0	0	0	0	0	0	0
P	5345	181.134	7.80854	C10H16N2O	180.126	1.01785	Hordenine; N-Me	C11H18NO	Quaternary alkaloid from Trichocereus candicans, Trichocereus lamprochlorus, Trichocereus spachianus, several Desmodium spp. (Cactaceae, Leguminosae) and several other spp. in different families. Also from mescal (Lophophora williamsii)	0	0	0	0	0	0	0	0	0	0	0	0	0	0	0	0	0	0	0	0	0	0	0	0	0	0	0	0	0	0	0	0	0	0	0	0	0	74354.5	0	0
P	3491	181.135	10.0687	C8H21O2P	180.127					0	0	0	0	0	0	0	0	0	0	0	0	0	0	0	0	0	0	0	0	0	0	0	0	0	420941	0	0	0	0	0	0	0	0	413207	0	0	0	0	0
P	4358	181.137	9.62021	C7H20N2OS	180.13					0	16196.3	0	0	43968.6	0	0	0	0	0	0	0	14712.4	0	0	0	15527.6	13490.4	0	0	0	0	0	0	0	0	0	0	407534	0	0	393675	413808	0	0	0	357192	0	0	0
P	3829	181.138	9.726	[M+NH3] 17.0265 m/z adduct of 164.1122 m/z	180.131					0	0	0	0	0	20569.4	9630.47	0	0	0	0	19002.6	21440.4	23346.4	0	0	0	23958.4	21763.6	0	0	0	0	0	0	0	359920	0	2574.98	0	390319	0	0	325684	0	0	13562.4	0	0	16787.1
P	4884	181.14	10.0935	C4H16N6O2	180.133					0	0	0	0	0	0	0	0	0	0	0	0	0	0	0	0	0	0	0	0	0	0	0	0	0	0	0	0	0	0	0	0	0	0	0	320966	0	0	0	0
P	4134	181.142	10.0599	C4H16N6O2	180.134					0	0	0	0	0	0	0	0	0	0	0	0	0	0	0	0	0	0	0	0	0	0	0	0	0	0	0	348898	0	323740	0	0	0	0	0	0	0	0	0	0
P	3527	181.143	10.0687	C8H20O4	180.136					0	0	0	0	0	0	0	0	0	0	0	0	0	0	0	0	0	0	0	0	0	0	0	0	0	262254	0	0	0	0	0	0	0	0	268009	0	0	0	0	0
P	4381	181.146	9.67394	C7H21N2OP	180.138	-2.27303				0	8724.17	0	0	27842.9	0	0	0	0	0	0	0	8153.48	0	0	0	15789.2	11166.7	0	0	0	0	0	0	0	0	0	0	242710	0	0	248434	224682	0	0	0	217505	0	0	0
P	3866	181.147	10.0655	C7H21N2OP	180.14		2,4-Dodecadienal; (2E,4Z)-form	C12H20O	Found in fruit peels of Citrus spp.	0	0	0	0	0	0	0	0	0	0	0	0	0	0	0	0	0	0	0	0	0	0	0	0	0	0	235261	0	0	0	231501	0	0	191474	0	0	0	0	0	0
P	4893	181.148	10.0935	C6H20N4S	180.141		5,7-Dodecadienal; (5Z,7Z)-form	C12H20O		0	0	0	0	0	0	0	0	0	0	0	0	0	0	0	0	0	0	0	0	0	0	0	0	0	0	0	0	0	0	0	0	0	0	0	192924	0	0	0	0
P	4185	181.15	10.0599		180.143		5,7-Dodecadienal; (5E,7Z)-form	C12H20O	Pheromone of western tent caterpillar Malacosoma californicum and Malacosoma neustria	0	0	0	0	0	0	0	0	0	0	0	0	0	0	0	0	0	0	0	0	0	0	0	0	0	0	0	192843	0	186508	0	0	0	0	0	0	0	0	0	0
P	3587	181.152	10.0687	C3H16N8O	180.144		7,9-Dodecadienal; (7E,9Z)-form	C12H20O	Constit. of the sex pheromone of Idaea biselata	0	0	0	0	0	0	0	0	0	0	0	0	0	0	0	0	0	0	0	0	0	0	0	0	0	166229	0	0	0	0	0	0	0	0	155020	0	0	0	0	0
P	4406	181.154	9.62021	[M+NH3] 17.0265 m/z adduct of 164.1285 m/z	180.147		8,10-Dodecadienal; (8E,10E)-form	C12H20O	Constit. of the pheromone of codling moth Cydia pomonella	0	5503.94	0	0	16316.3	0	0	0	0	0	0	0	5679.32	0	0	0	6035.18	5906.53	0	0	0	0	0	0	0	0	0	0	147990	0	0	136870	130994	0	0	0	132703	0	0	0
P	3931	181.156	10.0655	C7H20N2O3	180.148		8,10-Dodecadienal; (8E,10Z)-form	C12H20O	Constit. of the pheromone of Acria ceramitis	0	0	0	0	0	0	0	0	0	0	0	0	0	0	0	0	0	0	0	0	0	0	0	0	0	0	143350	0	0	0	135337	0	0	105756	0	0	0	0	0	0
P	4902	181.157	10.0935	C6H21N4P	180.15		3,6,8-Dodecatrien-1-ol	C12H20O		0	0	0	0	0	0	0	0	0	0	0	0	0	0	0	0	0	0	0	0	0	0	0	0	0	0	0	0	0	0	0	0	0	0	0	115395	0	0	0	0
P	4263	181.159	10.0599	C12H20O	180.151	-0.297525	Geosmin; 7,8-Didehydro	C12H20O	Constit. of various cactus spp. flower scents	0	0	0	0	0	0	0	0	0	0	0	0	0	0	0	0	0	0	0	0	0	0	0	0	0	0	0	114784	0	104317	0	0	0	0	0	0	0	0	0	0
P	3694	181.16	10.0687		180.153		Antibiotic BN 225	C9H10O4	Prod. by Pseudomonas cepacia	0	0	0	0	0	0	0	0	0	0	0	0	0	0	0	0	0	0	0	0	0	0	0	0	0	89731.6	0	0	0	0	0	0	0	0	88454.4	0	0	0	0	0
P	4471	181.163	9.82218	C2H16N10	180.156		1,3-Dihydro-4,5,7-trihydroxy-6-methylisobenzofuran	C9H10O4	Constit. of Aspergillus terreus	0	2829.12	0	0	10437.7	0	0	0	0	0	0	0	3113.17	0	0	0	4199.51	2904.24	0	0	0	0	0	0	0	0	0	0	75057.3	0	0	65652	62817	0	0	0	78027.5	0	0	0
P	5360	182.077	11.6943	C4H11N3O5	181.07		2,3-Dihydroxybenzoic acid; 2-Me ether, Me ester	C9H10O4		0	0	0	0	0	0	0	0	0	0	0	0	0	0	0	0	0	0	0	0	0	0	0	0	0	0	0	0	0	0	0	0	0	0	0	0	0	76476.5	0	0
P	6013	183.063	9.43425	C5H6N6O2	182.055	-0.0845121	2,4-Dihydroxybenzoic acid; Et ester	C9H10O4	Constit. of Artocarpus elasticus	0	0	0	0	0	0	0	0	0	0	0	0	0	0	0	0	0	0	0	0	0	0	0	0	0	0	0	0	0	0	0	0	0	0	0	0	0	0	0	75332.7
P	5592	183.065	9.42675	C9H10O4	182.058	-2.10111	Methylenomycin A	C9H10O4	Prod. by Streptomyces coelicolor and Streptomyces violaceoruber	0	0	0	0	0	0	0	0	0	0	0	0	0	0	0	0	0	0	0	0	0	0	0	0	0	0	0	0	0	0	0	0	0	0	0	0	0	0	92436.7	0
P	5210	183.066	9.43469	C10H6N4	182.059					0	0	0	0	0	0	0	0	0	0	0	0	0	0	0	0	0	0	0	0	0	0	0	0	0	0	0	0	0	0	0	0	0	0	0	0	0	102319	0	0
P	6271	183.068	9.42628	C8H11N2OP	182.061	-1.13916				0	0	0	0	0	0	0	0	0	0	0	0	0	0	0	0	0	0	0	0	0	0	0	0	0	0	0	0	0	0	0	0	0	0	0	0	0	0	0	0
P	6463	183.069	12.245	C6H14O4S	182.061	0.509125				0	0	0	0	0	0	0	0	0	0	0	0	0	0	0	0	0	0	0	0	0	0	0	0	0	0	0	0	0	0	0	0	0	0	0	0	0	0	0	0
P	5846	183.071	9.43425	C5H15N2OPS	182.064		3-Amino-2,4-dihydroxybenzoic acid; 4-Me ether, amide	C8H10N2O3	Prod. by Streptomyces sp. DGC1	0	0	0	0	0	0	0	0	0	0	0	0	0	0	0	0	0	0	0	0	0	0	0	0	0	0	0	0	0	0	0	0	0	0	0	0	0	0	0	131408
P	5994	183.071	12.2363	C5H15N2OPS	182.064		α-Amino-5-hydroxy-2-pyridinepropanoic acid; (S)-form	C8H10N2O3	Isol. from Streptomyces chibaensis	0	0	0	0	0	0	0	0	0	0	0	0	0	0	0	0	0	0	0	0	0	0	0	0	0	0	0	0	0	0	0	0	0	0	0	0	0	0	0	81335.6
P	2853	183.073	7.57395	C4H14N4S2	182.066		α-Amino-5-hydroxy-2-pyridinepropanoic acid; (±)-form	C8H10N2O3		0	0	0	0	0	0	0	0	0	0	0	0	0	0	60558.1	0	0	0	0	0	0	0	0	0	0	0	0	0	0	0	0	0	0	0	0	0	0	0	0	0
P	5622	183.073	12.2288	C4H14N4S2	182.066		2-Amino-4-nitrophenol; O,N-Di-Me	C8H10N2O3		0	0	0	0	0	0	0	0	0	0	0	0	0	0	0	0	0	0	0	0	0	0	0	0	0	0	0	0	0	0	0	0	0	0	0	0	0	0	84209.1	0
P	5488	183.073	9.42675	C4H14N4S2	182.066		2-(4-Hydroxy-3-nitrophenyl)ethylamine	C8H10N2O3	Isol. from the cactus Cereus validus	0	0	0	0	0	0	0	0	0	0	0	0	0	0	0	0	0	0	0	0	0	0	0	0	0	0	0	0	0	0	0	0	0	0	0	0	0	0	142907	0
P	3368	183.075	7.56762	C2H11N6O2P	182.068		3-(2-Oxo-5-pyridinyl)alanine	C8H10N2O3		0	0	0	0	0	0	0	0	0	0	0	0	0	0	0	0	0	0	0	0	0	66279.6	63043.7	0	0	0	0	0	0	0	0	0	0	0	0	0	0	71742.2	0	0
P	5143	183.075	9.43191	C2H11N6O2P	182.068					0	0	0	0	0	0	0	0	0	0	0	0	0	0	0	0	0	0	0	0	0	0	0	0	0	0	0	0	0	0	0	0	0	0	0	0	0	136711	0	0
P	5246	183.075	12.2423	C2H11N6O2P	182.068					0	0	0	0	0	0	0	0	0	0	0	0	0	0	0	0	0	0	0	0	0	0	0	0	0	0	0	0	0	0	0	0	0	0	0	0	0	90190.2	0	0
P	2981	183.076	7.5742	C8H10N2O3	182.069	-0.787924	(2-Hydroxyethyl)phosphonic acid; Di-Et ester	C6H15O4P		0	0	0	0	0	0	0	0	0	0	0	0	0	0	0	74296.5	0	0	0	0	0	0	0	95439.2	76155.3	0	0	0	0	0	0	0	0	0	0	0	0	0	0	0
P	6254	183.077	9.43184	CH10N8OS	182.07		2,3-Dihydro-2-(1-nonene-3,5,7-triynyl)furan; (Z)-form	C13H10O	Isol. from Chrysanthemum leucanthemum, Santolina chamaecyparissus and Santolina rosmarinifolia	0	0	0	0	0	0	0	0	0	0	0	0	0	0	0	0	0	0	0	0	0	0	0	0	0	0	0	0	0	0	0	0	0	0	0	0	0	0	0	0
P	6330	183.077	12.2395	CH10N8OS	182.07		2-(6,8-Nonadiene-2,4-diynyl)furan	C13H10O		0	0	0	0	0	0	0	0	0	0	0	0	0	0	0	0	0	0	0	0	0	0	0	0	0	0	0	0	0	0	0	0	0	0	0	0	0	0	0	0
P	3081	183.078	7.56623	C6H15O4P	182.07	-1.98048	7-Phenyl-2-heptene-4,6-diyn-1-ol	C13H10O		0	0	0	0	0	0	0	0	0	0	0	0	0	0	0	0	83983.2	0	0	0	0	0	0	0	0	0	0	0	0	0	0	0	0	0	0	0	0	0	0	0
							7-Phenyl-2-heptene-4,6-diyn-1-ol; (E)-form	C13H10O	Constit. of Dahlia coccinea and Dahlia pinnata. Also from Coreopsis tinctoria
P	2662	183.08	7.58728	C5H14N2O3S	182.072		Ponticaepoxide	C13H10O		0	0	0	0	0	40045	0	0	0	0	0	0	39744.3	91634.6	0	0	0	91504.2	105508	0	0	0	0	0	0	0	0	0	64140.8	0	64937.2	62745.5	61296.9	967.466	0	0	67733.1	0	0	135152
P	5855	183.08	9.43425	C5H14N2O3S	182.073	-2.49915	2,10,12-Tridecatriene-4,6,8-triyn-1-ol; (E,E)-form	C13H10O	Isol. from Cosmos sulphureus, Cosmos hybridus, Coreopsis tinctoria, Dahlia coccinea, Dahlia scapigera and others	0	0	0	0	0	0	0	0	0	0	0	0	0	0	0	0	0	0	0	0	0	0	0	0	0	0	0	0	0	0	0	0	0	0	0	0	0	0	0	143127
P	5936	183.08	12.2363	C5H14N2O3S	182.073	-2.20583	2,10,12-Tridecatriene-4,6,8-triyn-1-ol; (E,E)-form	C13H10O	Isol. from Cosmos sulphureus, Cosmos hybridus, Coreopsis tinctoria, Dahlia coccinea, Dahlia scapigera and others	0	0	0	0	0	0	0	0	0	0	0	0	0	0	0	0	0	0	0	0	0	0	0	0	0	0	0	0	0	0	0	0	0	0	0	0	0	0	0	96268.6
P	2783	183.081	7.56059	C5H16N2OP2	182.074					0	0	0	0	0	0	0	0	0	0	0	0	0	0	107608	0	0	0	99611.3	105856	0	0	0	0	0	0	71560.7	0	0	0	0	0	0	71183	0	83705.9	0	0	0	0
P	5619	183.082	12.2288	C5H16N2OP2	182.075					0	0	0	0	0	0	0	0	0	0	0	0	0	0	0	0	0	0	0	0	0	0	0	0	0	0	0	0	0	0	0	0	0	0	0	0	0	0	98945.4	0
P	5512	183.082	9.42675	C4H15N4PS	182.075					0	0	0	0	0	0	0	0	0	0	0	0	0	0	0	0	0	0	0	0	0	0	0	0	0	0	0	0	0	0	0	0	0	0	0	0	0	0	138592	0
P	3288	183.082	7.57446	C4H15N4PS	182.075					0	0	0	0	0	0	0	0	0	0	0	0	0	0	0	0	0	0	0	0	102387	0	0	0	0	0	0	0	0	0	0	0	0	0	0	0	0	0	143556	0
P	3349	183.084	7.56177	C2H10N6O4	182.076	-1.57453	Galactitol	C6H14O6	Occurs in various mannas such as Melampyrum nemorosum, Gymnosporia diflexa and Maytenus ebenifolia. Also present in Evonymus atropurpureus, in seaweeds and in the pentose fermenting yeast Torula utilis	0	0	0	0	0	0	0	0	0	0	0	0	0	0	0	0	0	0	0	0	0	109725	107975	0	0	0	0	77840.5	0	81237.5	0	0	0	0	0	0	0	156944	0	0
P	5206	183.084	9.43469	C2H10N6O4	182.076	-0.852877	Glucitol; D-form	C6H14O6	Occurs widely in plants ranging from algae to the higher orders. Fruits of the plant family Rosaceae, which include apples, pears, cherries and apricots, contain appreciable amounts. Rich sources are the fruits of the Sorbus and Crataegus spp.	0	0	0	0	0	0	0	0	0	0	0	0	0	0	0	0	0	0	0	0	0	0	0	0	0	0	0	0	0	0	0	0	0	0	0	0	0	122768	0	0
P	5285	183.084	12.2423	C2H10N6O4	182.076	-0.629399	Hamamelitol; D-form	C6H14O6	Found in leaves of numerous plant spp.; high levels in leaves of Hedera helix	0	0	0	0	0	0	0	0	0	0	0	0	0	0	0	0	0	0	0	0	0	0	0	0	0	0	0	0	0	0	0	0	0	0	0	0	0	98907.8	0	0
P	2928	183.085	7.56611	C3H6N10	182.078		Iditol; D-form	C6H14O6	Isol. from Stypopodium schimperi	0	0	0	0	0	0	0	0	0	0	0	0	0	0	0	117559	0	0	0	0	0	0	0	117267	116813	82548	0	0	0	0	0	0	0	0	90454.8	0	0	0	0	0
P	6333	183.086	9.43184	C3H6N10	182.078		Iditol; L-form	C6H14O6	Occurs with D-glucitol in the berry of mountain ash (Sorbus aucuparia) and in other plants	0	0	0	0	0	0	0	0	0	0	0	0	0	0	0	0	0	0	0	0	0	0	0	0	0	0	0	0	0	0	0	0	0	0	0	0	0	0	0	0
P	6448	183.086	12.2395	C3H6N10	182.078		Mannitol; DL-form	C6H14O6		0	0	0	0	0	0	0	0	0	0	0	0	0	0	0	0	0	0	0	0	0	0	0	0	0	0	0	0	0	0	0	0	0	0	0	0	0	0	0	0
P	3049	183.086	7.56623	C6H14O6	182.079	0.0549164	Mannitol; D-form	C6H14O6	Widespread in plants and their exudates particularly olive and plane trees. Obt. from manna and seaweeds. Obt. industrially from Fructose	0	0	0	0	0	0	0	0	0	0	0	0	0	0	0	0	117983	0	0	0	0	0	0	0	0	0	0	0	0	0	0	0	0	0	0	0	0	0	0	0
P	2639	183.088	7.57959	H10N10S	182.081					0	0	0	0	0	52575.8	0	0	0	0	0	0	50237.1	115816	0	0	0	116155	123047	0	0	0	0	0	0	0	0	0	78233.5	0	70577	78489.6	78027.1	1709.49	0	0	100214	0	0	181147
P	6002	183.089	9.43425	H10N10S	182.081					0	0	0	0	0	0	0	0	0	0	0	0	0	0	0	0	0	0	0	0	0	0	0	0	0	0	0	0	0	0	0	0	0	0	0	0	0	0	0	124443
P	2785	183.09	7.56059	C5H15N2O3P	182.082					0	0	0	0	0	0	0	0	0	0	0	0	0	0	103583	0	0	0	117356	116754	0	0	0	0	0	0	78192	0	0	0	0	0	0	90409.4	0	112938	0	0	0	0
P	5662	183.091	9.42675	C4H14N4O2S	182.083					0	0	0	0	0	0	0	0	0	0	0	0	0	0	0	0	0	0	0	0	0	0	0	0	0	0	0	0	0	0	0	0	0	0	0	0	0	0	197362	0
P	3287	183.091	7.57462	C4H14N4O2S	182.084					0	0	0	0	0	0	0	0	0	0	0	0	0	0	0	0	0	0	0	0	107848	0	0	0	0	0	0	0	0	0	0	0	0	0	0	0	0	0	198057	0
P	3351	183.092	7.56013	C4H16N4P2	182.085	2.9551				0	0	0	0	0	0	0	0	0	0	0	0	0	0	0	0	0	0	0	0	0	102961	104813	0	0	0	0	72577.9	0	73225.4	0	0	0	0	0	0	0	170142	0	0
P	2939	183.094	7.56611	C10H15OP	182.086		Asarinol C; (+)-form	C10H14O3	Constit. of Asiasarum sieboldi	0	0	0	0	0	0	0	0	0	0	0	0	0	0	0	105578	0	0	0	0	0	0	0	88103.3	104558	68492.3	0	0	0	0	0	0	0	0	93833.1	0	0	0	0	0
P	3064	183.095	7.56623	CH10N8O3	182.088		1,3,5-Benzenetriol; Di-Et ether	C10H14O3	Constit. of the leaves of Solanum nigrum	0	0	0	0	0	0	0	0	0	0	0	0	0	0	0	0	98207.4	0	0	0	0	0	0	0	0	0	0	0	0	0	0	0	0	0	0	0	0	0	0	0
P	2659	183.097	7.6014	C7H19OPS	182.09		Bombardolide A; 4,5-Dihydro	C10H14O3	Prod. by Bombardioidea anartia	0	0	0	0	0	44799.7	0	0	0	0	0	0	42455.1	98133.1	0	0	0	89227.9	91902.4	0	0	0	0	0	0	0	0	0	62947.4	0	57033.2	63115.4	73128.3	6586.98	0	0	97229.8	0	0	160068
P	2833	183.098	7.56444	C6H18N2S2	182.091		Boschnaloside; Aglycone	C10H14O3	Constit. of Alberta magna andBoschniakia rossica	0	0	0	0	0	0	0	0	0	0	0	0	0	0	72638.4	0	0	0	86181.1	83427.1	0	0	0	0	0	0	0	0	0	0	0	0	0	77914.6	0	115047	0	0	0	0
P	3298	183.099	7.57446	C6H10N6O	182.092		Coleolactone	C10H14O3	Constit. of Coleus forskohlii	0	0	0	0	0	0	0	0	0	0	0	0	0	0	0	0	0	0	0	0	72713	0	0	0	0	0	0	0	0	0	0	0	0	0	0	0	0	0	208243	0
P	3369	183.101	7.56762	C4H15N4O2P	182.093		Crocusatin I	C10H14O3	Constit. of Crocus sativus (saffron)	0	0	0	0	0	0	0	0	0	0	0	0	0	0	0	0	0	0	0	0	0	66158.5	71104.5	0	0	0	0	0	0	0	0	0	0	0	0	0	0	143501	0	0
P	2993	183.102	7.57434	C3H14N6OS	182.095	2.68178	4-Hydroxy-3-methyl-6-(1-methylpropyl)-2H-pyran-2-one; (S)-form	C10H14O3	Prod. by Streptomyces coelicolor A3(2)	0	0	0	0	0	0	0	0	0	0	0	0	0	0	0	78221.5	0	0	0	0	0	0	0	0	68198.1	0	0	0	0	0	0	0	0	0	0	0	0	0	0	0
P	3130	183.104	7.56623		182.096		3-(5-Oxazolyl)-1H-indole	C11H8N2O	Prod. by Streptomyces sp. SF 2583 and Streptomyces roseolilacinus NBRC 12815	0	0	0	0	0	0	0	0	0	0	0	0	0	0	0	0	69186.2	0	0	0	0	0	0	0	0	0	0	0	0	0	0	0	0	0	0	0	0	0	0	0
P	2655	185.066	3.93263	C6H16O2S2	184.059					0	0	0	0	1945.5	47847.2	3019.62	0	0	0	0	0	55925.2	82533.7	0	0	0	78133.9	99239.1	0	0	0	0	0	0	0	0	0	103898	0	0	0	0	0	0	0	76722.3	0	0	122361
P	2755	185.067	2.36096	C6H8N4O3	184.06					0	0	0	0	0	0	0	0	0	0	0	0	0	0	219704	0	0	0	96676	0	0	0	0	0	0	0	0	0	100352	0	168756	0	166862	0	0	0	0	0	0	0
P	2549	185.068	2.36052	C4H13N2O4P	184.061					0	0	0	0	0	0	0	0	0	0	74234.4	0	0	0	0	0	0	0	0	160488	0	0	0	0	0	0	202588	0	0	0	0	204747	0	127948	0	174100	0	0	232774	0
P	3336	185.07	2.35721	C5H9N6P	184.063					0	0	0	0	0	0	0	0	0	0	0	0	0	0	0	0	0	0	0	0	0	264785	228381	0	0	0	0	0	0	0	0	0	0	0	0	0	0	325647	0	0
P	3440	185.071	2.36653	C11H8N2O	184.064	0.0126318				0	0	0	0	0	0	0	0	0	0	0	0	0	0	0	0	0	0	0	0	0	0	0	0	288327	0	0	0	0	285419	0	0	0	0	0	0	0	0	0	0
P	602	185.072	2.35423	C3H14N4OP2	184.065		2-Alkyl-4-(hydroxymethyl)-3-furancarboxylic acids; 4-(Hydroxymethyl)-2-propyl-3-furancarboxylic acid	C9H12O4	Prod. by Streptomyces coelicolor	0	0	145034	209003	0	0	0	0	0	0	0	0	0	0	0	294999	338515	0	0	0	0	0	0	312615	0	380698	0	314767	0	0	0	0	0	0	292408	0	0	0	0	0
P	258	185.074	2.36521	C8H12N2OS	184.067		1,2,3,4-Benzenetetrol; 1,2,3-Tri-Me ether	C9H12O4		0	236081	0	0	217836	259351	0	0	0	0	0	0	260678	423668	0	0	0	411192	0	0	0	0	0	0	0	0	0	0	0	0	0	0	0	0	0	0	409120	0	0	462873
P	1478	185.076	2.35983	C6H17O2PS	184.069		1,2,3,5-Benzenetetrol; 1,2,3-Tri-Me ether	C9H12O4	Occurs in Antiaris toxicaria	0	0	0	0	0	0	290190	0	0	0	0	297347	0	0	583538	0	0	0	457330	499136	0	0	0	0	0	0	0	0	484821	0	529555	0	499993	0	0	0	0	0	0	630913
P	1882	185.077	2.36179	C6H19P3	184.07		1,2,4,5-Benzenetetrol; 2,4,5-Tri-Me ether	C9H12O4		0	0	0	0	0	0	0	336303	0	352542	305764	0	0	0	0	0	0	0	0	0	547830	0	602256	0	0	0	587100	0	0	0	0	568499	0	528765	0	520539	0	0	743427	0
P	2297	185.079	2.36249	C3H13N4O3P	184.072		Buergerinin G	C9H12O4	Constit. of Scrophularia buergeriana	0	0	0	0	0	0	0	0	377002	0	0	0	0	0	0	674657	0	0	0	0	0	636818	0	684097	653872	0	0	702798	0	676084	0	0	0	0	0	0	0	887934	0	0
P	584	185.081	2.3488	C9H12O4	184.074	1.62689	Verrucosapyrone A; 5,6-Didehydro	C9H12O4	Prod. by Penicillium nordicum (IBT 6573) and Penicillium verrucosum (IBT 10003)	0	0	319008	447770	0	0	0	0	0	0	0	0	0	0	0	0	693873	0	0	0	0	0	0	0	0	770485	0	0	0	0	0	0	0	0	658105	0	0	0	0	0
P	174	185.083	2.36521	C2H14N6P2	184.076		Cyclo(alanyl-4-hydroxyprolyl); (3S,7R,8aS)-form	C8H12N2O3	Prod. by a strain of Ruegeria sp. from Suberites domuncula. Also isol. from Streptomyces fradiae	0	460531	0	0	448012	475328	0	0	0	0	0	0	476424	769937	0	0	0	753557	0	0	0	0	0	0	0	0	0	0	0	0	0	0	0	0	0	0	763846	0	0	797375
P	1423	185.085	2.35983	C6H16O4S	184.077		Echinobetaine B	C8H12N2O3	Isol. from the sponge Echinodictyum sp.	0	0	0	0	0	0	484561	0	0	0	0	493717	0	0	811065	0	0	0	759891	795450	0	0	0	0	0	0	0	0	821469	0	822277	0	796068	0	0	0	0	0	0	1.11742e+06
P	1843	185.086	2.36179	C7H12N4S	184.079		Primocarcin	C8H12N2O3	Isol. from Nocardia fukaya	0	0	0	0	0	0	0	505042	0	512180	482659	0	0	0	0	0	0	0	0	0	810532	0	821427	0	0	0	849279	0	0	0	0	818818	0	789219	0	804077	0	0	1.16659e+06	0
P	2277	185.088	2.36249	C3H12N4O5	184.081					0	0	0	0	0	0	0	0	505836	0	0	0	0	0	0	827019	0	0	0	0	0	801128	0	798362	789880	0	0	834017	0	832961	0	0	0	0	0	0	0	1.21878e+06	0	0
P	580	185.09	2.3488	C4H8N8O	184.083					0	0	370372	511685	0	0	0	0	0	0	0	0	0	0	0	0	774810	0	0	0	0	0	0	0	0	837959	0	0	0	0	0	0	0	0	804545	0	0	0	0	0
P	167	185.092	2.36521	C8H12N2O3	184.084	-2.00035				0	489504	0	0	496443	480362	0	0	0	0	0	0	477327	768881	0	0	0	764397	0	0	0	0	0	0	0	0	0	0	0	0	0	0	0	0	0	0	783683	0	0	771372
P	1428	185.093	2.35983	CH12N8OS	184.086		1-Methyl-β-carboline; 3,4-Dihydro	C12H12N2	Alkaloid from Flindersia laevicarpa, Elaeagnus angustifolia, Strychnos dale and Burkea africana	0	0	0	0	0	0	459469	0	0	0	0	461924	0	0	673140	0	0	0	720338	708483	0	0	0	0	0	0	0	0	774605	0	743977	0	722361	0	0	0	0	0	0	1.07989e+06
P	1851	185.095	2.36179	C7H13N4P	184.087					0	0	0	0	0	0	0	442465	0	433497	433045	0	0	0	0	0	0	0	0	0	700689	0	659445	0	0	0	722969	0	0	0	0	706058	0	694175	0	726159	0	0	1.02757e+06	0
P	2291	185.097	2.36487	C5H18N2OP2	184.089					0	0	0	0	0	0	0	0	408252	0	0	0	0	0	0	631570	0	0	0	0	0	617940	0	589222	591585	0	0	613027	0	642400	0	0	0	0	0	0	0	982224	0	0
P	587	185.098	2.3488	C4H17N4PS	184.091					0	0	280028	392074	0	0	0	0	0	0	0	0	0	0	0	0	557981	0	0	0	0	0	0	0	0	590940	0	0	0	0	0	0	0	0	622462	0	0	0	0	0
P	205	185.1	2.36892	C3H8N10	184.093					0	348240	0	0	362329	341472	0	0	0	0	0	0	331547	529926	0	0	0	523844	0	0	0	0	0	0	0	0	0	0	0	0	0	0	0	0	0	0	529573	0	0	186154
P	1469	185.102	2.35983	C6H16O6	184.095					0	0	0	0	0	0	318343	0	0	0	0	314906	0	0	435938	0	0	0	477308	458523	0	0	0	0	0	0	0	0	514950	0	477372	0	475292	0	0	0	0	0	0	730743
P	1902	185.103	2.36179	C7H12N4O2	184.096					0	0	0	0	0	0	0	293576	0	286036	289525	0	0	0	0	0	0	0	0	0	447015	0	415390	0	0	0	442976	0	0	0	0	444131	0	472788	0	471129	0	0	671379	0
P	2326	185.105	2.36487	C5H17N2O3P	184.098					0	0	0	0	0	0	0	0	266144	0	0	0	0	0	0	402487	0	0	0	0	0	384212	0	364252	363972	0	0	381451	0	402880	0	0	0	0	0	0	0	621842	0	0
P	600	185.107	2.3488	C12H12N2	184.1	-1.12928				0	0	183158	270162	0	0	0	0	0	0	0	0	0	0	0	0	348651	0	0	0	0	0	0	0	0	353002	0	0	0	0	0	0	0	0	389758	0	0	0	0	0
P	279	185.109	2.36521	C10H17OP	184.102					0	231079	0	0	234973	227471	0	0	0	0	0	0	220837	351507	0	0	0	329248	0	0	0	0	0	0	0	0	0	0	0	0	0	0	0	0	0	0	333152	0	0	319858
P	1325	185.11	8.08436	C10H17OP	184.102					0	0	0	0	0	121000	0	0	0	0	0	0	75564.2	64625.3	0	0	0	66080.1	77465.8	0	0	0	0	0	0	0	2721.65	0	51260.3	0	57977	64562.3	57162	68713.1	0	0	51854.3	0	0	116206
P	1542	185.111	2.36168	CH12N8O3	184.103					0	0	0	0	0	0	212907	0	0	0	0	218977	0	0	281002	0	0	0	307965	289607	0	0	0	0	0	0	0	0	315786	0	292334	0	324510	0	0	0	0	0	0	448589
P	1720	185.111	8.07522	C9H16N2S	184.103		2-Acetyl-5-methylcyclopentanecarboxylic acid; Me ester	C10H16O3	Constit. of Nepeta cataria	0	0	0	0	0	0	138240	0	0	0	0	130866	0	0	0	0	0	0	0	0	0	0	0	0	0	0	0	0	0	0	0	0	0	0	0	0	0	0	0	0
P	2076	185.112	8.07268		184.105		3,4-Bis(hydroxymethyl)-5,5-dimethyl-2-cyclohexen-1-one; (S)-form	C10H16O3	Constit of Gardenia jasminoides	0	0	0	0	0	0	0	165218	0	153866	143210	0	0	0	140845	0	0	0	0	112623	121838	0	0	0	0	0	0	0	0	0	0	0	0	0	0	0	0	0	131522	0
P	1970	185.112	2.36179		184.105		5-Butyltetrahydrofuro[3,2-b]furan-2(3H)-one; (3aR,5R,6aR)-form	C10H16O3	Isol. from the Hagen's gland of Diachasmimorpha longicaudata	0	0	0	0	0	0	0	192408	0	191888	203751	0	0	0	0	0	0	0	0	0	280305	0	260773	0	0	0	274337	0	0	0	0	284746	0	288667	0	294977	0	0	415070	0
P	2436	185.114	8.06585	H13N10P	184.106		Crocusatin J	C10H16O3	Constit. of Crocus sativus	0	0	0	0	0	0	0	0	172638	0	0	0	0	0	0	0	0	0	0	0	0	137941	139382	0	146629	0	0	123903	0	115218	0	0	0	0	0	0	0	164731	0	0
P	2377	185.114	2.36368	C6H12N6O	184.107		Cyclononactic acid	C10H16O3	Prod. by Actinomycete strain BS 1465 and Streptomyces sp. Is9131	0	0	0	0	0	0	0	0	186907	0	0	0	0	0	0	258305	0	0	0	0	0	240346	0	228613	232524	0	0	224329	0	245035	0	0	0	0	0	0	0	378293	0	0
P	2959	185.115	8.06653	C6H12N6O	184.108		6,8-Decadiene-1,3,5-triol; (3S,5R,6E,8E)-form, 5-Ketone	C10H16O3	Isol. from Streptomyces strain C57	0	0	0	0	0	0	0	0	0	0	0	0	0	0	0	163856	0	0	0	0	0	0	0	180995	0	136343	0	0	0	0	0	0	0	0	135277	0	0	0	0	0
P	614	185.116	2.3488	C4H17N4O2P	184.109		Densispicnin A	C10H16O3	Constit. of Pedicularis densispica	0	0	108860	164826	0	0	0	0	0	0	0	0	0	0	0	0	217337	0	0	0	0	0	0	0	0	210254	0	0	0	0	0	0	0	0	239720	0	0	0	0	0
P	339	185.116	8.0638	C4H17N4O2P	184.109		Dihydro-5-(5-hydroxy-1,3-hexadienyl)-2(3H)-furanone; (1'E,3'E,5ξ,5'R)-form, 3',4'-Dihydro	C10H16O3	Prod. by Diplodia corticola	0	218260	228374	211437	215157	0	0	0	0	0	0	0	0	0	0	0	165575	0	0	0	0	0	0	0	0	0	0	0	0	0	0	0	0	0	0	0	0	0	0	0
P	386	185.118	2.36521	C3H16N6OS	184.11	2.52625	Feigrisolide A; 8-Epimer, 3-deoxy, 2,3-didehydro	C10H16O3	Prod. by the marine-derived Streptomyces sp. B5375	0	137000	0	0	138002	137185	0	0	0	0	0	0	90785.8	201697	0	0	0	202067	0	0	0	0	0	0	0	0	0	0	0	0	0	0	0	0	0	0	190009	0	0	177150
P	1117	185.118	8.1403	C3H16N6OS	184.111					0	0	0	0	2947.04	230365	0	0	0	0	0	0	218439	192814	0	0	0	193835	0	0	0	0	0	0	0	0	0	0	160411	0	118279	221085	202490	4234.63	0	0	184456	0	0	211780
P	1577	185.119	8.05838		184.112					0	0	0	0	0	0	249361	0	0	0	0	229223	0	0	0	0	0	0	195884	0	0	0	0	0	0	0	171891	0	0	0	166840	0	0	185490	0	0	0	0	0	0
P	1659	185.119	2.36052	C9H17N2P	184.112					0	0	0	0	0	0	84331.4	0	0	0	0	84973.1	0	0	150811	0	0	0	192145	178254	0	0	0	0	0	0	0	0	0	0	173284	0	187229	0	0	0	0	0	0	238812
P	1972	185.121	8.07113	C9H17N2P	184.113					0	0	0	0	0	0	0	259376	0	246767	236169	0	0	0	206600	0	0	0	0	204534	202679	0	0	0	0	0	0	0	0	0	0	0	0	0	0	171902	0	0	219549	0
P	2529	185.121	2.36423	C9H17N2P	184.113					0	0	0	0	0	0	0	0	0	104830	112718	0	0	0	0	0	0	0	0	0	165175	0	144646	0	0	0	107931	0	0	0	0	176236	0	164172	0	163233	0	0	210259	0
P	2367	185.122	8.06585	H12N10O2	184.115		Cyclo(alanylisoleucyl); (1'S,3S,6S)-form	C9H16N2O2	Constit. of the roots of Panax notoginseng, Psammosilene tunicoides and the tubers of Pinellia pedatisecta. Metab. of Pseudoalteromonas haloplanktis. Prod. by Nocardia alba YIM 30243	0	0	0	0	0	0	0	0	251748	0	0	0	0	0	0	0	0	0	0	0	0	199103	209870	0	203287	0	0	182453	0	182164	0	0	0	0	0	0	0	236106	0	0
P	2476	185.123	2.36442	H12N10O2	184.115		Cyclo(alanylleucyl); (3S,6S)-form	C9H16N2O2	Prod. by Aspergillus phoenicis, Nocardiopsis sp. and a marine-derived Streptomyces praecox 291-11. Isol. from the tubers of Pinellia pedatisecta and the roots of Panax notoginseng and Psammosilene tunicoides	0	0	0	0	0	0	0	0	66056	0	0	0	0	0	0	92709.8	0	0	0	0	0	134077	0	78622.2	85219.1	0	0	77605.2	0	0	0	0	0	0	0	0	0	179684	0	0
P	2922	185.124	8.06653	C4H16N4O4	184.116		Cyclo(alanylleucyl); (3R,6S)-form	C9H16N2O2		0	0	0	0	0	0	0	0	0	0	0	0	0	0	0	205991	0	0	0	0	0	0	0	202105	0	178363	0	0	0	0	0	0	0	0	181681	0	0	0	0	0
P	675	185.125	2.3477	C4H16N4O4	184.117					0	0	56864.4	0	0	0	0	0	0	0	0	0	0	0	0	0	72350.4	0	0	0	0	0	0	0	0	70650.8	0	0	0	0	0	0	0	0	82573.5	0	0	0	0	0
P	302	185.125	8.0638	C4H16N4O4	184.118					0	255517	327137	301832	259559	0	0	0	0	0	0	0	0	0	0	0	198284	0	0	0	0	0	0	0	0	0	0	0	0	0	0	0	0	0	0	0	0	0	0	0
P	1089	185.127	8.08128	C3H17N6OP	184.119					0	0	0	0	20319.4	255089	0	0	0	0	0	0	244776	212642	0	0	0	204477	0	0	0	0	0	0	0	0	0	0	188587	0	128429	191356	198050	2484.44	0	0	170180	0	0	238411
P	2703	185.127	3.95538	C3H17N6OP	184.12					0	0	0	0	4093.65	43330.3	43020.3	0	0	0	0	0	45480.7	96741.9	0	0	0	68171.7	57494	0	0	0	0	0	0	0	0	0	63552.5	0	0	0	0	0	0	0	56311.5	0	0	116179
							1,4-Dimethyl-7-ethylazulene	C14H16	Isol. as artifact from various sesquiterpene oils, e.g. from Achillea and Artemisia spp.
P	1565	185.128	8.05838	C3H17N6OP	184.121					0	0	0	0	0	0	281847	0	0	0	0	241254	0	0	0	0	0	0	194016	0	0	0	0	0	0	0	174337	0	0	0	181456	0	0	179908	0	0	0	0	0	0
P	4713	185.128	2.35445	C9H16N2O2	184.121	-1.44206	3,7-Dimethyl-1-(methylthio)-2,6-octadiene; (E)-form	C11H20S	Constit. of the pheromone of Idea leuconoe	0	0	0	0	0	0	0	0	0	0	0	0	0	0	0	0	0	0	0	0	0	0	0	0	0	0	0	0	0	0	0	0	66037.1	0	0	0	0	0	0	0
P	1983	185.129	8.07061	C2H16N8S	184.122					0	0	0	0	0	0	0	243343	0	235899	235335	0	0	0	191562	0	0	0	0	197853	185073	0	0	0	0	0	0	0	0	0	0	0	0	0	0	166233	0	0	226728	0
P	6745	185.129	2.37105	C2H16N8S	184.122					0	0	0	0	0	0	0	0	0	0	0	0	0	0	0	0	0	0	0	0	0	0	0	0	0	0	0	0	0	0	0	0	0	0	0	0	0	0	0	0
P	2380	185.131	8.06664		184.124					0	0	0	0	0	0	0	0	232497	0	0	0	0	0	0	0	0	0	0	0	0	163057	178388	0	160157	0	0	159048	0	164288	0	0	0	0	0	0	0	220298	0	0
P	2942	185.132	8.06653	C14H16	184.125	-0.744724				0	0	0	0	0	0	0	0	0	0	0	0	0	0	0	175275	0	0	0	0	0	0	0	143393	0	141994	0	0	0	0	0	0	0	0	147079	0	0	0	0	0
P	382	185.134	8.0638		184.126					0	181979	225597	206988	190488	0	0	0	0	0	0	0	0	0	0	0	153492	0	0	0	0	0	0	0	0	0	0	0	0	0	0	0	0	0	0	0	0	0	0	0
P	1176	185.135	8.08384	C3H16N6O3	184.128	-2.81159				0	0	0	0	6069.15	178293	0	0	0	0	0	0	169083	144884	0	0	0	151968	0	0	0	0	0	0	0	0	0	0	143845	0	88641.5	143261	138828	2192.61	0	0	133346	0	0	174123
P	1654	185.136	8.05838	C11H20S	184.129					0	0	0	0	0	0	168238	0	0	0	0	163795	0	0	0	0	0	0	134780	0	0	0	0	0	0	0	128404	0	0	0	125256	0	0	113571	0	0	0	0	0	0
P	2080	185.138	8.07113	C2H17N8P	184.131		2,2-Dimethyl-2H-1-benzopyran-6-carboxylic acid; Nitrile	C12H11NO		0	0	0	0	0	0	0	154076	0	151419	156147	0	0	0	116191	0	0	0	0	135889	126366	0	0	0	0	0	0	0	0	0	0	0	0	0	0	119548	0	0	159412	0
P	2446	185.14	8.06828	C8H16N4O	184.132		4-(1H-Indol-5-yl)-3-buten-2-one	C12H11NO	Alkaloid from the stem bark of Raputia simulans	0	0	0	0	0	0	0	0	143991	0	0	0	0	0	0	0	0	0	0	0	0	100789	114517	0	104060	0	0	107261	0	0	0	0	0	0	0	0	0	144621	0	0
P	3005	185.141	8.07477		184.134		4-(1H-Indol-6-yl)-3-buten-2-one; (E)-form	C12H11NO	Alkaloid from Monodora angolensis	0	0	0	0	0	0	0	0	0	0	0	0	0	0	0	102657	0	0	0	0	0	0	0	0	0	0	0	0	0	0	0	0	0	0	0	0	0	0	0	0
P	547	185.142	8.05835		184.135		2-(1-Propenyl)quinoline; 1',2'-Epoxide	C12H11NO	Alkaloid from leaves of Galipea longiflora (Rutaceae)	0	104754	136635	121714	113293	0	0	0	0	0	0	0	0	0	0	0	0	0	0	0	0	0	0	0	0	0	0	0	0	0	0	0	0	0	0	0	0	0	0	0
P	1321	185.144	8.09627		184.137		Streptazone F	C12H11NO	Prod. by Streptomyces sp. NEAU-Z4	0	0	0	0	0	103274	0	0	0	0	0	0	69285.7	63133.8	0	0	0	64863.4	60955.7	0	0	0	0	0	0	0	1332.33	0	53447.8	0	56113.3	59386.1	57573.2	48909.3	0	0	57271.7	0	0	74094.4
P	5963	186.081	3.93112	C6H11N5S	185.074					0	0	0	0	579.5	27652.5	33074.3	0	0	0	0	0	28160.5	44917.9	0	0	0	44328.4	45398.8	0	0	0	0	0	0	0	0	0	49323	0	0	0	0	0	0	0	42250.3	0	0	64046.8
P	5596	186.083	2.37122	C2H11N5O5	185.076					0	0	0	0	0	0	0	0	0	0	0	0	0	0	0	0	0	0	0	0	0	0	0	0	0	0	0	0	0	0	0	0	0	0	0	0	0	0	69314.4	0
P	5875	186.09	3.93567	C5H16NO4P	185.082					0	0	0	0	2611.61	39924.7	44431.3	0	0	0	0	0	39570.3	63814.1	0	0	0	63583.1	60755.8	0	0	0	0	0	0	0	0	0	63624.6	0	0	0	0	0	0	0	60669.8	0	0	83363.4
P	6738	186.092	2.37105	C4H17N3OP2	185.085	2.87744				0	0	0	0	0	0	0	0	0	0	0	0	0	0	0	0	0	0	0	0	0	0	0	0	0	0	0	0	0	0	0	0	0	0	0	0	0	0	0	0
P	2142	186.937	18.6277	C2H2O6S2	185.93					0	0	0	0	0	0	0	845761	0	0	0	0	0	0	0	0	0	0	0	0	0	0	0	0	0	904740	0	0	0	0	0	654109	706968	0	0	0	0	0	0	0
P	6294	186.938	18.5582	C2H4O4P2S	185.931					0	0	0	0	0	0	0	0	0	0	0	0	0	0	0	0	0	0	0	0	0	0	0	0	0	0	0	0	0	0	0	0	0	0	0	0	0	0	0	0
P	471	186.94	18.6182	CH3N2O3PS2	185.933					0	1045970	1.1483e+06	1.21809e+06	0	0	0	0	0	0	0	0	903436	0	0	1.02715e+06	982757	0	0	0	0	0	0	0	0	0	1.43573e+06	0	975315	0	1.01456e+06	0	0	1.00174e+06	0	0	745578	0	0	0
P	1570	186.943	18.626	C6H3OPS2	185.936					0	0	0	0	0	0	1.70863e+06	0	0	1.40826e+06	1.1338e+06	0	0	0	1.16292e+06	0	0	0	1.07114e+06	1.28764e+06	0	0	0	1.31701e+06	0	0	0	1.60468e+06	0	1.4926e+06	0	0	0	0	0	0	0	0	1.01079e+06	0
P	1975	186.945	18.6253	C5H2N2S3	185.938					0	0	0	0	0	0	0	1.6605e+06	1.60001e+06	0	0	0	0	0	0	0	0	0	0	0	1.36529e+06	0	1.27099e+06	0	0	0	0	0	0	0	0	1.46792e+06	0	0	1.41957e+06	0	0	969453	0	0
P	3355	186.946	18.6213	C2H3O6PS	185.939					0	0	0	0	0	0	0	0	0	0	0	0	0	0	0	0	0	0	0	0	0	1.42259e+06	0	0	1.23637e+06	1.78752e+06	0	0	0	0	0	0	1.49983e+06	0	0	0	0	0	0	0
P	6197	186.947	18.5332	C2H5O4P3	185.94					0	0	0	0	0	0	0	0	0	0	0	0	0	0	0	0	0	0	0	0	0	0	0	0	0	0	0	0	0	0	0	0	0	0	0	0	0	0	0	0
P	354	186.949	18.6085	C2H6N2S4	185.941		2-Iodoethanol; Me ether	C3H7IO		0	1.5233e+06	2.0035e+06	2.21118e+06	0	0	0	0	0	0	0	0	1.57125e+06	0	0	1.65355e+06	1.47396e+06	0	0	0	0	0	0	0	0	0	2.33702e+06	0	1.9243e+06	0	1.61588e+06	0	0	1.59124e+06	0	0	1.24327e+06	0	0	0
P	5857	186.949	18.647	CH4N2O3P2S	185.942					0	343192	0	0	439886	0	0	0	0	0	0	0	380833	0	0	0	451390	285746	0	0	0	0	0	0	0	0	293913	0	0	0	288953	0	0	191112	0	0	198913	0	0	1.42119e+06
P	1521	186.952	18.6355	H5N4P3S	185.945					0	0	0	0	0	0	2.19537e+06	0	0	1.67471e+06	1.45581e+06	0	0	0	1.50678e+06	0	0	0	1.37959e+06	1.5879e+06	0	0	0	0	0	0	0	2.10722e+06	0	1.7631e+06	0	0	0	0	0	0	0	0	1.11751e+06	0
P	1957	186.954	18.6234	C2H2O8S	185.947					0	0	0	0	0	0	0	1.81028e+06	2.01413e+06	0	0	0	0	0	0	0	0	0	0	0	1.53914e+06	0	1.47474e+06	0	0	0	0	0	0	0	0	1.62308e+06	0	0	1.5369e+06	0	0	1.54816e+06	0	0
P	3353	186.955	18.6109	C5H3N2PS2	185.948					0	0	0	0	0	0	0	0	0	0	0	0	0	0	0	0	0	0	0	0	0	1.33878e+06	0	0	1.37866e+06	2.05925e+06	0	0	0	0	0	0	1.35309e+06	0	0	0	0	0	0	0
P	6195	186.956	18.5332	C3H8OP2S2	185.949					0	0	0	0	0	0	0	0	0	0	0	0	0	0	0	0	0	0	0	0	0	0	0	0	0	0	0	0	0	0	0	0	0	0	0	0	0	0	0	0
P	380	186.957	18.6154	CH3N2O5PS	185.95					0	1.35808e+06	1.84769e+06	2.10686e+06	0	0	0	0	0	0	0	0	1.51417e+06	0	0	1.24439e+06	1.3867e+06	0	0	0	0	0	0	0	0	0	1.87026e+06	0	1.73413e+06	0	1.54001e+06	0	0	1.45668e+06	0	0	1.20145e+06	0	0	0
P	5879	186.958	18.5849	C2H7N2PS3	185.951					0	8734.53	0	0	552038	0	0	0	0	0	0	235763	354583	0	0	0	397475	235514	0	0	0	0	0	0	0	0	263173	0	0	0	274779	0	0	171402	0	0	35060.5	0	0	951935
P	1568	186.961	18.6472	C8N2P2	185.954	-2.9463	Methyl [[(methylthio)methyl]thio]methyl disulfide	C4H10S4	Constit. of the bark of Scorodophloeus zenkeri	0	0	0	0	0	0	1.72935e+06	0	0	1.28977e+06	1.16665e+06	0	0	0	1.07341e+06	0	0	0	1.16339e+06	1.18735e+06	0	0	0	0	0	0	0	1.803e+06	0	1.33535e+06	0	0	0	0	0	0	0	0	1.34423e+06	0
P	2025	186.963	18.6586	C6H5OP3	185.955					0	0	0	0	0	0	0	1.41313e+06	1.51763e+06	0	0	0	0	0	0	0	0	0	0	0	1.1125e+06	0	1.02065e+06	0	0	0	0	0	0	0	0	1.17332e+06	0	0	1.16428e+06	0	0	1.19323e+06	0	0
P	3372	186.963	18.6033	C5H2N2O2S2	185.956					0	0	0	0	0	0	0	0	0	0	0	0	0	0	0	0	0	0	0	0	0	901067	0	0	0	1.40739e+06	0	0	0	0	0	0	1.07542e+06	0	0	0	0	0	0	0
P	6247	186.965	18.5332	C3H7O3PS2	185.958					0	0	0	0	0	0	0	0	0	0	0	0	0	0	0	0	0	0	0	0	0	0	0	0	0	0	0	0	0	0	0	0	0	0	0	0	0	0	0	0
P	515	186.966	18.6154	C3H9OP3S	185.959					0	879072	1.32645e+06	1.26516e+06	0	0	0	0	0	0	0	0	990532	0	0	982930	904245	0	0	0	0	0	0	0	0	0	996934	0	1.15875e+06	0	1.06321e+06	0	0	1.01885e+06	0	0	717933	0	0	0
P	1679	186.97	18.6215	C6H2O5S	185.962					0	0	0	0	0	0	1.08006e+06	0	0	792199	730801	0	0	0	0	0	0	0	0	0	0	0	0	0	0	0	0	995027	0	799845	0	0	0	0	0	0	0	0	0	0
P	2147	186.972	18.588	C2H2O10	185.964					0	0	0	0	0	0	0	801761	846097	0	0	0	0	0	0	0	0	0	0	0	0	0	0	0	0	1.02239e+06	0	0	0	0	0	0	0	0	0	0	0	0	0	0
P	6524	186.973	18.4998	C3H6O5S2	185.966					0	0	0	0	0	0	0	0	0	0	0	0	0	0	0	0	0	0	0	0	0	0	0	0	0	0	0	0	0	0	0	0	0	0	0	0	0	0	0	0
P	655	186.974	18.612	C4H2N4OS2	185.967	2.79933	Allantoin; (±)-form, 1,8-Di-Me	C6H10N4O3		0	34699.9	697935	791183	0	0	0	0	0	0	0	0	0	0	0	20920	0	0	0	0	0	0	0	0	0	0	0	0	197646	0	0	0	0	31593	0	0	101795	0	0	0
P	4059	187.073	9.41368	C5H15O5P	186.066					0	0	0	0	0	0	0	0	0	0	0	0	0	0	0	0	0	0	0	0	0	0	0	0	0	0	73982.8	0	0	0	68189.7	0	0	70027.8	0	69071.8	0	0	0	0
P	4311	187.076	9.42626	[M+Na-H] 21.9825 m/z adduct of 165.0945 m/z	186.069		2-Benzyl-3-hydroxypyrazine	C11H10N2O		0	0	0	0	0	0	0	0	0	0	0	0	0	0	0	0	0	0	0	0	0	0	0	0	0	0	0	78351.9	0	79930.6	0	0	0	0	82861	0	0	69946.4	0	0
P	3676	187.078	9.43471	[M+Na-H] 21.9825 m/z adduct of 165.0945 m/z	186.071		Dehydrotryptamine; (E)-form, Na-Formyl	C11H10N2O	Prod. by Pseudomonas aeruginosa	0	0	0	0	0	0	0	0	0	0	0	0	0	0	0	0	0	0	0	0	0	0	0	0	0	96341.8	0	0	0	0	0	0	0	0	0	0	0	0	0	0
P	4438	187.08	9.35191	C9H16P2	186.073		2,3-Dihydropyrrolo[2,1-b]quinazolin-9(1H)-one; 2,3-Didehydro, 9ξ-alcohol	C11H10N2O	Alkaloid from aerial parts of Galium aparine collected at the flowering period	0	11185.5	0	0	3226.07	14100.5	0	0	0	0	0	0	9445.81	14766.8	0	0	0	15332.5	0	0	0	0	0	0	0	0	0	0	97690.2	0	17590.7	93589.8	87568.8	18631.3	0	0	88319.7	0	0	90817.8
P	3987	187.082	9.41368	H11N8O2P	186.074		5-Hydroxy-1H-indole-3-acetic acid; Me ether, nitrile	C11H10N2O		0	0	0	0	0	0	0	0	0	0	0	0	0	0	0	0	0	0	0	0	0	0	0	0	0	0	96690.8	0	0	0	96547.5	0	0	95265.5	0	92370.8	0	0	0	0
P	5644	187.083	9.44342	C6H10N4O3	186.076	2.03776	6-Hydroxy-1H-indole-3-acetic acid; N-Me, nitrile	C11H10N2O	Constit. of the roots of Brassica rapa ssp. campestris	0	0	0	0	0	0	0	0	0	0	0	0	0	0	0	0	0	0	0	0	0	0	0	0	0	0	0	0	0	0	0	0	0	0	0	0	0	0	85023.1	0
P	4288	187.085	9.42817	[M+Na-H] 21.9825 m/z adduct of 165.1028 m/z	186.077		2,3,4,9-Tetrahydro-1H-pyrido[3,4-b]indol-1-one	C11H10N2O	Alkaloid from Evodia rutaecarpa. Also isol. from an Indonesian sponge	0	0	0	0	0	0	0	0	0	0	0	0	0	0	0	0	0	0	0	0	0	0	0	0	0	0	0	91681.8	0	91623.1	0	0	0	0	88779.4	0	0	83143.7	0	0
P	3687	187.087	9.43471	C11H10N2O	186.079	-0.142357	Desdamethine	C8H14N2OS	Prod. by Streptomyces caelestis with Methionine	0	0	0	0	0	0	0	0	0	0	0	0	0	0	0	0	0	0	0	0	0	0	0	0	0	90436.8	0	0	0	0	0	0	0	0	0	0	0	0	0	0
P	4452	187.089	9.33258	C2H15N6PS	186.082					0	13073.2	0	0	1414	15934.6	0	0	0	0	0	0	10005.2	12625.2	0	0	0	13275.3	0	0	0	0	0	0	0	0	0	0	85976.6	0	0	81112.6	78316.6	0	0	0	81245.7	0	0	77587.3
P	4026	187.09	9.41368	C8H14N2OS	186.083	2.60618				0	0	0	0	0	0	0	0	0	0	0	0	0	0	0	0	0	0	0	0	0	0	0	0	0	0	81268.7	0	0	0	75474.7	0	0	78450.5	0	74177.7	0	0	0	0
P	6036	187.098	12.0946	C2H16N6P2	186.091	2.87792	2,2-Dimethyl-6-vinyl-2H-benzopyran	C13H14O	Isol. from the oil of Baccharis dracunculifolia	0	0	0	0	0	0	0	0	0	0	0	0	0	0	0	0	0	0	0	0	0	0	0	0	0	0	0	0	0	0	0	0	0	0	0	0	0	0	0	76853.6
P	5597	187.1	12.0954	C8H15N2OP	186.093		1-Naphthol; Propyl ether	C13H14O		0	0	0	0	0	0	0	0	0	0	0	0	0	0	0	0	0	0	0	0	0	0	0	0	0	0	0	0	0	0	0	0	0	0	0	0	0	0	87461.4	0
P	4329	187.102	12.0854	C7H14N4S	186.095		2,8,10-Tridecatriene-4,6-diyn-1-ol	C13H14O	Isol. from Aethusa cynapium	0	0	0	0	0	0	0	0	0	0	0	0	0	0	0	0	0	0	0	0	0	0	0	0	0	0	0	71477.2	0	0	0	0	0	0	0	0	0	99651.8	0	0
P	3740	187.104	12.0825	C3H14N4O5	186.097		3,5,7-Tridecatriene-9,11-diyn-1-ol; (all-E)-form	C13H14O	Isol. from roots of Matricaria chamomilla (German chamomile) and Matricaria discoidea (pineapple weed)	0	0	0	0	0	0	0	0	0	0	0	0	0	0	0	0	0	0	0	0	0	0	0	0	0	79692.6	0	0	0	0	0	0	0	0	0	0	0	0	0	0
P	4457	187.105	11.894	C4H10N8O	186.098		3,5,11-Tridecatriene-7,9-diyn-1-ol; (all-E)-form	C13H14O	Isol. from roots and tubers of Dahlia scapigera	0	2578.55	2470.04	0	3426.25	0	0	0	0	0	0	0	2283	0	0	0	2109.8	0	0	0	0	0	0	1521.4	0	0	0	0	79707.3	0	0	75874.5	73101.4	0	0	0	79979.8	0	0	0
P	4016	187.107	12.068	C2H15N6O2P	186.1		3,5,11-Tridecatriene-7,9-diyn-1-ol; (3Z,5E,11E)-form	C13H14O		0	0	0	0	0	0	0	0	0	0	0	0	0	0	0	0	0	0	0	0	0	0	0	0	0	0	82181	0	0	0	68241.2	0	0	68166.2	0	0	0	0	0	113673
P	4914	187.109	12.0869	CH14N8OS	186.101		2-Tridecene-4,6,8-triyn-1-ol; (E)-form	C13H14O	Metabolite of Fistulina hepatica (beefsteak fungus)	0	0	0	0	0	0	0	0	0	0	0	0	0	0	0	0	0	0	0	0	0	0	0	0	0	0	0	0	0	0	0	0	0	0	0	72165.2	0	0	113420	0
P	4320	187.111	12.0783	C7H15N4P	186.103		4-Tridecene-7,9,11-triyn-1-ol; (Z)-form	C13H14O	Isol. from the flower heads of Chrysanthemum leucanthemum	0	0	0	0	0	0	0	0	0	0	0	0	0	0	0	0	0	0	0	0	0	0	0	0	0	0	0	74926.8	0	68100.6	0	0	0	0	0	0	0	109596	0	0
P	3757	187.112	12.0783	C13H14O	186.105	1.63182				0	0	0	0	0	0	0	0	0	0	0	0	0	0	0	0	0	0	0	0	0	0	0	0	0	73226.4	0	0	0	0	0	0	0	0	67231.6	0	0	0	0	0
P	4682	187.114	11.9147		186.106					0	2120.18	917.695	1645.39	2989.55	0	0	0	0	0	0	0	0	0	0	1604	1458.93	0	0	0	0	0	0	1869.24	0	0	0	0	76176.4	0	0	67509.7	66132.4	0	0	0	67715.3	0	0	0
P	5921	187.116	12.0946	C3H10N10	186.108					0	0	0	0	0	0	0	0	0	0	0	0	0	0	0	0	0	0	0	0	0	0	0	0	0	0	0	0	0	0	0	0	0	0	0	0	0	0	0	96767.2
P	5608	187.118	12.0954	CH15N8OP	186.11					0	0	0	0	0	0	0	0	0	0	0	0	0	0	0	0	0	0	0	0	0	0	0	0	0	0	0	0	0	0	0	0	0	0	0	0	0	0	86296.1	0
P	5313	187.119	12.0909	C7H14N4O2	186.112	1.58419	Virgilidone; Didehydro	C11H16N2O	Alkaloid from Virgilia divaricata and Virgilia oroboides (Leguminosae)	0	0	0	0	0	0	0	0	0	0	0	0	0	0	0	0	0	0	0	0	0	0	0	0	0	0	0	0	0	0	0	0	0	0	0	0	0	77614.1	0	0
P	6542	187.12	12.0948	H14N10S	186.113					0	0	0	0	0	0	0	0	0	0	0	0	0	0	0	0	0	0	0	0	0	0	0	0	0	0	0	0	0	0	0	0	0	0	0	0	0	0	0	0
P	6069	188.118	9.38967	C11H13N3	187.111	0.105881				0	0	0	0	0	8616.4	0	0	0	0	0	0	4282.1	11953.4	0	0	0	13554.6	0	0	0	0	0	0	0	0	0	0	20055.5	0	23417.6	22352.8	12718.6	16759.2	0	0	18039	0	0	82063.3
P	5368	188.122	9.4389	C8H17N3S	187.115					0	0	0	0	0	0	0	0	0	0	0	0	0	0	0	0	0	0	0	0	0	0	0	0	0	0	0	0	0	0	0	0	0	0	0	0	0	80012.3	0	0
P	6674	188.124	9.44273		187.117					0	0	0	0	0	0	0	0	0	0	0	0	0	0	0	0	0	0	0	0	0	0	0	0	0	0	0	0	0	0	0	0	0	0	0	0	0	0	0	0
P	6024	188.127	9.38967		187.12					0	0	0	0	0	7823.78	0	0	0	0	0	0	8702.96	13263.1	0	0	0	10220.4	0	0	0	0	0	0	0	0	0	0	18886.4	0	23257.7	22117.8	10852.8	15812.7	0	0	19521.5	0	0	85423.6
P	5339	193.132	10.4243	C5H17N6P	192.124					0	0	0	0	0	0	0	0	0	0	0	0	0	0	0	0	0	0	0	0	0	0	0	0	0	0	0	0	0	0	0	0	0	0	0	0	0	216141	0	0
P	6246	193.134	10.4215	C11H16N2O	192.126	0.424803				0	0	0	0	0	0	0	0	0	0	0	0	0	0	0	0	0	0	0	0	0	0	0	0	0	0	0	0	0	0	0	0	0	0	0	0	0	0	0	0
P	3759	193.135	10.2997	C9H21O2P	192.128					0	1937.98	974.255	1916.1	871.054	0	0	0	0	0	0	0	0	0	0	0	827.024	0	0	0	0	0	0	1616.44	0	170323	0	0	0	0	0	84557.2	180455	0	0	0	190245	0	0	0
P	4442	193.137	10.2187	C8H20N2OS	192.129					0	0	0	0	871.054	1684.65	0	0	0	0	0	0	1590.4	1875.62	0	0	0	817.517	0	0	0	0	0	0	0	0	0	0	186876	0	154842	181562	2231.99	218113	0	0	112626	0	0	383361
P	3947	193.138	10.3937	CH12N12	192.131					0	0	0	0	0	0	0	0	0	0	0	0	0	0	0	0	0	0	0	0	0	0	0	0	0	0	231815	0	0	0	212621	0	0	0	0	243861	0	0	450363	0
P	5044	193.14	10.4239	C5H16N6O2	192.133					0	0	0	0	0	0	0	0	0	0	0	0	0	0	0	0	0	0	0	0	0	0	0	0	0	0	0	0	0	0	0	0	0	0	0	0	0	514295	0	0
P	4197	193.141	10.3969	C5H16N6O2	192.134					0	0	0	0	0	0	0	0	0	0	0	0	0	0	0	0	0	0	0	0	0	0	0	0	0	0	0	287360	0	285128	0	0	0	0	318028	0	0	0	0	0
P	6125	193.143	10.427	C9H20O4	192.135					0	0	0	0	0	0	0	0	0	0	0	0	0	0	0	0	0	0	0	0	0	0	0	0	0	0	0	0	0	0	0	0	0	0	0	0	0	0	0	0
P	3553	193.144	10.3498	C10H16N4	192.137					0	1769.26	1938.36	2554.8	2162.49	0	0	0	0	0	0	0	0	0	0	0	1100.77	0	0	0	0	0	0	1097.2	0	343912	0	0	0	0	0	216521	364927	0	0	0	397574	0	0	0
P	4382	193.146	10.2482	C10H16N4	192.138					0	0	0	0	2162.49	1539.91	0	0	0	0	0	0	1470.42	3317.06	0	0	0	1456.53	0	0	0	0	0	0	0	0	0	0	365479	0	377966	364850	2000.44	453024	0	0	226299	0	0	769225
P	3849	193.147	10.3937	C8H21N2OP	192.14		6(7→8)-Abeo-12,13-dinor-1(10)-eremophilen-7-one; (ent-8α)-form	C13H20O	Constit. of Haitian vetiver oil (Vetiveria sp.)	0	0	0	0	0	0	0	0	0	0	0	0	0	0	0	0	0	0	0	0	0	0	0	0	0	0	405780	0	0	0	383220	0	0	0	0	457034	0	0	868496	0
P	5010	193.149	10.4239		192.142		6(7→8)-Abeo-12,13-dinor-6(8)-eremophilen-7-one; 10β-form	C13H20O	Constit. of Ligularia virgaurea	0	0	0	0	0	0	0	0	0	0	0	0	0	0	0	0	0	0	0	0	0	0	0	0	0	0	0	0	0	0	0	0	0	0	0	0	0	881531	0	0
P	4141	193.15	10.3969		192.143		11(7→8)-Abeo-12,13-dinor-1(10)-eremophilen-7-one; ent-form	C13H20O	Constit. of Haitian vetiver oil (Vetiveria sp.)	0	0	0	0	0	0	0	0	0	0	0	0	0	0	0	0	0	0	0	0	0	0	0	0	0	0	0	446051	0	434719	0	0	0	0	520307	0	0	0	0	0
P	6104	193.152	10.427	C4H16N8O	192.144		Cyclosantalal	C13H20O	Constit. of sandalwood oil	0	0	0	0	0	0	0	0	0	0	0	0	0	0	0	0	0	0	0	0	0	0	0	0	0	0	0	0	0	0	0	0	0	0	0	0	0	0	0	0
P	3513	193.153	10.2363		192.146		2,3-Diisopropyl-5-methylphenol	C13H20O	Constit. of the essential oil of Coridothymus capitatus (Spanish oregano)	0	2393.89	3519.1	5692.62	2443.85	0	0	0	0	0	0	0	0	0	0	0	1935.1	0	0	0	0	0	0	1470.85	0	462102	0	0	0	0	0	294322	494878	0	0	0	502343	0	0	0
P	4366	193.154	10.2264	C8H20N2O3	192.147		2,4-Diisopropyl-5-methylphenol	C13H20O	Constit. of the essential oil of Coridothymus capitatus (Spanish oregano)	0	0	0	0	2443.85	4822.28	0	0	0	0	0	0	2681.45	1749.92	0	0	0	2613.7	0	0	0	0	0	0	0	0	0	0	449168	0	272629	467829	4338.37	531797	0	0	329643	0	0	959433
P	3839	193.156	10.3937		192.149		2,6-Diisopropyl-3-methylphenol	C13H20O	Constit. of essential oils of Spanish oregano (Coridothymus capitatus) and Origanum spp.	0	0	0	0	0	0	0	0	0	0	0	0	0	0	0	0	0	0	0	0	0	0	0	0	0	0	445832	0	0	0	435672	0	0	0	0	528835	0	0	973081	0
P	5005	193.158	10.4239	C7H21N4P	192.151		2,4-Diisopropylphenol; Me ether	C13H20O		0	0	0	0	0	0	0	0	0	0	0	0	0	0	0	0	0	0	0	0	0	0	0	0	0	0	0	0	0	0	0	0	0	0	0	0	0	914823	0	0
P	4143	193.159	10.3969	C13H20O	192.152	2.47659	2,5-Epoxy-6,8-megastigmadiene; (2S,5R,6E,8E)-form	C13H20O	Constit. of Osmanthus spp.	0	0	0	0	0	0	0	0	0	0	0	0	0	0	0	0	0	0	0	0	0	0	0	0	0	0	0	415091	0	410340	0	0	0	0	515546	0	0	0	0	0
P	3529	193.161	10.4105		192.153					0	0	0	0	0	0	0	0	0	0	0	0	0	0	0	0	0	0	0	0	0	0	0	0	0	382873	0	0	0	0	0	0	0	0	0	0	0	0	0	0
P	4379	193.163	10.2274	C3H16N10	192.156					0	6141.25	0	0	7562.27	3882.4	0	0	0	0	0	0	3740.19	3921.18	0	0	1411.24	5967.3	0	0	0	0	0	0	0	0	0	0	347398	0	0	393016	416871	89021.3	0	0	414626	0	0	715370
P	3873	193.165	10.3937		192.157					0	0	0	0	0	0	0	0	0	0	0	0	0	0	0	0	0	0	0	0	0	0	0	0	0	0	315013	0	0	0	319948	0	0	428677	0	387290	0	0	670412	0
P	5022	193.167	10.4239		192.16					0	0	0	0	0	0	0	0	0	0	0	0	0	0	0	0	0	0	0	0	0	0	0	0	0	0	0	0	0	0	0	0	0	0	0	0	0	599550	0	0
P	4183	193.168	10.3969		192.161					0	0	0	0	0	0	0	0	0	0	0	0	0	0	0	0	0	0	0	0	0	0	0	0	0	0	0	268945	0	268284	0	0	0	0	325433	0	0	0	0	0
P	6127	193.169	10.427	C12H20N2	192.162					0	0	0	0	0	0	0	0	0	0	0	0	0	0	0	0	0	0	0	0	0	0	0	0	0	0	0	0	0	0	0	0	0	0	0	0	0	0	0	0
P	3583	193.171	10.188	C12H20N2	192.163					0	5304.74	6777.2	10217.8	5293.38	0	0	0	0	0	0	0	0	0	0	0	2551.77	0	0	0	0	0	0	2154.09	0	234126	0	0	0	0	0	240827	279661	0	0	0	239234	0	0	0
P	4404	193.172	10.2225	C10H25OP	192.165					0	0	0	0	5293.38	9651.93	0	0	0	0	0	0	6623.21	4758.12	0	0	0	2809.21	0	0	0	0	0	0	0	0	0	0	216053	0	133231	259592	4039.53	253502	0	0	140726	0	0	429411
P	3932	193.174	10.3937	C9H24N2S	192.166					0	0	0	0	0	0	0	0	0	0	0	0	0	0	0	0	0	0	0	0	0	0	0	0	0	0	186171	0	0	0	208962	0	0	0	0	204020	0	0	396204	0
P	5053	193.176	10.4239		192.169					0	0	0	0	0	0	0	0	0	0	0	0	0	0	0	0	0	0	0	0	0	0	0	0	0	0	0	0	0	0	0	0	0	0	0	0	0	348934	0	0
P	4252	193.177	10.3969	C6H20N6O	192.17					0	0	0	0	0	0	0	0	0	0	0	0	0	0	0	0	0	0	0	0	0	0	0	0	0	0	0	162479	0	172345	0	0	0	0	176946	0	0	0	0	0
P	3664	193.178	10.4105		192.171					0	0	0	0	0	0	0	0	0	0	0	0	0	0	0	0	0	0	0	0	0	0	0	0	0	137342	0	0	0	0	0	0	0	0	0	0	0	0	0	0
P	4443	193.181	10.2262	C10H24O3	192.173					0	5589.92	0	0	5890.88	3865.18	0	0	0	0	0	0	3797.73	5617.4	0	0	7347.15	5009.15	0	0	0	0	0	0	0	0	0	0	138362	0	0	186948	176252	44142.6	0	0	135921	0	0	257602
P	4030	193.182	10.3937	C9H25N2P	192.175					0	0	0	0	0	0	0	0	0	0	0	0	0	0	0	0	0	0	0	0	0	0	0	0	0	0	106207	0	0	0	129007	0	0	129845	0	113768	0	0	235199	0
P	5114	193.185	10.4243		192.177					0	0	0	0	0	0	0	0	0	0	0	0	0	0	0	0	0	0	0	0	0	0	0	0	0	0	0	0	0	0	0	0	0	0	0	0	0	203148	0	0
P	6251	193.187	10.4215		192.179					0	0	0	0	0	0	0	0	0	0	0	0	0	0	0	0	0	0	0	0	0	0	0	0	0	0	0	0	0	0	0	0	0	0	0	0	0	0	0	0
P	5904	193.19	10.2546		192.183					0	0	0	0	2373.77	3153.1	0	0	0	0	0	0	1545.49	3031.67	0	0	0	3667.75	0	0	0	0	0	0	0	0	0	0	73529.7	0	46977.9	81873.3	1864.92	40215.9	0	0	59023.9	0	0	129367
P	5627	193.192	10.4108	C9H24N2O2	192.185					0	0	0	0	0	0	0	0	0	0	0	0	0	0	0	0	0	0	0	0	0	0	0	0	0	0	0	0	0	0	0	0	0	0	0	0	0	0	108912	0
P	5371	193.194	10.4231		192.186					0	0	0	0	0	0	0	0	0	0	0	0	0	0	0	0	0	0	0	0	0	0	0	0	0	0	0	0	0	0	0	0	0	0	0	0	0	88187.7	0	0
P	5293	194.15	10.4243	C7H19N3O3	193.143					0	0	0	0	0	0	0	0	0	0	0	0	0	0	0	0	0	0	0	0	0	0	0	0	0	0	0	0	0	0	0	0	0	0	0	0	0	114291	0	0
P	6313	194.152	10.4215	C6H20N5P	193.145					0	0	0	0	0	0	0	0	0	0	0	0	0	0	0	0	0	0	0	0	0	0	0	0	0	0	0	0	0	0	0	0	0	0	0	0	0	0	0	0
P	5932	194.155	10.1494		193.148		1,5-Dihydro-2,4,6(3H)-pteridinetrione; 1-Me	C7H6N4O3		0	0	0	0	4681.76	6858.44	0	0	0	0	0	0	4789.75	6270.38	0	0	0	3316.42	0	0	0	0	0	0	0	0	0	0	43643.6	0	6038.31	47893	29783	52014.6	0	0	40284.9	0	0	131380
P	5584	194.158	10.4108	C9H23NOS	193.15		6-(Hydroxymethyl)-2,4(1H,3H)-pteridinedione	C7H6N4O3	Isol. from leaves of Spinacia oleracea	0	0	0	0	0	0	0	0	0	0	0	0	0	0	0	0	0	0	0	0	0	0	0	0	0	0	0	0	0	0	0	0	0	0	0	0	0	0	140084	0
P	5204	194.159	10.4243	C2H15N11	193.152		2,4,7(1H,3H,8H)-Pteridinetrione; 1-Me	C7H6N4O3		0	0	0	0	0	0	0	0	0	0	0	0	0	0	0	0	0	0	0	0	0	0	0	0	0	0	0	0	0	0	0	0	0	0	0	0	0	136078	0	0
P	6311	194.161	10.4215	C6H19N5O2	193.154		2,4,7(1H,3H,8H)-Pteridinetrione; 8-Me	C7H6N4O3	Constit. of the Japanese firefly Luciola cruciata	0	0	0	0	0	0	0	0	0	0	0	0	0	0	0	0	0	0	0	0	0	0	0	0	0	0	0	0	0	0	0	0	0	0	0	0	0	0	0	0
P	5999	194.164	10.1995	C11H19N3	193.157					0	0	0	0	14695.7	3329.64	0	0	0	0	0	0	2821.93	3300.83	0	0	0	3801.6	0	0	0	0	0	0	0	0	0	0	62175.7	0	1931.43	49163.2	25481.3	42491.2	0	0	38516	0	0	104862
P	5664	194.166	10.4275	C9H24NOP	193.159					0	0	0	0	0	0	0	0	0	0	0	0	0	0	0	0	0	0	0	0	0	0	0	0	0	0	0	0	0	0	0	0	0	0	0	0	0	0	103130	0
P	5336	194.168	10.4216	C8H23N3S	193.161					0	0	0	0	0	0	0	0	0	0	0	0	0	0	0	0	0	0	0	0	0	0	0	0	0	0	0	0	0	0	0	0	0	0	0	0	0	96832.9	0	0
P	3443	195.049	7.94087	C10H12P2	194.042					0	0	0	0	0	0	0	0	0	0	0	0	0	0	0	0	0	0	0	0	0	0	0	0	62553.5	0	0	0	0	0	0	0	0	0	0	0	0	0	0	0
P	407	195.051	7.92466	C7H14O2S2	194.044	-1.78884				0	102271	68800.9	70058.9	91455.4	0	0	0	0	0	0	0	0	0	0	0	93553.5	0	0	0	0	0	0	163689	0	95270.1	0	0	0	0	0	0	0	0	0	0	107230	0	0	0
P	1099	195.053	7.91912	C5H11N2O4P	194.045		1-Vinyl-β-carboline	C13H10N2	Alkaloid from Pavetta lanceolata (Rubiaceae), the bryozoans Cribricellina cribraria and Costaticella hastata and from Soulamea raxinifolia and Pavetta lanceolata	0	0	0	0	0	139850	0	0	0	0	0	0	118288	148834	0	0	0	154217	0	0	0	0	0	0	0	0	0	0	165893	0	0	173756	136446	0	0	0	0	0	0	119227
P	1502	195.054	7.92288	C6H7N6P	194.047					0	0	0	0	0	0	205634	0	0	0	0	174150	0	0	419773	0	0	0	228396	0	0	0	0	0	0	0	0	0	0	0	251039	0	0	216330	0	233868	0	0	193245	0
P	1869	195.056	7.92795	C4H12N4OP2	194.048					0	0	0	0	0	0	0	355145	0	302421	235742	0	0	0	0	0	0	0	0	266616	344568	0	0	0	0	0	327057	0	0	0	0	0	0	0	0	0	0	348919	0	0
P	2287	195.057	7.9206	C3H11N6PS	194.05					0	0	0	0	0	0	0	0	390675	0	0	0	0	0	0	0	0	0	0	0	0	650467	502117	0	0	0	0	638803	0	562250	0	0	0	0	592263	0	0	0	0	0
P	2881	195.058	7.93546	CH6N8O4	194.051					0	0	0	0	0	0	0	0	0	0	0	0	0	0	0	732790	0	0	0	0	0	0	0	0	750722	0	0	0	0	0	0	0	0	0	0	0	0	0	0	0
							2-Amino-2-deoxyglucose; D-form, Oxime	C6H14N2O5
P	127	195.06	7.92466	C2H2N12	194.053					0	1.0524e+06	833810	781076	989934	0	0	0	0	0	0	0	0	0	0	0	998753	0	0	0	0	0	0	1.37699e+06	0	1.04992e+06	0	0	0	0	0	0	0	0	0	0	1.02109e+06	0	0	0
P	909	195.062	7.91907	C7H17P3	194.054					0	0	0	0	0	1.28374e+06	0	0	0	0	0	0	1.14338e+06	0	0	0	0	0	0	0	0	0	0	0	0	0	0	0	0	0	0	1.52308e+06	0	0	0	0	0	0	0	0
P	2738	195.09	7.92456	C5H14N4O2S	194.083		3-(2-Pyrrolidinyl)pyridine; (S)-form, N'-Nitroso	C9H12N3O2		0	0	0	0	0	0	0	0	0	0	0	0	0	0	6.06286e+06	0	0	0	0	0	0	0	0	0	0	0	6.84831e+06	0	0	0	0	0	0	0	0	0	0	0	0	0
P	4988	195.092	7.93636	C13H10N2	194.084	-0.247907	2-Acetyl-4,4,6-trimethyl-1,3-cyclohexanedione; 4,5-Didehydro	C11H14O3	Isol. from Backhousia angustifolia, also in trace amts. in Backhousia myrtifolia and Darwinia procera	0	0	0	0	0	0	0	0	0	0	0	0	0	0	0	0	0	0	0	0	0	0	0	0	0	0	0	0	0	0	0	0	0	0	0	0	0	6.53759e+06	0	0
P	3322	195.093	7.92189	C11H15OP	194.086		Auxofuran; (S)-form	C11H14O3	Prod. by Streptomyces strain AcH 505	0	0	0	0	0	0	0	0	0	0	0	0	0	0	0	0	0	0	0	0	0	6.07946e+06	0	0	5.87408e+06	0	0	6.57705e+06	0	6.02787e+06	0	0	0	0	0	0	0	0	0	0
P	2860	195.094	7.92988	C2H10N8O3	194.087		5-Butyl-6-methyl-2H-pyran-2-one; 4-Methoxy, 2',3'-didehydro(E-)	C11H14O3	Prod. by Alternaria infectoria BA1293 and an unidentified endophytic fungus	0	0	0	0	0	0	0	0	0	0	0	0	0	0	0	5.68605e+06	0	0	0	0	0	0	0	5.32258e+06	0	0	0	0	0	0	0	0	0	0	0	0	0	0	0	0
P	96	195.095	7.92674	C10H14N2S	194.088		5-Butyl-6-methyl-2H-pyran-2-one; 4-Methoxy, 2',3'-didehydro(Z-)	C11H14O3	Prod. by an unidentified endophytic fungus	0	5.01999e+06	6.26358e+06	6.03201e+06	5.43604e+06	0	0	0	0	0	0	0	0	0	0	0	5.44687e+06	0	0	0	0	0	0	4.9369e+06	0	6.70966e+06	0	0	0	0	0	0	0	0	0	0	5.72578e+06	0	0	0
P	883	195.097	7.92305	C6H14N2O5	194.09	-2.08418	3,4-Dihydro-3,6-dihydroxy-2,2-dimethyl-2H-1-benzopyran; (-)-form	C11H14O3	Prod. by the marine-derived Acremonium murorum	0	0	0	0	0	4.94775e+06	0	0	0	0	0	0	4.93334e+06	5.08594e+06	0	0	0	5.27155e+06	0	0	0	0	0	0	0	0	0	0	5.31936e+06	0	0	5.48976e+06	5.82265e+06	5.97486e+06	0	0	0	0	0	5.43016e+06
P	1344	195.099	7.92495	C7H18N2S2	194.091		2,3-Dihydro-2,2-dimethyl-2H-1-benzopyran-4,6-diol; (ξ)-form	C11H14O3	Constit. of the roots of Gynura elliptica	0	0	0	0	0	0	4.81468e+06	0	0	0	0	4.78005e+06	0	0	4.3592e+06	0	0	0	4.93125e+06	0	0	0	0	0	0	0	0	0	0	0	5.48085e+06	0	0	0	0	5.31161e+06	0	0	5.17924e+06	0
P	1784	195.1	7.92946	C5H15N4O2P	194.093	-0.792568	3,4-Dihydro-3-methyl-1H-2-benzopyran-6,8-diol; (-)-form, 8-Me ether	C11H14O3	Prod. by Penicillium sp. FO-2295 and a marine-derived Alternaria sp. HS-3	0	0	0	0	0	0	0	4.63655e+06	0	4.38227e+06	4.50202e+06	0	0	0	0	0	0	0	0	4.85559e+06	4.51766e+06	0	0	0	0	0	5.03882e+06	0	0	0	0	0	0	0	0	0	0	4.64592e+06	0	0
P	2219	195.102	7.92254	C11H14O3	194.095	1.31906	Xialenone C; 3a,6a-Dideoxy, 3a,6a-didehydro, 2α,3α-dihydro	C11H14O3	Prod. by Streptomyces sp. GT 061169	0	0	0	0	0	0	0	0	4.40322e+06	0	0	0	0	0	0	0	0	0	0	0	0	4.34896e+06	4.77485e+06	0	4.18193e+06	0	0	4.47813e+06	0	4.32564e+06	0	0	0	0	0	0	0	0	0	0
P	2861	195.103	7.92432	C4H14N6OS	194.096		2-Amino-3-(aminomethylphenyl)propanoic acid; (S)-form	C10H14N2O2	Isol. from seeds of Combretum zeyheri	0	0	0	0	0	0	0	0	0	0	0	0	0	0	0	4.06498e+06	0	0	0	0	0	0	0	3.64654e+06	0	0	0	0	0	0	0	0	0	0	0	0	0	0	0	0
P	103	195.104	7.92466	C10H15N2P	194.097		2-Amino-3-(4-aminophenyl)propanoic acid; (R)-form, Me ester	C10H14N2O2		0	3.54474e+06	4.33885e+06	3.89243e+06	3.88768e+06	0	0	0	0	0	0	0	0	0	0	0	3.88954e+06	0	0	0	0	0	0	3.51341e+06	0	4.17615e+06	0	0	0	0	0	0	0	0	0	0	4.13257e+06	0	0	0
P	889	195.106	7.92138	CH10N10O2	194.099		Cyclo(prolylprolyl); (5aS,10aS)-form	C10H14N2O2	Constit. of roasted cocoa nibs and roasted malt; also from the tubers of Pinellia pedatisecta. Prod. by Aspergillus fumigatus and Pseudoalteromonas haloplanktis	0	0	0	0	0	3.5766e+06	0	0	0	0	0	0	3.6704e+06	3.607e+06	0	0	0	4.01657e+06	0	0	0	0	0	0	0	0	0	0	3.81201e+06	0	0	3.88223e+06	3.85065e+06	4.10779e+06	0	0	0	0	0	3.40824e+06
P	1350	195.108	7.92495	C7H19N2PS	194.1		Cyclo(prolylprolyl); (5aR,10aS)-form	C10H14N2O2		0	0	0	0	0	0	3.38781e+06	0	0	0	0	3.4678e+06	0	0	3.08076e+06	0	0	0	3.4758e+06	0	0	0	0	0	0	0	0	0	0	0	3.99945e+06	0	0	0	0	3.67653e+06	0	0	3.54103e+06	0
P	1790	195.109	7.92795	C5H14N4O4	194.102		5-Hydroxy-3,4'-dimethyl-[1,2'-bipyrrole]-2,5'(2'H,5H)-dione; 5-Deoxy, 3',4'-dihydro	C10H14N2O2	Isol. from the petals of Lilium candidum (Liliaceae)	0	0	0	0	0	0	0	3.23076e+06	0	3.02027e+06	3.12147e+06	0	0	0	0	0	0	0	0	3.58232e+06	3.12602e+06	0	0	0	0	0	3.51778e+06	0	0	0	0	0	0	0	0	0	0	2.86859e+06	0	0
P	2227	195.111	7.92306	C6H10N8	194.104		N-Hydroxyglycine; Methylamide, O-benzyl	C10H14N2O2		0	0	0	0	0	0	0	0	2.81828e+06	0	0	0	0	0	0	0	0	0	0	0	0	2.66709e+06	2.8391e+06	0	2.63112e+06	0	0	2.82438e+06	0	2.80337e+06	0	0	0	0	3.57176e+06	0	0	0	0	0
P	2863	195.112	7.92432	C4H15N6OP	194.105		Laccarin	C10H14N2O2	Alkaloid from fruit bodies of the mushrooms Lactarius subplinthogalus and Laccaria vinaceoavellanea	0	0	0	0	0	0	0	0	0	0	0	0	0	0	0	2.64443e+06	0	0	0	0	0	0	0	2.13327e+06	0	0	0	0	0	0	0	0	0	0	0	0	0	0	0	0
P	111	195.113	7.92257	C3H14N8S	194.106	1.84885	Pilocarpine; N-De-Me	C10H14N2O2	Alkaloid from the leaves of Pilocarpus jaborandi (Rutaceae)	0	2.17081e+06	2.80469e+06	2.39915e+06	2.42169e+06	0	0	0	0	0	0	0	0	0	0	0	2.41544e+06	0	0	0	0	0	0	2.05532e+06	0	2.63774e+06	0	0	0	0	0	0	0	0	0	0	2.44232e+06	0	0	0
P	3575	195.114	7.00743	C3H14N8S	194.106					0	293412	175873	0	50465.4	0	0	0	0	0	0	0	0	0	0	0	420260	0	0	0	0	0	0	0	0	778484	0	0	0	0	0	0	0	0	0	0	411069	0	0	372112
P	899	195.115	7.92283	C8H19O3P	194.108					0	0	0	0	0	2.05544e+06	0	0	0	0	0	0	2.21404e+06	2.24839e+06	0	0	0	2.27185e+06	0	0	0	0	0	0	0	0	0	0	2.25799e+06	0	0	2.23715e+06	2.31373e+06	0	0	0	0	0	0	2.15329e+06
P	1360	195.116	7.92288	C7H18N2O2S	194.109		Arabinitol; L-form, 2,3,4-Tri-Me	C8H18O5		0	0	0	0	0	0	1.97151e+06	0	0	0	0	2.01114e+06	0	0	1.5917e+06	0	0	0	2.00564e+06	0	0	0	0	0	0	0	0	0	0	0	1.97036e+06	0	0	1.91004e+06	0	2.00192e+06	0	0	1.97911e+06	0
P	3977	195.117	10.7604	C15H14	194.109		Rhamnitol; L-form, 2,5-Di-Me	C8H18O5		0	0	0	0	0	0	0	0	0	0	0	0	0	0	0	0	0	0	0	0	0	0	0	0	0	0	567520	0	0	0	0	0	0	0	0	0	0	0	0	0
P	1803	195.118	7.92795	C7H20N2P2	194.111		Xylitol; 2,3,4-Tri-Me	C8H18O5		0	0	0	0	0	0	0	1.63776e+06	0	1.7007e+06	1.73148e+06	0	0	0	0	0	0	0	0	1.91703e+06	1.61249e+06	0	0	0	0	0	1.91043e+06	0	0	0	0	0	0	0	0	0	0	1.53953e+06	0	0
P	4172	195.12	10.7661	C4H14N6O3	194.112					0	0	0	0	0	0	0	0	0	0	0	0	0	0	0	0	0	0	0	0	0	0	0	0	0	0	0	608322	0	630415	0	0	0	0	604982	0	0	0	0	0
P	2238	195.12	7.92108	C4H14N6O3	194.112		3-(2-Hydroxyethyl)-4-methyl-1,2,3,4-pentanetetrol	C8H18O5	Constit. of Thevetia peruviana	0	0	0	0	0	0	0	0	1.46607e+06	0	0	0	0	0	0	0	0	0	0	0	0	1.36247e+06	1.41962e+06	0	0	0	0	1.46945e+06	0	1.48753e+06	0	0	0	0	1.51067e+06	0	0	0	0	0
P	2870	195.121	7.92846	C12H18S	194.113		Tetraethylene glycol	C8H18O5		0	0	0	0	0	0	0	0	0	0	0	0	0	0	0	1.32006e+06	0	0	0	0	0	0	0	959837	1.27818e+06	0	0	0	0	0	0	0	0	0	0	0	0	0	0	0
P	763	195.121	6.6075	C12H18S	194.114					0	0	0	194406	0	0	0	0	0	0	0	0	0	0	0	0	0	0	0	0	0	0	0	0	0	0	0	0	0	0	0	0	0	0	0	0	0	0	0	0
P	128	195.122	7.92466	C8H18O5	194.115					0	978264	1.29077e+06	1.12912e+06	1.04126e+06	0	0	0	0	0	0	0	0	0	0	0	1.08554e+06	0	0	0	0	0	0	884564	0	1.17881e+06	0	0	0	0	0	0	0	0	0	0	1.06546e+06	0	0	0
P	3507	195.122	10.4098	C8H18O5	194.115	-2.52589				0	8175.92	6240.59	7411.54	1.04503e+06	0	0	0	0	0	0	0	0	0	0	0	11848	0	0	0	0	0	0	7709	0	600696	0	0	0	0	0	426423	704761	0	0	0	720226	0	0	0
P	500	195.122	6.55718	C8H18O5	194.115	-1.12572	1,2,3,4-Tetrahydro-6,7-dihydroxyisoquinoline; N,N-Di-Me	C11H16NO2		0	398084	207286	0	189149	0	0	0	0	0	0	0	0	0	0	0	412500	0	0	0	0	0	0	0	0	280941	0	0	0	0	0	0	0	0	0	0	238634	0	0	0
P	4583	195.123	10.4097	C3H15N8P	194.116					0	8175.92	0	0	1.04503e+06	11082	0	0	0	0	0	0	8088.8	16766	0	0	11848	10364.9	0	0	0	0	0	0	0	0	0	0	474550	0	0	721427	376373	494672	0	0	366460	0	0	14017.5
P	920	195.124	7.92283	C9H22S2	194.117					0	0	0	0	0	875695	0	0	0	0	0	0	902673	940350	0	0	0	938382	0	0	0	0	0	0	0	0	0	0	1.01907e+06	0	0	976047	1.03639e+06	0	0	0	0	0	0	1.01511e+06
P	1301	195.124	6.61698	C9H14N4O	194.117					0	0	0	0	0	165353	0	0	0	0	0	0	346371	299627	0	0	0	326927	0	0	0	0	0	0	0	0	0	0	0	0	0	0	556786	0	0	0	0	0	0	0
P	4353	195.124	10.7661	C9H14N4O	194.117					0	0	0	0	0	0	0	0	0	0	0	0	0	0	0	0	0	0	0	0	0	0	0	0	0	0	0	0	702583	0	878617	0	0	773392	0	0	0	0	0	0
P	1751	195.125	6.60518	C7H19N2O2P	194.118	-1.00757				0	0	0	0	0	0	154381	0	0	0	0	167625	0	0	187829	0	0	0	228734	0	0	0	0	0	0	0	0	0	426297	0	315524	423906	0	436364	0	0	0	0	0	0
P	1386	195.125	7.92288	C7H19N2O2P	194.118	-0.658755				0	0	0	0	0	0	794665	0	0	0	0	817305	0	0	594021	0	0	0	790434	0	0	0	0	0	0	0	0	0	0	0	843750	0	0	822592	0	887129	0	0	964684	0
P	3798	195.125	10.7772	C7H19N2O2P	194.118	-0.27064				0	0	0	0	0	0	0	0	0	0	0	0	0	0	0	0	0	0	0	0	0	0	0	0	0	0	948639	0	0	0	0	0	0	0	0	942086	0	0	0	0
P	2190	195.127	6.62391	C6H18N4OS	194.119					0	0	0	0	0	0	0	133809	0	0	143682	0	0	0	0	0	0	0	0	226665	206015	0	0	0	0	0	205990	0	0	0	0	0	0	0	0	0	0	0	0	0
P	1827	195.127	7.92795	C6H18N4OS	194.119					0	0	0	0	0	0	0	652859	0	646101	690619	0	0	0	0	0	0	0	0	758064	660932	0	0	0	0	0	781086	0	0	0	0	0	0	0	0	0	0	712550	0	0
P	3361	195.128	6.61535	C6H18N4OS	194.121					0	0	0	0	0	0	0	0	0	0	0	0	0	0	0	0	0	0	0	0	0	169703	186894	0	0	0	0	0	0	0	0	0	0	0	0	0	0	320134	0	0
P	4089	195.128	10.7661		194.121					0	0	0	0	0	0	0	0	0	0	0	0	0	0	0	0	0	0	0	0	0	0	0	0	0	0	0	1.19156e+06	0	1.20496e+06	0	0	0	0	1.2365e+06	0	0	0	0	0
P	2265	195.129	7.92108		194.121					0	0	0	0	0	0	0	0	590530	0	0	0	0	0	0	0	0	0	0	0	0	508661	574409	0	0	0	0	573178	0	577321	0	0	0	0	603433	0	0	0	0	0
P	2974	195.129	6.61749	C12H19P	194.122					0	0	0	0	0	0	0	0	0	0	0	0	0	0	0	168758	0	0	0	0	0	0	0	136871	152803	0	0	169014	0	203417	0	0	0	0	268353	0	0	0	0	0
P	2884	195.13	7.92846	C12H19P	194.122					0	0	0	0	0	0	0	0	0	0	0	0	0	0	0	489732	0	0	0	0	0	0	0	349509	478536	0	0	0	0	0	0	0	0	0	0	0	0	0	0	0
P	6452	195.13	6.27412	C12H19P	194.123					0	0	0	0	0	0	0	0	0	0	0	0	0	0	0	0	0	0	0	0	0	0	0	0	0	0	0	0	0	0	0	0	0	0	0	0	0	0	0	0
P	3460	195.131	10.6796	C3H14N8O2	194.123					0	17207.6	4884.46	2328.63	0	0	0	0	0	0	0	0	0	0	0	3020.5	17306.9	0	0	0	0	0	0	8800.51	0	1.44469e+06	0	0	0	0	0	3904.4	1.30305e+06	0	0	0	1.25094e+06	0	0	0
P	186	195.131	7.92049	C3H14N8O2	194.124					0	375179	498414	447247	412545	0	0	0	0	0	0	0	0	0	0	0	427632	0	0	0	0	0	0	354549	0	456528	0	0	0	0	0	0	0	0	0	0	461237	0	0	0
P	3113	195.131	7.079	C3H14N8O2	194.124					0	94282.8	116069	0	14800.8	0	0	0	0	0	0	0	0	0	0	0	141574	0	0	0	0	0	0	0	0	137570	0	0	0	0	0	0	0	0	0	0	221690	0	0	0
P	4565	195.132	10.4713	C3H14N8O2	194.124					0	17207.6	4884.46	0	413100	0	0	0	0	0	0	0	2724.9	0	0	0	17306.9	0	0	0	0	0	0	8800.51	0	232638	0	0	55589.1	0	0	1.54608e+06	1.45072e+06	0	0	0	1.54611e+06	0	0	17407.2
P	2731	195.133	6.99527	C9H23PS	194.125					0	0	0	0	14800.8	93191.1	0	0	0	0	0	0	94218.8	131474	0	0	0	135081	0	0	0	0	0	0	0	0	0	0	55022.7	0	0	8152.78	130445	0	0	0	158251	0	0	247903
P	974	195.133	7.92283	C9H23PS	194.125		2-Acetoxy-p-mentha-1,8-diene; (R)-form	C12H18O2	Isol. from grapefruit oil	0	0	0	0	0	347264	0	0	0	0	0	0	354429	361884	0	0	0	356445	0	0	0	0	0	0	0	0	0	0	400607	0	0	376094	397001	0	0	0	0	0	0	404574
P	4343	195.133	10.7661	C9H23PS	194.126		Anastrephin	C12H18O2	Component of the male pheromone of the Caribbean fruit fly Anastrepha suspensa and the Mexican fruit fly Anastrepha ludens	0	0	0	0	0	0	0	0	0	0	0	0	0	0	0	0	0	0	0	0	0	0	0	0	0	0	0	0	1.69966e+06	0	1.80863e+06	0	0	1.72644e+06	0	0	0	0	0	0
P	1453	195.134	7.92288	C7H18N2O4	194.127		Artemisia lactone	C12H18O2	Constit. of Artemisia vulgaris	0	0	0	0	0	0	309262	0	0	0	0	318357	0	0	232915	0	0	0	309543	0	0	0	0	0	0	0	0	0	0	0	341550	0	0	348578	0	365690	0	0	329677	0
P	3779	195.134	10.7772	C7H18N2O4	194.127		3-Butylhexahydro-1(3H)-isobenzofuranone; (3S,3aS,7aR)-form, 6,7-Didehydro	C12H18O2	Constit. of the roots of Cnidium officinale and from Ligusticum sinense	0	0	0	0	0	0	0	0	0	0	0	0	0	0	0	0	0	0	0	0	0	0	0	0	0	0	1.97276e+06	0	0	0	0	0	0	0	0	1.86944e+06	0	0	0	0
P	5555	195.135	6.62443	C8H14N6	194.128		3-Butylhexahydro-1(3H)-isobenzofuranone; (3S,3aS,7aR)-form, 7,7a-Didehydro	C12H18O2	Constit. of Apium graveolens and Ligusticum officinale	0	0	0	0	0	0	0	0	0	0	0	0	0	0	0	0	0	0	0	0	0	0	0	0	0	0	0	0	0	0	0	0	0	0	0	0	0	0	208083	0
P	1898	195.136	7.92795	C8H14N6	194.128		Clavukerin C	C12H18O2	Constit. of the soft coral Clavularia koellikeri	0	0	0	0	0	0	0	256153	0	250406	268909	0	0	0	0	0	0	0	0	296993	253509	0	0	0	0	0	320828	0	0	0	0	0	0	0	0	0	0	277366	0	0
P	5258	195.136	6.63428	C6H19N4OP	194.129		Clavularin A; 7-Epimer	C12H18O2	Constit. of Clavularia koellikeri	0	0	0	0	0	0	0	0	0	0	0	0	0	0	0	0	0	0	0	0	0	0	0	0	0	0	0	0	0	0	0	0	0	0	0	0	0	171995	0	0
P	4076	195.137	10.7661	C6H19N4OP	194.13		2,4,7-Decatrienoic acid; (2E,4E,7Z)-form, Et ester	C12H18O2	Constit. of various fruits incl. Durio zibethinus and pears Pyrus sp.	0	0	0	0	0	0	0	0	0	0	0	0	0	0	0	0	0	0	0	0	0	0	0	0	0	0	0	2.24526e+06	0	2.16016e+06	0	0	0	0	2.29687e+06	0	0	0	0	0
P	2322	195.137	7.92108	C6H19N4OP	194.13	-2.73455	5,5-Dimethyl-6-methylenebicyclo[2.2.1]heptan-2-ol; (1S,2R,4S)-form, Ac	C12H18O2	From Chrysanthemum japonense	0	0	0	0	0	0	0	0	229031	0	0	0	0	0	0	0	0	0	0	0	0	193072	221969	0	0	0	0	229909	0	231708	0	0	0	0	254510	0	0	0	0	0
P	6544	195.138	6.62406	C12H18O2	194.13	-1.30664	p-Mentha-1,8-dien-10-ol; (S)-form, Ac	C12H18O2	Isol. from grapefruit, lemon and mandarin oils	0	0	0	0	0	0	0	0	0	0	0	0	0	0	0	0	0	0	0	0	0	0	0	0	0	0	0	0	0	0	0	0	0	0	0	0	0	0	0	0
P	2901	195.139	7.92846	C5H18N6S	194.131					0	0	0	0	0	0	0	0	0	0	0	0	0	0	0	189572	0	0	0	0	0	0	0	120195	179173	0	0	0	0	0	0	0	0	0	0	0	0	0	0	0
P	318	195.14	7.92049		194.133					0	142687	203299	178175	156947	0	0	0	0	0	0	0	0	0	0	0	159104	0	0	0	0	0	0	128990	0	168982	0	0	0	0	0	0	0	0	0	0	172301	0	0	0
P	3451	195.14	10.3981		194.133		Baptisia Alkaloid P2	C11H18N2O	Isol. from Baptisia australis and Baptisia perfoliata	0	10960.4	8851.71	9217.64	164064	0	0	0	0	0	0	0	0	0	0	0	7232.56	0	0	0	0	0	0	20586.5	0	2.56883e+06	0	0	0	0	0	2.38153e+06	2.47642e+06	0	0	0	2.58541e+06	0	0	0
P	4340	195.141	10.0777	C9H22O2S	194.134		3-Hydroxy-2-isopropyl-5-(2-methylpropyl)pyrazine	C11H18N2O	Prod. by Staphylococcus aureus	0	0	0	0	164064	21746.9	0	0	0	0	0	0	20185	29640.3	0	0	0	28114.4	0	0	0	0	0	0	0	0	0	0	2.50972e+06	0	0	2.51648e+06	25359.6	2.64479e+06	0	0	22780.9	0	0	41225.4
P	1124	195.142	7.92098	C9H22O2S	194.134		5-Methyl-3-(3-methylbutyl)-2-pyrazinemethanol	C11H18N2O	Alkaloid from the flowers of Drakaea livida. Sex pheromone of the wasp, Zaspilothynnus sp.	0	0	0	0	0	131882	0	0	0	0	0	0	135054	135595	0	0	0	125759	0	0	0	0	0	0	0	0	0	0	140259	0	0	139527	162315	0	0	0	0	0	0	145421
P	3776	195.143	10.7716	C9H24P2	194.135		1,1',4,4',5,5',6,6'-Octahydro-5-methoxy-2,3'-bipyridine; (ξ)-form	C11H18N2O	Alkaloid from the exudate of Jatropha gossypifolia (Euphorbiaceae)	0	0	0	0	0	0	0	0	0	0	0	0	0	0	0	0	0	0	0	0	0	0	0	0	0	0	2.75288e+06	0	0	0	2.5517e+06	0	0	0	0	2.67147e+06	0	0	0	0
P	1634	195.143	7.92495	C9H24P2	194.136		Tenuamine	C11H18N2O		0	0	0	0	0	0	114225	0	0	0	0	116131	0	0	74135.9	0	0	0	105373	0	0	0	0	0	0	0	0	0	0	0	0	0	0	142358	0	133590	0	0	115076	0
P	2103	195.145	7.93158	C6H18N4O3	194.137		Tetrahydrocytisine	C11H18N2O	Alkaloid from Thermopsis chinensis (Leguminosae)	0	0	0	0	0	0	0	85085.7	0	85497.2	92112.1	0	0	0	0	0	0	0	0	99072	81054.5	0	0	0	0	0	0	0	0	0	0	0	0	0	0	0	0	90872.8	0	0
P	2482	195.146	7.93309	C6H18N4O3	194.139		Virgilidone	C11H18N2O	Alkaloid from Virgilia divaricata and Virgilia oroboides (Leguminosae)	0	0	0	0	0	0	0	0	74576.3	0	0	0	0	0	0	0	0	0	0	0	0	0	65312.7	0	0	0	0	0	0	0	0	0	0	0	0	0	0	0	0	0
P	4074	195.146	10.7661	C6H18N4O3	194.139					0	0	0	0	0	0	0	0	0	0	0	0	0	0	0	0	0	0	0	0	0	0	0	0	0	0	0	2.62481e+06	0	2.66761e+06	0	0	0	0	2.68576e+06	0	0	0	0	0
P	3450	195.149	10.4764	C11H18N2O	194.142	-2.1236				0	12155.1	3075.08	8750.25	55201.6	0	0	0	0	0	0	0	0	0	0	968.127	7235.1	0	0	0	0	0	0	14450.1	0	2.52406e+06	0	0	0	0	0	2.32187e+06	2.5536e+06	0	0	0	2.52756e+06	0	0	0
P	4341	195.15	10.766	C9H23O2P	194.143					0	0	0	0	0	0	0	0	0	0	0	0	0	0	0	0	0	0	0	0	0	0	0	0	0	0	0	0	2.39097e+06	0	0	2.42389e+06	0	2.45821e+06	0	0	0	0	0	0
P	3777	195.152	10.7716	C9H23O2P	194.144					0	0	0	0	0	0	0	0	0	0	0	0	0	0	0	0	0	0	0	0	0	0	0	0	0	0	2.24879e+06	0	0	0	2.27478e+06	0	0	0	0	2.30907e+06	0	0	0	0
P	4078	195.155	10.7661		194.148					0	0	0	0	0	0	0	0	0	0	0	0	0	0	0	0	0	0	0	0	0	0	0	0	0	0	0	1.86904e+06	0	1.92133e+06	0	0	0	0	1.95625e+06	0	0	0	0	0
P	3456	195.158	10.4749		194.15					0	6887.55	5357.33	6837.63	32113.5	0	0	0	0	0	0	0	0	0	0	3659.46	11945.1	0	0	0	0	0	0	9714.89	0	1.72227e+06	0	0	0	0	0	1.57234e+06	1.73372e+06	0	0	0	1.67285e+06	0	0	0
P	4342	195.159	10.4585	C9H22O4	194.152					0	0	0	0	32113.5	3087.6	0	0	0	0	0	0	5452.87	2503.76	0	0	0	5485.2	0	0	0	0	0	0	0	0	0	0	1.53562e+06	0	0	1.60428e+06	20935.6	1.53803e+06	0	0	1.57748e+06	0	0	23310.7
P	3782	195.161	10.7716	C10H18N4	194.153	0.763214				0	0	0	0	0	0	0	0	0	0	0	0	0	0	0	0	0	0	0	0	0	0	0	0	0	0	1.42107e+06	0	0	0	1.47275e+06	0	0	0	0	1.43749e+06	0	0	0	0
P	4084	195.164	10.7661	C7H22N4S	194.157					0	0	0	0	0	0	0	0	0	0	0	0	0	0	0	0	0	0	0	0	0	0	0	0	0	0	0	1.16697e+06	0	1.21063e+06	0	0	0	0	1.17497e+06	0	0	0	0	0
P	3463	195.167	10.4115	C4H18N8O	194.159					0	6266.92	1405.77	3130.13	25451.2	0	0	0	0	0	0	0	0	0	0	0	4218.84	0	0	0	0	0	0	4191.58	0	1.07747e+06	0	0	0	0	0	1.0032e+06	1.04089e+06	0	0	0	1.01784e+06	0	0	0
P	4344	195.168	10.4446	C4H18N8O	194.161					0	0	0	0	25451.2	6815.29	0	0	0	0	0	0	2021.12	5499.98	0	0	0	4497.12	0	0	0	0	0	0	0	0	0	0	970830	0	0	1.01984e+06	6037.73	926918	0	0	126369	0	0	29952.9
P	3793	195.169	10.7716	C8H22N2O3	194.162					0	0	0	0	0	0	0	0	0	0	0	0	0	0	0	0	0	0	0	0	0	0	0	0	0	0	892015	0	0	0	918134	0	0	0	0	882263	0	0	0	0
P	4094	195.173	10.7661	C7H23N4P	194.166					0	0	0	0	0	0	0	0	0	0	0	0	0	0	0	0	0	0	0	0	0	0	0	0	0	0	0	718280	0	746302	0	0	0	0	714148	0	0	0	0	0
P	3477	195.175	10.8782	C13H22O	194.168					0	1723.23	881.38	2056.52	0	0	0	0	0	0	0	0	0	0	0	3291.16	5495.8	0	0	0	0	0	0	4909.85	0	629721	0	0	0	0	0	3245.92	578204	0	0	0	590170	0	0	0
P	4576	195.176	10.5733		194.169					0	1723.23	881.38	0	24908.6	0	0	0	0	0	0	0	2128.98	0	0	0	5495.8	0	0	0	0	0	0	4909.85	0	636876	0	0	0	0	0	586117	572532	0	0	0	596302	0	0	25904.4
P	4350	195.177	10.7661		194.17					0	0	0	0	0	0	0	0	0	0	0	0	0	0	0	0	0	0	0	0	0	0	0	0	0	0	0	0	540084	0	500624	0	0	508225	0	0	0	0	0	0
P	3804	195.179	10.7772	C3H18N10	194.171					0	0	0	0	0	0	0	0	0	0	0	0	0	0	0	0	0	0	0	0	0	0	0	0	0	0	476081	0	0	0	0	0	0	0	0	472196	0	0	0	0
P	4121	195.182	10.7661	C7H22N4O2	194.174					0	0	0	0	0	0	0	0	0	0	0	0	0	0	0	0	0	0	0	0	0	0	0	0	0	0	0	345547	0	366185	0	0	0	0	344345	0	0	0	0	0
P	3515	195.184	10.5674		194.177					0	1259.41	2312.38	3822.29	25674.1	0	0	0	0	0	0	0	0	0	0	2250.93	2756.3	0	0	0	0	0	0	3143.65	0	284241	0	0	0	0	0	222698	255179	0	0	0	268990	0	0	0
P	4603	195.185	10.6304	C12H22N2	194.178		α-Amino-3-carboxybenzeneacetic acid; (R)-form	C9H9NO4	Isol. from Iris tingitana	0	1259.41	2312.38	0	25674.1	0	0	0	0	0	0	0	2905.84	0	0	0	2756.3	0	0	0	0	0	0	3143.65	0	421.421	0	0	19039.9	0	0	242269	260525	0	0	0	261971	0	0	19444
P	4377	195.186	10.7661	C12H22N2	194.179		α-Amino-3-carboxybenzeneacetic acid; (±)-form	C9H9NO4	Isol. from Reseda luteola	0	0	0	0	0	0	0	0	0	0	0	0	0	0	0	0	0	0	0	0	0	0	0	0	0	0	0	0	238359	0	210278	0	0	212830	0	0	0	0	0	0
P	3882	195.188	10.7772		194.18		2,6-Benzoxazolediol; NH-form, 6-Me ether, N-methoxy	C9H9NO4	Isol. from Scoparia dulcis	0	0	0	0	0	0	0	0	0	0	0	0	0	0	0	0	0	0	0	0	0	0	0	0	0	0	198702	0	0	0	0	0	0	0	0	193053	0	0	0	0
P	4213	195.191	10.7661		194.183		2-[(Carboxymethyl)amino]benzoic acid	C9H9NO4	Prod. by a co-culture of Bacillus subtilis 168 and Fusarium tricinctum	0	0	0	0	0	0	0	0	0	0	0	0	0	0	0	0	0	0	0	0	0	0	0	0	0	0	0	139043	0	140768	0	0	0	0	130230	0	0	0	0	0
P	3633	195.193	10.5856	C6H22N6O	194.186		2,3-Dihydro-5,6-dihydroxy-1H-indole-2-carboxylic acid	C9H9NO4		0	921.43	1342.85	3466.5	24148.6	0	0	0	0	0	0	0	0	0	0	1229.14	2889.64	0	0	0	0	0	0	1855.33	0	113939	0	0	0	0	0	81597.5	98173.4	0	0	0	111413	0	0	0
P	4650	195.194	10.7641		194.187		2,3-Dihydro-5,6-dihydroxy-1H-indole-2-carboxylic acid; (ξ)-form	C9H9NO4		0	921.43	1342.85	0	24148.6	0	0	0	0	0	0	0	1340.45	0	0	0	2889.64	0	0	0	0	0	0	1855.33	0	0	0	0	22827.5	0	0	91670.2	105665	0	0	0	105269	0	0	11059.4
P	4440	195.195	10.7661		194.188		2,7-Dihydroxy-2H-1,4-benzoxazin-3(4H)-one; (R)-form, 7-Me ether	C9H9NO4	Constit. of Coix lachryma-jobi, Zea mays, Agropyron repens and Hordeum vulgare	0	0	0	0	0	0	0	0	0	0	0	0	0	0	0	0	0	0	0	0	0	0	0	0	0	0	0	0	91442.3	0	80530	0	0	80692.9	0	0	0	0	0	0
P	4012	195.196	10.7772		194.189		3-(1,2-Dihydroxy-4-isocyano-3-cyclopenten-1-yl)-2-propenoic acid; (1R*,2S*,1'E)-form	C9H9NO4		0	0	0	0	0	0	0	0	0	0	0	0	0	0	0	0	0	0	0	0	0	0	0	0	0	0	80128.4	0	0	0	0	0	0	0	0	79325.3	0	0	0	0
P	2803	196.061	7.91902	C2H9N7O2S	195.054	2.23937	Dioxolide A; 3a,4-Didehydro	C9H9NO4	Prod. by Streptomyces tendae TÃ¼ 4042	0	0	0	0	0	0	0	0	0	0	0	0	0	0	99289.1	0	0	0	0	70659.4	0	0	0	0	0	0	88130	0	0	0	0	0	0	0	0	0	0	0	0	0
P	2128	196.062	7.9343	C10H5N5	195.055		(2-Oxoethyl)phosphonic acid; Di-Et ester, oxime	C6H14NO4P		0	0	0	0	0	0	0	83524.1	0	72406	0	0	0	0	0	0	0	0	0	0	83471.1	0	0	0	0	0	0	0	0	0	0	0	0	0	0	0	0	90750.8	0	0
P	2449	196.063	7.91646	C8H10N3OP	195.056	-1.726	Asterubin	C5H13N3O3S	Isol. from an Asterias sp., Didemnum ligulum and a Phoriospongia sp.	0	0	0	0	0	0	0	0	91227	0	0	0	0	0	0	0	0	0	0	0	0	139860	110087	0	0	0	0	149947	0	124240	0	0	0	0	119890	0	0	0	0	0
P	2924	196.064	7.92846	C6H15NO2P2	195.057					0	0	0	0	0	0	0	0	0	0	0	0	0	0	0	138657	0	0	0	0	0	0	0	261265	151627	0	0	0	0	0	0	0	0	0	0	0	0	0	0	0
P	276	196.066	7.92257	C7H9N5S	195.059					0	199258	166571	160878	191967	0	0	0	0	0	0	0	0	0	0	0	190815	0	0	0	0	0	0	256740	0	213334	0	0	0	0	0	0	0	0	0	0	211616	0	0	0
P	1028	196.068	7.92098	C3H9N5O5	195.06					0	0	0	0	0	235305	0	0	0	0	0	0	205412	243721	0	0	0	245782	0	0	0	0	0	0	0	0	0	0	269693	0	0	263497	235001	0	0	0	0	0	0	209521
P	1472	196.069	7.9208	C4H5N9O	195.062					0	0	0	0	0	0	284772	0	0	0	0	252707	0	0	401257	0	0	0	302088	0	0	0	0	0	0	0	0	0	0	0	317273	0	0	294322	0	311766	0	0	256662	0
P	1871	196.07	7.92795	C2H10N7O2P	195.063					0	0	0	0	0	0	0	361872	0	326571	290997	0	0	0	0	0	0	0	0	326423	355225	0	0	0	0	0	382984	0	0	0	0	0	0	0	0	0	0	351632	0	0
P	2293	196.072	7.92108	CH9N9OS	195.065		Gluconic acid; D-form, Amide	C6H13NO6		0	0	0	0	0	0	0	0	376287	0	0	0	0	0	0	0	0	0	0	0	0	512244	427470	0	0	0	0	542545	0	448772	0	0	0	0	475584	0	0	0	0	0
P	2886	196.073	7.92846	C6H14NO4P	195.066	0.252669	Mannose; D-form, Oxime	C6H13NO6		0	0	0	0	0	0	0	0	0	0	0	0	0	0	0	478445	0	0	0	0	0	0	0	736384	518207	0	0	0	0	0	0	0	0	0	0	0	0	0	0	0
P	161	196.075	7.92257	C7H10N5P	195.067	-1.67853	2-Amino-6,8-dihydroxypurine; 7,O6-Di-Me	C7H9N5O2	Isol. from the ascidian Symplegma rubra	0	647694	588319	552520	557388	0	0	0	0	0	0	0	0	0	0	0	603855	0	0	0	0	0	0	650342	0	680816	0	0	0	0	0	0	0	0	0	0	558193	0	0	0
P	948	196.077	7.92461	C5H15N3OP2	195.069		6-Amino-2,8-dihydroxypurine; (1H,3H)-form, 1,3-Di-Me	C7H9N5O2	Isol. from an Amphimedon sp., Pseudodistoma cereum, Phestilla melanobranchia and a Tubastrea sp.	0	0	0	0	0	685340	0	0	0	0	0	0	613198	722342	0	0	0	626460	0	0	0	0	0	0	0	0	0	0	659212	0	0	657379	0	0	0	0	0	0	0	599718
P	1400	196.078	7.92213	C4H14N5PS	195.071		2,7-Dihydro-2,5,7-trimethyl-5H-imidazo[4,5-e]-1,2,4-triazine-3,6-dione	C7H9N5O2	Prod. by Streptomyces sp. IM 2096	0	0	0	0	0	0	662654	0	0	0	0	724900	0	0	778541	0	0	0	784297	0	0	0	0	0	0	0	0	0	0	0	1.09687e+06	0	0	0	0	0	0	0	700204	0
P	1826	196.079	7.92655	C10H13NOS	195.072		2,3-Pyridinedicarboxylic acid; Dihydrazide	C7H9N5O2		0	0	0	0	0	0	0	729869	0	682728	662808	0	0	0	0	0	0	0	0	714806	717082	0	0	0	0	0	788064	0	0	0	0	0	0	0	0	0	0	705521	0	0
P	6566	196.08	7.94164	C3H5N11	195.073		3,5-Pyridinedicarboxylic acid; Dihydrazide	C7H9N5O2		0	0	0	0	0	0	0	0	0	0	0	0	0	0	0	0	0	0	0	0	0	0	0	0	0	0	0	0	0	0	0	0	0	0	0	0	0	0	0	0
P	2260	196.081	7.92891	C6H13NO6	195.074	-0.468005				0	0	0	0	0	0	0	0	723404	0	0	0	0	0	0	0	0	0	0	0	0	0	0	0	824723	0	0	921370	0	0	0	0	0	0	0	0	0	0	0	0
P	2876	196.082	7.93216	C7H17NOS2	195.075	-2.50611	2-(1H-Imidazol-4-yl)quinoline	C12H9N3	Alkaloid from the aerial parts of Macrorungia longistrobus (preferred genus name Anisotes) (Acanthaceae)	0	0	0	0	0	0	0	0	0	0	0	0	0	0	0	803417	0	0	0	0	0	0	0	1.18078e+06	0	0	0	0	0	0	0	0	0	0	0	0	0	0	0	0
							2-Phenazinamine	C12H9N3
P	141	196.084	7.92049	H9N11S	195.076					0	815309	940959	909833	824013	0	0	0	0	0	0	0	0	0	0	0	932178	0	0	0	0	0	0	848392	0	953330	0	0	0	0	0	0	0	0	0	0	775254	0	0	0
P	928	196.085	7.96921	C5H14N3O3P	195.078					0	0	0	0	7101.75	922978	0	0	0	0	0	0	773458	836395	0	0	0	873142	0	0	0	0	0	0	0	0	0	0	851000	0	0	866809	839921	134556	0	0	124882	0	0	781580
P	1390	196.087	7.9217	C12H9N3	195.08	-0.393051	2-Amino-3-hydroxybenzoic acid; O,N-Di-Me, Me ester	C10H13NO3	Alkaloid from seeds of Nigella damascena (Ranunculaceae)	0	0	0	0	0	0	934572	0	0	0	0	0	0	0	1.03019e+06	0	0	0	1.21772e+06	0	0	0	0	0	0	0	0	0	1.19161e+06	0	0	0	0	0	0	0	0	0	765212	0
P	1822	196.088	7.92743	C10H14NOP	195.081		2-Amino-4-hydroxybutanoic acid; (R)-form, Ph ether	C10H13NO3		0	0	0	0	0	0	0	811648	0	0	795087	0	0	0	0	0	0	0	0	0	0	0	0	0	0	0	896493	0	0	0	0	0	0	0	0	0	0	777593	0	0
P	2256	196.09	7.9246	CH9N9O3	195.083		2-Amino-3-(3-hydroxymethylphenyl)propanoic acid; (S)-form	C10H13NO3	Found in Caesalpinia tinctoria and Iris spp.	0	0	0	0	0	0	0	0	953005	0	0	0	0	0	0	0	0	0	0	0	0	1.17393e+06	0	0	0	0	0	0	0	0	0	0	0	0	0	0	0	0	0	0
P	2879	196.091	7.92032	C9H13N3S	195.083		2-Amino-3-(3-hydroxymethylphenyl)propanoic acid; (±)-form	C10H13NO3		0	0	0	0	0	0	0	0	0	0	0	0	0	0	0	800769	0	0	0	0	0	0	0	0	955324	0	0	1.08239e+06	0	1.1196e+06	0	0	0	0	0	0	0	0	0	0
P	152	196.093	7.92049	C5H13N3O5	195.085		2-Amino-3-(4-hydroxymethylphenyl)propanoic acid; (S)-form	C10H13NO3	Found in Escherichia coli	0	762121	803594	719914	721164	0	0	0	0	0	0	0	0	0	0	0	794394	0	0	0	0	0	0	687866	0	752110	0	0	0	0	0	0	0	0	0	0	697127	0	0	0
P	939	196.094	7.92467	C6H9N7O	195.087		3-Amino-2-hydroxy-4-phenylbutanoic acid	C10H13NO3		0	0	0	0	0	748439	0	0	0	0	0	0	714260	716045	0	0	0	720180	0	0	0	0	0	0	0	0	0	0	700137	0	0	0	1.05169e+06	0	0	0	0	0	0	695659
P	1401	196.096	7.92074	C4H14N5O2P	195.089		3-Amino-2-hydroxy-4-phenylbutanoic acid; (2S,3S)-form	C10H13NO3	Aminoacid residue in the kynostatins	0	0	0	0	0	0	726899	0	0	0	0	668865	0	0	589496	0	0	0	759798	0	0	0	0	0	0	0	0	0	0	0	1.07022e+06	1.06031e+06	0	943220	0	0	0	0	608588	0
P	1837	196.097	7.92795	C3H13N7OS	195.09	2.13964	2-Amino-1-propanol; (S)-form, N-(2-Hydroxybenzoyl)	C10H13NO3	Prod. by Streptomyces hygroscopicus	0	0	0	0	0	0	0	587124	0	595350	602675	0	0	0	0	0	0	0	0	642992	588198	0	0	0	0	0	669789	0	0	0	0	0	0	0	0	0	0	569999	0	0
P	2272	196.099	7.92108	C9H14N3P	195.092		Tardin	C11H15O3	Isol. from Penicillium tardum	0	0	0	0	0	0	0	0	583235	0	0	0	0	0	0	0	0	0	0	0	0	565131	565191	0	0	0	0	574829	0	612307	0	0	0	0	599291	0	0	0	0	0
P	2885	196.1	7.93263	C7H17NO3S	195.093					0	0	0	0	0	0	0	0	0	0	0	0	0	0	0	516686	0	0	0	0	0	0	0	457102	544838	0	0	0	0	0	0	0	0	0	0	0	0	0	0	0
P	179	196.101	7.92257	C7H19NOP2	195.094					0	430445	530378	475241	464572	0	0	0	0	0	0	0	0	0	0	0	492785	0	0	0	0	0	0	433509	0	491787	0	0	0	0	0	0	0	0	0	0	504543	0	0	0
P	965	196.103	7.92283	C6H18N3PS	195.096		2-Methylaniline; N-Benzylidene	C14H13N		0	0	0	0	0	424298	0	0	0	0	0	0	416004	445067	0	0	0	434613	0	0	0	0	0	0	0	0	0	0	452606	0	0	444498	454627	0	0	0	0	0	0	432585
P	1433	196.105	7.92288	C4H13N5O4	195.097					0	0	0	0	0	0	406393	0	0	0	0	407927	0	0	353650	0	0	0	415967	0	0	0	0	0	0	0	0	0	0	0	445836	0	0	405731	0	460144	0	0	386839	0
P	1874	196.106	7.92795	C5H9N9	195.099					0	0	0	0	0	0	0	356525	0	353172	366569	0	0	0	0	0	0	0	0	398056	360287	0	0	0	0	0	402339	0	0	0	0	0	0	0	0	0	0	356328	0	0
P	2305	196.108	7.92108	C9H13N3O2	195.101	-0.583154				0	0	0	0	0	0	0	0	338472	0	0	0	0	0	0	0	0	0	0	0	0	325298	345845	0	0	0	0	341586	0	347736	0	0	0	0	353821	0	0	0	0	0
P	2890	196.109	7.92846	C2H13N9S	195.102	-1.73355				0	0	0	0	0	0	0	0	0	0	0	0	0	0	0	314013	0	0	0	0	0	0	0	252395	303026	0	0	0	0	0	0	0	0	0	0	0	0	0	0	0
P	239	196.11	7.92049	C7H18NO3P	195.103					0	255330	317724	287673	280932	0	0	0	0	0	0	0	0	0	0	0	283388	0	0	0	0	0	0	259983	0	297675	0	0	0	0	0	0	0	0	0	0	287635	0	0	0
P	1014	196.112	7.92283	C14H13N	195.105	0.170505				0	0	0	0	0	250917	0	0	0	0	0	0	246348	258661	0	0	0	260909	0	0	0	0	0	0	0	0	0	0	278605	0	0	264135	266402	0	0	0	0	0	0	253484
P	1491	196.114	7.92288	C6H19N3P2	195.106					0	0	0	0	0	0	233798	0	0	0	0	239751	0	0	200043	0	0	0	240409	0	0	0	0	0	0	0	0	0	0	0	256450	0	0	236989	0	247506	0	0	224422	0
P	1930	196.115	7.92795	C3H13N7O3	195.108					0	0	0	0	0	0	0	202171	0	205181	208616	0	0	0	0	0	0	0	0	229249	207390	0	0	0	0	0	243914	0	0	0	0	0	0	0	0	0	0	201321	0	0
P	2347	196.117	7.92108		195.11					0	0	0	0	0	0	0	0	189517	0	0	0	0	0	0	0	0	0	0	0	0	175804	190471	0	0	0	0	197936	0	189099	0	0	0	0	202713	0	0	0	0	0
P	2913	196.118	7.92846	C7H17NO5	195.111					0	0	0	0	0	0	0	0	0	0	0	0	0	0	0	167752	0	0	0	0	0	0	0	122881	161658	0	0	0	0	0	0	0	0	0	0	0	0	0	0	0
P	364	196.119	7.92049	C8H13N5O	195.112					0	130468	169941	153409	145605	0	0	0	0	0	0	0	0	0	0	0	147304	0	0	0	0	0	0	127023	0	165931	0	0	0	0	0	0	0	0	0	0	138179	0	0	0
P	1135	196.121	7.92283	C6H18N3O2P	195.114					0	0	0	0	0	129491	0	0	0	0	0	0	127448	132854	0	0	0	125874	0	0	0	0	0	0	0	0	0	0	137223	0	0	127158	135836	0	0	0	0	0	0	129808
P	1628	196.122	7.92288	C5H17N5OS	195.115					0	0	0	0	0	0	116156	0	0	0	0	117303	0	0	90286.7	0	0	0	113317	0	0	0	0	0	0	0	0	0	0	0	121212	0	0	118535	0	115877	0	0	107292	0
P	2092	196.124	7.92643	C11H18NP	195.117					0	0	0	0	0	0	0	95177.1	0	94142.4	99461.3	0	0	0	0	0	0	0	0	107820	93039.3	0	0	0	0	0	117809	0	0	0	0	0	0	0	0	0	0	92436.6	0	0
P	2459	196.126	7.91972	C2H13N9O2	195.119					0	0	0	0	0	0	0	0	86409.3	0	0	0	0	0	0	0	0	0	0	0	0	71425.7	82681	0	65130.9	0	0	83091.3	0	82329.7	0	0	0	0	81668.3	0	0	0	0	0
P	661	196.127	7.91647	C2H13N9O2	195.12					0	0	74483.8	66705.8	0	0	0	0	0	0	0	0	0	0	0	70745.4	0	0	0	0	0	0	0	0	0	0	0	0	0	0	0	0	0	0	0	0	0	0	0	0
P	3735	196.128	10.5899	C8H22NPS	195.121					0	4072.07	2318.97	1858.85	65309.4	0	0	0	0	0	0	0	0	0	0	0	3582.23	0	0	0	0	0	0	2271.56	0	81169	0	0	0	0	0	97213.2	80916.9	0	0	0	70207.5	0	0	0
P	4657	196.129	10.5264	C6H17N3O4	195.122					0	4072.07	0	0	65309.4	0	0	0	0	0	0	0	4994.17	0	0	0	3582.23	2896.24	0	0	0	0	0	1864.92	0	0	0	0	106878	0	0	89746.5	87705.4	1370.93	0	0	75662.5	0	0	3737.49
P	4434	196.13	10.7661	C7H13N7	195.123					0	0	0	0	0	0	0	0	0	0	0	0	0	0	0	0	0	0	0	0	0	0	0	0	0	0	0	0	100355	0	119158	0	0	100673	0	0	0	0	0	0
P	3936	196.131	10.7772	C5H18N5OP	195.124					0	0	0	0	0	0	0	0	0	0	0	0	0	0	0	0	0	0	0	0	0	0	0	0	0	0	131029	0	0	0	0	0	0	0	0	113160	0	0	0	0
P	4193	196.135	10.7661	C4H17N7S	195.127					0	0	0	0	0	0	0	0	0	0	0	0	0	0	0	0	0	0	0	0	0	0	0	0	0	0	0	175833	0	175633	0	0	0	0	165433	0	0	0	0	0
P	3548	196.137	10.5416	CH13N11O	195.13					0	1469.78	1444.55	1003.15	31511.7	0	0	0	0	0	0	0	0	0	0	0	4116.96	0	0	0	0	0	0	1714.62	0	222426	0	0	0	0	0	247289	222804	0	0	0	207893	0	0	0
P	4605	196.138	10.5957	C8H23NP2	195.131					0	1469.78	0	0	31511.7	0	0	0	0	0	0	0	2780.72	0	0	0	4116.96	2560.09	0	0	0	0	0	4521.98	0	0	0	0	247372	0	0	242925	229458	3172.69	0	0	214154	0	0	4781.19
P	4380	196.139	10.7661		195.132					0	0	0	0	0	0	0	0	0	0	0	0	0	0	0	0	0	0	0	0	0	0	0	0	0	0	0	0	241058	0	276241	0	0	246297	0	0	0	0	0	0
P	3843	196.14	10.7772	C5H17N5O3	195.133					0	0	0	0	0	0	0	0	0	0	0	0	0	0	0	0	0	0	0	0	0	0	0	0	0	0	283327	0	0	0	0	0	0	0	0	258352	0	0	0	0
P	4136	196.143	10.7661	C4H18N7P	195.136					0	0	0	0	0	0	0	0	0	0	0	0	0	0	0	0	0	0	0	0	0	0	0	0	0	0	0	301555	0	311518	0	0	0	0	295967	0	0	0	0	0
P	3508	196.146	10.5999	C8H22NO2P	195.139					0	1586.82	1494.08	1401.06	16168.4	0	0	0	0	0	0	0	0	0	0	0	3973.27	0	0	0	0	0	0	2648.06	0	330080	0	0	0	0	0	339800	314627	0	0	0	308746	0	0	0
P	4589	196.147	10.4596	C8H22NO2P	195.14					0	1586.82	0	0	16168.4	0	0	0	0	0	0	0	2832.1	0	0	0	3973.27	1454.01	0	0	0	0	0	4146.59	0	0	0	0	328877	0	0	335180	320130	0	0	0	314776	0	0	5233.83
P	4364	196.148	10.7661	C7H21N3OS	195.141					0	0	0	0	0	0	0	0	0	0	0	0	0	0	0	0	0	0	0	0	0	0	0	0	0	0	0	0	325462	0	339403	0	0	318700	0	0	0	0	0	0
P	3835	196.149	10.7772	H13N13	195.142					0	0	0	0	0	0	0	0	0	0	0	0	0	0	0	0	0	0	0	0	0	0	0	0	0	0	328009	0	0	0	0	0	0	0	0	313789	0	0	0	0
P	4139	196.152	10.7661	C4H17N7O2	195.145					0	0	0	0	0	0	0	0	0	0	0	0	0	0	0	0	0	0	0	0	0	0	0	0	0	0	0	298404	0	309587	0	0	0	0	297223	0	0	0	0	0
P	3521	196.155	10.5849	C9H17N5	195.148					0	2514.57	1704.07	1248.94	10509.3	0	0	0	0	0	0	0	0	0	0	0	3416.13	0	0	0	0	0	0	1870.48	0	288645	0	0	0	0	0	279670	266128	0	0	0	270549	0	0	0
P	4597	196.156	10.6123	C9H17N5	195.149					0	2514.57	0	0	10509.3	0	0	0	0	0	0	0	3479.42	0	0	0	3416.13	2010.08	0	0	0	0	0	1278.11	0	0	0	0	268013	0	0	275579	271663	2203.62	0	0	276296	0	0	5660.19
P	4372	196.157	10.7661	C7H22N3OP	195.15					0	0	0	0	0	0	0	0	0	0	0	0	0	0	0	0	0	0	0	0	0	0	0	0	0	0	0	0	263175	0	250086	0	0	250396	0	0	0	0	0	0
P	3855	196.158	10.7772	C7H22N3OP	195.151					0	0	0	0	0	0	0	0	0	0	0	0	0	0	0	0	0	0	0	0	0	0	0	0	0	0	244756	0	0	0	0	0	0	0	0	241029	0	0	0	0
P	4173	196.161	10.7661		195.154					0	0	0	0	0	0	0	0	0	0	0	0	0	0	0	0	0	0	0	0	0	0	0	0	0	0	0	204229	0	202785	0	0	0	0	204407	0	0	0	0	0
P	3565	196.164	10.5366		195.157					0	1389.05	2159.47	1656.03	10198.6	0	0	0	0	0	0	0	0	0	0	0	1683.74	0	0	0	0	0	0	2769.98	0	188874	0	0	0	0	0	178804	165967	0	0	0	172977	0	0	0
P	4620	196.165	10.6419	C7H21N3O3	195.158					0	1389.05	0	0	10198.6	0	0	0	0	0	0	0	1330.18	0	0	0	1683.74	1258.73	0	0	0	0	0	722.222	0	0	0	0	167563	0	0	173612	172346	3309.31	0	0	178870	0	0	3867.52
P	4396	196.166	10.7661	C7H21N3O3	195.159					0	0	0	0	0	0	0	0	0	0	0	0	0	0	0	0	0	0	0	0	0	0	0	0	0	0	0	0	161474	0	154300	0	0	156486	0	0	0	0	0	0
P	3918	196.167	10.7772		195.16					0	0	0	0	0	0	0	0	0	0	0	0	0	0	0	0	0	0	0	0	0	0	0	0	0	0	150883	0	0	0	0	0	0	0	0	149374	0	0	0	0
P	4236	196.17	10.7661	C12H21NO	195.163					0	0	0	0	0	0	0	0	0	0	0	0	0	0	0	0	0	0	0	0	0	0	0	0	0	0	0	120386	0	125532	0	0	0	0	124218	0	0	0	0	0
P	3635	196.173	10.4548		195.166					0	2278.56	2337.17	1475.91	8343.19	0	0	0	0	0	0	0	0	0	0	0	2395	0	0	0	0	0	0	1287.73	0	115036	0	0	0	0	0	107435	99549.1	0	0	0	102456	0	0	0
P	4647	196.174	10.5816	C2H17N11	195.166					0	2278.56	0	0	8343.19	0	0	0	0	0	0	0	1999.51	0	0	0	2395	2329.49	0	0	0	0	0	869.924	0	0	0	0	103100	0	0	99921.4	103888	2079.91	0	0	109130	0	0	5826.42
P	4433	196.175	10.7661	C2H17N11	195.168					0	0	0	0	0	0	0	0	0	0	0	0	0	0	0	0	0	0	0	0	0	0	0	0	0	0	0	0	98494	0	89777.3	0	0	91859.6	0	0	0	0	0	0
P	4009	196.176	10.7772	C6H21N5O2	195.169		4-Acetyl-3-hydroxy-6-isopropyl-2H-pyran-2-one	C10H12O4	Constit. of Zizyphus jujuba	0	0	0	0	0	0	0	0	0	0	0	0	0	0	0	0	0	0	0	0	0	0	0	0	0	0	83839.3	0	0	0	0	0	0	0	0	86368.1	0	0	0	0
P	4515	196.179	10.7689		195.172		Batatic acid; (S)-form	C10H12O4	Obt. from sweet potato infected with Ceratostomella fimbriata	0	0	0	0	0	0	0	0	0	0	0	0	0	0	0	0	0	0	0	0	0	0	0	0	0	0	0	0	0	68898.9	0	0	0	0	68275.2	0	0	0	0	0
P	6046	197.076	4.11546	C2H4N12	196.068		Batatic acid; (±)-form	C10H12O4		0	34746.9	0	0	5098.81	34865.1	0	0	0	0	0	0	38076.4	51680.5	0	0	0	44986.3	0	0	0	0	0	0	0	51185.4	0	0	0	0	0	0	0	0	0	0	48008.8	0	0	62115.9
P	6014	197.076	12.695	C7H17O2PS	196.068		1,4-Benzoquinone; Bis(ethylene acetal)	C10H12O4		0	0	0	0	0	0	0	0	0	0	0	0	0	0	0	0	0	0	0	0	0	0	0	0	0	0	0	0	0	0	0	0	0	0	0	0	0	0	0	81203.9
P	5606	197.078	12.6959	C6H16N2OS2	196.07		Cantharidin	C10H12O4	Occurs in the defence substances of Epicauta spp., Lytta vesicatoria and many other Coleoptera	0	0	0	0	0	0	0	0	0	0	0	0	0	0	0	0	0	0	0	0	0	0	0	0	0	0	0	0	0	0	0	0	0	0	0	0	0	0	92278.7	0
P	5623	197.078	2.36288	C6H8N6O2	196.071		Cillifuranone	C10H12O4	Prod. by Penicillium chrysogenum SF066	0	0	0	0	0	0	0	0	0	0	0	0	0	0	0	0	0	0	0	0	0	0	0	0	0	0	0	0	0	0	0	0	0	0	0	0	0	0	82492.9	0
P	5193	197.079	12.6922	C4H13N4O3P	196.072		Clivonecic acid	C10H12O4	Obt. from Clivorine by alkaline hydrol.	0	0	0	0	0	0	0	0	0	0	0	0	0	0	0	0	0	0	0	0	0	0	0	0	0	0	0	0	0	0	0	0	0	0	0	0	0	117040	0	0
P	3402	197.08	2.35903	C4H13N4O3P	196.072		Curvulide B1	C10H12O4	Prod. by the marine-derived Curvularia sp. (strain No. 768)	0	0	0	0	0	0	0	0	0	0	0	0	0	0	0	0	0	0	0	0	0	0	66054.1	0	0	0	0	0	0	0	0	59921.1	0	0	0	0	0	79799.9	0	0
P	4312	197.08	12.6719	C10H12O4	196.073	-2.34301	Decarestrictine A1; 3-Ketone	C10H12O4	Prod. by Penicillium simplicissimum FH-A 6090	0	0	0	0	0	0	0	0	0	0	0	0	0	0	0	0	0	0	0	0	0	0	0	0	0	0	0	80701.9	0	80525.8	0	0	0	0	88093.1	0	0	0	0	0
P	3012	197.082	2.34995	C3H12N6O2S	196.074					0	0	0	0	0	0	0	0	0	0	0	0	0	0	0	94995.1	0	0	0	0	0	85639.1	0	65114	61187.1	0	0	0	0	75056.1	0	0	0	0	69432.1	0	0	0	0	0
P	6233	197.082	12.6953	C3H12N6O2S	196.074					0	0	0	0	0	0	0	0	0	0	0	0	0	0	0	0	0	0	0	0	0	0	0	0	0	0	0	0	0	0	0	0	0	0	0	0	0	0	0	0
P	677	197.083	7.92457	C3H14N6P2	196.075					0	0	82856	98330.9	0	0	0	0	0	0	0	0	0	0	0	0	0	0	0	0	0	0	0	78713.2	0	0	0	0	0	0	0	0	0	0	0	0	0	0	0	0
P	3679	197.083	12.4308	C3H14N6P2	196.076					0	2325.46	11089.7	8501.72	5903.08	0	0	0	0	0	0	0	0	0	0	7181.65	2844.1	0	0	0	0	0	0	4398.12	0	95395.9	0	0	0	0	0	105412	96097.8	0	0	0	86078.7	0	0	0
P	3092	197.084	2.34942	C9H13N2OP	196.076					0	58169.3	60004.2	0	0	0	0	0	0	0	0	0	0	0	0	0	113550	0	0	0	0	0	0	0	0	71699	0	70606.7	0	0	0	0	0	0	0	0	74343.1	0	0	0
P	860	197.084	7.92109	C9H13N2OP	196.077					0	74743.1	77438.7	0	82036.2	0	0	0	0	0	0	0	0	0	0	0	108175	0	0	0	0	0	0	0	0	77058.7	0	0	0	0	0	0	72142.3	0	0	0	73130.1	0	0	69779.3
P	2693	197.085	4.06543	C7H16O4S	196.077					0	58169.3	0	0	4815.95	64963.7	0	0	0	0	0	0	52902.1	100000	0	0	0	112731	0	0	0	0	0	0	0	72032.7	0	0	0	0	0	0	0	0	0	0	68385.9	0	0	87095.6
P	4437	197.085	12.6744	C7H16O4S	196.077					0	0	0	0	0	0	0	0	0	0	0	0	0	0	0	0	0	0	0	0	0	0	0	0	0	0	0	0	98409.1	0	0	0	0	114132	0	0	0	0	0	154474
P	1324	197.085	7.92204	H8N10O3	196.078					0	0	0	0	0	104212	0	0	0	0	0	0	0	102532	0	0	0	114320	0	0	0	0	0	0	0	0	0	0	77550.7	0	0	79865.2	105347	0	0	0	0	0	0	0
P	3950	197.086	12.6662	C8H12N4S	196.079					0	0	0	0	0	0	0	0	0	0	0	0	0	0	0	0	0	0	0	0	0	0	0	0	0	0	117448	0	0	0	105533	0	0	0	0	106818	0	0	165670	0
P	1750	197.086	7.92011	C6H17N2OPS	196.079					0	0	0	0	0	0	99940.1	0	0	0	0	76707.4	0	0	79767.8	0	0	0	111410	0	0	0	0	0	0	0	0	0	0	0	81431.3	0	0	110948	0	77451.4	0	0	0	0
P	2832	197.087	2.35602	C6H17N2OPS	196.08					0	0	0	0	0	0	0	0	0	0	0	0	0	0	100965	0	0	0	130062	134949	0	0	0	0	0	0	0	0	75043.5	0	94146	0	103767	104321	0	90194.7	0	0	92751.7	0
P	2165	197.088	7.92887	C4H12N4O5	196.081					0	0	0	0	0	0	0	90537.6	0	104141	96310.4	0	0	0	0	0	0	0	0	90311.9	109066	0	0	0	0	0	78954.6	0	0	0	0	0	0	0	0	0	0	69510.7	0	0
P	5094	197.088	12.6922	C4H12N4O5	196.081		2-Amino-4,5-dihydroxybenzoic acid; N-Et, amide	C9H12N2O3	Alkaloid from Piper nigrum	0	0	0	0	0	0	0	0	0	0	0	0	0	0	0	0	0	0	0	0	0	0	0	0	0	0	0	0	0	0	0	0	0	0	0	0	0	170621	0	0
P	3301	197.088	2.35798	C4H12N4O5	196.081		α-Amino-5-hydroxy-2-pyridinepropanoic acid; (S)-form, Me ester	C9H12N2O3		0	0	0	0	0	0	0	0	0	0	0	0	0	0	0	0	0	0	0	0	117973	0	126894	0	0	0	92414.5	0	0	0	0	107282	0	0	0	0	0	87699.6	0	0
P	4249	197.089	12.6719	C5H8N8O	196.082		1,5-Dihydro-5-hydroxy-3-methyl-1-(5-oxo-2-pyrrolidinyl)-2H-pyrrol-2-one	C9H12N2O3	Alkaloid from bulbs of Lilium candidum (Liliaceae)	0	0	0	0	0	0	0	0	0	0	0	0	0	0	0	0	0	0	0	0	0	0	0	0	0	0	0	120608	0	125339	0	0	0	0	121148	0	0	0	0	0
P	6664	197.089	2.35402	C5H8N8O	196.082		2-(4-Hydroxy-3-nitrophenyl)ethylamine; Me ether	C9H12N2O3		0	0	0	0	0	0	0	0	0	0	0	0	0	0	0	0	0	0	0	0	0	0	0	0	0	0	0	0	0	0	0	0	0	0	0	0	0	0	0	0
P	2494	197.09	7.92053	C5H8N8O	196.083					0	0	0	0	0	0	0	0	84137.6	0	0	0	0	0	0	0	0	0	0	0	0	139017	112908	0	144742	0	0	73810.1	0	80697	0	0	0	0	104234	0	0	0	0	0
P	3003	197.091	2.34995	C3H13N6O2P	196.083		2-Amino-4,5-dihydroxybenzoic acid; N-Et, amide	C9H12N2O3	Alkaloid from Piper nigrum	0	0	0	0	0	0	0	0	0	0	0	0	0	0	0	89896.5	0	0	0	0	0	114429	0	101576	109096	0	0	0	0	78691	0	0	0	0	69166.6	0	0	0	0	0
P	6184	197.091	12.6953	C3H13N6O2P	196.083		2-Amino-4-nitrophenol; Propyl ether	C9H12N2O3		0	0	0	0	0	0	0	0	0	0	0	0	0	0	0	0	0	0	0	0	0	0	0	0	0	0	0	0	0	0	0	0	0	0	0	0	0	0	0	0
P	656	197.091	7.9244	C3H13N6O2P	196.084		1,5-Dihydro-5-hydroxy-3-methyl-1-(5-oxo-2-pyrrolidinyl)-2H-pyrrol-2-one	C9H12N2O3	Alkaloid from bulbs of Lilium candidum (Liliaceae)	0	0	87999.3	136067	0	0	0	0	0	0	0	0	0	0	0	117743	0	0	0	0	0	0	0	201795	0	0	0	0	0	0	0	0	0	0	0	0	0	0	0	0
P	3098	197.092	2.35418	C9H12N2O3	196.085	-0.418136				0	0	0	0	0	0	0	0	0	0	0	0	0	0	0	0	98732.7	0	0	0	0	0	0	0	0	0	0	66343.5	0	0	0	0	0	0	0	0	0	0	0	0
P	3637	197.092	12.3899	C9H12N2O3	196.085	0.669891	1-(4-Hydroxyphenyl)-2-phenylethylene; (E)-form	C14H12O	Isol. from trunkwood of Pinus griffithii	0	1865.02	3705.48	6912.21	5366.69	0	0	0	0	0	0	0	0	0	0	6286.69	6980.72	0	0	0	0	0	0	11741.1	0	123945	0	0	0	0	0	129093	128999	0	0	0	96242.6	0	0	0
P	858	197.093	7.86549	C2H12N8OS	196.086					0	73294.2	84591.1	0	127495	0	0	0	0	0	0	0	0	0	0	0	131499	0	0	0	0	0	0	0	0	124872	0	0	0	0	0	0	42378.9	0	0	0	69558.6	0	0	60908.3
P	2714	197.094	4.0771	C7H17O4P	196.086					0	47045.8	0	0	9024	48486.2	0	0	0	0	0	0	46184.4	96265	0	0	0	83675.6	0	0	0	0	0	0	0	74900.5	0	0	0	0	0	0	0	0	0	0	59754.7	0	0	81536.9
P	4424	197.094	12.6744	C7H17O4P	196.086					0	0	0	0	0	0	0	0	0	0	0	0	0	0	0	0	0	0	0	0	0	0	0	0	0	0	0	0	121248	0	0	0	0	124946	0	0	0	0	0	186794
P	2711	197.094	7.84112	C7H17O4P	196.087					0	0	0	0	0	0	0	0	0	0	0	0	0	168165	0	0	0	177320	0	0	0	0	0	0	0	0	0	0	0	0	0	0	169030	0	0	0	0	0	0	0
P	3941	197.095	12.6662	C8H13N4P	196.088					0	0	0	0	0	0	0	0	0	0	0	0	0	0	0	0	0	0	0	0	0	0	0	0	0	0	125331	0	0	0	129457	0	0	0	0	102681	0	0	180926	0
P	3179	197.095	7.65816	C8H13N4P	196.088					0	0	0	0	0	0	0	0	0	0	0	0	0	0	0	0	0	0	192416	0	0	0	0	0	0	0	0	0	0	0	260166	172076	0	179283	0	133705	0	0	171863	0
P	3271	197.096	2.35434	C14H12O	196.089	-0.0843598	Phenylmethanethiol; S-tert-Butyl, S-oxide (S-)	C11H16OS		0	0	0	0	0	0	0	0	0	0	0	0	0	0	0	0	0	0	0	66962.1	0	0	0	0	0	0	0	0	83418.9	0	111945	66175.8	87695.2	78558.8	0	0	0	0	80649.6	0
P	2070	197.097	7.67328	C6H18N2OP2	196.09					0	0	0	0	0	0	0	223685	0	196090	186870	0	0	0	289193	0	0	0	0	220816	248152	0	0	0	0	0	199389	0	0	0	0	0	0	0	0	0	0	260396	0	0
P	5095	197.097	12.6922	C6H18N2OP2	196.09		Phenylmethanethiol; S-tert-Butyl, S-oxide (S-)	C11H16OS		0	0	0	0	0	0	0	0	0	0	0	0	0	0	0	0	0	0	0	0	0	0	0	0	0	0	0	0	0	0	0	0	0	0	0	0	0	167665	0	0
P	5265	197.097	2.35775	C6H18N2OP2	196.09					0	0	0	0	0	0	0	0	0	0	0	0	0	0	0	0	0	0	0	0	0	0	0	0	0	0	0	0	0	0	0	0	0	0	0	0	0	68235.9	0	0
P	4271	197.098	12.6719	C5H17N4PS	196.091		3-Mercapto-2-methyl-1-butanol; (2S,3S)-form, S-Ph	C11H16OS		0	0	0	0	0	0	0	0	0	0	0	0	0	0	0	0	0	0	0	0	0	0	0	0	0	0	0	108570	0	134313	0	0	0	0	95462.7	0	0	0	0	0
P	6531	197.099	2.35418	C5H17N4PS	196.091		Phenylmethanethiol; S-tert-Butyl, S-oxide (S-)	C11H16OS		0	0	0	0	0	0	0	0	0	0	0	0	0	0	0	0	0	0	0	0	0	0	0	0	0	0	0	0	0	0	0	0	0	0	0	0	0	0	0	0
P	2411	197.099	7.66833	C5H17N4PS	196.091					0	0	0	0	0	0	0	0	231274	0	0	0	0	0	0	0	0	0	0	0	0	377150	304290	0	0	0	0	0	0	364833	0	0	0	0	261177	0	0	0	0	0
P	6208	197.1	12.6953	C11H16OS	196.092	0.597971				0	0	0	0	0	0	0	0	0	0	0	0	0	0	0	0	0	0	0	0	0	0	0	0	0	0	0	0	0	0	0	0	0	0	0	0	0	0	0	0
P	2894	197.1	7.66426	C11H16OS	196.092	1.37611	Arabinose; D-form, Di-Me acetal	C7H16O6		0	0	0	0	0	0	0	0	0	0	0	0	0	0	0	378909	0	0	0	0	0	0	0	668342	403902	0	0	330214	0	0	0	0	0	0	0	0	0	0	0	0
P	6441	197.1	2.33788	C11H16OS	196.093	2.62114				0	0	0	0	0	0	0	0	0	0	0	0	0	0	0	0	0	0	0	0	0	0	0	0	0	0	0	0	0	0	0	0	0	0	0	0	0	0	0	0
P	3684	197.101	12.4141	C4H8N10	196.094					0	4857.33	2974.96	6980.25	2282.16	0	0	0	0	0	0	0	0	0	0	7712.34	5659.43	0	0	0	0	0	0	2990.93	0	98445.9	0	0	0	0	0	122328	102425	0	0	0	79992.4	0	0	0
P	207	197.101	7.66198	C4H8N10	196.094					0	416300	352899	342763	404032	0	0	0	0	0	0	0	0	0	0	0	488654	0	0	0	0	0	0	266101	0	468089	0	0	0	0	0	0	0	0	0	0	431916	0	0	0
P	6022	197.102	9.74378	C2H13N8OP	196.095	2.54426				0	6889.23	0	0	286637	12701.2	0	0	0	0	0	0	8283.01	10432.7	0	0	10033.6	11871.2	0	0	0	0	0	0	0	0	0	0	20098.7	0	0	17419.7	9378.02	4839.66	0	0	5650.29	0	0	128270
P	4444	197.103	12.6744	C8H20OS2	196.095		Benzaldehyde; Phenylhydrazone	C13H12N2		0	0	0	0	0	0	0	0	0	0	0	0	0	0	0	0	0	0	0	0	0	0	0	0	0	0	0	0	121817	0	0	0	0	86801.1	0	0	0	0	0	143603
P	983	197.103	7.8066	C8H20OS2	196.096		1-Ethyl-β-carboline	C13H12N2	Alkaloid from the roots of Hannoa klaineana. Also from the bryozoans Cribricellina cribraria and Costaticella hastata	0	0	0	0	2282.16	467340	0	0	0	0	0	0	423561	639256	0	0	0	678858	0	0	0	0	0	0	0	0	0	0	472811	0	0	475778	583491	4331.65	0	0	108767	0	0	684950
P	3999	197.104	12.6662	CH12N10S	196.097					0	0	0	0	0	0	0	0	0	0	0	0	0	0	0	0	0	0	0	0	0	0	0	0	0	0	122140	0	0	0	129544	0	0	0	0	80018.3	0	0	133937	0
P	1427	197.104	7.66145	CH12N10S	196.097		Benzaldehyde; Phenylhydrazone	C13H12N2		0	0	0	0	0	0	564745	0	0	0	0	531691	0	0	1.13584e+06	0	0	0	842529	0	0	0	0	0	0	0	0	0	843827	0	801944	699296	0	644372	0	633926	0	0	889841	0
P	5537	197.105	9.99385	C6H17N2O3P	196.097		1-Methyl-β-carboline; N9-Me	C13H12N2	Alkaloid from a mangrove-derived fungus, ZZF42	0	0	0	0	0	0	0	0	0	0	0	0	0	0	0	0	0	0	0	0	0	0	0	0	0	0	0	0	0	0	0	0	0	0	0	0	0	0	209829	0
P	1833	197.106	7.67322	C5H16N4O2S	196.099					0	0	0	0	0	0	0	757031	0	693273	651737	0	0	0	0	0	0	0	0	907519	1.02458e+06	0	0	0	0	0	902128	0	0	0	0	0	0	0	0	0	0	1.28148e+06	0	0
P	5158	197.106	12.6922	C5H16N4O2S	196.099					0	0	0	0	0	0	0	0	0	0	0	0	0	0	0	0	0	0	0	0	0	0	0	0	0	0	0	0	0	0	0	0	0	0	0	0	0	127755	0	0
P	5116	197.106	9.99344	C5H16N4O2S	196.099					0	0	0	0	0	0	0	0	0	0	0	0	0	0	0	0	0	0	0	0	0	0	0	0	0	0	0	0	0	0	0	0	0	0	0	0	0	259760	0	0
P	4327	197.107	12.6702	C13H12N2	196.1	-0.953187				0	0	0	0	0	0	0	0	0	0	0	0	0	0	0	0	0	0	0	0	0	0	0	0	0	0	0	214388	0	169233	0	0	0	0	0	0	0	0	0	0
P	2264	197.108	7.66624	C13H12N2	196.1	1.53677				0	0	0	0	0	0	0	0	813973	0	0	0	0	0	0	0	0	0	0	0	0	1.59329e+06	1.20291e+06	0	0	0	0	0	0	1.18433e+06	0	0	0	0	1.14175e+06	0	0	0	0	0
P	6178	197.108	9.99337	C5H18N4P2	196.101					0	0	0	0	0	0	0	0	0	0	0	0	0	0	0	0	0	0	0	0	0	0	0	0	0	0	0	0	0	0	0	0	0	0	0	0	0	0	0	0
P	6269	197.109	12.6953	C11H17OP	196.101					0	0	0	0	0	0	0	0	0	0	0	0	0	0	0	0	0	0	0	0	0	0	0	0	0	0	0	0	0	0	0	0	0	0	0	0	0	0	0	0
P	2872	197.109	7.66988	C11H17OP	196.101					0	0	0	0	0	0	0	0	0	0	0	0	0	0	0	1.41554e+06	0	0	0	0	0	0	0	2.1253e+06	1.47647e+06	0	0	1.43667e+06	0	0	0	0	0	0	0	0	0	0	0	0
[truncated: 4,647 more rows]
[truncated: 9 more columns]
