# Supplementary material for: Metabolite profiling of endophytic Streptomyces spp. and its antiplasmodial potential
Source: PeerJ. 2021 Mar 15;9:e10816. doi: 10.7717/peerj.10816 (PMC7971094; doi:10.7717/peerj.10816)
Supplement: Supplemental Information 2 — List of significant metabolites in two-way ANOVA. [file peerj-09-10816-s002.xlsx]

## Sheet: Sheet1
Name of putative compound	(RT,m/z value)
Diethylstilbestrol	9.11min 269.155m/z
Brassitin; 1-Methoxy	10.32min 251.162m/z
4,10-Dihydroxy-10-methyldodecanoic acid; (4ξ,10ξ)-form, Î´-Lactone	10.69min 229.178m/z
Aconicarpyrazine B; (S)-form	13.39min 195.193m/z
Pirbuterol	10.04min 241.154m/z
Streptazone F	9.87min 186.080m/z
Aspergillic acid	11.56min 225.160m/z
Akanthomycin; N-Deoxy	9.99min 280.123m/z
Quinolactacide	9.74min 237.146m/z
Tomaymycin; 11-Demethoxy	11.61min 275.142m/z
Fasoracetam	9.95min 197.129m/z
Fusaric acid	11.56min 180.101m/z
2-Amino-3-(2-pyridinyl)propanoic acid; (S)-form	9.18min 167.118m/z
Sibyllimycin	8.52min 151.083m/z
Cyclo(methionylprolyl); (3S,8aS)-form	8.10min 229.101m/z
Abikoviromycin; 1,7a-Dihydro	9.54min 164.106m/z
3-Acetyl-2,7-naphthyridine	7.73min 173.068m/z
Antibiotic 386A	11.08min 231.092m/z
Waikialide B	11.44min 223.142m/z
Actinolactomycin	9.78min 203.121m/z
3-Aminodihydro-2(3H)-thiophenone; (ξ)-form, N-Propanoyl	4.35min 174.053m/z
3-methyl-2-Quinoxalinone	7.61min 161.070m/z
Safranal	1.77min 151.082m/z
Huperzine A	14.00min 243.148m/z
Latifoline	10.33min 394.186m/z
Dihydro-5-(6-methyloctyl)-2(3H)-furanone; (ξ)-form	12.94min 213.179m/z
4-(Dimethylamino)cinnamaldehyde	10.22min 176.108m/z
Atrazine	11.73min 216.102m/z
Atractylodin	12.18min 183.081m/z
Violapyrone B; 5'-Hydroxy	9.40min 241.153m/z
8-Amino-2-methyl-7-oxononanoic acid; (2R,8S)-form	2.39min 202.048m/z
Ammodendrine	14.45min 209.164m/z
Amprolium	11.86min 243.160m/z
Ellipticine; 8-Hydroxy	9.67min 263.100m/z
Aurantioclavine	10.49min 227.156m/z
Trichostatin A; N-Deoxy, N-(2-sulfoethyl)	8.78min 395.191m/z
Cyclo(prolylvalyl); (3R,8aS)-form, 8a-Hydroxy	6.14min 213.122m/z
Pilocarpic acid	7.96min 227.139m/z
Isosorbide 5-mononitrate	10.02min 192.050m/z
Cyclo(prolyltyrosyl); (3S,8aS)-form	2.39min 261.089m/z
3-(2-Alkyl-5-oxazolyl)-1H-indoles; 3-(2-Butyl-5-oxazolyl)-1H-indole	12.56min 241.137m/z
Amiclenomycin	12.64min 197.097m/z
Blastmycetin B; 3-Deoxy	11.62min 318.189m/z
4-Acetyl-6-methyl-2(1H)-pyridinone (streptokordin)	10.06min 152.060m/z
Desdamethine	12.09min 187.111m/z
Rose oxide	7.58min 155.120m/z
3-Aminodihydro-2(3H)-furanone; (S)-form, N-Undecanoyl	10.04min 270.940m/z
Guanidinosuccinic Acid	9.30min 176.066m/z
Benzoic acid; Isopropyl ester	8.81min 165.101m/z
2-Hydroxy-3-isopropylpyrazine; OH-form, Me ether	8.89min 153.101m/z
Maniwamycin B; 2-Ketone	12.44min 199.166m/z
1-Acetyl-4-isopropenylcyclopentene	7.56min 151.085m/z
4-Quinolinemethanol (Mefloquine)	2.36min 160.074m/z
Oxosorbicillinol	11.12min 265.103m/z
5-Methyl-3-(5-methylhexyl)-2(5H)-furanone	10.36min 197.176m/z
Penicinoline	15.54min 255.083m/z
Primocarcin	2.38min 185.091m/z
Ophiobolin H; 21α-Methoxy, 5-Me ether	9.73min 429.318m/z
2-Decyl-4-hydroxyquinoline	9.27min 286.225m/z
Antibiotic CP 101765	10.95min 619.383m/z
Tubelactomicin B	10.37min 457.352m/z
Tryptophan; (±)-form, N1-Me, amide	8.77min 218.152m/z
Tryprostatin A	10.66min 382.150m/z
2-Methoxyaniline; N-Ac	10.46min 166.083m/z
Bohemamine; Deepoxy	10.44min 249.151m/z
Neuraminic acid	2.38min 268.102m/z
Pentamycin	10.26min 671.398m/z
(-)-Mucronulatol	6.97min 303.122m/z
Limazepine F; 9-Methoxy, 11-deoxy	12.54min 259.142m/z
4-Aminobenzaldehyde; N-Me, N-nitroso	10.20min 165.090m/z
Vasicinol	7.85min 205.096m/z
Isopentenyl adenosine	8.75min 336.165m/z
Cyclo(prolyltryptophyl); (3S,8aS)-form	9.27min 284.138m/z
Megasporizine	11.21min 289.153m/z
Aspercyclide A	9.05min 411.208m/z
Antibiotic SF 2771	10.03min 181.122m/z
Hydroquinine	9.51min 327.207m/z
3-Isopropyl-6-methylene-2,5-piperazinedione; (S)-form	4.28min 169.096m/z
1-Vinyl-β-carboline (pavettine)	10.72min 195.150m/z
2-Acetamidobenzoic acid; Amide	9.05min 179.101m/z
3,4,5,6-Tetrahydroxy-1-cyclohexene-1-carboxaldehyde; 6-Pentanoyl	8.17min 259.118m/z
1,3,5-Undecatriene; (3E,5Z)-form	10.35min 151.141m/z
6-Dimethylaminopurine	1.98min 164.093m/z
4,23-Dihydroxy-22-oxo-3,4-seco-12-oleanen-3-oic acid	8.68min 489.246m/z
N-(2-Aminopropanoyl)benzeneacetamide; (ξ)-form	12.88min 207.144m/z
D-Biotin	7.24min 245.094m/z
PD 125375	8.32min 219.111m/z
2-Hydroxy-6-pentylbenzyl alcohol; 1'-Me ether	10.52min 209.153m/z
Cyclo(leucyltyrosyl); (3S,6S)-form	7.37min 277.116m/z
Cyclo(isoleucyltryptophyl); (1'R,3S,6R)-form	9.48min 300.229m/z
3-Benzyl-6-isopropyl-2,5-piperazinedione; (3S,6S)-form	10.92min 247.141m/z
2-Amino-4-hydroxy-2-cyclohexen-1-one; (R)-form, N-Ac	8.36min 170.070m/z
Agroclavine; (-)-form, 10-Epimer, 8β,9β-epoxide	10.96min 255.153m/z
5-Benzyl-3-hydroxy-2-isopropylpyrazine	10.99min 229.132m/z
Tryptophan; (S)-form, Ethylamide	9.25min 232.178m/z
Streptazone F	8.89min 186.058m/z
N-Methyltryptamine	10.35min 175.146m/z
3-Aminodihydro-2(3H)-furanone; (S)-form, N-(3R-Hydroxytetradecanoyl)	10.36min 328.283m/z
2-Alkyl-3,4-dihydroxyquinolines; 2-Hexyl-3,4-dihydroxyquinoline	10.36min 246.208m/z
Plantagonine	8.69min 178.087m/z
2-Methoxyaniline; N-Ac	2.02min 166.073m/z
Agroclavine; (-)-form, 10-Epimer, 8β,9β-epoxide	9.85min 255.169m/z
2-Amino-9,13-dimethylheptadecanoic acid	9.71min 314.275m/z
2-Methyl-2,5,6-bornanetriol; (1S,2R,4R,5S,6R)-form	9.42min 201.136m/z
Oxopropaline D; (R)-form, 2'-Deoxy	10.28min 255.119m/z
2,4-Dihydroxybenzoic acid; 4-Me ether, amide	11.26min 168.064m/z
2,5-Bis(2-methylpropyl)pyrazine	10.35min 193.158m/z
Valilactone	11.66min 398.239m/z
3,4,5-Trimethyl-1,2-benzenediol	8.65min 153.098m/z
Propofol	11.94min 179.142m/z
Flazine; Me ester	11.74min 323.106m/z
Cyclo(leucylseryl); (3S,6S)-form	9.69min 201.101m/z
6-[2-(1-Hydroxybutyl)-4-methylphenyl]-5-hexenamide; (E)-form	7.55min 276.212m/z
Loline	3.18min 155.080m/z
Hydroxytyrosol 1-O-glucoside	11.58min 317.123m/z
Isoquinoline; N-Benzyl	12.65min 221.178m/z
Pyranonigrin D	8.90min 236.171m/z
Hygroscopin A	14.72min 257.193m/z
4,23-Dihydroxy-22-oxo-3,4-seco-12-oleanen-3-oic acid	8.97min 489.247m/z
Cyclo(leucylprolyl); (3S,8aS)-form =gancidin W	3.98min 211.109m/z
β-Carboline-3-carboxylic acid; Me ester	10.26min 227.081m/z
2,4,6-Trimethyl-2,4-decadienoic acid; (2E,4E,6R)-form	10.27min 211.160m/z
Cyclo(prolylthreonyl)	3.34min 199.110m/z
S-Methyl benzenecarbothioate	2.17min 153.037m/z
Abikoviromycin; 1,7a-Dihydro, 7-hydroxy	8.97min 180.547m/z
N-2-Acetylguanine	8.58min 194.112m/z
Mansouramycin A	9.24min 217.096m/z
Maculosin	8.35min 261.124m/z
1-Deoxynojirimycin	2.38min 164.091m/z
3,6-Bis(2-methylpropyl)-2,5-piperazinedione; (3S,6S)-form	9.65min 227.173m/z
3-Benzylidene-6-isobutylidene-2,5-piperazinedione; (2E,5Z)-form, 1-N-Me	12.22min 271.146m/z
Antimycin A; Antimycin A3	8.10min 521.237m/z
D-Biotin	3.85min 245.094m/z
Elenaic acid	9.48min 243.085m/z
Harman	7.64min 183.092m/z
Pyocyanin	11.91min 211.086m/z
Leptofuranin A; 24-Aldehyde	8.97min 511.229m/z
Cyclo(phenylalanylprolylphenylalanylprolyl)	3.91min 489.181m/z
Cyclo(isoleucylprolylleucylprolyl); (all-L)-form	8.69min 421.279m/z
5-(6-Hydroxy-6-methylheptyl)-2(5H)-furanone; (S)-form	9.09min 213.159m/z
Penicillide; (S)-form, 1'-Ac	11.93min 415.214m/z
