# Supplementary material for: Metabolite profiling of endophytic Streptomyces spp. and its antiplasmodial potential
Source: PeerJ. 2021 Mar 15;9:e10816. doi: 10.7717/peerj.10816 (PMC7971094; doi:10.7717/peerj.10816)
Supplement: Supplemental Information 3 — The m/z value and retention time (minutes) of significant metabolites of ANOVA test. [file peerj-09-10816-s003.xlsx]

## Sheet: Sheet1
Name of compound	(RT,m/z value)
(S)-3-Methylthiohexyl hexanoate	9.11min 269.155m/z
11-Hydroxy-9-tridecenoic acid	10.32min 251.162m/z
3-Boronoalanine	8.70min 134.062m/z
2-Trimethylsilyl-1-ethylboronic acid pinacol ester	10.69min 229.178m/z
2,5-ditert-butyl-3,4,6-trideuterio-pyridine	13.39min 195.193m/z
Pirbuterol	10.04min 241.154m/z
Psoralen	9.87min 186.080m/z
Aspergillic acid	11.56min 225.160m/z
Ipriflavone	9.99min 280.123m/z
4-Acetoxy-2-hexyltetrahydrofuran	9.74min 237.146m/z
Eserine	11.61min 275.142m/z
3,4-Dihydroxy-L-phenylalanine	9.95min 197.129m/z
Theobromine	11.56min 180.101m/z
Pyridoxal	9.18min 167.118m/z
Guanine	8.52min 151.083m/z
1-fluoro-2-[2-(4-methoxyphenyl)ethenyl]-benzene	8.10min 229.101m/z
Guanine	9.54min 164.106m/z
cyanomethyl(methanimidoyloxy)boron	6.39min 118.031m/z
7,8-Dihydro-3-methylpyrrolo[1,2-a]pyrimidin-2(6H)-one	7.73min 173.068m/z
hydroxy(1H-pyrazol-4-yl)boron	8.90min 118.031m/z
Benzo(b)phenazine	11.08min 231.092m/z
hexamethylene bisacetamide	11.44min 223.142m/z
thiazolidide 3	9.78min 203.121m/z
p-Acetamidophenol (Acetaminophen, Tylenol)	4.35min 174.053m/z
Feruloylputrescine	11.82min 264.130m/z
Indole-3-carboxylic_acid	7.61min 161.070m/z
L-Methionine	2.43min 149.065m/z
Ryscinic Acid	1.77min 151.082m/z
Prilocaine	14.00min 243.148m/z
Rotenone	10.33min 394.186m/z
4,8-Dimethyl-2-(prop-2-en-1-yl)-2-borabicyclo[3.3.1]nonane	12.94min 213.179m/z
N-Acetyltranylcypromine	10.22min 176.108m/z
Atrazine	11.73min 216.102m/z
Atractylodin	12.18min 183.081m/z
1,3-Propanediamine, N,N'-bis(trimethylsilyl)-	9.40min 241.153m/z
N-Acetylanthranilate	2.39min 202.048m/z
Ammodendrine	14.45min 209.164m/z
Cytidine	11.86min 243.160m/z
3'-Oxopentobarbitone	9.67min 263.100m/z
1,2-difluorobenzene;lithium	10.28min 122.051m/z
Flindersine	10.49min 227.156m/z
cis-3-Hexenyl b-primeveroside	8.78min 395.191m/z
Diethyl(naphthalen-1-yl)alumane	6.14min 213.122m/z
2'-Deoxycytidine	7.96min 227.139m/z
Isocitrate	10.02min 192.050m/z
Tryptophylglycine	2.39min 261.089m/z
N,N'-Dimethylurea	5.29min 111.053m/z
Phloretin	12.05min 274.085m/z
2',4-Dihydroxychalcone	12.56min 241.137m/z
cis-stilbene oxide	12.64min 197.097m/z
Myricetin	11.62min 318.189m/z
Camphor	10.06min 152.060m/z
Ricinine	12.09min 187.111m/z
L-Histidine	7.58min 155.120m/z
Pelargonidin	10.04min 270.940m/z
L-Cysteine	9.57min 122.093m/z
6-Hydroxy-4-methylcoumarin, 6-Hydroxy-4-methyl-2-benzopyrone	9.30min 176.066m/z
DL-Methionine sulfoxide	8.81min 165.101m/z
Tyramine	11.57min 137.070m/z
3-Sulfino-L-alanine	8.89min 153.101m/z
Harmol	12.44min 199.166m/z
L-Lysine 1,6-lactam	7.56min 151.085m/z
Tyramine	2.36min 160.074m/z
Anisomycin	11.12min 265.103m/z
3,4-Dihydroxy-L-phenylalanine	10.36min 197.176m/z
Benzoylmesaconine	9.96min 589.276m/z
N-alpha-(tert-Butoxycarbonyl)-L-histidine	15.54min 255.083m/z
Barbital	2.38min 185.091m/z
8-Benzylcanadine	9.73min 429.318m/z
Kaempferol	9.27min 286.225m/z
Asparagoside B	10.95min 619.383m/z
phenyl(1,2,9,10-tetramethoxy-6-methyl-5,6-dihydro-4H-dibenzo[de,g]quinolin-7-yl)methanone	10.37min 457.352m/z
(-)-N-Formylcytisine	8.77min 218.152m/z
4-Butyloxazole	8.82min 148.073m/z
1-(2,3-dibenzimidazol-2-ylpropyl)-2-methoxybenzene	10.66min 382.150m/z
Formononetin-7-O-glucoside
(S)-(-)-Perillic acid	10.46min 166.083m/z
Parthenolide	10.44min 249.151m/z
L-Glutamate	9.50min 148.074m/z
Adenosine	2.38min 268.102m/z
Fungichromin	10.26min 671.398m/z
Cytosine	1.47min 112.049m/z
Quercetin	6.97min 303.122m/z
Metabutethamine	12.54min 259.142m/z
Kojic acid	10.20min 165.090m/z
L-Tryptophan	7.85min 205.096m/z
Isopentenyl adenosine	8.75min 336.165m/z
Adenine	9.90min 135.118m/z
Guanosine	9.27min 284.138m/z
Atropine	11.21min 289.153m/z
Forskolin	9.05min 411.208m/z
Fructose	10.03min 181.122m/z
Hydroquinine	9.51min 327.207m/z
Norcantharidin	4.28min 169.096m/z
Glucuronic acid	10.72min 195.150m/z
Esculetin	9.05min 179.101m/z
6-Methylflavone	8.17min 259.118m/z
L(-)-Verbenone	10.35min 151.141m/z
6-Dimethylaminopurine	1.98min 164.093m/z
Asiatic acid	8.68min 489.246m/z
Dimethylesculetin	12.88min 207.144m/z
Buthionine sulfoximine;	7.24min 245.094m/z
2-Isopropyl-3,5-dimethoxy-6-methylpyrazine	8.32min 219.111m/z
n,n'-dinitrosopiperazine	9.15min 145.072m/z
4-Heptyloxyphenol	10.52min 209.153m/z
Capensine	7.37min 277.116m/z
2-(6-amino-8-sulfanylpurin-9-yl)-5-(hydroxymethyl)oxolane-3,4-diol	9.48min 300.229m/z
Achillin	10.92min 247.141m/z
L-Cysteic acid	8.36min 170.070m/z
Lithium 2-(dimethylhydrazinylidene)propan-1-ide	1.49min 129.098m/z
Hypoxanthine	5.55min 137.070m/z
Chrysophanic acid	10.96min 255.153m/z
Icariin	10.46min 677.354m/z
Resveratrol	10.99min 229.132m/z
Isoalantolactone	9.25min 232.178m/z
5-(2-Hydroxyethyl)-4-methylthiazole acetate	8.89min 186.058m/z
L-Arginine	10.35min 175.146m/z
L-Lysyl-D-alanyl-L-phenylalanylglycyl-L-valyl-L-valylglycinamide	11.61min 698.394m/z
Boldine	10.36min 328.283m/z
2-Hydroxychalcone	10.36min 246.208m/z
Plantagonine	8.69min 178.087m/z
Ephedrine	2.02min 166.073m/z
5,3'-Dihydroxyflavone	9.85min 255.169m/z
Yttrium hexafluoroacetylacetonate	8.95min 732.869m/z
Feruloyltyramine	9.71min 314.275m/z
tert-Butyl (diethylalumanyl)acetate	9.42min 201.136m/z
10-deacetylbaccatin (10-DAB)	9.24min 567.268m/z
Ketoprofen	10.28min 255.119m/z
Isorhamnetin-3-O-glucoside	7.77min 510.181m/z
4-acetamidobutanoate	11.26min 168.064m/z
Aminofluoropropionic acid	8.07min 122.061m/z
Scopoletin	10.35min 193.158m/z
Riboflavin	11.66min 398.239m/z
Vanillin	8.65min 153.098m/z
Propofol	11.94min 179.142m/z
2-cyanoethyl(trifluoro)boranuide	2.27min 123.046m/z
Chloramphenicol	11.74min 323.106m/z
bromo-tris[(2,6-diphenylphenyl)methyl]silane	8.27min 837.256m/z
Harmalol	9.69min 201.101m/z
Eserine	7.55min 276.212m/z
Loline	3.18min 155.080m/z
Rhamnetin	11.58min 317.123m/z
5,7-Dimethoxy-4-methylcoumarin	12.65min 221.178m/z
2',3'-Dideoxyadenosine	8.90min 236.171m/z
Pinocembrine	14.72min 257.193m/z
L-Serine	9.65min 105.069m/z
Asiatic acid	8.97min 489.247m/z
Jasmonic acid	3.98min 211.109m/z
L-Threonine	8.98min 120.078m/z
Genipin	10.26min 227.081m/z
Dihydrochalcone	10.27min 211.160m/z
Rhubafuran	3.34min 199.110m/z
S-Methyl benzenecarbothioate	2.17min 153.037m/z
Fusaric acid	8.97min 180.547m/z
N-2-Acetylguanine	8.58min 194.112m/z
Pilocarpidine	9.24min 217.096m/z
alpha-D-Glucose 6-phosphate	8.35min 261.124m/z
1-Deoxynojirimycin	2.38min 164.091m/z
Ethambutol	9.65min 227.173m/z
Genistein	12.22min 271.146m/z
DEACETOXY(7)-7-OXOKHIVORINIC ACID	8.10min 521.237m/z
D-Biotin	3.85min 245.094m/z
HuperzineA	9.48min 243.085m/z
Harman	7.64min 183.092m/z
4,6-bis(trideuteriomethyl)pyrimidin-2-amine	9.27min 130.124m/z
Pyocyanin	11.91min 211.086m/z
hexylsulfanylboron	7.39min 129.090m/z
Bisdemethoxycurcumin	3.19min 309.153m/z
(2S)-2-amino-3-(3,4,5-trimethoxyphenyl)propanoic acid	8.97min 511.229m/z
Clobetasol propionate	3.91min 489.181m/z
4-Deoxyphloridzin	8.69min 421.279m/z
Hematoporphyrin	9.09min 621.269m/z
Harmine	9.09min 213.159m/z
Kalihinol A	11.93min 415.214m/z
