# Supplementary material for: Metabolite profiling of endophytic Streptomyces spp. and its antiplasmodial potential
Source: PeerJ. 2021 Mar 15;9:e10816. doi: 10.7717/peerj.10816 (PMC7971094; doi:10.7717/peerj.10816)
Supplement: Supplemental Information 5 — List of common metabolites of both Streptomyces spp. [file peerj-09-10816-s005.xlsx]

## Sheet: Sheet1
Retention time	m/z value	Compound name (DNP)	Molecular Formula	Source
7.86min	696.427m/z	Unknown
9.02min	150.090m/z	unknown
9.22min	161.070m/z	Octanethioic acid; SH-form	C8H16OS
2.00min	251.148m/z	Isopentyl beta-D-glucoside	C11H22O6
8.97min	489.247m/z	Striatal B	C27H36O8	Constit. of Cyathus striatus	Complex of 245.1172 and 245.1371 m/z	488.241	-0.65035
7.74min	197.128m/z	Fasoracetam	C10H16N2O2
7.86min	732.314m/z	unknown
9.36min	247.143m/z	Tryptophan; (S)-form, Nα,Nα-Di-Me, Me ester	C14H18N2O2	Alkaloid present in Pultenaea altissima, seeds of Abrus precatorius, Erythrina variegata and others
9.09min	213.159m/z	1,4'-Bipiperidine-1'-carboxylic acid	C11H20N2O2
7.64min	183.092m/z	Harman	C12H10N2
9.24min	217.096m/z	Decarestrictine D	C10H16O5	Prod. by Penicillium corylophilum FH-A 6390 and Penicillium simplicissimum FH-A 6090. Also from Botryotrichum sp. NRRL 38180 and Polyporus tuberaster
10.17min	160.072m/z	3-(4-Hydroxyphenyl)-2-propenoic acid; (E)-form, Me ether, nitrile	C10H9NO
11.28min	171.093m/z	unknown
8.29min	681.099m/z	Jubanine A	C40H49N5O6	Alkaloid from the root or stem bark of Zizyphus jujuba, Zizyphus nummularia and Zizyphus spina-christi (Rhamnaceae)
8.34min	471.257m/z	3-Aminospirostan-6-ol; (3β,5α,6α,25S)-form, N-Ac	C29H47NO4
2.25min	143.073m/z	unknown
8.97min	511.229m/z	Deuteroporphyrin XIII	C30H30N4O4	Synthetic
7.94min	487.252m/z	unknown
2.38min	185.091m/z	1-Methyl-β-carboline; 3,4-Dihydro	C12H12N2	Alkaloid from Flindersia laevicarpa, Elaeagnus angustifolia, Strychnos dale and Burkea africana
4.28min	169.096m/z	4-Methylbiphenyl	C13H12	Present in cocoa
9.70min	152.018m/z	unknown
7.78min	679.388m/z	Gingerglycolipid B	C33H58O14
2.39min	197.093m/z	Phenylmethanethiol; S-tert-Butyl, S-oxide (S-)	C11H16OS
8.50min	211.143m/z	6-(1-Methylethyl)-3-(2-methylpropyl)-2(1H)-pyrazinone; 1'-Hydroxy	C11H18N2O2	Metab. of Aspergillus sojae
11.68min	773.493m/z	unknown
8.97min	267.110m/z	5,7-Diamino-5,7,9-trideoxynon-2-ulosonic acid	C9H18N2O7	Component of lipopolysaccharides of a phytopathogenic Pseudomonas sp.
6.14min	213.122m/z	unknown
8.35min	120.079m/z	unknown
9.09min	425.311m/z	unknown
7.98min	138.065m/z	unknown
7.98min	195.088m/z	Auxofuran; (S)-form	C11H14O3	Prod. by Streptomyces strain AcH 505
8.10min	185.127m/z	unknown
9.48min	243.085m/z	unknown
2.80min	185.091m/z	unknown
9.09min	523.285m/z	1,4,6-Eudesmanetriol; (1α,4β,5β,6β,7β,10α)-form, 1-Benzoyl, 6-O-β-D-glucopyranoside	C28H42O9	Constit. of Kadsura ananosma
8.33min	136.074m/z	unknown
11.66min	398.239m/z	Guineensine; (E,E,E)-form, 3-Methylbutylamide analogue	C25H35NO3	Alkaloid from the fruit of Piper nigrum (black pepper)
8.37min	263.966m/z	unknown
8.10min	521.237m/z	Asterriquinone; Mono-Me ether	C33H32N2O4	Prod. by Aspergillus candidus
8.69min	421.279m/z	unknown
9.85min	261.159m/z	Multiflorine; 13α-Hydroxy, 5,6-didehydro	C15H20N2O2	Alkaloid from Lupinus albus (Leguminosae)
2.39min	261.089m/z	1,5-Anhydroxylitol; Tri-Ac	C11H16O7
9.07min	311.135m/z	6-Acetyl-3,4-dihydro-2,2-dimethyl-2H-1-benzopyran-3,4,5,7-tetrol; (3ξ,4ξ)-form, 4-Et, 7-Me ether	C16H22O6	Constit. of Evodia lepta and Melicope pteleifolia
8.54min	487.288m/z	unknown
8.11min	261.122m/z	Cyclo(prolyltyrosyl); (3R,8aR)-form	C14H16N2O3	Prod. by Streptomyces sp. GW33/1593
11.91min	211.086m/z	Pyocyanine	C13H10N2O	Prod. by Bacillus pyocyaneus, Streptomyces cyanoflavus and Pseudomonas aeruginosa
9.00min	245.129m/z	Cyclo(L-Phe-L-Pro)	C14H16N2O2
7.37min	277.116m/z	unknown
10.71min	185.075m/z	unknown
7.37min	171.113m/z	Levetiracetam	C8H14N2O2
10.00min	334.153m/z	unknown
8.35min	260.925m/z	unknown
8.71min	211.145m/z	1,6,8,14-Hexadecatetraene-10,12-diyne	C16H18
8.75min	336.165m/z	Isopentenyl adenosine	C15H21N5O4
3.98min	211.109m/z	5,7-Pentadecadien-9,11,13-triynal; (5E,7E)-form	C15H14O	Isol. from leaves of several Compositae spp. e.g. Centaurea cristata, Centaurea pullata
7.94min	453.268m/z	Emetine; O6',O7'-Di-de-Me	C27H36N2O4	Alkaloid from Cephaelis acuminata
3.18min	155.080m/z	unknown
3.85min	245.094m/z	N3-(4-fluorophenyl)-1H-pyrazolo[3,4-d]pyrimidine-3,4-diamine	C11H9FN6
8.39min	180.103m/z	unknown
8.35min	261.124m/z	Tryptophan; (R)-form, Nα-Ac, Me ester	C14H16N2O3
8.70min	455.263m/z	Rhodojaponin IV	C24H38O8
9.27min	284.138m/z	unknown
8.49min	199.142m/z	unknown
8.11min	798.383m/z	unknown
7.96min	227.139m/z	6,8-Hexadecadiene-10,12,14-triyn-1-ol	C16H18O	Isol. from leaves and stems of Leuzea centauroides
9.96min	295.142m/z	6-Acetyl-3,4-dihydro-2,5-dihydroxy-2-(2-hydroxypropyl)-3,8-dimethyl-2H-1-benzopyran	C16H22O5	Prod. by Penicillium sp. DCS523
9.54min	164.106m/z	2-Phenylethylamine; N-Ac	C10H13NO	Prod. by Streptomyces sp. Lz53, Tricladium sp. GU288817 and a marine-derived Bacillus subtilis. Also isol. from Gracilaria lemaneiformis
9.09min	621.269m/z	unknown
8.36min	521.237m/z	Cyclo(prolyltyrosylprolyltyrosyl)	C28H32N4O6	Prod. by Lactobacillus helveticus
6.69min	130.031m/z	unknown
